# Supplementary material for: Substituent-dependent generation of tricyclic frameworks by the rhodium-catalyzed cycloisomerization of homopropargyl allene-alkynes: a theoretical study
Source: Royal Society of Chemistry journal article supplement (doi:10.1039/d0dt00508h), 2020-01-01
Supplement: d0dt00508h1.pdf [file d0dt00508h1.pdf]

## Supporting Information

### Substituent-dependent generation of tricyclic frameworks by the rhodium-catalyzed cycloisomerization of homopropargyl allene-alkynes: a theoretical study

Ping Wang<sup>a,b</sup>, Jing Zhang<sup>a,b</sup>, Lingli Han<sup>a,b,\*</sup>, Siwei Bi<sup>b,\*</sup>, Tao Liu<sup>a,b,\*</sup>

<sup>a</sup> Department of Chemistry and Chemical Engineering, Jining University, Qufu 273155, Shandong, China

<sup>b</sup> School of Chemistry and Chemical Engineering, Qufu Normal University, Qufu 273165, Shandong, China

Correspondent author email addresses: [hll\\_2002@sina.com](mailto:hll_2002@sina.com), [siwei@126.com](mailto:siwei@126.com) and [liutao\\_2005@126.com](mailto:liutao_2005@126.com)

#### Table of Contents

|                                                                                                                                                                |     |
|----------------------------------------------------------------------------------------------------------------------------------------------------------------|-----|
| 1. Other unfavorable <b>cat-R1</b> coordination without the participant of 1,4-dioxane.....                                                                    | S2  |
| 2. Other unfavorable <b>cat-R2</b> coordination without the participant of 1,4-dioxane.....                                                                    | S3  |
| 3. The unfavorable alkyne insertion process in reaction A.....                                                                                                 | S4  |
| 4. The unfavorable stepwise pathway for the formation of <b>P2<sup>A</sup></b> from <b>INT-4aa</b> .....                                                       | S5  |
| 5. The unfavorable stepwise pathway for the formation of <b>INT-3b</b> from <b>INT-3bb</b> .....                                                               | S6  |
| 6. The unfavorable stepwise pathway for the formation of <b>P2<sup>B</sup></b> from <b>INT-4bb</b> .....                                                       | S7  |
| 7. The unfavorable free energy diagram for the alkyne insertion mechanism in reaction C.....                                                                   | S8  |
| 8. Comparisons for the $\beta$ -hydride elimination mechanism and alkyne insertion one by replacing the dimethyl of substrate <b>R2</b> with other groups..... | S9  |
| 9. Calculated solution-phase Gibbs free energies $\Delta G_{sol}$ of all species (in Hartree).....                                                             | S10 |
| 10. Cartesian coordinates of all calculated species.....                                                                                                       | S12 |

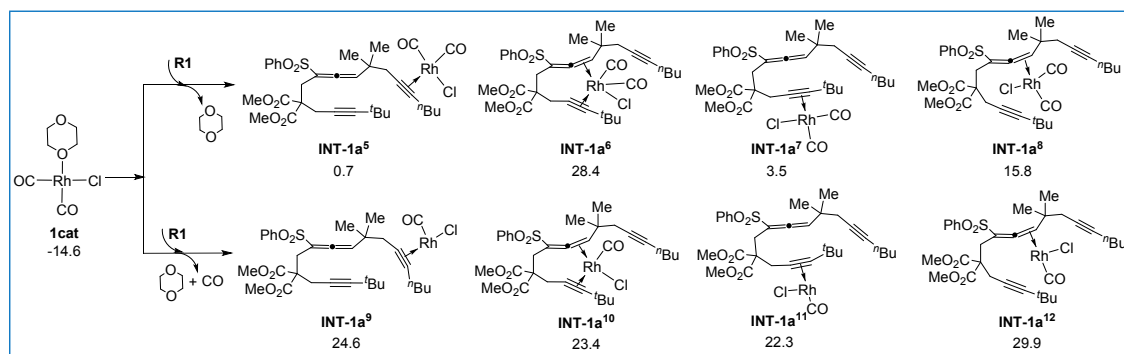

**Scheme S1** Other unfavorable **cat–R1** coordination without the participant of 1,4-dioxane. The relative free energies are given in kcal/mol.

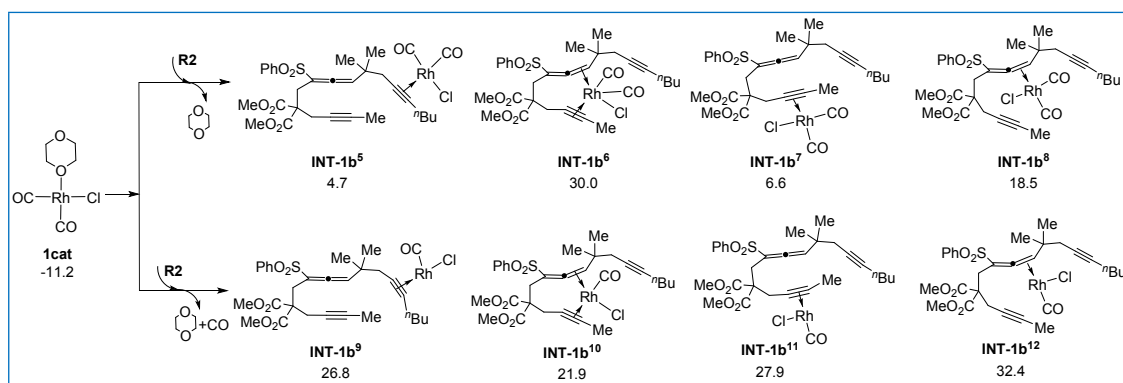

**Scheme S2** Other unfavorable **cat–R2** coordination without the participant of 1,4-dioxane. The relative free energies are given in kcal/mol.

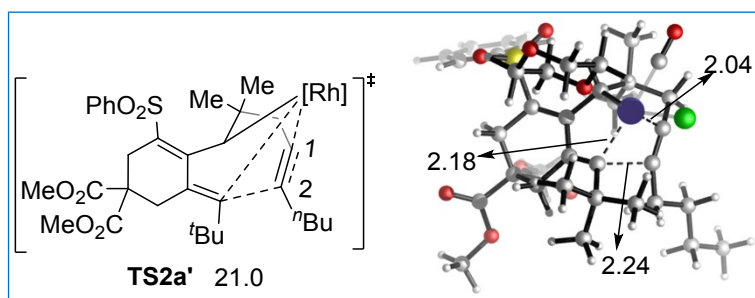

**Fig. S1** The unfavorable alkyne insertion process in reaction A. The relative free energies are given in kcal/mol. Bond distances are given in Å.

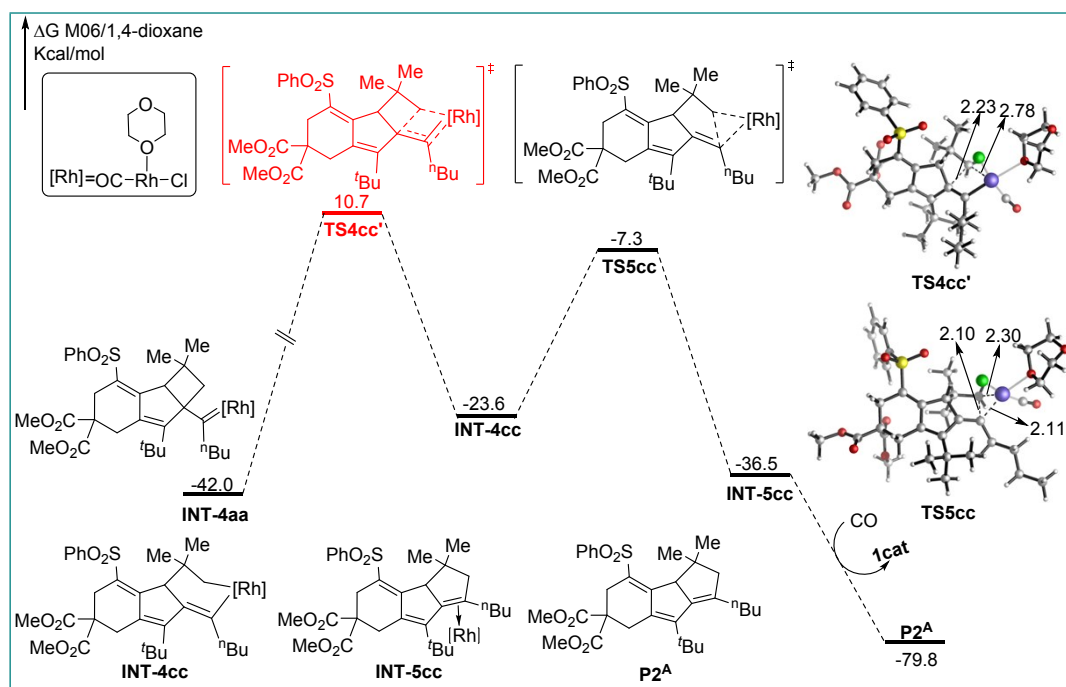

**Fig. S2** The unfavorable stepwise pathway for the formation of **P2<sup>A</sup>** from **INT-4aa**. Bond distances are given in Å.

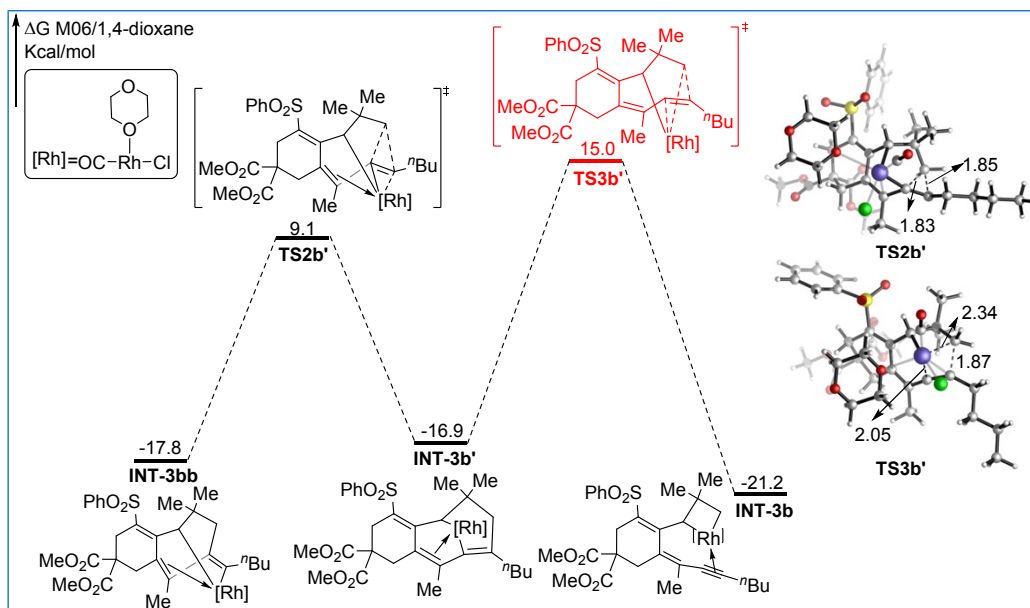

**Fig. S3** The unfavorable stepwise pathway for the formation of **INT-3b** from **INT-3bb**. Bond distances are given in  $\text{\AA}$ .

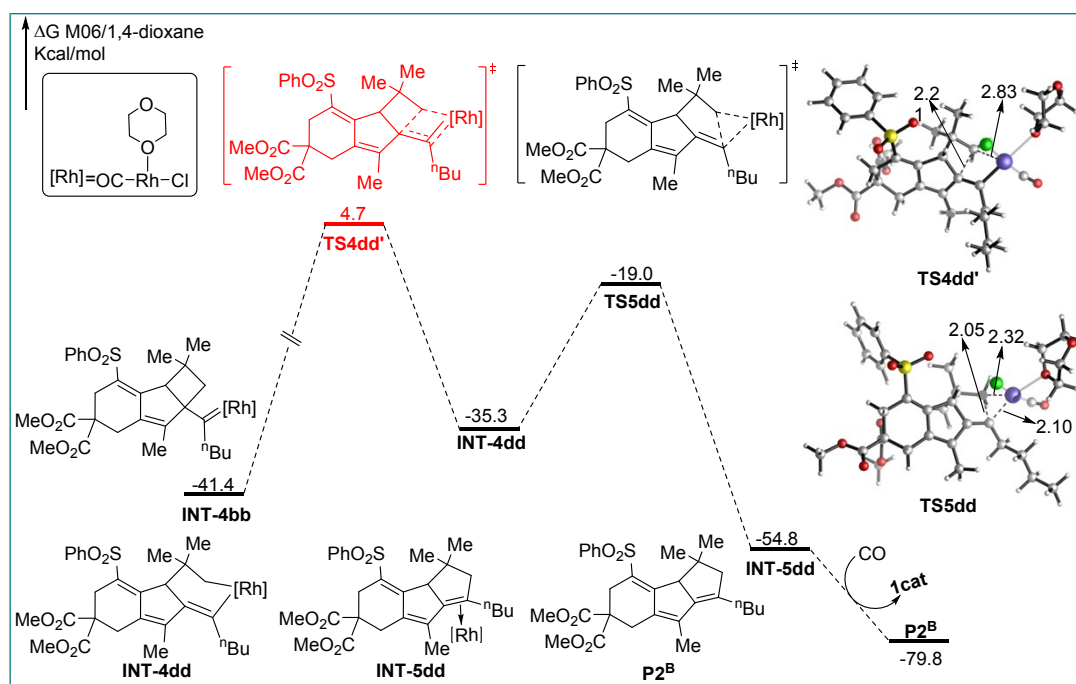

**Fig. S4** The unfavorable stepwise pathway for the formation of **P2<sup>B</sup>** from **INT-4bb**. Bond distances are given in Å.

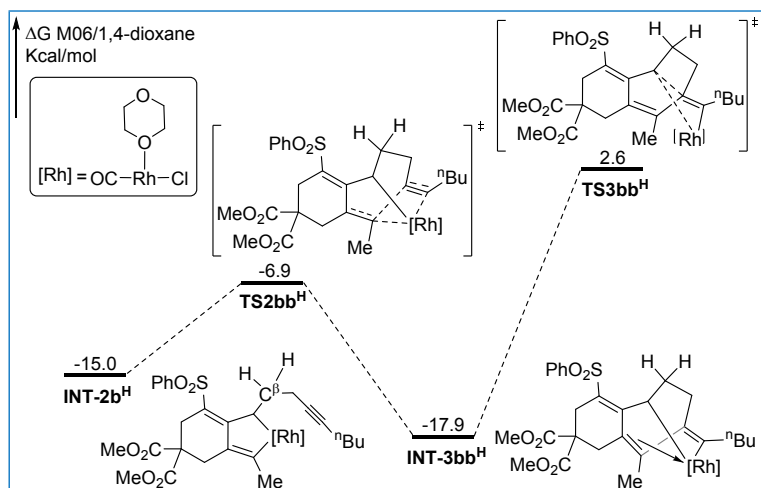

**Fig. S5** The unfavorable free energy diagram for the alkyne insertion mechanism in reaction C. The relative free energies are given in kcal/mol.



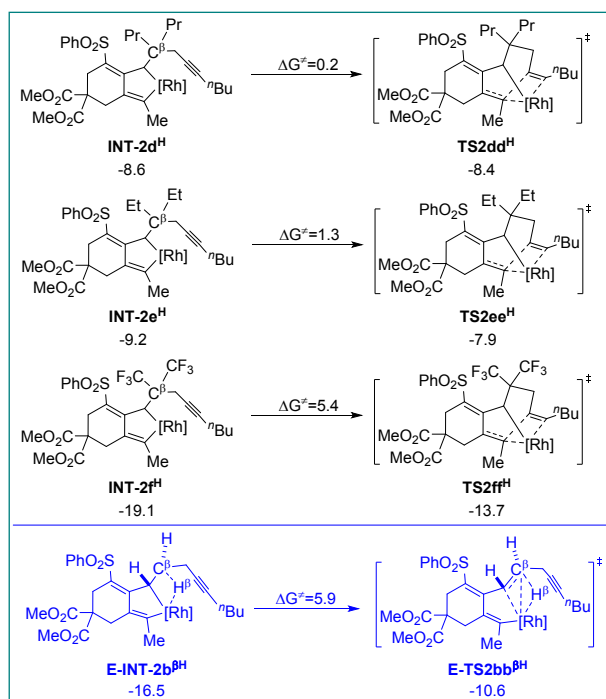

**Fig. S6** Comparisons for the  $\beta$ -hydride elimination mechanism and alkyne insertion one by replacing the dimethyl of substrate **R2** with other groups. The relative free energies are given in kcal/mol.

**Table S1** Calculated solution-phase Gibbs free energies  $\Delta G_{sol}$  of all species (in Hartree)

| species                     | $\Delta G_{sol}$ | species                       | $\Delta G_{sol}$ |
|-----------------------------|------------------|-------------------------------|------------------|
| <b>R1</b>                   | -2093.3393744    | <b>TS4aa</b>                  | -3085.0921967    |
| <b>R2</b>                   | -1975.4612779    | <b>INT-5aa</b>                | -3085.1444069    |
| <b>R3</b>                   | -1896.870631     | <b>P1<sup>A</sup></b>         | -2093.4428887    |
| <b>cat</b>                  | -1594.9340247    | <b>TS4cc</b>                  | -3085.0847564    |
| <b>1cat</b>                 | -1105.0120917    | <b>INT-5cc</b>                | -3085.1295697    |
| <b>INT-1a<sup>1</sup></b>   | -3085.0535606    | <b>P2<sup>A</sup></b>         | -2093.4617369    |
| <b>INT-1b<sup>1</sup></b>   | -2967.1796995    | <b>TS1b</b>                   | -2967.1466189    |
| <b>INT-1a<sup>2</sup></b>   | -3085.0486479    | <b>INT-2b</b>                 | -2967.212839     |
| <b>INT-1b<sup>2</sup></b>   | -2967.1692998    | <b>TS2bb</b>                  | -2967.2072953    |
| <b>INT-1a<sup>3</sup></b>   | -3085.0423748    | <b>INT-3bb</b>                | -2967.2217311    |
| <b>INT-1b<sup>3</sup></b>   | -2967.1659642    | <b>TS3b</b>                   | -2967.1205848    |
| <b>INT-1a<sup>4</sup></b>   | -3085.0490936    | <b>INT-3b</b>                 | -2967.2242651    |
| <b>INT-1b<sup>4</sup></b>   | -2967.1702044    | <b>TS3bb</b>                  | -2967.1941075    |
| <b>INT-1a<sup>5</sup></b>   | -2890.8119917    | <b>INT-4bb</b>                | -2967.2574653    |
| <b>INT-1b<sup>5</sup></b>   | -2772.9343421    | <b>TS4bb</b>                  | -2967.2335504    |
| <b>INT-1a<sup>6</sup></b>   | -2890.7746613    | <b>INT-5bb</b>                | -2967.2734843    |
| <b>INT-1b<sup>6</sup></b>   | -2772.8978798    | <b>P2<sup>B</sup></b>         | -1975.5971111    |
| <b>INT-1a<sup>7</sup></b>   | -2890.81184      | <b>TS4dd</b>                  | 2967.2236369     |
| <b>INT-1b<sup>7</sup></b>   | -2772.9316904    | <b>INT-5dd</b>                | -2967.2813073    |
| <b>INT-1a<sup>8</sup></b>   | -2890.7928596    | <b>P1<sup>B</sup></b>         | -1975.5708947    |
| <b>INT-1b<sup>8</sup></b>   | -2772.9155608    | <b>TS1b<sup>H</sup></b>       | -2888.5662912    |
| <b>INT-1a<sup>9</sup></b>   | -2777.4755529    | <b>INT-2b<sup>H</sup></b>     | -2888.6280989    |
| <b>INT-1b<sup>9</sup></b>   | -2659.5974905    | <b>Z-TS2bb<sup>BH</sup></b>   | -2888.579266     |
| <b>INT-1a<sup>10</sup></b>  | -2777.4859046    | <b>E-TS2bb<sup>BH</sup></b>   | -2888.5802073    |
| <b>INT-1b<sup>10</sup></b>  | -2659.6124096    | <b>E-INT-2b<sup>BH</sup></b>  | -2888.6268495    |
| <b>INT-1a<sup>11</sup></b>  | -2777.4814708    | <b>Z-INT-2b<sup>BH</sup></b>  | -2888.6281663    |
| <b>INT-1b<sup>11</sup></b>  | -2659.5984711    | <b>Z-TS2bb<sup>BH</sup></b>   | -2888.6151145    |
| <b>INT-1a<sup>12</sup></b>  | -2777.471632     | <b>E-TS2bb<sup>BH</sup></b>   | -2888.6190998    |
| <b>INT-1b<sup>12</sup></b>  | -2659.5946024    | <b>Z-INT-3bb<sup>BH</sup></b> | -2888.6188524    |
| <b>INT-1b<sup>10H</sup></b> | -2581.0297263    | <b>E-INT-3bb<sup>BH</sup></b> | -2888.6211714    |
| <b>TS1a</b>                 | -3085.0274894    | <b>Z-TS3bb<sup>BH</sup></b>   | -2888.6025001    |
| <b>INT-2a</b>               | -3085.0880188    | <b>E-TS3bb<sup>BH</sup></b>   | -2888.6045799    |
| <b>TS2a</b>                 | -3085.035783     | <b>Z-INT-4bb<sup>BH</sup></b> | -2888.644573     |
| <b>TS2aa</b>                | -3085.0679239    | <b>E-INT-4bb<sup>BH</sup></b> | -2888.6437505    |
| <b>INT-3a</b>               | -3085.0507604    | <b>Z-P3</b>                   | -1896.9305039    |
| <b>INT-3aa</b>              | -3085.0858027    | <b>E-P3</b>                   | -1896.9295784    |
| <b>TS3aa</b>                | -3085.0580163    | <b>R-INT-2c<sup>H</sup></b>   | -2927.9233139    |
| <b>INT-4aa</b>              | -3085.1318858    | <b>R-TS2cc<sup>H</sup></b>    | -2927.9166715    |

| species                                       | $\Delta G_{sol}$ | species                    | $\Delta G_{sol}$ |
|-----------------------------------------------|------------------|----------------------------|------------------|
| <b>E-INT-2c<sup><math>\beta</math>H</sup></b> | -2927.9256123    | <b>TS4dd'</b>              | -2967.1776302    |
| <b>E-TS2cc<sup><math>\beta</math>H</sup></b>  | -2927.9183804    | <b>INT-4dd</b>             | -2967.249833     |
| <b>S-INT-2c<sup>H</sup></b>                   | -2927.9377781    | <b>TS5dd</b>               | -2967.2244001    |
| <b>S-TS2cc<sup>H</sup></b>                    | -2927.9113779    | <b>TS2bb<sup>H</sup></b>   | -2888.6203517    |
| <b>Z-INT-2c<sup><math>\beta</math>H</sup></b> | -2927.9243005    | <b>INT-3bb<sup>H</sup></b> | -2888.6389323    |
| <b>Z-TS2cc<sup><math>\beta</math>H</sup></b>  | -2927.916897     | <b>TS3bb<sup>H</sup></b>   | -2888.6038909    |
| <b>TS2a'</b>                                  | -3085.0349292    | <b>INT-2d<sup>H</sup></b>  | -3124.3639097    |
| <b>TS4cc'</b>                                 | -3085.0453402    | <b>TS2dd<sup>H</sup></b>   | -3124.3682051    |
| <b>INT-4cc</b>                                | -3085.1063445    | <b>INT-2e<sup>H</sup></b>  | -3045.7791304    |
| <b>TS5cc</b>                                  | -3085.0798629    | <b>TS2ee<sup>H</sup></b>   | -3045.7816931    |
| <b>TS2b'</b>                                  | -2967.1759248    | <b>INT-2f<sup>H</sup></b>  | -3562.6769827    |
| <b>INT-3b'</b>                                | -2967.2217489    | <b>TS2ff<sup>H</sup></b>   | -3562.6695862    |
| <b>TS3b'</b>                                  | -2967.1651217    |                            |                  |

**Cartesian coordinates of all calculated species**

**R1**

|   |              |             |             |
|---|--------------|-------------|-------------|
| C | 0.09751200   | -4.46076300 | -4.92556400 |
| C | -0.77658200  | -3.43780500 | -5.71441100 |
| H | -0.17326900  | -3.04137400 | -6.53393400 |
| H | -1.59294300  | -4.00687900 | -6.16296800 |
| C | -0.66217200  | -5.09297900 | -3.72414800 |
| H | 0.03420100   | -5.73982700 | -3.18161500 |
| H | -0.92827600  | -4.28481100 | -3.03802500 |
| C | -1.38370900  | -2.28652300 | -4.93132200 |
| C | -2.56764300  | -2.26382200 | -4.37085400 |
| C | -3.77494300  | -2.16203700 | -3.87697100 |
| H | -4.55571700  | -1.85691400 | -4.57909300 |
| C | -4.25466500  | -2.42122100 | -2.45420600 |
| C | -5.25912500  | -3.61992000 | -2.54583100 |
| H | -6.04080200  | -3.37003800 | -3.27684600 |
| H | -4.71611500  | -4.48204900 | -2.95412500 |
| C | -5.88493300  | -3.98795700 | -1.27528100 |
| C | -6.39475800  | -4.29303400 | -0.21998300 |
| C | -7.03753400  | -4.69692100 | 1.03221900  |
| C | -8.13066900  | -5.76892800 | 0.83534200  |
| H | -7.47783100  | -3.81632800 | 1.52034300  |
| H | -6.27774600  | -5.07889700 | 1.72821600  |
| C | -8.79072000  | -6.19139300 | 2.15294900  |
| H | -8.89031600  | -5.38079300 | 0.14540900  |
| H | -7.68634000  | -6.64359700 | 0.34417900  |
| C | -9.87651100  | -7.25526500 | 1.96269800  |
| H | -8.02096600  | -6.57093700 | 2.83883900  |
| H | -9.22439500  | -5.30818800 | 2.64172000  |
| H | -10.32932300 | -7.53929600 | 2.91812000  |
| H | -10.67764400 | -6.89075800 | 1.30991500  |
| H | -9.46597300  | -8.16284300 | 1.50588400  |
| C | -1.84116700  | -5.85991500 | -4.12753200 |
| C | -2.78669100  | -6.52032100 | -4.49915300 |
| C | 0.49985000   | -5.57479400 | -5.90856300 |
| O | 0.14583200   | -5.65922900 | -7.06204000 |
| O | 1.29165100   | -6.48028500 | -5.29804800 |
| C | 1.36476700   | -3.78116200 | -4.38684900 |
| O | 1.50061500   | -3.40584900 | -3.23964400 |
| O | 2.28858300   | -3.64825900 | -5.34453700 |
| C | 1.72447300   | -7.57501500 | -6.12306300 |
| H | 2.29168000   | -7.20560200 | -6.98073100 |
| H | 2.35352200   | -8.19395000 | -5.48367700 |
| H | 0.86463500   | -8.14447600 | -6.48405500 |
| C | 3.46285800   | -2.89175100 | -4.99063200 |
| H | 4.12787500   | -2.97008000 | -5.85010500 |
| H | 3.17981900   | -1.85305900 | -4.81471500 |

|           |             |             |             |
|-----------|-------------|-------------|-------------|
| H         | 3.93132300  | -3.31197900 | -4.09798900 |
| S         | -0.50048800 | -0.68141900 | -5.01668900 |
| O         | 0.91285500  | -0.99496100 | -5.30101300 |
| O         | -1.24389100 | 0.21060300  | -5.92183100 |
| C         | -0.60513100 | 0.02509700  | -3.36284300 |
| C         | 0.20068000  | -0.48307100 | -2.34011700 |
| C         | -1.46689700 | 1.10290000  | -3.15510300 |
| C         | 0.12201700  | 0.10267700  | -1.07588700 |
| H         | 0.86853400  | -1.31758300 | -2.52723100 |
| C         | -1.53083800 | 1.68035300  | -1.88552700 |
| H         | -2.05790900 | 1.48045300  | -3.98205700 |
| C         | -0.74061200 | 1.17891100  | -0.84872200 |
| H         | 0.74037600  | -0.27949400 | -0.26923000 |
| H         | -2.19208400 | 2.52362700  | -1.70972200 |
| H         | -0.79269100 | 1.63085300  | 0.13767500  |
| C         | -4.98396900 | -1.15399900 | -1.96066500 |
| H         | -5.79078700 | -0.86609700 | -2.64421200 |
| H         | -5.42418200 | -1.33407900 | -0.97555300 |
| H         | -4.28704200 | -0.31384800 | -1.88486600 |
| C         | -3.10322600 | -2.77293400 | -1.50301400 |
| H         | -2.60535900 | -3.69625500 | -1.81260800 |
| H         | -2.35905800 | -1.97240300 | -1.47073500 |
| H         | -3.49012800 | -2.92787400 | -0.49218900 |
| C         | -3.90884200 | -7.35660400 | -4.96710000 |
| C         | -4.69423400 | -7.89790400 | -3.74929000 |
| C         | -4.84703400 | -6.51377400 | -5.86209000 |
| C         | -3.34091900 | -8.54023700 | -5.78661300 |
| H         | -4.04647500 | -8.49478600 | -3.10027400 |
| H         | -5.11272400 | -7.08212400 | -3.15203500 |
| H         | -5.52026200 | -8.53278800 | -4.08841000 |
| H         | -4.31086900 | -6.12415500 | -6.73242600 |
| H         | -5.68000700 | -7.12985000 | -6.21848800 |
| H         | -5.26061900 | -5.66537300 | -5.30894000 |
| H         | -4.15812500 | -9.17158400 | -6.15300900 |
| H         | -2.77033700 | -8.17864400 | -6.64721400 |
| H         | -2.67863300 | -9.15779600 | -5.17236500 |
| <b>R2</b> |             |             |             |
| C         | 0.16549900  | -4.45735100 | -4.95123100 |
| C         | -0.72847200 | -3.44847700 | -5.73573100 |
| H         | -0.13253700 | -3.03682500 | -6.55308300 |
| H         | -1.53314200 | -4.03144700 | -6.18736800 |
| C         | -0.57313400 | -5.09679000 | -3.74153400 |
| H         | 0.12804600  | -5.75882700 | -3.22419200 |
| H         | -0.81232200 | -4.29420100 | -3.03884700 |
| C         | -1.35963100 | -2.31293000 | -4.94893600 |
| C         | -2.54728700 | -2.31414200 | -4.39579000 |
| C         | -3.75918400 | -2.23683000 | -3.90905900 |
| H         | -4.54089500 | -1.94072900 | -4.61399200 |

|   |              |             |             |           |              |             |             |
|---|--------------|-------------|-------------|-----------|--------------|-------------|-------------|
| C | -4.24067000  | -2.50399500 | -2.48851300 | H         | -2.08638300  | 1.44150700  | -3.96622300 |
| C | -5.25770000  | -3.69192000 | -2.58451900 | C         | -0.76379500  | 1.12757900  | -0.83632300 |
| H | -6.02997900  | -3.43633800 | -3.32338700 | H         | 0.73459300   | -0.31842200 | -0.27067500 |
| H | -4.72180200  | -4.56333400 | -2.98268200 | H         | -2.23116500  | 2.46298200  | -1.68475500 |
| C | -5.89896700  | -4.04313600 | -1.31685900 | H         | -0.82064400  | 1.57003200  | 0.15410300  |
| C | -6.42293800  | -4.33027400 | -0.26353700 | C         | -4.95663200  | -1.23230900 | -1.98607300 |
| C | -7.08425600  | -4.71179900 | 0.98607900  | H         | -5.76299600  | -0.93354000 | -2.66553200 |
| C | -8.16680000  | -5.79534900 | 0.79405800  | H         | -5.39543400  | -1.41320000 | -1.00053200 |
| H | -7.53890200  | -3.82395400 | 1.44723700  | H         | -4.25153000  | -0.39922300 | -1.90885000 |
| H | -6.33429200  | -5.07320600 | 1.70337800  | C         | -3.09093200  | -2.87454400 | -1.54244600 |
| C | -8.85108200  | -6.18917300 | 2.10821000  | H         | -2.60078100  | -3.79746700 | -1.86533200 |
| H | -8.91461300  | -5.42924100 | 0.07960300  | H         | -2.34130100  | -2.07940400 | -1.50140300 |
| H | -7.70762600  | -6.67916700 | 0.33388100  | H         | -3.47769900  | -3.03834500 | -0.53292200 |
| C | -9.92582400  | -7.26505600 | 1.92282000  | <b>R3</b> |              |             |             |
| H | -8.09325900  | -6.54583100 | 2.81919800  | C         | 0.01359800   | -4.49567900 | -4.94836200 |
| H | -9.30043700  | -5.29689900 | 2.56529200  | C         | -0.62891400  | -3.37763400 | -5.82721100 |
| H | -10.39709800 | -7.52739400 | 2.87551400  | H         | 0.14798300   | -2.97016000 | -6.47698700 |
| H | -10.71512500 | -6.92311900 | 1.24393600  | H         | -1.36450600  | -3.86504200 | -6.46988000 |
| H | -9.49989400  | -8.18134600 | 1.49860300  | C         | -1.00863000  | -5.15857700 | -3.98061200 |
| C | -1.77514100  | -5.84077300 | -4.11839000 | H         | -0.47245700  | -5.88574800 | -3.36313600 |
| C | -2.75321800  | -6.47270800 | -4.44902200 | H         | -1.37203600  | -4.38528200 | -3.29797000 |
| C | -3.92566500  | -7.24735300 | -4.84824600 | C         | -1.31536000  | -2.24810400 | -5.08097200 |
| H | -4.08631400  | -8.09758500 | -4.17590100 | C         | -2.54426200  | -2.24234900 | -4.63122800 |
| H | -4.83496900  | -6.63602900 | -4.83326900 | C         | -3.76630800  | -2.19202100 | -4.16684600 |
| H | -3.80860800  | -7.64290100 | -5.86332100 | H         | -4.55494000  | -1.86184100 | -4.84612000 |
| C | 0.58020100   | -5.56404500 | -5.93771700 | C         | -4.18771900  | -2.58635000 | -2.77029500 |
| O | 0.23367100   | -5.64423700 | -7.09358500 | C         | -5.09756700  | -3.84178300 | -2.77898100 |
| O | 1.37758600   | -6.46607300 | -5.32881900 | H         | -5.95398200  | -3.66012500 | -3.44312500 |
| C | 1.42827000   | -3.75989100 | -4.42307000 | H         | -4.53984000  | -4.67838000 | -3.21877200 |
| O | 1.57172700   | -3.38756900 | -3.27589200 | C         | -5.57634700  | -4.19685200 | -1.44292700 |
| O | 2.33917900   | -3.60907200 | -5.39033700 | C         | -5.95225600  | -4.46778900 | -0.32468100 |
| C | 1.82813300   | -7.54911400 | -6.15999900 | C         | -6.43726900  | -4.82401800 | 1.01008400  |
| H | 2.40170300   | -7.16630000 | -7.00752600 | C         | -7.72521100  | -5.67434800 | 0.98433600  |
| H | 2.45523800   | -8.16934100 | -5.51997400 | H         | -6.61993800  | -3.90879300 | 1.59036700  |
| H | 0.97708100   | -8.12167700 | -6.53644400 | H         | -5.65274500  | -5.37141900 | 1.55099900  |
| C | 3.50411000   | -2.83334500 | -5.04689100 | C         | -8.22154400  | -6.04144300 | 2.38745900  |
| H | 4.15925500   | -2.89464500 | -5.91526900 | H         | -8.50553700  | -5.12232400 | 0.44566100  |
| H | 3.20449500   | -1.80102300 | -4.86104300 | H         | -7.53761300  | -6.58681300 | 0.40471700  |
| H | 3.99151200   | -3.25013900 | -4.16283200 | C         | -9.49918100  | -6.88660700 | 2.36798900  |
| S | -0.50438100  | -0.69218100 | -5.02128300 | H         | -7.43039800  | -6.58540200 | 2.92152500  |
| O | 0.91329400   | -0.97959600 | -5.31209700 | H         | -8.39879500  | -5.12190600 | 2.96208900  |
| O | -1.26487600  | 0.19580600  | -5.91612500 | H         | -9.83042800  | -7.13341900 | 3.38188200  |
| C | -0.61634700  | -0.00223100 | -3.36079200 | H         | -10.31825100 | -6.35507300 | 1.87044000  |
| C | 0.19620800   | -0.50974100 | -2.34303900 | H         | -9.34264300  | -7.82857900 | 1.83040900  |
| C | -1.49041000  | 1.06360200  | -3.14300800 | C         | -2.12025000  | -5.81301800 | -4.67092900 |
| C | 0.11120000   | 0.06358500  | -1.07353100 | C         | -3.02115900  | -6.36520400 | -5.26141900 |
| H | 0.87483900   | -1.33375300 | -2.53790600 | C         | -4.10378700  | -7.03988300 | -5.97299800 |
| C | -1.56025500  | 1.62904200  | -1.86830400 | H         | -4.46987400  | -7.90519900 | -5.40915600 |

|             |             |             |             |                           |             |             |             |
|-------------|-------------|-------------|-------------|---------------------------|-------------|-------------|-------------|
| H           | -4.95296800 | -6.36783100 | -6.13974400 | C                         | -4.42149200 | -0.72856500 | -5.30025900 |
| H           | -3.76727200 | -7.39859700 | -6.95204300 | C                         | -3.21719200 | -1.10258100 | -6.16684000 |
| C           | 0.57773500  | -5.56335200 | -5.90220600 | O                         | -4.55037300 | -1.66663600 | -4.18661200 |
| O           | 0.49782600  | -5.54195000 | -7.10871100 | O                         | -3.14367300 | -2.50809800 | -6.32185600 |
| O           | 1.16366400  | -6.55895100 | -5.20561800 | H                         | -4.32457500 | 0.28632200  | -4.90266200 |
| C           | 1.15956600  | -3.91104400 | -4.10836900 | H                         | -5.35498400 | -0.82720600 | -5.85959100 |
| O           | 1.05409400  | -3.59409000 | -2.94059800 | H                         | -3.34257000 | -0.67323700 | -7.16467100 |
| O           | 2.27478100  | -3.78054200 | -4.83417600 | H                         | -2.28649400 | -0.69380400 | -5.74632500 |
| C           | 1.72774900  | -7.61616200 | -5.99994500 | H                         | -3.51958900 | -2.98549400 | -3.01464600 |
| H           | 2.50717000  | -7.22416800 | -6.65778800 | H                         | -2.56448800 | -1.60643600 | -3.57450500 |
| H           | 2.14716000  | -8.32677500 | -5.28812400 | H                         | -1.82261500 | -3.43105300 | -4.99247400 |
| H           | 0.95470900  | -8.09129200 | -6.60854200 | H                         | -3.45948000 | -4.11479800 | -5.12676100 |
| C           | 3.37145600  | -3.09789600 | -4.19474100 | Rh                        | -5.67744600 | -0.92169700 | -2.45312100 |
| H           | 4.20788800  | -3.18099300 | -4.88792500 | Cl                        | -3.93023700 | 0.64688100  | -2.10810300 |
| H           | 3.10036300  | -2.05252600 | -4.04039000 | C                         | -6.54051300 | -0.23076400 | -0.96491600 |
| H           | 3.60974900  | -3.57173700 | -3.24008400 | O                         | -7.05000700 | 0.21476300  | -0.03894500 |
| S           | -0.38892700 | -0.67376200 | -4.95315300 | C                         | -7.03938300 | -2.18389600 | -2.79239700 |
| O           | 1.04215500  | -1.03309400 | -4.96292000 | O                         | -7.86261700 | -2.95515500 | -3.01396300 |
| O           | -0.90973900 | 0.26481600  | -5.96062100 | <b>INT-1a<sup>1</sup></b> |             |             |             |
| C           | -0.79996400 | -0.01346800 | -3.32882900 | C                         | -1.96460600 | -5.63531300 | -5.20765800 |
| C           | -0.26094300 | -0.60953100 | -2.18506200 | C                         | -1.33073100 | -4.35294500 | -5.82390500 |
| C           | -1.61912700 | 1.11326400  | -3.25683100 | H                         | -0.48955900 | -4.65136600 | -6.44945700 |
| C           | -0.56764100 | -0.06009000 | -0.94021900 | H                         | -2.06044300 | -3.88639500 | -6.48615300 |
| H           | 0.37787100  | -1.48302400 | -2.26703000 | C                         | -2.82443500 | -5.36064900 | -3.94759600 |
| C           | -1.91188400 | 1.65414000  | -2.00363800 | H                         | -3.24175500 | -6.31235400 | -3.60481300 |
| H           | -2.00282500 | 1.55300100  | -4.17073900 | H                         | -2.15296500 | -5.01880200 | -3.15736000 |
| C           | -1.38930200 | 1.06736400  | -0.84944800 | C                         | -0.89664000 | -3.31991300 | -4.80534100 |
| H           | -0.15917400 | -0.51037300 | -0.04045600 | C                         | -1.72609400 | -2.42048200 | -4.29971800 |
| H           | -2.54492400 | 2.53346300  | -1.93093000 | C                         | -2.16946600 | -1.34286700 | -3.56443400 |
| H           | -1.61972700 | 1.49078900  | 0.12400500  | H                         | -1.95706800 | -0.36690100 | -4.00299900 |
| H           | -3.30942700 | -2.77154900 | -2.14640900 | C                         | -2.47749500 | -1.23224100 | -2.06526400 |
| H           | -4.73699900 | -1.75382100 | -2.31440100 | C                         | -3.83021600 | -0.46022800 | -1.92956200 |
| <b>cat</b>  |             |             |             | H                         | -3.73589200 | 0.50540200  | -2.44557000 |
| Rh          | -1.83770600 | 0.46649000  | 0.56164800  | H                         | -4.59856500 | -1.01612700 | -2.47666500 |
| Rh          | 0.15453700  | 0.21170400  | -2.08930800 | C                         | -4.26838100 | -0.23506800 | -0.55205100 |
| Cl          | -1.52613300 | 1.86976900  | -1.42843400 | C                         | -4.64207100 | -0.06030100 | 0.58680600  |
| Cl          | -1.29916800 | -1.39711700 | -0.94078500 | C                         | -5.11006100 | 0.18860900  | 1.95189800  |
| C           | -2.21392600 | 1.96486100  | 1.62012700  | C                         | -5.53663600 | 1.65167300  | 2.19630000  |
| O           | -2.43756400 | 2.89782800  | 2.24798300  | H                         | -4.31812400 | -0.08148700 | 2.66438300  |
| C           | -2.03107500 | -0.69884100 | 2.01424300  | H                         | -5.95500700 | -0.47741300 | 2.17610000  |
| C           | 1.19758100  | 1.52981500  | -2.91401000 | C                         | -6.02432000 | 1.89312300  | 3.62949500  |
| C           | 1.38386800  | -1.13392300 | -2.52068600 | H                         | -4.68919000 | 2.31209400  | 1.97425400  |
| O           | -2.14172800 | -1.43335400 | 2.88757900  | H                         | -6.32792600 | 1.91575100  | 1.48378000  |
| O           | 1.82019700  | 2.35644800  | -3.40777900 | C                         | -6.45040200 | 3.34303200  | 3.88022800  |
| O           | 2.12294300  | -1.97435300 | -2.76985900 | H                         | -6.86632200 | 1.22084500  | 3.84414000  |
| <b>1cat</b> |             |             |             | H                         | -5.22830400 | 1.61748400  | 4.33487700  |
| C           | -2.89098400 | -3.18019600 | -5.08847900 | H                         | -6.79250500 | 3.48627300  | 4.91024500  |
| C           | -3.31236800 | -2.34601900 | -3.87448900 | H                         | -5.61926200 | 4.03567700  | 3.70606700  |

|    |             |             |              |                           |             |             |              |
|----|-------------|-------------|--------------|---------------------------|-------------|-------------|--------------|
| H  | -7.26923700 | 3.63631000  | 3.21364700   | O                         | -1.43245800 | -2.11266000 | -8.18502000  |
| C  | -3.95283900 | -4.41967200 | -4.06625600  | H                         | 1.45372600  | -2.75319700 | -9.81234600  |
| C  | -5.04765700 | -3.89738000 | -3.85348800  | H                         | 0.55795900  | -3.88486600 | -8.76600900  |
| C  | -2.79244200 | -6.33481500 | -6.30210200  | H                         | 0.49112400  | -1.66354700 | -7.69500800  |
| O  | -2.91720800 | -5.95443700 | -7.44252900  | H                         | -0.08225200 | -0.91702600 | -9.21687700  |
| O  | -3.37046300 | -7.45286700 | -5.81639300  | H                         | -1.72173800 | -4.48103900 | -9.47743600  |
| C  | -0.83407500 | -6.58840000 | -4.77523400  | H                         | -2.29236600 | -3.75412200 | -11.00424900 |
| O  | -0.51550300 | -6.80208100 | -3.62272900  | H                         | -2.34753100 | -1.51567000 | -9.95292600  |
| O  | -0.22350100 | -7.12235900 | -5.83766700  | H                         | -3.26170300 | -2.63904000 | -8.90285700  |
| C  | -4.15703600 | -8.20088000 | -6.76318800  | C                         | -6.48596100 | -3.77334100 | -3.46231400  |
| H  | -3.53768400 | -8.51652600 | -7.60582600  | C                         | -7.02856200 | -2.33119400 | -3.45792700  |
| H  | -4.53089100 | -9.06501400 | -6.21474900  | C                         | -7.32047600 | -4.64036100 | -4.43661000  |
| H  | -4.98358700 | -7.59196100 | -7.13631900  | C                         | -6.58627600 | -4.35925600 | -2.02922100  |
| C  | 0.97893300  | -7.87050300 | -5.56340200  | H                         | -6.51540600 | -1.71178900 | -2.71737400  |
| H  | 1.29892700  | -8.26653300 | -6.52632400  | H                         | -6.92931300 | -1.86861400 | -4.44077600  |
| H  | 1.73407600  | -7.19856500 | -5.15113900  | H                         | -8.08944000 | -2.35624500 | -3.18788800  |
| H  | 0.77353700  | -8.67940900 | -4.85920100  | H                         | -6.97694100 | -5.67947000 | -4.42735100  |
| S  | 0.90971200  | -3.22253800 | -4.52451300  | H                         | -8.37145800 | -4.62265000 | -4.12785800  |
| O  | 1.45948600  | -4.48949300 | -5.04833100  | H                         | -7.24142300 | -4.25496700 | -5.45445300  |
| O  | 1.37779300  | -1.93725800 | -5.07682400  | H                         | -7.63330800 | -4.34737100 | -1.70829100  |
| C  | 1.24413800  | -3.19075500 | -2.75446700  | H                         | -6.23066800 | -5.39343800 | -1.99518600  |
| C  | 0.98978200  | -4.32349000 | -1.97476800  | H                         | -6.00419300 | -3.76842500 | -1.31584500  |
| C  | 1.87230500  | -2.06168900 | -2.22691600  | <b>INT-1b<sup>1</sup></b> |             |             |              |
| C  | 1.34821800  | -4.29979200 | -0.62648000  | C                         | -1.88282100 | -5.67043300 | -5.21825900  |
| H  | 0.53587500  | -5.20815100 | -2.41016800  | C                         | -1.25651100 | -4.36852800 | -5.80335900  |
| C  | 2.23759500  | -2.05990600 | -0.87891900  | H                         | -0.40205200 | -4.64666500 | -6.42058200  |
| H  | 2.07664200  | -1.21490600 | -2.87279500  | H                         | -1.98102300 | -3.90148000 | -6.47075100  |
| C  | 1.96996400  | -3.17315300 | -0.08019600  | C                         | -2.72507400 | -5.44058200 | -3.93754400  |
| H  | 1.15379900  | -5.16954400 | -0.00624700  | H                         | -3.13357400 | -6.40429200 | -3.61879700  |
| H  | 2.73184200  | -1.19015100 | -0.45672900  | H                         | -2.04418400 | -5.11863400 | -3.14629900  |
| H  | 2.25368900  | -3.16736400 | 0.96818900   | C                         | -0.84817400 | -3.34025100 | -4.76993500  |
| C  | -1.35614800 | -0.37258300 | -1.43651700  | C                         | -1.69268500 | -2.44739700 | -4.27763100  |
| H  | -1.26260500 | 0.59414200  | -1.94402300  | C                         | -2.15497400 | -1.36613900 | -3.55619700  |
| H  | -1.59293200 | -0.17799800 | -0.38615100  | H                         | -1.93489600 | -0.39359200 | -3.99873000  |
| H  | -0.39166900 | -0.88109700 | -1.48653600  | C                         | -2.49125800 | -1.24343600 | -2.06258300  |
| C  | -2.54933600 | -2.58865800 | -1.35347600  | C                         | -3.87970100 | -0.52928300 | -1.95249100  |
| H  | -3.34012900 | -3.21758700 | -1.76818600  | H                         | -3.82919400 | 0.42070300  | -2.50217600  |
| H  | -1.59792900 | -3.12186500 | -1.43345500  | H                         | -4.62675600 | -1.13550300 | -2.47800700  |
| H  | -2.76260800 | -2.43430800 | -0.29241200  | C                         | -4.32328100 | -0.27384400 | -0.58177700  |
| Rh | -3.69238700 | -2.21828500 | -5.03950800  | C                         | -4.69788200 | -0.07072500 | 0.55195900   |
| Cl | -5.46081800 | -2.46479200 | -6.66465900  | C                         | -5.16592100 | 0.21376000  | 1.91006300   |
| C  | -3.27343700 | -0.72201700 | -6.09762800  | C                         | -5.55135800 | 1.69241100  | 2.12751000   |
| O  | -3.07133900 | 0.21503100  | -6.72531000  | H                         | -4.38575300 | -0.06711400 | 2.63131100   |
| C  | -2.27253000 | -2.40431000 | -9.30574300  | H                         | -6.03064100 | -0.42422500 | 2.14025400   |
| C  | -1.70289100 | -3.57312100 | -10.09969900 | C                         | -6.03498500 | 1.97365500  | 3.55473900   |
| C  | 0.46366000  | -2.99723900 | -9.41351200  | H                         | -4.68490600 | 2.32432200  | 1.89591000   |
| C  | -0.09566400 | -1.83221200 | -8.60292300  | H                         | -6.33312400 | 1.96610400  | 1.40813600   |
| O  | -0.37178600 | -3.28761900 | -10.52802300 | C                         | -6.42124000 | 3.43922000  | 3.77743500   |

|    |             |             |             |                           |              |             |              |
|----|-------------|-------------|-------------|---------------------------|--------------|-------------|--------------|
| H  | -6.89573900 | 1.32907300  | 3.77979000  | C                         | -1.78172800  | -3.59490500 | -10.11275100 |
| H  | -5.24830300 | 1.68926200  | 4.26708800  | C                         | 0.35718000   | -2.86684500 | -9.48711100  |
| H  | -6.76160900 | 3.61091700  | 4.80366000  | C                         | -0.26144900  | -1.76996400 | -8.62572600  |
| H  | -5.57085300 | 4.10532900  | 3.59286100  | O                         | -0.49390300  | -3.19338000 | -10.57911500 |
| H  | -7.23009300 | 3.74255400  | 3.10323000  | O                         | -1.55607800  | -2.16524400 | -8.17067400  |
| C  | -3.85426700 | -4.49797100 | -4.00541400 | H                         | 1.30992400   | -2.53562900 | -9.91298400  |
| C  | -4.91746500 | -3.94135300 | -3.74766700 | H                         | 0.54320800   | -3.76004300 | -8.86793100  |
| C  | -2.72831400 | -6.33588500 | -6.32148200 | H                         | 0.34303600   | -1.57866200 | -7.73373500  |
| O  | -2.87667500 | -5.91647200 | -7.44541500 | H                         | -0.34093900  | -0.84097700 | -9.21311000  |
| O  | -3.29303700 | -7.47149600 | -5.86345400 | H                         | -1.70553100  | -4.51447900 | -9.51271500  |
| C  | -0.74625900 | -6.63666200 | -4.83372200 | H                         | -2.38754900  | -3.80172500 | -11.00071700 |
| O  | -0.42045200 | -6.90006700 | -3.69373000 | H                         | -2.57956000  | -1.59878000 | -9.88842800  |
| O  | -0.13795000 | -7.11888900 | -5.92217800 | H                         | -3.36445100  | -2.81515400 | -8.83812700  |
| C  | -4.10393200 | -8.18538400 | -6.81648300 | C                         | -6.27792700  | -3.55681500 | -3.36032200  |
| H  | -3.50594600 | -8.47112800 | -7.68478200 | H                         | -6.27193500  | -2.77533600 | -2.59450500  |
| H  | -4.46507400 | -9.06805200 | -6.28959500 | H                         | -6.82786900  | -3.19356800 | -4.23119000  |
| H  | -4.93871900 | -7.56290000 | -7.14638200 | H                         | -6.79105400  | -4.43463000 | -2.95112300  |
| C  | 1.06917700  | -7.87284900 | -5.68694800 | <b>INT-1a<sup>2</sup></b> |              |             |              |
| H  | 1.38670200  | -8.22373300 | -6.66799400 | C                         | -2.76883400  | -0.97844100 | -5.21317700  |
| H  | 1.82352200  | -7.21687900 | -5.24808400 | C                         | -3.55584000  | 0.36794300  | -5.19318200  |
| H  | 0.87088700  | -8.71331700 | -5.01864900 | H                         | -3.17652200  | 0.98195200  | -6.01383900  |
| S  | 0.95056300  | -3.22367300 | -4.45098600 | H                         | -4.59477300  | 0.13598500  | -5.42827800  |
| O  | 1.53274600  | -4.45874900 | -5.01434500 | C                         | -3.21981300  | -1.97527900 | -4.10282900  |
| O  | 1.40476200  | -1.90742100 | -4.93655900 | H                         | -2.49944800  | -2.79572700 | -4.07247500  |
| C  | 1.24245000  | -3.26257100 | -2.67319200 | H                         | -3.15994800  | -1.46967400 | -3.13455600  |
| C  | 1.01333900  | -4.44021100 | -1.95481500 | C                         | -3.54600800  | 1.19507800  | -3.91833600  |
| C  | 1.80229100  | -2.13372100 | -2.07336300 | C                         | -4.44868500  | 1.19566200  | -2.96813300  |
| C  | 1.32694300  | -4.46484800 | -0.59532000 | C                         | -5.35624400  | 1.34992700  | -2.03678900  |
| H  | 0.61239200  | -5.32172700 | -2.44482800 | H                         | -6.17521200  | 2.03212400  | -2.28176100  |
| C  | 2.12243400  | -2.17916400 | -0.71474000 | C                         | -5.41284800  | 0.75252600  | -0.63693400  |
| H  | 1.99267200  | -1.25078300 | -2.67352000 | C                         | -6.81766900  | 0.07842700  | -0.48692500  |
| C  | 1.87915900  | -3.33918900 | 0.02287600  | H                         | -7.58921400  | 0.81860200  | -0.74125100  |
| H  | 1.15157200  | -5.37043500 | -0.02251000 | H                         | -6.90215100  | -0.72553800 | -1.22809500  |
| H  | 2.56402800  | -1.30996400 | -0.23671200 | C                         | -7.08814900  | -0.46230400 | 0.84524000   |
| H  | 2.12810300  | -3.37024600 | 1.07961900  | C                         | -7.30912900  | -0.90592900 | 1.94997000   |
| C  | -1.41514600 | -0.32526400 | -1.43716400 | C                         | -7.61836800  | -1.46817700 | 3.26605200   |
| H  | -1.36211200 | 0.63844400  | -1.95602900 | C                         | -8.85002400  | -2.39855200 | 3.25428800   |
| H  | -1.66602900 | -0.12921600 | -0.39055600 | H                         | -7.78610300  | -0.65364000 | 3.98460200   |
| H  | -0.42844000 | -0.79108400 | -1.47618500 | H                         | -6.74819400  | -2.02543900 | 3.64011000   |
| C  | -2.51142200 | -2.58906400 | -1.32611600 | C                         | -9.16219300  | -2.98595800 | 4.63541900   |
| H  | -3.27000700 | -3.26036600 | -1.73435700 | H                         | -9.71664700  | -1.83700300 | 2.88367600   |
| H  | -1.53818700 | -3.08359800 | -1.38888600 | H                         | -8.67672300  | -3.20812800 | 2.53462400   |
| H  | -2.74087200 | -2.42417000 | -0.26997800 | C                         | -10.38406700 | -3.91006600 | 4.62919800   |
| Rh | -3.66064100 | -2.26189800 | -4.99846100 | H                         | -8.28613800  | -3.53903500 | 5.00110900   |
| Cl | -5.55691600 | -2.48056700 | -6.47567400 | H                         | -9.32471000  | -2.16751200 | 5.35011700   |
| C  | -3.29820000 | -0.77210500 | -6.08048800 | H                         | -10.58388300 | -4.31547100 | 5.62635200   |
| O  | -3.12918500 | 0.16544200  | -6.71714300 | H                         | -11.28281500 | -3.37594300 | 4.30068200   |
| C  | -2.41212300 | -2.49435000 | -9.26909400 | H                         | -10.23643200 | -4.75638300 | 3.94888000   |



|    |             |             |             |                           |              |             |             |
|----|-------------|-------------|-------------|---------------------------|--------------|-------------|-------------|
| C  | -4.56955400 | -2.54104400 | -4.31598700 | H                         | -2.85853500  | -8.55909100 | -1.10782000 |
| C  | -5.71812000 | -2.75479800 | -4.76147800 | H                         | -4.04636700  | -7.63246200 | -0.16107700 |
| C  | -3.00797100 | -1.64745400 | -6.58272800 | H                         | -3.24109700  | -6.02088400 | -1.73374800 |
| O  | -3.85267100 | -1.30564900 | -7.38400300 | H                         | -3.15494700  | -7.17149800 | -3.07488000 |
| O  | -2.18505500 | -2.68942700 | -6.74195800 | H                         | -5.99279000  | -9.68554800 | -2.98989400 |
| C  | -1.26616200 | -0.71519500 | -5.02694600 | H                         | -4.37131000  | -9.17110500 | -3.47488300 |
| O  | -0.67425700 | -0.87065300 | -3.97684000 | H                         | -5.77809100  | -7.39309300 | -4.29436700 |
| O  | -0.70779500 | -0.28154600 | -6.15920800 | H                         | -6.82639100  | -7.43905400 | -2.83674300 |
| C  | -2.37071400 | -3.47737200 | -7.93545700 | C                         | -6.99268200  | -2.58939600 | -5.52091100 |
| H  | -2.42657700 | -2.82891600 | -8.81182900 | C                         | -8.20404100  | -2.97266600 | -4.64377700 |
| H  | -1.50176000 | -4.13222200 | -7.98732100 | C                         | -7.10847100  | -1.10515700 | -5.94472400 |
| H  | -3.28075300 | -4.07165100 | -7.83814300 | C                         | -6.95375400  | -3.48110000 | -6.78325800 |
| C  | 0.67415100  | 0.11758600  | -6.07672400 | H                         | -8.15328000  | -4.02237700 | -4.34135400 |
| H  | 0.98017900  | 0.31423600  | -7.10372500 | H                         | -8.25433800  | -2.35690100 | -3.74008900 |
| H  | 0.75070300  | 1.02215000  | -5.47206500 | H                         | -9.12815500  | -2.82078000 | -5.21110700 |
| H  | 1.27470700  | -0.68290800 | -5.63958500 | H                         | -6.27923600  | -0.82383900 | -6.59846700 |
| S  | -2.34218300 | 2.58392800  | -3.84717600 | H                         | -8.04423000  | -0.95685200 | -6.49449100 |
| O  | -1.25126300 | 2.24121500  | -4.77865100 | H                         | -7.11782100  | -0.44327400 | -5.07262800 |
| O  | -3.08185200 | 3.84435400  | -4.02509400 | H                         | -7.88636200  | -3.35654400 | -7.34464000 |
| C  | -1.67670200 | 2.58681600  | -2.17209000 | H                         | -6.11787300  | -3.19715500 | -7.42738900 |
| C  | -0.79114200 | 1.58117200  | -1.77395400 | H                         | -6.83656100  | -4.53484000 | -6.51962900 |
| C  | -2.02011400 | 3.64284200  | -1.32718100 | <b>INT-1b<sup>2</sup></b> |              |             |             |
| C  | -0.25581800 | 1.63602100  | -0.48639400 | C                         | -2.51940700  | -1.13159400 | -5.06765900 |
| H  | -0.52771400 | 0.77570400  | -2.45187800 | C                         | -3.38461600  | 0.15248200  | -5.25076500 |
| C  | -1.46944000 | 3.68712600  | -0.04466400 | H                         | -2.98206000  | 0.69762800  | -6.10732300 |
| H  | -2.69482100 | 4.41296800  | -1.68404900 | H                         | -4.38613200  | -0.17515400 | -5.53644800 |
| C  | -0.59316000 | 2.68402000  | 0.37506000  | C                         | -2.96187200  | -2.00997000 | -3.86355100 |
| H  | 0.43230800  | 0.86219700  | -0.15959900 | H                         | -2.25989900  | -2.84035400 | -3.77227600 |
| H  | -1.72212000 | 4.50616600  | 0.62206300  | H                         | -2.86699900  | -1.41761600 | -2.94841700 |
| H  | -0.16743000 | 2.72117000  | 1.37368600  | C                         | -3.51391500  | 1.10236800  | -4.07331200 |
| C  | -5.28880700 | 1.91809500  | 0.37014200  | C                         | -4.46020000  | 1.11423200  | -3.16740300 |
| H  | -6.05455700 | 2.68136000  | 0.19130300  | C                         | -5.42351200  | 1.25639100  | -2.29230400 |
| H  | -5.41839200 | 1.54367500  | 1.38972900  | H                         | -6.29068500  | 1.83344400  | -2.62550300 |
| H  | -4.30825200 | 2.39531600  | 0.29116700  | C                         | -5.49841800  | 0.75130700  | -0.85736300 |
| C  | -4.29678800 | -0.27358600 | -0.40025400 | C                         | -6.78552600  | -0.13572400 | -0.75972900 |
| H  | -4.37632700 | -1.11083400 | -1.10048100 | H                         | -7.64280700  | 0.44810100  | -1.12305000 |
| H  | -3.31015400 | 0.18344300  | -0.51963300 | H                         | -6.67286500  | -0.98144300 | -1.45006600 |
| H  | -4.37063300 | -0.67802400 | 0.61282000  | C                         | -7.07358800  | -0.63414000 | 0.58511500  |
| Rh | -5.12641400 | -4.48604000 | -3.55576600 | C                         | -7.30123800  | -1.04022800 | 1.70285000  |
| Cl | -4.06887700 | -5.55748700 | -5.43099900 | C                         | -7.60723300  | -1.55758400 | 3.03787300  |
| C  | -5.94708700 | -3.77470800 | -2.05567700 | C                         | -8.82595900  | -2.50447400 | 3.06080100  |
| O  | -6.47063000 | -3.36092900 | -1.11216500 | H                         | -7.78792500  | -0.71886200 | 3.72468500  |
| C  | -5.80567100 | -7.54968000 | -3.21189300 | H                         | -6.73007100  | -2.08823500 | 3.43336700  |
| C  | -5.23041300 | -8.91658300 | -2.83659500 | C                         | -9.13035100  | -3.04115900 | 4.46419300  |
| C  | -3.82543800 | -8.03254300 | -1.15581100 | H                         | -9.70017900  | -1.97018000 | 2.66825000  |
| C  | -3.71854500 | -6.89628200 | -2.17825900 | H                         | -8.64042200  | -3.33975000 | 2.37425900  |
| O  | -4.88052000 | -8.94310600 | -1.46404000 | C                         | -10.33892300 | -3.98201700 | 4.49561900  |
| O  | -5.04825000 | -6.48494000 | -2.56203600 | H                         | -8.24645600  | -3.56672600 | 4.85078000  |

|    |              |             |             |                           |              |             |             |
|----|--------------|-------------|-------------|---------------------------|--------------|-------------|-------------|
| H  | -9.30412300  | -2.19713800 | 5.14569800  | C                         | -5.17024200  | -3.97262600 | -1.66810300 |
| H  | -10.53198300 | -4.35088500 | 5.50814900  | O                         | -5.29317200  | -3.66645800 | -0.56144200 |
| H  | -11.24560100 | -3.47411000 | 4.14784200  | C                         | -6.18897000  | -7.40798800 | -3.14375200 |
| H  | -10.17957100 | -4.85221100 | 3.84891000  | C                         | -5.88883000  | -8.90988400 | -3.09797000 |
| C  | -4.33812600  | -2.53119300 | -3.99676000 | C                         | -3.75531900  | -8.61879500 | -2.13298800 |
| C  | -5.55419300  | -2.60189800 | -4.26991000 | C                         | -3.77879500  | -7.37176900 | -3.02489400 |
| C  | -6.88772400  | -2.30519300 | -4.81128700 | O                         | -5.04772200  | -9.20846300 | -1.99817800 |
| H  | -7.66381900  | -2.41496100 | -4.04764400 | O                         | -5.00209900  | -6.64831900 | -2.77178500 |
| H  | -6.91581500  | -1.27724500 | -5.19063200 | H                         | -3.03731400  | -9.34308300 | -2.55086700 |
| H  | -7.11376300  | -2.99051500 | -5.63355800 | H                         | -3.43137800  | -8.36092300 | -1.11996200 |
| C  | -2.64063000  | -1.95152300 | -6.37007300 | H                         | -2.96012600  | -6.69599300 | -2.77107400 |
| O  | -3.33658900  | -1.65182900 | -7.31314200 | H                         | -3.71047200  | -7.60003200 | -4.09273000 |
| O  | -1.87706600  | -3.05334600 | -6.30353600 | H                         | -6.82013800  | -9.46430300 | -2.95280400 |
| C  | -1.04542600  | -0.75255000 | -4.84845600 | H                         | -5.44484000  | -9.25120200 | -4.04514300 |
| O  | -0.50131400  | -0.73607900 | -3.76192000 | H                         | -6.51120300  | -7.09861000 | -4.14300100 |
| O  | -0.45179900  | -0.43628900 | -6.00185900 | H                         | -6.94230800  | -7.13247600 | -2.40150100 |
| C  | -1.94788400  | -3.93056800 | -7.44763300 | <b>INT-1a<sup>3</sup></b> |              |             |             |
| H  | -1.74764600  | -3.37120400 | -8.36383100 | C                         | 0.07343900   | -3.07350000 | -5.52559000 |
| H  | -1.18119000  | -4.68654700 | -7.27941500 | C                         | -1.21065300  | -2.28374500 | -5.92701800 |
| H  | -2.93589900  | -4.39175600 | -7.49277100 | H                         | -0.88845600  | -1.43585700 | -6.53398200 |
| C  | 0.89408000   | 0.07001600  | -5.90682100 | H                         | -1.77389200  | -2.94869600 | -6.58596100 |
| H  | 1.23707500   | 0.17383400  | -6.93562400 | C                         | -0.26852000  | -4.49884900 | -4.98828400 |
| H  | 0.87786400   | 1.03879800  | -5.40572800 | H                         | 0.64031600   | -4.94485700 | -4.57236100 |
| H  | 1.52550800   | -0.63052900 | -5.35613300 | H                         | -0.98498800  | -4.41570600 | -4.16663000 |
| S  | -2.41336200  | 2.57435400  | -4.09262100 | C                         | -2.17842800  | -1.76049700 | -4.87465600 |
| O  | -1.24172500  | 2.20754300  | -4.91036600 | C                         | -3.31342200  | -2.32959500 | -4.48519800 |
| O  | -3.21966600  | 3.75028400  | -4.45894300 | C                         | -4.63777500  | -2.21324700 | -4.03922900 |
| C  | -1.86526000  | 2.80899300  | -2.39285800 | H                         | -5.26964300  | -1.73451500 | -4.79001800 |
| C  | -0.91192900  | 1.94513500  | -1.84655700 | C                         | -5.29944200  | -2.11916600 | -2.65172500 |
| C  | -2.37338800  | 3.89354400  | -1.67679900 | C                         | -6.39144300  | -3.23795000 | -2.54607300 |
| C  | -0.47496400  | 2.17449900  | -0.54117500 | H                         | -7.00510000  | -3.21904300 | -3.45791400 |
| H  | -0.52311400  | 1.11402100  | -2.42610700 | H                         | -5.88230900  | -4.20760200 | -2.52478300 |
| C  | -1.92090100  | 4.11296800  | -0.37413800 | C                         | -7.26235600  | -3.11668300 | -1.37606800 |
| H  | -3.09569800  | 4.55143700  | -2.14703200 | C                         | -7.97956700  | -3.02122500 | -0.40492300 |
| C  | -0.97702000  | 3.25335100  | 0.19236500  | C                         | -8.86369400  | -2.93299000 | 0.75887000  |
| H  | 0.26455700   | 1.51292000  | -0.10015700 | C                         | -10.08533500 | -3.87252300 | 0.67263000  |
| H  | -2.30151100  | 4.95693000  | 0.19338700  | H                         | -9.21285900  | -1.89756900 | 0.87701700  |
| H  | -0.62746700  | 3.42704200  | 1.20601400  | H                         | -8.29379100  | -3.16431700 | 1.66960000  |
| C  | -5.64169800  | 1.98311100  | 0.06335800  | C                         | -11.00000100 | -3.76656400 | 1.89816500  |
| H  | -6.50236100  | 2.59772900  | -0.22410600 | H                         | -10.65249600 | -3.63767600 | -0.23684600 |
| H  | -5.78845900  | 1.66078500  | 1.09827900  | H                         | -9.73294300  | -4.90528300 | 0.55851300  |
| H  | -4.74528400  | 2.60777100  | 0.01295700  | C                         | -12.21735200 | -4.69327800 | 1.81888900  |
| C  | -4.25939400  | -0.06294700 | -0.46273200 | H                         | -10.42177400 | -3.99707100 | 2.80334600  |
| H  | -4.15395600  | -0.95049900 | -1.09336400 | H                         | -11.33752000 | -2.72705200 | 2.00996500  |
| H  | -3.34886000  | 0.53607100  | -0.55404400 | H                         | -12.85207600 | -4.59613000 | 2.70561100  |
| H  | -4.34962200  | -0.40166300 | 0.57267600  | H                         | -12.83321700 | -4.46357700 | 0.94195800  |
| Rh | -4.99356000  | -4.51854000 | -3.43410700 | H                         | -11.91196500 | -5.74293800 | 1.74169300  |
| Cl | -4.89755300  | -5.38024700 | -5.67785400 | C                         | -0.78023100  | -5.34987700 | -6.06866900 |

|    |             |             |             |                           |              |             |              |
|----|-------------|-------------|-------------|---------------------------|--------------|-------------|--------------|
| C  | -1.09905600 | -5.97301700 | -7.06048800 | H                         | -6.60735700  | -6.94746700 | -4.66046000  |
| C  | 0.93738600  | -3.21978200 | -6.79449800 | H                         | -7.39705800  | -8.07226100 | -6.62660400  |
| O  | 0.65900200  | -2.79920200 | -7.89446500 | H                         | -6.51667100  | -6.98621300 | -7.72928000  |
| O  | 2.06065800  | -3.91289200 | -6.51890200 | H                         | -4.01675600  | -7.49754500 | -3.99970200  |
| C  | 0.87056100  | -2.30427900 | -4.47008100 | H                         | -3.08362700  | -7.32056800 | -5.50029900  |
| O  | 0.73738300  | -2.45842800 | -3.27200900 | H                         | -4.01821000  | -9.50259800 | -5.83208200  |
| O  | 1.70731500  | -1.42332400 | -5.03080900 | H                         | -5.51089900  | -9.12578800 | -4.96108800  |
| C  | 2.95725100  | -4.09890500 | -7.62570100 | C                         | -1.37696600  | -6.68681700 | -8.32465200  |
| H  | 3.27209000  | -3.13304600 | -8.02814600 | C                         | -1.21529100  | -8.21087000 | -8.11927900  |
| H  | 3.81082700  | -4.64470100 | -7.22392700 | C                         | -2.81041200  | -6.37762800 | -8.81576300  |
| H  | 2.47300800  | -4.67358800 | -8.41890000 | C                         | -0.35487500  | -6.19971800 | -9.38207300  |
| C  | 2.39341400  | -0.52809300 | -4.13655600 | H                         | -0.21235200  | -8.45447300 | -7.75632500  |
| H  | 3.15149000  | -0.03422400 | -4.74357700 | H                         | -1.94258200  | -8.59246200 | -7.39647600  |
| H  | 1.68416800  | 0.20504000  | -3.74792800 | H                         | -1.37608100  | -8.73518100 | -9.06751000  |
| H  | 2.85161000  | -1.08358900 | -3.31588000 | H                         | -2.95317800  | -5.30085400 | -8.94773300  |
| S  | -2.01268700 | 0.04725900  | -4.54639800 | H                         | -2.98418700  | -6.86479300 | -9.78178700  |
| O  | -0.67187000 | 0.42474200  | -5.03595100 | H                         | -3.56049200  | -6.74880500 | -8.11224300  |
| O  | -3.20842600 | 0.70921300  | -5.10416300 | H                         | -0.55636200  | -6.67772900 | -10.34724300 |
| C  | -2.03460400 | 0.36174800  | -2.76722600 | H                         | -0.40886400  | -5.11497300 | -9.50872700  |
| C  | -1.16535300 | -0.30182900 | -1.89793600 | H                         | 0.66566100   | -6.45557400 | -9.07986200  |
| C  | -2.86580400 | 1.39287000  | -2.32303400 | <b>INT-1b<sup>3</sup></b> |              |             |              |
| C  | -1.15406100 | 0.06723000  | -0.55199200 | C                         | 0.15559100   | -2.87208200 | -5.60556300  |
| H  | -0.52012600 | -1.09848100 | -2.25022200 | C                         | -1.13133900  | -2.07808800 | -5.97869300  |
| C  | -2.83601000 | 1.75579600  | -0.97568000 | H                         | -0.81237900  | -1.18764600 | -6.52308700  |
| H  | -3.51663000 | 1.89593700  | -3.02944500 | H                         | -1.67459000  | -2.70514900 | -6.68828500  |
| C  | -1.98424700 | 1.09211300  | -0.09094500 | C                         | -0.16573700  | -4.25711200 | -4.97275900  |
| H  | -0.49303500 | -0.45109600 | 0.13597500  | H                         | 0.77418100   | -4.73185800 | -4.67450600  |
| H  | -3.47904500 | 2.55541300  | -0.62035200 | H                         | -0.75183900  | -4.11548700 | -4.06152800  |
| H  | -1.96684500 | 1.37288400  | 0.95818200  | C                         | -2.11965300  | -1.64023800 | -4.90702300  |
| C  | -6.00062900 | -0.73664400 | -2.64060600 | C                         | -3.20806000  | -2.29846800 | -4.52113900  |
| H  | -6.76274600 | -0.66581700 | -3.42518000 | C                         | -4.54428100  | -2.28078700 | -4.08180400  |
| H  | -6.49556700 | -0.59041300 | -1.67701100 | H                         | -5.19801600  | -1.84847200 | -4.84210900  |
| H  | -5.28024800 | 0.07035000  | -2.79143400 | C                         | -5.22713700  | -2.20212800 | -2.70405400  |
| C  | -4.32785300 | -2.20709500 | -1.46733000 | C                         | -6.26372700  | -3.37204200 | -2.59920000  |
| H  | -3.75770400 | -3.13578500 | -1.48136300 | H                         | -6.86047400  | -3.39849900 | -3.52192600  |
| H  | -3.63175500 | -1.36793100 | -1.47256600 | H                         | -5.70664200  | -4.31428300 | -2.55351300  |
| H  | -4.90101500 | -2.16578300 | -0.53619400 | C                         | -7.16237700  | -3.27443500 | -1.44799900  |
| Rh | -4.12588300 | -4.16868800 | -4.90722200 | C                         | -7.90341600  | -3.19332400 | -0.49357900  |
| Cl | -3.25605100 | -5.14804600 | -2.91488000 | C                         | -8.81442600  | -3.11691900 | 0.65011300   |
| C  | -4.71581900 | -3.57020500 | -6.57742300 | C                         | -10.03073300 | -4.05979400 | 0.53179100   |
| O  | -5.06482100 | -3.23700600 | -7.62345300 | H                         | -9.17005300  | -2.08340100 | 0.76615000   |
| C  | -4.76388700 | -8.72146800 | -5.66165000 | H                         | -8.26451100  | -3.35097000 | 1.57241600   |
| C  | -4.08392100 | -7.46742900 | -5.09130200 | C                         | -10.97475700 | -3.95823700 | 1.73511400   |
| C  | -6.23177900 | -6.55000300 | -5.61197300 | H                         | -10.57641700 | -3.82464700 | -0.39066600  |
| C  | -6.45188400 | -7.52639300 | -6.78036400 | H                         | -9.67298100  | -5.09143900 | 0.42422400   |
| O  | -4.82679200 | -6.28352200 | -5.49462300 | C                         | -12.18609300 | -4.88994500 | 1.62765400   |
| O  | -5.35886800 | -8.42999500 | -6.91658200 | H                         | -10.41704600 | -4.18614400 | 2.65374800   |
| H  | -6.73040700 | -5.59727100 | -5.79728200 | H                         | -11.31910300 | -2.92012600 | 1.83878700   |

|    |              |             |             |                           |             |             |              |
|----|--------------|-------------|-------------|---------------------------|-------------|-------------|--------------|
| H  | -12.84218400 | -4.79484000 | 2.49894900  | O                         | -4.82038500 | -3.35053200 | -7.68009600  |
| H  | -12.78208900 | -4.66349200 | 0.73622400  | C                         | -4.44598000 | -8.80036300 | -5.52293100  |
| H  | -11.87484500 | -5.93847400 | 1.55858900  | C                         | -3.91978100 | -7.51956100 | -4.85511400  |
| C  | -0.87252600  | -5.12066300 | -5.92483500 | C                         | -5.90079500 | -6.64652300 | -5.86213600  |
| C  | -1.37090800  | -5.78064000 | -6.81314200 | C                         | -5.85589400 | -7.65833900 | -7.02072600  |
| C  | -1.92097100  | -6.57506100 | -7.91083000 | O                         | -4.55926600 | -6.35991500 | -5.45008500  |
| H  | -1.16645200  | -7.26424100 | -8.30696600 | O                         | -4.75151700 | -8.55035500 | -6.88750200  |
| H  | -2.78613600  | -7.16946800 | -7.59896700 | H                         | -6.35445000 | -5.70626900 | -6.17906100  |
| H  | -2.23695300  | -5.92667100 | -8.73618000 | H                         | -6.47355000 | -7.02368500 | -5.00476500  |
| C  | 0.94424200   | -3.09371400 | -6.91128200 | H                         | -6.80619400 | -8.21466000 | -7.06162300  |
| O  | 0.59871400   | -2.74314000 | -8.01586700 | H                         | -5.71557700 | -7.14592400 | -7.97685100  |
| O  | 2.08555200   | -3.76911200 | -6.66173400 | H                         | -4.09691400 | -7.51819000 | -3.77497800  |
| C  | 1.01655800   | -2.04970800 | -4.64340400 | H                         | -2.85373000 | -7.37499500 | -5.03129400  |
| O  | 1.01659000   | -2.18342200 | -3.43596300 | H                         | -3.67513300 | -9.57499000 | -5.50232900  |
| O  | 1.73888700   | -1.13645300 | -5.30355800 | H                         | -5.32747000 | -9.19650100 | -4.99583400  |
| C  | 2.90563800   | -4.03568300 | -7.81120000 | <b>INT-1a<sup>4</sup></b> |             |             |              |
| H  | 3.20702800   | -3.10098400 | -8.29021100 | C                         | 1.93043600  | -0.96094100 | -9.43719600  |
| H  | 3.77588300   | -4.57216000 | -7.43355500 | C                         | 0.77404000  | 0.02321000  | -9.79309900  |
| H  | 2.36166500   | -4.64659100 | -8.53570700 | H                         | 1.16642800  | 0.76487600  | -10.49186400 |
| C  | 2.44920500   | -0.17532500 | -4.49990600 | H                         | 0.02204900  | -0.55813700 | -10.32997100 |
| H  | 3.10236900   | 0.35600100  | -5.19132900 | C                         | 1.46926600  | -2.09124300 | -8.47235500  |
| H  | 1.73273500   | 0.51438000  | -4.04973700 | H                         | 2.34054500  | -2.70116400 | -8.21456100  |
| H  | 3.02936600   | -0.67845900 | -3.72388000 | H                         | 1.13875200  | -1.61796400 | -7.54447600  |
| S  | -2.05515500  | 0.15933700  | -4.51841600 | C                         | 0.08692500  | 0.73204100  | -8.63842300  |
| O  | -0.76102300  | 0.64149200  | -5.04286500 | C                         | -0.95267100 | 0.30492600  | -7.96598600  |
| O  | -3.31128000  | 0.77084800  | -4.99580300 | C                         | -2.04154200 | -0.04673900 | -7.33102900  |
| C  | -2.01730400  | 0.38653800  | -2.72747500 | H                         | -2.98727600 | 0.20757100  | -7.81655000  |
| C  | -1.09636200  | -0.29413900 | -1.92773200 | C                         | -2.17814300 | -0.78666500 | -6.00406300  |
| C  | -2.86650500  | 1.36118100  | -2.19825100 | C                         | -2.75421500 | -2.19806400 | -6.36249500  |
| C  | -1.04985000  | -0.00141400 | -0.56403200 | H                         | -3.68793900 | -2.08354700 | -6.92752500  |
| H  | -0.43627800  | -1.04537100 | -2.34609700 | H                         | -2.04523400 | -2.70584100 | -7.02696500  |
| C  | -2.80094700  | 1.64874200  | -0.83421600 | C                         | -3.04209500 | -3.05201600 | -5.19484700  |
| H  | -3.56071500  | 1.87706100  | -2.85211200 | C                         | -3.22929200 | -3.42343100 | -4.01434500  |
| C  | -1.89704700  | 0.96612900  | -0.01801900 | C                         | -3.28499400 | -3.41594300 | -2.53967900  |
| H  | -0.34788300  | -0.53365500 | 0.07059900  | C                         | -4.69411300 | -3.63910400 | -1.95676400  |
| H  | -3.45767800  | 2.40334900  | -0.41181600 | H                         | -2.89305500 | -2.44545400 | -2.20162500  |
| H  | -1.85257800  | 1.18741500  | 1.04446700  | H                         | -2.59957600 | -4.17856600 | -2.14646500  |
| C  | -5.99231400  | -0.85337700 | -2.72232800 | C                         | -4.70556500 | -3.58173100 | -0.42493100  |
| H  | -6.75319300  | -0.83390400 | -3.51104500 | H                         | -5.37638200 | -2.88817300 | -2.37083400  |
| H  | -6.49794200  | -0.71081000 | -1.76373000 | H                         | -5.07075000 | -4.60900400 | -2.30134200  |
| H  | -5.30947700  | -0.01722600 | -2.88973900 | C                         | -6.09863500 | -3.81779200 | 0.16712800   |
| C  | -4.27310200  | -2.22633800 | -1.50234700 | H                         | -4.00644900 | -4.33023800 | -0.02634900  |
| H  | -3.65938900  | -3.12643300 | -1.49321400 | H                         | -4.32664000 | -2.60527100 | -0.09232200  |
| H  | -3.61828400  | -1.35458000 | -1.50712900 | H                         | -6.08058200 | -3.77170100 | 1.26084500   |
| H  | -4.86493400  | -2.19953500 | -0.58233300 | H                         | -6.81153600 | -3.06541500 | -0.18776500  |
| Rh | -3.86544900  | -4.18664800 | -4.94055100 | H                         | -6.48789700 | -4.80099300 | -0.11974300  |
| Cl | -2.99202900  | -5.08338600 | -2.90696700 | C                         | 0.42053500  | -2.93465300 | -9.04703700  |
| C  | -4.46393000  | -3.64368800 | -6.62391000 | C                         | -0.41952000 | -3.62290200 | -9.58493500  |

|    |             |             |              |                           |             |              |              |
|----|-------------|-------------|--------------|---------------------------|-------------|--------------|--------------|
| C  | 2.41952500  | -1.59058800 | -10.75350900 | H                         | -5.25936400 | -9.77752700  | -6.63946600  |
| O  | 1.95944700  | -1.37440000 | -11.85109000 | H                         | -4.79457600 | -10.23306900 | -4.99590200  |
| O  | 3.42822000  | -2.45480100 | -10.51920300 | H                         | -5.71371800 | -7.72119200  | -7.62879100  |
| C  | 3.08779500  | -0.20063500 | -8.77328200  | H                         | -6.27321800 | -6.16861800  | -6.94841400  |
| O  | 3.26177500  | -0.14145400 | -7.57254100  | H                         | -7.36784300 | -7.18368300  | -5.09748400  |
| O  | 3.86179000  | 0.39690200  | -9.68525000  | H                         | -7.77186700 | -8.26543100  | -6.45544900  |
| C  | 3.95791200  | -3.11127000 | -11.68329300 | C                         | -1.41027300 | -4.46566500  | -10.28171000 |
| H  | 4.35523200  | -2.37691800 | -12.38805900 | C                         | -1.78423100 | -5.67414000  | -9.39172200  |
| H  | 4.75187700  | -3.76216100 | -11.31785200 | C                         | -2.67729900 | -3.63325500  | -10.58792500 |
| H  | 3.17903200  | -3.69506900 | -12.17963600 | C                         | -0.78907300 | -4.96793100  | -11.60748800 |
| C  | 4.89408200  | 1.26279500  | -9.17406400  | H                         | -0.90021400 | -6.27300200  | -9.15259500  |
| H  | 5.48127600  | 1.55806900  | -10.04302800 | H                         | -2.23915000 | -5.34482400  | -8.45225600  |
| H  | 4.43169800  | 2.13366900  | -8.70725800  | H                         | -2.50352500 | -6.31372100  | -9.91564400  |
| H  | 5.51366500  | 0.72982100  | -8.44969300  | H                         | -2.43722900 | -2.77261600  | -11.21927500 |
| S  | 0.60342300  | 2.46578700  | -8.33665000  | H                         | -3.41341800 | -4.25041200  | -11.11477300 |
| O  | 1.99957900  | 2.57187100  | -8.80171500  | H                         | -3.13823200 | -3.26410100  | -9.66709800  |
| O  | -0.42255800 | 3.36085000  | -8.89628100  | H                         | -1.51394400 | -5.58140700  | -12.15409700 |
| C  | 0.58775500  | 2.67870500  | -6.54880200  | H                         | -0.49660200 | -4.12752200  | -12.24377900 |
| C  | 1.63295200  | 2.15555100  | -5.78260000  | H                         | 0.10058300  | -5.57579600  | -11.41611800 |
| C  | -0.45541100 | 3.40589200  | -5.97409000  | <b>INT-1b<sup>4</sup></b> |             |              |              |
| C  | 1.61655500  | 2.36277100  | -4.40268000  | C                         | 1.50986500  | -1.34195100  | -9.57468300  |
| H  | 2.43335800  | 1.59497900  | -6.25423800  | C                         | 0.64148600  | -0.05575300  | -9.73411700  |
| C  | -0.45608500 | 3.60641500  | -4.59237500  | H                         | 1.14884000  | 0.60672100   | -10.43852900 |
| H  | -1.23444000 | 3.81423500  | -6.60823800  | H                         | -0.29411800 | -0.36632500  | -10.20310100 |
| C  | 0.57628100  | 3.08423000  | -3.80959600  | C                         | 0.88818200  | -2.36732800  | -8.58462200  |
| H  | 2.42049200  | 1.96384700  | -3.79139000  | H                         | 1.57773000  | -3.21206400  | -8.49234100  |
| H  | -1.25751400 | 4.17550600  | -4.13078500  | H                         | 0.85379100  | -1.89247900  | -7.60035900  |
| H  | 0.57359200  | 3.24406600  | -2.73516600  | C                         | 0.29852100  | 0.71835300   | -8.47272400  |
| C  | -3.17853000 | 0.00139200  | -5.13221900  | C                         | -0.76660200 | 0.55637200   | -7.72795700  |
| H  | -4.14592400 | 0.10853400  | -5.63402100  | C                         | -1.85990500 | 0.47689300   | -7.01356400  |
| H  | -3.35194700 | -0.51214500 | -4.18242800  | H                         | -2.72111300 | 1.03878900   | -7.38385100  |
| H  | -2.79062400 | 1.00163400  | -4.91608900  | C                         | -2.11143700 | -0.34080800  | -5.74961200  |
| C  | -0.83476800 | -0.92659200 | -5.27459800  | C                         | -2.99679200 | -1.54934600  | -6.20455700  |
| H  | -0.12415600 | -1.52056600 | -5.85624400  | H                         | -3.89104400 | -1.17304400  | -6.71940900  |
| H  | -0.38612500 | 0.05171300  | -5.08418500  | H                         | -2.43785400 | -2.12932000  | -6.94369200  |
| H  | -0.97633000 | -1.43052300 | -4.31437800  | C                         | -3.45844600 | -2.43692200  | -5.11603600  |
| Rh | -3.83672100 | -5.04309100 | -5.31105200  | C                         | -4.08020200 | -2.83254100  | -4.10335200  |
| Cl | -6.00291500 | -4.05317300 | -5.59807800  | C                         | -4.91913400 | -2.81929200  | -2.88935300  |
| C  | -2.13517800 | -5.77180900 | -5.16024500  | C                         | -6.17133800 | -3.71359300  | -2.97753300  |
| O  | -1.06750400 | -6.20549100 | -5.07223300  | H                         | -5.21867900 | -1.77681800  | -2.70866400  |
| C  | -6.95257600 | -7.88723700 | -5.82430900  | H                         | -4.31292800 | -3.12261500  | -2.02513000  |
| C  | -5.92990000 | -7.17303300 | -6.70371100  | C                         | -7.02935800 | -3.63965000  | -1.70938500  |
| C  | -4.10918300 | -8.26840100 | -5.55454700  | H                         | -6.76106600 | -3.41957600  | -3.85312500  |
| C  | -5.14087400 | -9.39836500 | -5.61253800  | H                         | -5.85519800 | -4.74719700  | -3.16037500  |
| O  | -4.69886000 | -7.01133200 | -5.96903700  | C                         | -8.26988600 | -4.53576600  | -1.78014700  |
| O  | -6.36978200 | -8.96018400 | -5.07214200  | H                         | -6.42070100 | -3.92423600  | -0.83967300  |
| H  | -3.77293000 | -8.12013500 | -4.52582500  | H                         | -7.33827400 | -2.59934800  | -1.53658400  |
| H  | -3.24116200 | -8.48966900 | -6.19017400  | H                         | -8.86571400 | -4.46532100  | -0.86438900  |

|    |             |             |              |                           |             |             |              |
|----|-------------|-------------|--------------|---------------------------|-------------|-------------|--------------|
| H  | -8.91353700 | -4.25374700 | -2.62064000  | C                         | -3.83123200 | -8.72676600 | -6.18272500  |
| H  | -7.99072000 | -5.58634800 | -1.91744100  | C                         | -3.12628000 | -7.45187300 | -6.64247000  |
| C  | -0.43566400 | -2.84401200 | -8.98716600  | C                         | -1.72460600 | -7.44624400 | -4.68339800  |
| C  | -1.52162100 | -3.24397800 | -9.34562600  | C                         | -1.82115600 | -8.95082900 | -4.95966100  |
| C  | -2.83425100 | -3.72492800 | -9.77266800  | O                         | -2.68517600 | -6.71458600 | -5.48333600  |
| H  | -2.74128500 | -4.61735000 | -10.40202900 | O                         | -3.17564100 | -9.33706700 | -5.06477200  |
| H  | -3.46439600 | -3.98173600 | -8.91279800  | H                         | -1.98079600 | -7.23619700 | -3.64255400  |
| H  | -3.35914200 | -2.96185800 | -10.35831700 | H                         | -0.71291900 | -7.07133300 | -4.88936500  |
| C  | 1.63046100  | -1.98562000 | -10.96787200 | H                         | -1.24913100 | -9.22823600 | -5.85856700  |
| O  | 1.12203800  | -1.56897000 | -11.98275600 | H                         | -1.39093400 | -9.50076700 | -4.11754800  |
| O  | 2.37408300  | -3.10999900 | -10.90747500 | H                         | -2.25752800 | -7.65841600 | -7.27967000  |
| C  | 2.91446500  | -0.97940800 | -9.06790700  | H                         | -3.81491700 | -6.79723600 | -7.17556200  |
| O  | 3.27016900  | -1.08603200 | -7.91123500  | H                         | -4.84898900 | -8.49549600 | -5.85576000  |
| O  | 3.68485000  | -0.52243400 | -10.06063800 | H                         | -3.88804100 | -9.43208700 | -7.02687700  |
| C  | 2.55328600  | -3.79523700 | -12.15850400 | <b>INT-1a<sup>5</sup></b> |             |             |              |
| H  | 3.06244000  | -3.14904300 | -12.87763300 | C                         | 1.05789000  | -2.08054000 | -9.56466800  |
| H  | 3.16198600  | -4.66986200 | -11.92999700 | C                         | 0.26726700  | -0.74310900 | -9.69807000  |
| H  | 1.58741900  | -4.09502600 | -12.57187200 | H                         | 0.75771100  | -0.13758200 | -10.46271700 |
| C  | 4.97593300  | -0.00959000 | -9.67734200  | H                         | -0.72378200 | -0.99978300 | -10.07735400 |
| H  | 5.48349100  | 0.22496200  | -10.61243600 | C                         | 0.39587100  | -3.05988000 | -8.55229500  |
| H  | 4.83959700  | 0.89034400  | -9.07600300  | H                         | 1.02662200  | -3.95072600 | -8.47280700  |
| H  | 5.53173300  | -0.76098900 | -9.11220200  | H                         | 0.41406300  | -2.57982300 | -7.57086300  |
| S  | 1.32642500  | 2.19514600  | -8.11520200  | C                         | 0.09553500  | 0.08299400  | -8.43475300  |
| O  | 2.63090700  | 1.96209500  | -8.76369700  | C                         | -0.85605200 | -0.03692000 | -7.54354100  |
| O  | 0.54714500  | 3.39715400  | -8.45411500  | C                         | -1.84211200 | -0.07587000 | -6.68364900  |
| C  | 1.57240000  | 2.19948900  | -6.33119000  | H                         | -2.74488000 | 0.47686600  | -6.95567300  |
| C  | 2.48803200  | 1.31291100  | -5.75817300  | C                         | -1.91414500 | -0.81204700 | -5.34889500  |
| C  | 0.86150800  | 3.12406600  | -5.56474800  | C                         | -2.90885400 | -2.00338000 | -5.57752000  |
| C  | 2.68102700  | 1.35499200  | -4.37682000  | H                         | -3.87266200 | -1.61986200 | -5.93262200  |
| H  | 3.02876100  | 0.60431200  | -6.37692200  | H                         | -2.51234400 | -2.64983600 | -6.36870800  |
| C  | 1.06790400  | 3.15506800  | -4.18438000  | C                         | -3.16699700 | -2.79393700 | -4.36366500  |
| H  | 0.17638600  | 3.80773300  | -6.05355600  | C                         | -3.27730600 | -3.26808800 | -3.23434000  |
| C  | 1.97357100  | 2.27119500  | -3.59291100  | C                         | -3.28052000 | -3.64687900 | -1.81316000  |
| H  | 3.38821600  | 0.67360900  | -3.91349200  | C                         | -4.59296400 | -3.30453200 | -1.07806700  |
| H  | 0.52740300  | 3.87275800  | -3.57440100  | H                         | -2.43912600 | -3.12418500 | -1.33635600  |
| H  | 2.13258000  | 2.29908000  | -2.51870400  | H                         | -3.06767300 | -4.71862700 | -1.71769900  |
| C  | -2.87827400 | 0.54848100  | -4.75045300  | C                         | -4.54803000 | -3.70098200 | 0.40202300   |
| H  | -3.81369300 | 0.92104000  | -5.18266000  | H                         | -4.78611100 | -2.22977500 | -1.17551400  |
| H  | -3.12305700 | -0.01662300 | -3.84590800  | H                         | -5.42489100 | -3.80978500 | -1.58108100  |
| H  | -2.27111000 | 1.41101500  | -4.45865800  | C                         | -5.84420500 | -3.36140100 | 1.14446000   |
| C  | -0.80583200 | -0.83823800 | -5.11402000  | H                         | -4.34992400 | -4.77870300 | 0.48401200   |
| H  | -0.25551200 | -1.49429700 | -5.79399700  | H                         | -3.70214200 | -3.19779500 | 0.89079800   |
| H  | -0.15515600 | -0.00067200 | -4.84958000  | H                         | -5.78794800 | -3.65665700 | 2.19699100   |
| H  | -1.01854700 | -1.40524000 | -4.20329800  | H                         | -6.05022700 | -2.28598600 | 1.10970500   |
| Rh | -3.19570300 | -4.56927700 | -5.03635100  | H                         | -6.70187000 | -3.87622300 | 0.69795100   |
| Cl | -5.02142400 | -4.72194400 | -6.59883200  | C                         | -0.96431300 | -3.43961400 | -8.93519400  |
| C  | -1.75225400 | -4.39533800 | -3.88697500  | C                         | -2.07483200 | -3.74052500 | -9.31640400  |
| O  | -0.85372000 | -4.25584600 | -3.17265900  | C                         | 1.08989000  | -2.73782200 | -10.95565700 |

|    |             |             |              |                           |             |             |              |
|----|-------------|-------------|--------------|---------------------------|-------------|-------------|--------------|
| O  | 0.57444800  | -2.29288700 | -11.95526500 | H                         | -3.91880900 | -2.08257100 | -10.46507900 |
| O  | 1.75498400  | -3.90994900 | -10.91053600 | H                         | -5.32065600 | -3.13944800 | -10.20740700 |
| C  | 2.49111700  | -1.79269300 | -9.09461800  | H                         | -4.44951500 | -2.46798400 | -8.81760300  |
| O  | 2.84498600  | -1.83856600 | -7.93313400  | H                         | -4.24105200 | -4.91942400 | -11.67212700 |
| O  | 3.28233100  | -1.46194500 | -10.11985100 | H                         | -2.80514800 | -3.90246900 | -11.91867200 |
| C  | 1.84271200  | -4.61591200 | -12.16015800 | H                         | -2.62686100 | -5.54751100 | -11.28472500 |
| H  | 2.36261200  | -4.00889400 | -12.90513400 | <b>INT-1b<sup>5</sup></b> |             |             |              |
| H  | 2.40391000  | -5.52494800 | -11.94518800 | C                         | 0.96821500  | -2.10196500 | -9.58327900  |
| H  | 0.84453900  | -4.85830300 | -12.53250900 | C                         | 0.24340900  | -0.72623300 | -9.70486200  |
| C  | 4.61089200  | -1.01613000 | -9.78322700  | H                         | 0.71649300  | -0.16753700 | -10.51490100 |
| H  | 5.13358900  | -0.91912700 | -10.73420700 | H                         | -0.78131200 | -0.93814400 | -10.01581400 |
| H  | 4.54654700  | -0.05067700 | -9.27917500  | C                         | 0.35105300  | -3.00558600 | -8.47750900  |
| H  | 5.10642500  | -1.74686600 | -9.14056600  | H                         | 0.93431700  | -3.93017300 | -8.42723500  |
| S  | 1.18678700  | 1.55007700  | -8.29352900  | H                         | 0.49642900  | -2.49864200 | -7.51967100  |
| O  | 2.42833800  | 1.21435600  | -9.01611000  | C                         | 0.18926800  | 0.14298800  | -8.46022100  |
| O  | 0.41489000  | 2.74103800  | -8.68323600  | C                         | -0.74202200 | 0.12752500  | -7.54018300  |
| C  | 1.57941100  | 1.70675500  | -6.54365500  | C                         | -1.70144600 | 0.19079600  | -6.65226500  |
| C  | 2.51850600  | 0.84610900  | -5.96871900  | H                         | -2.56520400 | 0.80664700  | -6.91417400  |
| C  | 0.96698200  | 2.72540000  | -5.81259200  | C                         | -1.79317800 | -0.52592800 | -5.30694700  |
| C  | 2.83739900  | 1.01258200  | -4.62051800  | C                         | -2.73321300 | -1.75678500 | -5.54649500  |
| H  | 2.97782600  | 0.06061400  | -6.55972300  | H                         | -3.68671000 | -1.43038400 | -5.97911900  |
| C  | 1.29786100  | 2.87972200  | -4.46497100  | H                         | -2.27214700 | -2.41191400 | -6.29208700  |
| H  | 0.26110100  | 3.38574100  | -6.30405400  | C                         | -3.04655400 | -2.51522100 | -4.32349600  |
| C  | 2.22920900  | 2.02444100  | -3.87143200  | C                         | -3.33430300 | -2.92635900 | -3.20087300  |
| H  | 3.56536700  | 0.35393700  | -4.15645400  | C                         | -3.66865400 | -3.19066900 | -1.79370800  |
| H  | 0.83488800  | 3.67140400  | -3.88352800  | C                         | -5.13274000 | -3.61900300 | -1.56407600  |
| H  | 2.48645800  | 2.14961100  | -2.82352500  | H                         | -3.46056100 | -2.26692500 | -1.23523700  |
| C  | -2.48196100 | 0.16813600  | -4.30166400  | H                         | -2.98971700 | -3.95228800 | -1.38999900  |
| H  | -3.46098600 | 0.55346900  | -4.60507500  | C                         | -5.44492000 | -3.83816900 | -0.07942300  |
| H  | -2.60260300 | -0.32661600 | -3.33357500  | H                         | -5.79820200 | -2.85542100 | -1.98293200  |
| H  | -1.80424500 | 1.01708800  | -4.17037900  | H                         | -5.32614600 | -4.53674200 | -2.13150800  |
| C  | -0.54400300 | -1.33316000 | -4.89336200  | C                         | -6.89497000 | -4.26820700 | 0.16331100   |
| H  | -0.12215000 | -2.04447100 | -5.60878800  | H                         | -4.76373100 | -4.59825100 | 0.32758400   |
| H  | 0.16629000  | -0.51128800 | -4.77595200  | H                         | -5.23824100 | -2.91394300 | 0.47790200   |
| H  | -0.63500100 | -1.84560100 | -3.93109900  | H                         | -7.09118600 | -4.41868400 | 1.22959200   |
| Rh | -4.71966100 | -4.54206000 | -4.67369100  | H                         | -7.59856500 | -3.51245900 | -0.20260600  |
| Cl | -6.38061300 | -2.83369100 | -4.72908200  | H                         | -7.12099000 | -5.20713200 | -0.35392600  |
| C  | -6.07760300 | -5.70102700 | -5.30575300  | C                         | -1.06164900 | -3.31468100 | -8.70334400  |
| O  | -6.92025500 | -6.37964400 | -5.67994700  | C                         | -2.22504400 | -3.56701100 | -8.92870600  |
| C  | -3.39003500 | -5.87253500 | -4.66697700  | C                         | -3.62794200 | -3.86918800 | -9.20633000  |
| O  | -2.56418700 | -6.67376300 | -4.66040800  | H                         | -3.73646500 | -4.86789200 | -9.64395100  |
| C  | -3.40913000 | -4.11469200 | -9.82327500  | H                         | -4.23327500 | -3.83608400 | -8.29340200  |
| C  | -4.02056100 | -5.21029400 | -8.91908600  | H                         | -4.04848100 | -3.14876300 | -9.91678000  |
| C  | -4.32900500 | -2.87127800 | -9.82735100  | C                         | 0.84184700  | -2.80716900 | -10.94577000 |
| C  | -3.25871000 | -4.65425200 | -11.26611900 | O                         | 0.27315300  | -2.36383500 | -11.91648600 |
| H  | -3.38240600 | -6.09902300 | -8.89374200  | O                         | 1.43821900  | -4.01613900 | -10.91031100 |
| H  | -4.14600700 | -4.84759300 | -7.89373300  | C                         | 2.45370800  | -1.88713800 | -9.25696900  |
| H  | -5.00487900 | -5.50293800 | -9.30086900  | O                         | 2.91708800  | -1.94336200 | -8.13521800  |

|                           |             |             |              |   |              |             |             |
|---------------------------|-------------|-------------|--------------|---|--------------|-------------|-------------|
| O                         | 3.15873500  | -1.61195300 | -10.35883600 | H | -4.31246700  | -1.46447900 | -2.66117200 |
| C                         | 1.37513700  | -4.76863400 | -12.13419500 | C | -3.81800300  | -2.18832700 | -0.66082000 |
| H                         | 1.86171800  | -4.22038200 | -12.94439400 | C | -5.04177700  | -3.14468900 | -0.48798700 |
| H                         | 1.89943500  | -5.70232700 | -11.93217500 | H | -5.85803100  | -2.79395000 | -1.13472200 |
| H                         | 0.33572500  | -4.96215600 | -12.40951400 | H | -4.75820700  | -4.13433000 | -0.85927400 |
| C                         | 4.53601500  | -1.23817100 | -10.15753800 | C | -5.53212200  | -3.26869300 | 0.88527600  |
| H                         | 4.96804400  | -1.17525800 | -11.15571500 | C | -5.93818000  | -3.38640900 | 2.02025600  |
| H                         | 4.57353300  | -0.26819600 | -9.65944700  | C | -6.47349600  | -3.52249500 | 3.37648400  |
| H                         | 5.05128400  | -1.99159200 | -9.55802600  | C | -7.95385100  | -3.10159800 | 3.49244600  |
| S                         | 1.39587400  | 1.52350600  | -8.38597400  | H | -5.86979000  | -2.92077900 | 4.07011900  |
| O                         | 2.55621300  | 1.10412400  | -9.19418700  | H | -6.36465700  | -4.56395800 | 3.71021800  |
| O                         | 0.68954500  | 2.77256500  | -8.71334200  | C | -8.50518900  | -3.25639100 | 4.91471100  |
| C                         | 1.91507800  | 1.63353900  | -6.66537400  | H | -8.05427400  | -2.05928600 | 3.16512300  |
| C                         | 2.83859500  | 0.71393900  | -6.16124800  | H | -8.55016300  | -3.70235400 | 2.79450600  |
| C                         | 1.41026200  | 2.67465500  | -5.88473700  | C | -9.97404600  | -2.83854500 | 5.03461100  |
| C                         | 3.25165300  | 0.84282300  | -4.83467300  | H | -8.39356700  | -4.30117200 | 5.23542500  |
| H                         | 3.21827200  | -0.08580500 | -6.78841300  | H | -7.89613900  | -2.65926700 | 5.60724600  |
| C                         | 1.83470500  | 2.79077400  | -4.55988200  | H | -10.34068000 | -2.95797300 | 6.05916000  |
| H                         | 0.71458900  | 3.38191100  | -6.32252300  | H | -10.11137700 | -1.78870000 | 4.75193300  |
| C                         | 2.75158400  | 1.87585100  | -4.03652300  | H | -10.61237100 | -3.44251000 | 4.37995500  |
| H                         | 3.96907700  | 0.13743500  | -4.42622700  | C | -1.36096000  | -4.74525500 | -2.48211000 |
| H                         | 1.45594600  | 3.59921400  | -3.94161400  | C | -2.25876000  | -5.58196200 | -2.32670300 |
| H                         | 3.08204200  | 1.97111800  | -3.00613300  | C | 1.05246500   | -4.41847400 | -4.60950300 |
| C                         | -2.42319000 | 0.44690700  | -4.29044300  | O | 1.10063400   | -4.16420900 | -5.78717700 |
| H                         | -3.41434700 | 0.77949200  | -4.61742100  | O | 1.40611500   | -5.60898000 | -4.07804000 |
| H                         | -2.53278400 | -0.03142900 | -3.31257400  | C | 1.91664600   | -2.75116500 | -2.96973500 |
| H                         | -1.79065400 | 1.33112500  | -4.16606600  | O | 2.15254300   | -2.58629300 | -1.78796200 |
| C                         | -0.41808400 | -0.99191100 | -4.80614900  | O | 2.71961900   | -2.35296600 | -3.95686200 |
| H                         | 0.06818500  | -1.65837500 | -5.52413700  | C | 1.80173100   | -6.60335500 | -5.04281400 |
| H                         | 0.24407200  | -0.13877300 | -4.63924300  | H | 2.66881900   | -6.25921000 | -5.61129000 |
| H                         | -0.52328200 | -1.53497100 | -3.86207800  | H | 2.04938400   | -7.49226300 | -4.46280700 |
| Rh                        | -3.53425100 | -4.78480600 | -4.72619700  | H | 0.97859300   | -6.80402600 | -5.73199900 |
| Cl                        | -5.58492000 | -3.99253300 | -5.66036600  | C | 3.84508400   | -1.53952300 | -3.56800000 |
| C                         | -3.96973400 | -6.45091500 | -5.50963400  | H | 4.41788400   | -1.38504000 | -4.48132500 |
| O                         | -4.26107700 | -7.44756600 | -5.99213500  | H | 3.48153100   | -0.58779900 | -3.17513600 |
| C                         | -1.89286100 | -5.38593500 | -4.03561100  | H | 4.44500600   | -2.05130200 | -2.81277500 |
| O                         | -0.88137900 | -5.73528300 | -3.61251200  | S | -0.57607800  | 0.15863100  | -2.85797100 |
| <b>INT-1a<sup>6</sup></b> |             |             |              | O | 0.81863700   | 0.23118600  | -3.33747400 |
| C                         | 0.63290500  | -3.41637700 | -3.51421000  | O | -1.59764200  | 1.07283100  | -3.39698300 |
| C                         | -0.24273500 | -2.31529500 | -4.19927200  | C | -0.52128400  | 0.42745900  | -1.07416000 |
| H                         | 0.41388400  | -1.63785100 | -4.74330300  | C | 0.40355700   | -0.26142700 | -0.28358600 |
| H                         | -0.87995600 | -2.81927000 | -4.92782600  | C | -1.32630900  | 1.43865200  | -0.54656900 |
| C                         | -0.05391200 | -4.09086900 | -2.30036700  | C | 0.48808800   | 0.05222000  | 1.07356300  |
| H                         | 0.61563500  | -4.86823500 | -1.91950200  | H | 1.05393700   | -1.01549900 | -0.71415400 |
| H                         | -0.13689000 | -3.34542400 | -1.50773700  | C | -1.21927800  | 1.75032700  | 0.81042900  |
| C                         | -1.13125400 | -1.55721700 | -3.23489200  | H | -2.00710100  | 1.97234300  | -1.20050000 |
| C                         | -2.30097300 | -2.02681000 | -2.82976400  | C | -0.31966600  | 1.05384100  | 1.61925700  |
| C                         | -3.52907600 | -2.04132700 | -2.16585500  | H | 1.19763700   | -0.47855400 | 1.70111500  |



|                           |             |             |             |   |             |             |             |
|---------------------------|-------------|-------------|-------------|---|-------------|-------------|-------------|
| H                         | -1.83671200 | 2.53796000  | 1.23163000  | C | -6.71902300 | 1.05263400  | 1.83957100  |
| H                         | -0.24025300 | 1.29755400  | 2.67473400  | H | -4.62905200 | 0.53269700  | 2.10719200  |
| C                         | -4.22081400 | -0.78564600 | -0.14829600 | H | -5.72812500 | -0.81590200 | 2.32621900  |
| H                         | -5.08368400 | -0.39494500 | -0.69941700 | C | -6.96165100 | 1.48537900  | 3.29003400  |
| H                         | -4.49722000 | -0.84566700 | 0.90830400  | H | -6.52376700 | 1.93334500  | 1.21517200  |
| H                         | -3.39897000 | -0.07592700 | -0.25150100 | H | -7.62386900 | 0.58252800  | 1.43464900  |
| C                         | -2.62210800 | -2.71518700 | 0.14330300  | C | -8.13296800 | 2.46205300  | 3.43480600  |
| H                         | -2.30997100 | -3.70168100 | -0.20802300 | H | -7.14666100 | 0.59606600  | 3.90802600  |
| H                         | -1.77016700 | -2.03378000 | 0.07702200  | H | -6.04782300 | 1.94722400  | 3.68844400  |
| H                         | -2.90090300 | -2.80437300 | 1.19701500  | H | -8.28162700 | 2.75479200  | 4.47913900  |
| Rh                        | -3.27462400 | -3.78618400 | -3.57968000 | H | -7.96103500 | 3.37538000  | 2.85425600  |
| C                         | -3.89232700 | -2.67863900 | -4.98319000 | H | -9.06792000 | 2.01543000  | 3.07816400  |
| C                         | -5.03934700 | -4.83376900 | -3.51742600 | C | -2.82956000 | -4.64176400 | -3.94977800 |
| O                         | -4.25771000 | -2.02693000 | -5.84999400 | C | -3.97638200 | -4.83483300 | -3.54481700 |
| O                         | -6.13806500 | -5.15111700 | -3.57558800 | C | -5.12819700 | -5.51745300 | -2.93297800 |
| Cl                        | -2.40771500 | -5.00200900 | -5.65407400 | H | -4.76576200 | -6.34256000 | -2.31029600 |
| C                         | -2.77816800 | -6.94484200 | -1.98364000 | H | -5.72179300 | -4.84816600 | -2.30419600 |
| C                         | -3.93760200 | -6.89041400 | -0.96894300 | H | -5.77221100 | -5.93013300 | -3.71508400 |
| C                         | -3.20778100 | -7.71261000 | -3.25153800 | C | -1.06047300 | -5.98555000 | -6.27280700 |
| C                         | -1.57582100 | -7.68008100 | -1.33320200 | O | -1.24171000 | -6.04963200 | -7.46313900 |
| H                         | -3.65607600 | -6.34293500 | -0.06448100 | O | -1.06861200 | -7.05380700 | -5.44674900 |
| H                         | -4.82744700 | -6.41985300 | -1.39315800 | C | 0.78883700  | -4.62914700 | -5.29994700 |
| H                         | -4.21217100 | -7.90918000 | -0.67716700 | O | 1.33068300  | -4.34300300 | -4.24970900 |
| H                         | -2.40439700 | -7.73478900 | -3.99065800 | O | 1.44068100  | -4.90238400 | -6.43106300 |
| H                         | -3.47085000 | -8.73980600 | -2.97675500 | C | -1.36243500 | -8.31055100 | -6.08752800 |
| H                         | -4.07587400 | -7.25507900 | -3.72949000 | H | -0.61366900 | -8.53250200 | -6.85142200 |
| H                         | -1.87153700 | -8.69985200 | -1.06557500 | H | -1.33656500 | -9.05690300 | -5.29382300 |
| H                         | -0.73222600 | -7.73681500 | -2.02668600 | H | -2.34918200 | -8.27211700 | -6.55392400 |
| H                         | -1.24514000 | -7.16987200 | -0.42356900 | C | 2.86442700  | -4.67268300 | -6.41102100 |
| <b>INT-1b<sup>6</sup></b> |             |             |             | H | 3.22487600  | -5.01330600 | -7.38064200 |
| C                         | -0.74136800 | -4.68848600 | -5.50099000 | H | 3.05325500  | -3.60508800 | -6.28203700 |
| C                         | -1.17415900 | -3.48533500 | -6.40165600 | H | 3.33199400  | -5.23607900 | -5.60096700 |
| H                         | -0.42663800 | -3.35043500 | -7.18250000 | S | -0.07110800 | -0.94057800 | -5.81488200 |
| H                         | -2.11103400 | -3.76665500 | -6.88553300 | O | 1.07242400  | -1.66399900 | -6.40591900 |
| C                         | -1.36658500 | -4.66355500 | -4.08152700 | O | -0.66218700 | 0.21414000  | -6.51278200 |
| H                         | -1.03248500 | -5.55921400 | -3.54845900 | C | 0.46977200  | -0.35092000 | -4.19706800 |
| H                         | -0.94539900 | -3.81331200 | -3.54222500 | C | 1.15726000  | -1.20225000 | -3.32657600 |
| C                         | -1.40216800 | -2.19961000 | -5.63390600 | C | 0.30079300  | 1.00537500  | -3.91293500 |
| C                         | -2.54848900 | -1.93458300 | -5.02569000 | C | 1.64865100  | -0.67944400 | -2.12952900 |
| C                         | -3.47950400 | -1.20427800 | -4.27991100 | H | 1.31955800  | -2.24520100 | -3.57752200 |
| H                         | -3.99596800 | -0.42683800 | -4.84611900 | C | 0.81107000  | 1.51591200  | -2.71757900 |
| C                         | -3.48007100 | -0.88566000 | -2.77191200 | H | -0.20743900 | 1.63963800  | -4.63081000 |
| C                         | -4.92718300 | -1.10495000 | -2.22003300 | C | 1.47642800  | 0.67375600  | -1.82505300 |
| H                         | -5.63621600 | -0.56664600 | -2.86396600 | H | 2.17956600  | -1.32988500 | -1.44097900 |
| H                         | -5.17316200 | -2.16860800 | -2.31427000 | H | 0.69009400  | 2.57027400  | -2.48804300 |
| C                         | -5.12322000 | -0.68689800 | -0.83122600 | H | 1.87039500  | 1.07333400  | -0.89507900 |
| C                         | -5.29399000 | -0.35384500 | 0.32055200  | C | -3.12957900 | 0.61430800  | -2.63575500 |
| C                         | -5.53839100 | 0.06792900  | 1.70135300  | H | -3.84007400 | 1.23928100  | -3.18856500 |

|                           |             |             |             |    |             |             |              |
|---------------------------|-------------|-------------|-------------|----|-------------|-------------|--------------|
| H                         | -3.17196700 | 0.90912500  | -1.58344300 | C  | 1.03001200  | -2.27523100 | -6.65427000  |
| H                         | -2.12684300 | 0.81964900  | -3.01356300 | O  | 1.64503600  | -2.41607300 | -5.61585300  |
| C                         | -2.48390700 | -1.73014600 | -1.96621500 | O  | 1.55415400  | -1.83776200 | -7.80036400  |
| H                         | -2.71096700 | -2.79621500 | -2.04513800 | C  | -0.07123200 | -5.09766000 | -9.49895200  |
| H                         | -1.45860800 | -1.56303200 | -2.30512700 | H  | -0.09451300 | -4.46602700 | -10.38931000 |
| H                         | -2.53909000 | -1.45214900 | -0.90996300 | H  | 0.77874700  | -5.77796200 | -9.52353300  |
| Rh                        | -4.33712200 | -3.08436700 | -5.14994100 | H  | -1.00098000 | -5.66146600 | -9.40939700  |
| Cl                        | -4.69020300 | -5.02392900 | -6.76310100 | C  | 2.93056700  | -1.41201000 | -7.75010600  |
| C                         | -4.69835700 | -2.14872000 | -6.74799600 | H  | 3.20926500  | -1.21273000 | -8.78425400  |
| O                         | -4.92805000 | -1.61249600 | -7.73280500 | H  | 3.00285400  | -0.50456300 | -7.14930800  |
| C                         | -6.33959400 | -3.18129200 | -4.60000700 | H  | 3.55537700  | -2.19987900 | -7.32448600  |
| O                         | -7.46465400 | -3.05949600 | -4.43928700 | S  | -0.10647800 | 1.00869600  | -5.46932600  |
| <b>INT-1a<sup>7</sup></b> |             |             |             | O  | 0.99101900  | 0.67042700  | -6.39438600  |
| C                         | -0.47168700 | -2.56505600 | -6.80644500 | O  | -0.85715300 | 2.26111300  | -5.65460400  |
| C                         | -1.28349300 | -1.23349400 | -6.80808700 | C  | 0.54739100  | 1.01848300  | -3.79068300  |
| H                         | -0.90711100 | -0.62429200 | -7.63372600 | C  | 1.45425200  | 0.03162800  | -3.39353200  |
| H                         | -2.31565700 | -1.48788800 | -7.05226200 | C  | 0.16849200  | 2.05726800  | -2.93927900  |
| C                         | -0.88319000 | -3.54084200 | -5.66041200 | C  | 1.97525100  | 0.08718100  | -2.10009400  |
| H                         | -0.18133300 | -4.37785200 | -5.65331800 | H  | 1.74563200  | -0.75940100 | -4.07701200  |
| H                         | -0.77439800 | -3.02489700 | -4.70275900 | C  | 0.70503200  | 2.10245100  | -1.65090900  |
| C                         | -1.29868400 | -0.39066400 | -5.54435500 | H  | -0.52082400 | 2.81461000  | -3.29563600  |
| C                         | -2.21652300 | -0.38972800 | -4.60906700 | C  | 1.60234900  | 1.11759500  | -1.23207700  |
| C                         | -3.13864800 | -0.23980100 | -3.69166800 | H  | 2.67993400  | -0.67181600 | -1.77399300  |
| H                         | -3.96219700 | 0.43185900  | -3.94975600 | H  | 0.42570000  | 2.90852300  | -0.97905700  |
| C                         | -3.20914500 | -0.84092200 | -2.29428000 | H  | 2.01707400  | 1.15565800  | -0.22890900  |
| C                         | -4.58961600 | -1.57205600 | -2.18608400 | C  | -3.15982700 | 0.32471400  | -1.28164400  |
| H                         | -5.38305300 | -0.86235700 | -2.45896400 | H  | -3.95287500 | 1.05510200  | -1.47745600  |
| H                         | -4.61931200 | -2.37173300 | -2.93728200 | H  | -3.29728000 | -0.05811700 | -0.26630000  |
| C                         | -4.87458500 | -2.13220700 | -0.86521900 | H  | -2.19863200 | 0.84325700  | -1.33619400  |
| C                         | -5.10413300 | -2.59162700 | 0.23127900  | C  | -2.05963300 | -1.82209200 | -2.02927200  |
| C                         | -5.41945700 | -3.17226800 | 1.53792300  | H  | -2.08172300 | -2.65587000 | -2.73787800  |
| C                         | -6.64411100 | -4.11137300 | 1.50632100  | H  | -1.08949000 | -1.32440100 | -2.11517700  |
| H                         | -5.59806600 | -2.36718700 | 2.26433900  | H  | -2.14744700 | -2.23809900 | -1.02217100  |
| H                         | -4.54767800 | -3.72734900 | 1.91118300  | Rh | -2.61927700 | -6.19834300 | -4.92865500  |
| C                         | -6.95982800 | -4.71894100 | 2.87790800  | Cl | -1.65347100 | -7.14130200 | -6.89481300  |
| H                         | -7.51280100 | -3.55170700 | 1.13767500  | C  | -2.40598200 | -7.92782500 | -4.18042800  |
| H                         | -6.46017500 | -4.91064800 | 0.77772700  | O  | -2.26229100 | -8.97950400 | -3.75237800  |
| C                         | -8.17515700 | -5.65122000 | 2.85294800  | C  | -3.38376600 | -5.48905800 | -3.36775900  |
| H                         | -6.08191900 | -5.27054500 | 3.24117800  | O  | -3.86205700 | -5.06637300 | -2.41018100  |
| H                         | -7.13207800 | -3.91096700 | 3.60213400  | C  | -4.75221000 | -4.30826500 | -6.82353000  |
| H                         | -8.37744700 | -6.07032100 | 3.84384600  | C  | -5.84125300 | -4.70676200 | -5.80438800  |
| H                         | -9.07584200 | -5.11927800 | 2.52623900  | C  | -5.01475300 | -2.86948200 | -7.33771600  |
| H                         | -8.01800900 | -6.48820300 | 2.16325000  | C  | -4.75365100 | -5.28983700 | -8.01769700  |
| C                         | -2.25459900 | -4.05533200 | -5.82854200 | H  | -5.68772700 | -5.72718300 | -5.44201600  |
| C                         | -3.40530700 | -4.29313800 | -6.19592200 | H  | -5.85209000 | -4.03057700 | -4.94353500  |
| C                         | -0.73274500 | -3.27411600 | -8.15311700 | H  | -6.82269100 | -4.65896500 | -6.28663700  |
| O                         | -1.61992000 | -2.98272700 | -8.92741300 | H  | -4.25839700 | -2.57804100 | -8.07133000  |
| O                         | 0.12092600  | -4.28926500 | -8.31999200 | H  | -5.99709700 | -2.83286800 | -7.82007700  |

|                           |             |             |             |                           |             |             |              |
|---------------------------|-------------|-------------|-------------|---------------------------|-------------|-------------|--------------|
| H                         | -5.00909900 | -2.14697700 | -6.51564400 | H                         | 0.07158100  | -4.93669600 | -10.06747500 |
| H                         | -5.73940100 | -5.27545300 | -8.49487700 | H                         | 0.66624600  | -6.25840700 | -9.00466200  |
| H                         | -4.00326700 | -4.99651200 | -8.75603200 | H                         | -1.08574400 | -5.89918800 | -9.09476400  |
| H                         | -4.53049200 | -6.30899800 | -7.69442800 | C                         | 3.08159200  | -1.62777300 | -7.72784200  |
| <b>INT-1b<sup>7</sup></b> |             |             |             | H                         | 3.37802500  | -1.51187500 | -8.76961900  |
| C                         | -0.35893400 | -2.62935100 | -6.75185100 | H                         | 3.15624000  | -0.67795600 | -7.19666800  |
| C                         | -1.13972900 | -1.28735800 | -6.89453300 | H                         | 3.68971300  | -2.38784100 | -7.23304900  |
| H                         | -0.70972500 | -0.74828900 | -7.74169500 | S                         | 0.02165500  | 1.01334100  | -5.65148300  |
| H                         | -2.16372000 | -1.54093000 | -7.17591100 | O                         | 1.14924200  | 0.59385400  | -6.50470400  |
| C                         | -0.80536300 | -3.47829300 | -5.52719200 | O                         | -0.69242200 | 2.26625400  | -5.94439700  |
| H                         | -0.16212400 | -4.35831200 | -5.47065200 | C                         | 0.60093500  | 1.10943000  | -3.94967100  |
| H                         | -0.63004800 | -2.89753700 | -4.61729100 | C                         | 1.52656900  | 0.17373500  | -3.47971000  |
| C                         | -1.19408000 | -0.36426600 | -5.68994300 | C                         | 0.13494200  | 2.15247900  | -3.14766600  |
| C                         | -2.14201200 | -0.31332500 | -4.78702700 | C                         | 1.97868300  | 0.28621200  | -2.16416500  |
| C                         | -3.10036800 | -0.14736200 | -3.91109500 | H                         | 1.88321800  | -0.62247700 | -4.12504000  |
| H                         | -3.92685200 | 0.49825400  | -4.22048000 | C                         | 0.60047300  | 2.25328100  | -1.83536700  |
| C                         | -3.22853600 | -0.73621500 | -2.51173200 | H                         | -0.56350700 | 2.87227600  | -3.55972800  |
| C                         | -4.48861800 | -1.66749300 | -2.53826700 | C                         | 1.51693600  | 1.32024400  | -1.34467000  |
| H                         | -5.35096500 | -1.08303100 | -2.88793100 | H                         | 2.69792200  | -0.43194000 | -1.78211300  |
| H                         | -4.31839400 | -2.44664500 | -3.29266000 | H                         | 0.25290800  | 3.06339000  | -1.20124200  |
| C                         | -4.80996500 | -2.28898200 | -1.25335500 | H                         | 1.87722000  | 1.40216200  | -0.32327400  |
| C                         | -5.06353500 | -2.80320000 | -0.18669600 | C                         | -3.45699800 | 0.42883000  | -1.52582700  |
| C                         | -5.40353900 | -3.44359200 | 1.08549500  | H                         | -4.32086500 | 1.03631400  | -1.81841300  |
| C                         | -6.65175100 | -4.34749900 | 0.99937800  | H                         | -3.64379800 | 0.03785100  | -0.52156800  |
| H                         | -5.56673400 | -2.67209300 | 1.85086700  | H                         | -2.57909400 | 1.08062800  | -1.49029100  |
| H                         | -4.54846000 | -4.03895900 | 1.43412200  | C                         | -1.98498900 | -1.53597000 | -2.10230000  |
| C                         | -6.99434700 | -5.01138100 | 2.33809000  | H                         | -1.82005600 | -2.38206700 | -2.77554700  |
| H                         | -7.50276000 | -3.74869500 | 0.65166700  | H                         | -1.09069000 | -0.90697400 | -2.11443200  |
| H                         | -6.48251400 | -5.11632300 | 0.23506300  | H                         | -2.11439900 | -1.93771800 | -1.09409000  |
| C                         | -8.23132100 | -5.91155700 | 2.26008300  | Rh                        | -2.68244800 | -6.14304700 | -4.92627200  |
| H                         | -6.13306500 | -5.60041700 | 2.68178500  | Cl                        | -2.97217700 | -6.92581000 | -7.16275100  |
| H                         | -7.15371800 | -4.23419000 | 3.09807400  | C                         | -2.57358400 | -7.97089600 | -4.45840900  |
| H                         | -8.45253000 | -6.37020100 | 3.22915300  | O                         | -2.50753600 | -9.08480000 | -4.20332100  |
| H                         | -9.11608500 | -5.34364600 | 1.95097900  | C                         | -2.51204800 | -5.55776300 | -3.14573000  |
| H                         | -8.08805500 | -6.72007100 | 1.53435200  | O                         | -2.41546200 | -5.20906900 | -2.05395500  |
| C                         | -2.21687200 | -3.89159100 | -5.60490600 | <b>INT-1a<sup>8</sup></b> |             |             |              |
| C                         | -3.42447300 | -4.03647900 | -5.77583700 | C                         | -0.52956700 | -2.99857700 | -5.93687400  |
| C                         | -4.84757300 | -4.01596400 | -6.12471900 | C                         | -1.74010600 | -2.26991200 | -6.61168700  |
| H                         | -5.47902900 | -4.19710600 | -5.25003400 | H                         | -1.33430100 | -1.61479500 | -7.38576800  |
| H                         | -5.10424100 | -3.03619800 | -6.54254500 | H                         | -2.32012700 | -3.04251900 | -7.12422000  |
| H                         | -5.05492200 | -4.78733300 | -6.87142500 | C                         | -0.97402700 | -4.37613700 | -5.34216300  |
| C                         | -0.59718300 | -3.44373500 | -8.04247800 | H                         | -0.17036400 | -4.76160200 | -4.70646100  |
| O                         | -1.33342500 | -3.11197000 | -8.94298600 | H                         | -1.84418800 | -4.21773500 | -4.69848700  |
| O                         | 0.10735100  | -4.58463200 | -8.00826600 | C                         | -2.68723900 | -1.46638900 | -5.73983500  |
| C                         | 1.14770200  | -2.36182700 | -6.59637600 | C                         | -3.88589000 | -1.77428000 | -5.29142500  |
| O                         | 1.74400000  | -2.43146500 | -5.54016600 | C                         | -5.11248300 | -1.67930900 | -4.74491000  |
| O                         | 1.69993800  | -2.03910200 | -7.76717100 | H                         | -5.89475800 | -1.26501500 | -5.38560800  |
| C                         | -0.08055100 | -5.47523500 | -9.13013800 | C                         | -5.53953700 | -1.82729400 | -3.28306200  |

|   |              |             |             |                           |             |             |              |
|---|--------------|-------------|-------------|---------------------------|-------------|-------------|--------------|
| C | -6.77607300  | -2.78695100 | -3.22184300 | C                         | -5.99238200 | -0.41112100 | -2.84646800  |
| H | -7.52595600  | -2.44284700 | -3.94881800 | H                         | -6.77729300 | -0.01722700 | -3.50269700  |
| H | -6.45897000  | -3.78441800 | -3.54184100 | H                         | -6.40315400 | -0.47123300 | -1.83485000  |
| C | -7.39149300  | -2.87342700 | -1.89761700 | H                         | -5.15879600 | 0.29212300  | -2.84514500  |
| C | -7.89938900  | -2.95328400 | -0.80118400 | C                         | -4.40737100 | -2.32601400 | -2.37569100  |
| C | -8.54383200  | -3.09006300 | 0.50654900  | H                         | -4.08164000 | -3.32610200 | -2.66608700  |
| C | -9.77067900  | -4.02671000 | 0.48282400  | H                         | -3.54621800 | -1.65466500 | -2.41746900  |
| H | -8.85109800  | -2.10036200 | 0.87258200  | H                         | -4.76401700 | -2.36465600 | -1.34273300  |
| H | -7.81450000  | -3.46876900 | 1.23608200  | Rh                        | -4.99688000 | -3.67639600 | -6.23326200  |
| C | -10.43414700 | -4.16789600 | 1.85759800  | Cl                        | -4.45041100 | -5.21748700 | -4.49032100  |
| H | -10.49762800 | -3.64383700 | -0.24432400 | C                         | -5.51344200 | -5.25074000 | -7.15130900  |
| H | -9.45820200  | -5.01232800 | 0.11646100  | O                         | -5.82683300 | -6.21508000 | -7.68206000  |
| C | -11.65358700 | -5.09500900 | 1.84019700  | C                         | -5.44926900 | -2.56027200 | -7.68590100  |
| H | -9.69654500  | -4.54519000 | 2.57910800  | O                         | -5.73292000 | -1.89996200 | -8.58215600  |
| H | -10.73348800 | -3.17488000 | 2.22034500  | C                         | -1.64063700 | -7.15744200 | -8.34616800  |
| H | -12.10665000 | -5.17784400 | 2.83343300  | C                         | -2.49863100 | -8.32610300 | -7.80650300  |
| H | -12.42278100 | -4.72448200 | 1.15318500  | C                         | -2.34587900 | -6.50454900 | -9.55791400  |
| H | -11.37893000 | -6.10450000 | 1.51425400  | C                         | -0.25691500 | -7.69244500 | -8.78675100  |
| C | -1.27243600  | -5.35481900 | -6.38831900 | H                         | -2.01346900 | -8.80398100 | -6.95043600  |
| C | -1.45342600  | -6.15452100 | -7.28038500 | H                         | -3.48256700 | -7.97533400 | -7.48372500  |
| C | 0.53312300   | -3.24055600 | -7.02893200 | H                         | -2.64021100 | -9.08061400 | -8.58857100  |
| O | 0.49828200   | -2.79160500 | -8.15255500 | H                         | -1.76474100 | -5.66020900 | -9.94049000  |
| O | 1.51129700   | -4.04365000 | -6.57348400 | H                         | -2.46364300 | -7.23701300 | -10.36418100 |
| C | 0.06477500   | -2.16607500 | -4.79296600 | H                         | -3.33979200 | -6.13981700 | -9.28329800  |
| O | -0.48947600  | -2.03537100 | -3.71775500 | H                         | -0.37657500 | -8.45242000 | -9.56703800  |
| O | 1.24733700   | -1.62821300 | -5.10204000 | H                         | 0.36380000  | -6.88536100 | -9.18826500  |
| C | 2.55782000   | -4.33136600 | -7.51383500 | H                         | 0.27386700  | -8.14521200 | -7.94409200  |
| H | 3.04073200   | -3.40802300 | -7.84271100 | <b>INT-1b<sup>8</sup></b> |             |             |              |
| H | 3.26477800   | -4.96720100 | -6.98128800 | C                         | -0.39235600 | -2.85658000 | -6.06800000  |
| H | 2.15496900   | -4.85250400 | -8.38572700 | C                         | -1.68764300 | -2.17132500 | -6.61030600  |
| C | 1.82106200   | -0.74236900 | -4.12388400 | H                         | -1.37748800 | -1.45234500 | -7.37161000  |
| H | 2.82421200   | -0.51986500 | -4.48600400 | H                         | -2.25063400 | -2.95365200 | -7.12627600  |
| H | 1.22365200   | 0.16963200  | -4.07009100 | C                         | -0.71719400 | -4.21754600 | -5.37255000  |
| H | 1.86003300   | -1.22568800 | -3.14535400 | H                         | 0.17626100  | -4.56184300 | -4.84224800  |
| S | -2.22488000  | 0.32940300  | -5.69652200 | H                         | -1.49330200 | -4.05859300 | -4.61821500  |
| O | -0.75496600  | 0.37301000  | -5.78976500 | C                         | -2.63943500 | -1.46783000 | -5.65713900  |
| O | -3.03854200  | 0.97659000  | -6.73981700 | C                         | -3.80884800 | -1.86963300 | -5.19926800  |
| C | -2.69567300  | 1.06225500  | -4.12019200 | C                         | -5.06549600 | -1.79621900 | -4.70721000  |
| C | -2.07266300  | 0.65955200  | -2.93486200 | H                         | -5.80731400 | -1.41671200 | -5.41402700  |
| C | -3.57848100  | 2.14345300  | -4.15857500 | C                         | -5.59536700 | -1.87828200 | -3.27418900  |
| C | -2.36848300  | 1.35123700  | -1.75975200 | C                         | -6.72100100 | -2.96688400 | -3.20840500  |
| H | -1.37953900  | -0.17548300 | -2.93170100 | H                         | -7.43363000 | -2.79142500 | -4.02691600  |
| C | -3.85184500  | 2.83287300  | -2.97577900 | H                         | -6.26601300 | -3.94582600 | -3.38831400  |
| H | -4.02439300  | 2.43562700  | -5.10264100 | C                         | -7.44210400 | -2.99040400 | -1.93565900  |
| C | -3.25087900  | 2.43537600  | -1.77976000 | C                         | -8.03433600 | -3.01697300 | -0.87969200  |
| H | -1.90178500  | 1.04632200  | -0.82805200 | C                         | -8.77488800 | -3.08520200 | 0.38163200   |
| H | -4.53264700  | 3.67847500  | -2.99133300 | C                         | -9.98589200 | -4.04091000 | 0.32599200   |
| H | -3.46739900  | 2.97264700  | -0.86103700 | H                         | -9.12036400 | -2.07979400 | 0.66050100   |

|   |              |             |             |                           |             |             |             |
|---|--------------|-------------|-------------|---------------------------|-------------|-------------|-------------|
| H | -8.09877900  | -3.40584900 | 1.18631700  | C                         | -4.49875600 | -2.15854000 | -2.23877300 |
| C | -10.75043800 | -4.10286000 | 1.65326300  | H                         | -4.00743700 | -3.11306900 | -2.43245200 |
| H | -10.65935900 | -3.71726100 | -0.47738400 | H                         | -3.74625300 | -1.36642500 | -2.24416500 |
| H | -9.63576800  | -5.04318200 | 0.04994600  | H                         | -4.94777400 | -2.19665900 | -1.24233800 |
| C | -11.95513700 | -5.04808400 | 1.60589400  | Rh                        | -4.71004100 | -3.88602300 | -5.96256700 |
| H | -10.06582800 | -4.42041800 | 2.45164000  | Cl                        | -3.99933200 | -5.16251600 | -4.06546600 |
| H | -11.08709200 | -3.09303700 | 1.92554000  | C                         | -5.01812000 | -5.61350200 | -6.71150400 |
| H | -12.48290800 | -5.07092600 | 2.56482800  | O                         | -5.19091700 | -6.66081100 | -7.13732500 |
| H | -12.67248000 | -4.73672400 | 0.83819500  | C                         | -5.29838000 | -2.98903900 | -7.51157700 |
| H | -11.64567700 | -6.07290700 | 1.37180800  | O                         | -5.66623300 | -2.45784700 | -8.46193500 |
| C | -1.13211400  | -5.24080400 | -6.33338200 | <b>INT-1a<sup>9</sup></b> |             |             |             |
| C | -1.41572200  | -6.07938900 | -7.15953600 | C                         | 1.10018100  | -2.89454500 | -5.49646800 |
| C | -1.74365400  | -7.11381600 | -8.13741500 | C                         | 0.47948600  | -1.80971600 | -6.42893600 |
| H | -1.00683300  | -7.92466000 | -8.11493200 | H                         | 1.20706200  | -1.58309600 | -7.21093900 |
| H | -2.72685400  | -7.55460900 | -7.93991900 | H                         | -0.38277100 | -2.26895200 | -6.91623500 |
| H | -1.75750500  | -6.70678800 | -9.15492300 | C                         | 0.13487100  | -3.31872500 | -4.35260300 |
| C | 0.52240200   | -3.12184300 | -7.28117600 | H                         | 0.65733400  | -4.03660100 | -3.71280900 |
| O | 0.30832500   | -2.75825600 | -8.41541500 | H                         | -0.05157100 | -2.43558400 | -3.73672900 |
| O | 1.59806700   | -3.84303800 | -6.91469000 | C                         | 0.02282100  | -0.51676200 | -5.77593900 |
| C | 0.33274500   | -1.96200900 | -5.05676100 | C                         | -1.16201100 | -0.26842300 | -5.27713000 |
| O | 0.00934700   | -1.88835200 | -3.88675800 | C                         | -2.35800600 | 0.04845900  | -4.85077000 |
| O | 1.34785900   | -1.28906700 | -5.60450600 | H                         | -3.06480500 | 0.39886000  | -5.60746000 |
| C | 2.51333300   | -4.16280500 | -7.97470400 | C                         | -2.91514800 | -0.02309900 | -3.43150000 |
| H | 2.89842200   | -3.25018800 | -8.43591000 | C                         | -3.97913500 | -1.17296300 | -3.45939700 |
| H | 3.31944600   | -4.72725200 | -7.50647100 | H                         | -4.73788200 | -0.93409900 | -4.21418800 |
| H | 2.01571800   | -4.76552000 | -8.73832500 | H                         | -3.47803200 | -2.09460000 | -3.78335400 |
| C | 2.00723700   | -0.32742200 | -4.75995100 | C                         | -4.65471500 | -1.44785600 | -2.17047900 |
| H | 2.87774800   | 0.00589900  | -5.32386300 | C                         | -4.93132900 | -2.10360400 | -1.12566200 |
| H | 1.33097700   | 0.50833900  | -4.57181500 | C                         | -4.89236200 | -3.23673800 | -0.17400100 |
| H | 2.30831500   | -0.78928900 | -3.81736100 | C                         | -6.01029200 | -4.27147900 | -0.41942000 |
| S | -2.33549400  | 0.36269200  | -5.56102100 | H                         | -4.96031400 | -2.86281400 | 0.85406000  |
| O | -0.90879900  | 0.54678500  | -5.88328600 | H                         | -3.91132600 | -3.72207500 | -0.27233300 |
| O | -3.36245300  | 0.99631300  | -6.40638800 | C                         | -5.94136500 | -5.45047900 | 0.55907500  |
| C | -2.59734100  | 0.95434900  | -3.87784800 | H                         | -6.98340600 | -3.77325000 | -0.33023200 |
| C | -1.80291800  | 0.49168800  | -2.82489200 | H                         | -5.93907100 | -4.63897800 | -1.45088300 |
| C | -3.51510200  | 1.99309100  | -3.70673400 | C                         | -7.05249300 | -6.47901800 | 0.32687600  |
| C | -1.95952300  | 1.07537900  | -1.56700100 | H                         | -4.96217800 | -5.94023600 | 0.47036800  |
| H | -1.08474900  | -0.30606900 | -2.98197800 | H                         | -6.00154900 | -5.07046600 | 1.58767700  |
| C | -3.64841000  | 2.57448500  | -2.44437300 | H                         | -6.98071700 | -7.30728400 | 1.03864700  |
| H | -4.09815400  | 2.33584400  | -4.55417300 | H                         | -8.04278700 | -6.02496000 | 0.44260900  |
| C | -2.87588200  | 2.11331800  | -1.37683900 | H                         | -6.99761700 | -6.90153200 | -0.68264300 |
| H | -1.35774800  | 0.72075200  | -0.73576800 | C                         | -1.11427500 | -3.90479900 | -4.84026100 |
| H | -4.35492700  | 3.38588500  | -2.29823600 | C                         | -2.11746000 | -4.42124600 | -5.28278900 |
| H | -2.98460500  | 2.56564100  | -0.39540800 | C                         | 1.42073600  | -4.12155000 | -6.36813600 |
| C | -6.23644500  | -0.49139400 | -3.01063800 | O                         | 1.19444900  | -4.22141200 | -7.55209300 |
| H | -7.02222300  | -0.26436700 | -3.74037900 | O                         | 1.97004400  | -5.10188500 | -5.62260400 |
| H | -6.69452900  | -0.50005000 | -2.01802000 | C                         | 2.39441700  | -2.36579400 | -4.85865900 |
| H | -5.49117100  | 0.30547000  | -3.04484900 | O                         | 2.45442000  | -1.88814500 | -3.74348600 |

|    |             |             |             |                           |             |             |             |
|----|-------------|-------------|-------------|---------------------------|-------------|-------------|-------------|
| O  | 3.43039800  | -2.48468000 | -5.69441400 | <b>INT-1b<sup>9</sup></b> |             |             |             |
| C  | 2.30940900  | -6.30205700 | -6.33837900 | C                         | 1.20265800  | -2.89605500 | -5.52644700 |
| H  | 3.03204300  | -6.08330900 | -7.12804300 | C                         | 0.53969300  | -1.83300900 | -6.45509800 |
| H  | 2.74117100  | -6.97410600 | -5.59716900 | H                         | 1.25222700  | -1.58691000 | -7.24507100 |
| H  | 1.41632800  | -6.74459000 | -6.78602200 | H                         | -0.31274900 | -2.31987300 | -6.93253800 |
| C  | 4.66880100  | -1.88574100 | -5.26311800 | C                         | 0.27679100  | -3.32579800 | -4.35335000 |
| H  | 5.40649200  | -2.17664400 | -6.01018100 | H                         | 0.81809700  | -4.05220800 | -3.73940100 |
| H  | 4.55226400  | -0.80142300 | -5.23792400 | H                         | 0.11872000  | -2.44743500 | -3.72254800 |
| H  | 4.94832200  | -2.25913900 | -4.27565300 | C                         | 0.04807800  | -0.55219700 | -5.80369600 |
| S  | 1.16065900  | 0.91337100  | -5.94441800 | C                         | -1.14664000 | -0.33234300 | -5.31500700 |
| O  | 2.52074500  | 0.35175800  | -6.04559800 | C                         | -2.35181600 | -0.03894800 | -4.89820100 |
| O  | 0.64857100  | 1.78428300  | -7.01448900 | H                         | -3.05953500 | 0.29867800  | -5.65985900 |
| C  | 1.03502100  | 1.82295600  | -4.39657200 | C                         | -2.91401900 | -0.11210600 | -3.48148800 |
| C  | 1.69294400  | 1.34416800  | -3.26006400 | C                         | -4.01056500 | -1.23050400 | -3.52170400 |
| C  | 0.30842200  | 3.01436000  | -4.38178900 | H                         | -4.75431400 | -0.96999700 | -4.28397000 |
| C  | 1.60262100  | 2.08068100  | -2.07813700 | H                         | -3.53099100 | -2.16588000 | -3.83870900 |
| H  | 2.25332200  | 0.41581300  | -3.29922800 | C                         | -4.70528300 | -1.48317200 | -2.23845600 |
| C  | 0.22917000  | 3.74017100  | -3.19170400 | C                         | -5.00376100 | -2.12037000 | -1.18854000 |
| H  | -0.16645200 | 3.36229700  | -5.29238600 | C                         | -4.99428300 | -3.24230900 | -0.22312200 |
| C  | 0.87244800  | 3.27241900  | -2.04330200 | C                         | -6.14536800 | -4.24487200 | -0.44816900 |
| H  | 2.10739400  | 1.72500300  | -1.18497600 | H                         | -5.04413700 | -2.85386300 | 0.80060700  |
| H  | -0.32750900 | 4.67207600  | -3.16458500 | H                         | -4.02925600 | -3.75887500 | -0.32106800 |
| H  | 0.80923500  | 3.84055100  | -1.11974600 | C                         | -6.10033200 | -5.41835700 | 0.53829500  |
| C  | -3.57631200 | 1.33452400  | -3.11891700 | H                         | -7.10183100 | -3.71676900 | -0.35161700 |
| H  | -4.35106900 | 1.58447300  | -3.85133600 | H                         | -6.09758900 | -4.62164600 | -1.47764200 |
| H  | -4.04591800 | 1.32693600  | -2.12894200 | C                         | -7.24421500 | -6.41493100 | 0.32654500  |
| H  | -2.82768600 | 2.13235000  | -3.12667000 | H                         | -5.13727400 | -5.93779000 | 0.44216100  |
| C  | -1.82678400 | -0.32929300 | -2.39339200 | H                         | -6.13718800 | -5.02936300 | 1.56461200  |
| H  | -1.37673700 | -1.31153500 | -2.56173400 | H                         | -7.18900900 | -7.23971500 | 1.04379500  |
| H  | -1.03254400 | 0.42028400  | -2.42734800 | H                         | -8.21917800 | -5.93071600 | 0.44981800  |
| H  | -2.25312100 | -0.32822300 | -1.38580300 | H                         | -7.21355100 | -6.84638300 | -0.68024100 |
| Rh | -6.16874800 | -0.40018300 | -1.13770700 | C                         | -0.99568000 | -3.89812200 | -4.79449400 |
| Cl | -7.22911000 | 1.45727100  | -0.19756600 | C                         | -2.02846100 | -4.39511300 | -5.18482800 |
| C  | -7.63985400 | -1.07102700 | -1.92546300 | C                         | -3.26398800 | -5.01099000 | -5.66351800 |
| O  | -8.56247400 | -1.53072400 | -2.44386200 | H                         | -3.60139500 | -5.80367700 | -4.98628000 |
| C  | -3.31110100 | -5.08540500 | -5.84130100 | H                         | -4.07372700 | -4.27742600 | -5.74767700 |
| C  | -4.26877700 | -5.48303800 | -4.69346600 | H                         | -3.12022900 | -5.45909000 | -6.65286300 |
| C  | -4.03331900 | -4.12353100 | -6.81362300 | C                         | 1.52881200  | -4.12391300 | -6.39549800 |
| C  | -2.86477700 | -6.35374200 | -6.60758700 | O                         | 1.28384100  | -4.23602000 | -7.57441400 |
| H  | -3.77621400 | -6.16067000 | -3.98970600 | O                         | 2.11184000  | -5.08789900 | -5.65384600 |
| H  | -4.60674900 | -4.60170200 | -4.13891300 | C                         | 2.50403200  | -2.33974900 | -4.92624300 |
| H  | -5.15119900 | -5.98966100 | -5.09906400 | O                         | 2.58951800  | -1.86779900 | -3.81035400 |
| H  | -3.37604800 | -3.83556800 | -7.63922700 | O                         | 3.51505300  | -2.42963300 | -5.79539600 |
| H  | -4.92040400 | -4.60982900 | -7.23382000 | C                         | 2.46665200  | -6.28420600 | -6.36891900 |
| H  | -4.35380000 | -3.21187400 | -6.30034600 | H                         | 3.17565700  | -6.05403100 | -7.16766200 |
| H  | -3.73559700 | -6.85651000 | -7.04270200 | H                         | 2.92046700  | -6.94432800 | -5.63018300 |
| H  | -2.17407400 | -6.09647800 | -7.41590600 | H                         | 1.57774800  | -6.74648100 | -6.80463100 |
| H  | -2.36014400 | -7.05726100 | -5.93855900 | C                         | 4.75148000  | -1.80225600 | -5.40019700 |

|                            |             |             |             |   |             |              |              |
|----------------------------|-------------|-------------|-------------|---|-------------|--------------|--------------|
| H                          | 5.46764000  | -2.05793400 | -6.18033900 | C | -6.69777300 | -7.49971700  | -8.50235900  |
| H                          | 4.60503600  | -0.72250200 | -5.34951500 | H | -7.77039800 | -5.74939900  | -7.80022500  |
| H                          | 5.07987600  | -2.18521400 | -4.43155000 | H | -7.47998500 | -6.94960700  | -6.55438500  |
| S                          | 1.14751100  | 0.90916400  | -5.96373200 | C | -7.93952600 | -8.27663300  | -8.95432900  |
| O                          | 2.51979300  | 0.38344200  | -6.08900600 | H | -6.23963300 | -6.99542200  | -9.36219100  |
| O                          | 0.60095300  | 1.78315000  | -7.01402300 | H | -5.94301600 | -8.19551800  | -8.11538600  |
| C                          | 1.01713600  | 1.79318600  | -4.40111700 | C | -7.63251200 | -9.32167700  | -10.03155600 |
| C                          | 1.69354800  | 1.31138700  | -3.27672700 | H | -8.39528000 | -8.76933600  | -8.08445000  |
| C                          | 0.26736800  | 2.96964200  | -4.36332500 | H | -8.69178300 | -7.57067100  | -9.33210200  |
| C                          | 1.59751600  | 2.02870800  | -2.08341900 | H | -8.53585400 | -9.86212500  | -10.33215100 |
| H                          | 2.27374500  | 0.39613700  | -3.33362000 | H | -7.21054600 | -8.85430200  | -10.92837200 |
| C                          | 0.18371500  | 3.67695100  | -3.16238900 | H | -6.90688100 | -10.05994400 | -9.67198000  |
| H                          | -0.22175700 | 3.32077400  | -5.26510200 | C | -1.99382600 | -4.40934000  | -1.92093700  |
| C                          | 0.84458600  | 3.20524100  | -2.02566100 | C | -1.94785600 | -5.49096900  | -2.50681500  |
| H                          | 2.11644200  | 1.67030100  | -1.19949600 | C | -0.17733400 | -2.99250000  | 0.21628600   |
| H                          | -0.39052600 | 4.59745600  | -3.11772400 | O | 0.98132600  | -2.87797900  | -0.10345700  |
| H                          | 0.77753900  | 3.75868200  | -1.09350100 | O | -0.60290400 | -3.72945800  | 1.26361500   |
| C                          | -3.53616500 | 1.26087900  | -3.15501200 | C | -2.07547000 | -1.40050800  | 0.50940700   |
| H                          | -4.30359600 | 1.54054900  | -3.88434900 | O | -3.27503700 | -1.36780800  | 0.69801200   |
| H                          | -4.00523500 | 1.25670600  | -2.16464400 | O | -1.19302700 | -0.61003300  | 1.12771000   |
| H                          | -2.76510400 | 2.03692300  | -3.15494800 | C | 0.43624100  | -4.38904100  | 2.01243600   |
| C                          | -1.83617800 | -0.46417800 | -2.44709500 | H | 1.13230300  | -3.65443100  | 2.42360100   |
| H                          | -1.42020900 | -1.45873000 | -2.63038000 | H | -0.07454500 | -4.92560100  | 2.81148800   |
| H                          | -1.01811800 | 0.26005700  | -2.47195700 | H | 0.98629900  | -5.08076900  | 1.37057600   |
| H                          | -2.26181300 | -0.46175300 | -1.43920600 | C | -1.75080000 | 0.43842900   | 1.94639000   |
| Rh                         | -6.20925700 | -0.39359900 | -1.23342100 | H | -0.89580100 | 0.93033800   | 2.40825500   |
| Cl                         | -7.24468700 | 1.49472900  | -0.32837400 | H | -2.30107000 | 1.13569900   | 1.31164900   |
| C                          | -7.68506600 | -1.04910100 | -2.02493100 | H | -2.41505600 | 0.01875600   | 2.70460600   |
| O                          | -8.61128700 | -1.49920300 | -2.54538100 | S | -2.54965100 | 0.48749600   | -2.77852900  |
| <b>INT-1a<sup>10</sup></b> |             |             |             | O | -2.20929300 | 1.05590600   | -1.45870000  |
| C                          | -1.37249700 | -2.33033300 | -0.49708100 | O | -2.10808700 | 1.15832200   | -4.01273300  |
| C                          | -0.82268100 | -1.47682100 | -1.67951700 | C | -4.34792900 | 0.36876700   | -2.86003800  |
| H                          | -0.42175500 | -0.54442000 | -1.28091900 | C | -5.07021300 | -0.15915000  | -1.78525700  |
| H                          | 0.01212500  | -2.02822200 | -2.11720400 | C | -4.98774900 | 0.92861500   | -3.96729500  |
| C                          | -2.41140700 | -3.39402100 | -0.93575200 | C | -6.46425600 | -0.15436400  | -1.84943900  |
| H                          | -2.73754200 | -3.93829700 | -0.04444400 | H | -4.56349400 | -0.55028900  | -0.90902700  |
| H                          | -3.29145700 | -2.86970900 | -1.31404800 | C | -6.38362700 | 0.93892600   | -4.00934000  |
| C                          | -1.83276600 | -1.19881100 | -2.77358100 | H | -4.39248800 | 1.35819700   | -4.76543500  |
| C                          | -2.05275400 | -2.04295400 | -3.76904000 | C | -7.11937800 | 0.39175300   | -2.95675500  |
| C                          | -2.55023500 | -2.52674500 | -4.95907900 | H | -7.03807400 | -0.56528200  | -1.02428200  |
| H                          | -2.06752100 | -2.12393600 | -5.85082200 | H | -6.89256800 | 1.37662100   | -4.86281100  |
| C                          | -3.91329600 | -3.14672400 | -5.28820400 | H | -8.20484000 | 0.39907500   | -2.99380200  |
| C                          | -3.64116000 | -4.38741300 | -6.20021000 | C | -4.69856900 | -2.09770700  | -6.11056000  |
| H                          | -3.08175200 | -4.05230300 | -7.08464200 | H | -4.13078300 | -1.77160900  | -6.98907700  |
| H                          | -2.97135700 | -5.06916000 | -5.66558100 | H | -5.63503300 | -2.54150300  | -6.46185300  |
| C                          | -4.84280700 | -5.10405600 | -6.62652300 | H | -4.93589200 | -1.21821900  | -5.50913800  |
| C                          | -5.83793000 | -5.70243000 | -6.97112200 | C | -4.72186300 | -3.53906500  | -4.04555900  |
| C                          | -7.01583800 | -6.44996300 | -7.41618400 | H | -4.20089200 | -4.29058400  | -3.44856800  |

|                            |             |              |             |    |             |              |              |
|----------------------------|-------------|--------------|-------------|----|-------------|--------------|--------------|
| H                          | -4.91598200 | -2.66603100  | -3.41579900 | H  | -6.92403000 | -9.44638500  | -10.41397100 |
| H                          | -5.68473000 | -3.95710500  | -4.35096100 | H  | -7.01561100 | -10.38563100 | -8.91937000  |
| Rh                         | -0.89680700 | -3.79703300  | -4.01322700 | C  | -2.06858500 | -4.37410700  | -1.86905800  |
| C                          | 0.23390900  | -3.01093700  | -5.27896500 | C  | -2.07676700 | -5.41118900  | -2.52539200  |
| O                          | 0.94745200  | -2.53556400  | -6.04103600 | C  | -2.17907100 | -6.77811000  | -3.04503400  |
| Cl                         | 0.96815200  | -5.30694000  | -3.79784600 | H  | -2.87785800 | -6.83658500  | -3.88510100  |
| C                          | -2.04903700 | -6.96357800  | -2.74425600 | H  | -1.19895100 | -7.12910100  | -3.37483300  |
| C                          | -3.44066600 | -7.38005300  | -2.19747300 | H  | -2.54606800 | -7.43333700  | -2.24683600  |
| C                          | -1.94504300 | -7.37557500  | -4.22510600 | C  | -0.16245000 | -3.00956500  | 0.24650600   |
| C                          | -0.94235600 | -7.66824300  | -1.92266600 | O  | 0.99005500  | -2.92507900  | -0.10370100  |
| H                          | -3.54597000 | -7.12556400  | -1.13864900 | O  | -0.57944500 | -3.73194800  | 1.30656800   |
| H                          | -4.24895600 | -6.89585200  | -2.75323700 | C  | -2.02509600 | -1.38206000  | 0.58079600   |
| H                          | -3.55649600 | -8.46411600  | -2.30129000 | O  | -3.21880700 | -1.33348900  | 0.79963800   |
| H                          | -0.99863700 | -7.04975600  | -4.65914500 | O  | -1.11666100 | -0.60224800  | 1.17441200   |
| H                          | -2.00156100 | -8.46698500  | -4.29282800 | C  | 0.46041500  | -4.42060300  | 2.02841800   |
| H                          | -2.77183200 | -6.96669400  | -4.81239500 | H  | 1.18600100  | -3.70542700  | 2.42239500   |
| H                          | -1.04910000 | -8.75312700  | -2.03057600 | H  | -0.04454300 | -4.94436200  | 2.83949100   |
| H                          | 0.04592300  | -7.36962400  | -2.27458300 | H  | 0.97471000  | -5.12590500  | 1.37191800   |
| H                          | -1.02615200 | -7.41847800  | -0.86048300 | C  | -1.63954200 | 0.45425100   | 2.00598200   |
| <b>INT-1b<sup>10</sup></b> |             |              |             | H  | -0.76662300 | 0.93484000   | 2.44565500   |
| C                          | -1.35960700 | -2.32276100  | -0.44144000 | H  | -2.19630600 | 1.15853500   | 1.38473700   |
| C                          | -0.81699300 | -1.47616700  | -1.63318500 | H  | -2.29009600 | 0.04388600   | 2.78093100   |
| H                          | -0.40801600 | -0.54465700  | -1.24048000 | S  | -2.55393200 | 0.48847700   | -2.72377200  |
| H                          | 0.01225300  | -2.03307200  | -2.07386200 | O  | -2.19891800 | 1.06183200   | -1.40997200  |
| C                          | -2.42805900 | -3.36735500  | -0.85535500 | O  | -2.13758200 | 1.15850300   | -3.96703000  |
| H                          | -2.73168900 | -3.91672200  | 0.04095500  | C  | -4.35146100 | 0.35120100   | -2.77880400  |
| H                          | -3.31306000 | -2.82560800  | -1.19703000 | C  | -5.05447200 | -0.13427100  | -1.67173100  |
| C                          | -1.82803000 | -1.19382300  | -2.72546400 | C  | -5.01060900 | 0.84376100   | -3.90642400  |
| C                          | -2.04257800 | -2.03235300  | -3.72659400 | C  | -6.44894100 | -0.15570900  | -1.72209500  |
| C                          | -2.52931900 | -2.51800500  | -4.92195300 | H  | -4.53213200 | -0.47389700  | -0.78331000  |
| H                          | -2.04073800 | -2.11151800  | -5.80871500 | C  | -6.40663400 | 0.82712900   | -3.93583500  |
| C                          | -3.89239600 | -3.13831400  | -5.26105100 | H  | -4.42954100 | 1.24594400   | -4.72898000  |
| C                          | -3.62353100 | -4.44003700  | -6.08692100 | C  | -7.12320300 | 0.32166200   | -2.84956100  |
| H                          | -2.98861200 | -4.18444900  | -6.94631100 | H  | -7.00825700 | -0.53339700  | -0.87150400  |
| H                          | -3.02784000 | -5.12620200  | -5.47337200 | H  | -6.93089700 | 1.21263300   | -4.80504000  |
| C                          | -4.83118900 | -5.11762200  | -6.55920200 | H  | -8.20889800 | 0.30841600   | -2.87646400  |
| C                          | -5.83097100 | -5.67847700  | -6.94996600 | C  | -4.62625900 | -2.12200000  | -6.16755500  |
| C                          | -7.01022800 | -6.38769200  | -7.45089900 | H  | -4.03058800 | -1.87215600  | -7.05258000  |
| C                          | -6.65932600 | -7.66899100  | -8.23719600 | H  | -5.57075400 | -2.55497200  | -6.50966400  |
| H                          | -7.59423400 | -5.71614100  | -8.09550500 | H  | -4.84358800 | -1.19837100  | -5.62735300  |
| H                          | -7.66883900 | -6.64657700  | -6.61019400 | C  | -4.75098000 | -3.44111800  | -4.02624500  |
| C                          | -7.89967100 | -8.39640400  | -8.76853100 | H  | -4.26489000 | -4.16172800  | -3.36492700  |
| H                          | -5.99671800 | -7.40428300  | -9.07051600 | H  | -4.95318700 | -2.52924500  | -3.45768300  |
| H                          | -6.08359500 | -8.33952500  | -7.58708000 | H  | -5.70855300 | -3.86436000  | -4.34118700  |
| C                          | -7.55723800 | -9.66988900  | -9.54798800 | Rh | -0.91905700 | -3.80112700  | -3.97278500  |
| H                          | -8.56168700 | -8.64765600  | -7.92838600 | C  | 0.26397400  | -3.05452700  | -5.21343500  |
| H                          | -8.47178000 | -7.71474800  | -9.41276900 | O  | 1.00968400  | -2.60514200  | -5.96004900  |
| H                          | -8.46033700 | -10.16736000 | -9.91592300 | Cl | 0.82183800  | -5.45284000  | -3.78745100  |



|                            |             |             |             |                            |             |             |             |
|----------------------------|-------------|-------------|-------------|----------------------------|-------------|-------------|-------------|
| <b>INT-1a<sup>II</sup></b> |             |             |             | O                          | 2.45858200  | 0.61247000  | -6.06354400 |
| C                          | 1.39367900  | -2.73747000 | -5.70408100 | O                          | 0.43261000  | 2.06142300  | -6.60964100 |
| C                          | 0.59317400  | -1.67952300 | -6.52571300 | C                          | 1.02312300  | 1.64629900  | -4.06651600 |
| H                          | 1.23232200  | -1.34434500 | -7.34633400 | C                          | 1.79537800  | 1.02035700  | -3.08401200 |
| H                          | -0.25470400 | -2.19563100 | -6.97648700 | C                          | 0.21651300  | 2.74896700  | -3.77929600 |
| C                          | 0.67431000  | -3.19466100 | -4.40271300 | C                          | 1.73777600  | 1.51038300  | -1.77845700 |
| H                          | 1.38819800  | -3.75568400 | -3.79554100 | H                          | 2.42550500  | 0.17250600  | -3.33240700 |
| H                          | 0.42043100  | -2.30711300 | -3.81735900 | C                          | 0.17378700  | 3.22913900  | -2.46920000 |
| C                          | 0.04741700  | -0.46891700 | -5.78805100 | H                          | -0.34751100 | 3.22090500  | -4.57598700 |
| C                          | -1.17876600 | -0.32783600 | -5.34724800 | C                          | 0.92926300  | 2.60841400  | -1.47152600 |
| C                          | -2.40797700 | -0.10107400 | -4.95963500 | H                          | 2.33057700  | 1.03623000  | -1.00216300 |
| H                          | -3.08847400 | 0.29688200  | -5.71717700 | H                          | -0.44356700 | 4.09010700  | -2.23095100 |
| C                          | -3.02911900 | -0.34621800 | -3.59011300 | H                          | 0.89266500  | 2.98445100  | -0.45322900 |
| C                          | -4.14867100 | -1.41947900 | -3.81455000 | C                          | -3.66023900 | 0.97241800  | -3.09702500 |
| H                          | -4.87812300 | -1.02076400 | -4.53326600 | H                          | -4.36164400 | 1.37976300  | -3.83376300 |
| H                          | -3.68759100 | -2.29108900 | -4.29806000 | H                          | -4.21000300 | 0.79687200  | -2.16751700 |
| C                          | -4.83287600 | -1.85072100 | -2.59655200 | H                          | -2.88778400 | 1.72426800  | -2.90959000 |
| C                          | -5.37200200 | -2.23554200 | -1.58269800 | C                          | -2.00077800 | -0.85115400 | -2.56986900 |
| C                          | -6.01399300 | -2.75673000 | -0.37467300 | H                          | -1.56903300 | -1.80647300 | -2.88442800 |
| C                          | -6.12032400 | -4.29733800 | -0.36553000 | H                          | -1.18673700 | -0.13199600 | -2.44119700 |
| H                          | -7.01592900 | -2.31734900 | -0.27043300 | H                          | -2.48127900 | -1.01021900 | -1.60165500 |
| H                          | -5.44575000 | -2.42805700 | 0.50645600  | Rh                         | -1.41032700 | -5.29774400 | -3.16125200 |
| C                          | -6.76778600 | -4.83490300 | 0.91568900  | Cl                         | -2.25894300 | -5.92953600 | -1.07580100 |
| H                          | -6.70318700 | -4.61738200 | -1.23871500 | C                          | -0.32756300 | -6.72147600 | -3.33118400 |
| H                          | -5.11788300 | -4.72495000 | -0.48631700 | O                          | 0.37778900  | -7.62297100 | -3.47813500 |
| C                          | -6.88777600 | -6.36210500 | 0.92486000  | C                          | -2.37070300 | -5.12878200 | -6.28291500 |
| H                          | -6.17734400 | -4.50936100 | 1.78310000  | C                          | -3.78154900 | -5.42749400 | -5.73182500 |
| H                          | -7.76366500 | -4.38632400 | 1.03913100  | C                          | -2.45025100 | -4.03594500 | -7.37437700 |
| H                          | -7.34736100 | -6.72087100 | 1.85173600  | C                          | -1.76448500 | -6.41607600 | -6.89128100 |
| H                          | -7.50343400 | -6.71534400 | 0.08967700  | H                          | -3.74916100 | -6.20103400 | -4.95899400 |
| H                          | -5.90404800 | -6.83489100 | 0.83302000  | H                          | -4.23895800 | -4.53213700 | -5.29896200 |
| C                          | -0.53037300 | -4.03152000 | -4.61214800 | H                          | -4.42758300 | -5.77912300 | -6.54279900 |
| C                          | -1.47156400 | -4.64840200 | -5.18597900 | H                          | -1.46992800 | -3.86520000 | -7.82606600 |
| C                          | 1.61656200  | -3.97036300 | -6.60060700 | H                          | -3.13804900 | -4.36048300 | -8.16247800 |
| O                          | 1.10968200  | -4.15683800 | -7.68556500 | H                          | -2.82411900 | -3.09226400 | -6.96512700 |
| O                          | 2.43058400  | -4.84985500 | -5.99014600 | H                          | -2.41265200 | -6.77859900 | -7.69602300 |
| C                          | 2.77258800  | -2.17991200 | -5.30245600 | H                          | -0.77530700 | -6.21668700 | -7.31239100 |
| O                          | 3.07880700  | -1.85923200 | -4.17309900 | H                          | -1.67998800 | -7.20801600 | -6.14115700 |
| O                          | 3.58016000  | -2.10680200 | -6.36430200 | <b>INT-1b<sup>II</sup></b> |             |             |             |
| C                          | 2.72576200  | -6.05430300 | -6.72308100 | C                          | 1.43740800  | -2.79687000 | -5.61248500 |
| H                          | 3.12283600  | -5.81041200 | -7.71051900 | C                          | 0.60599200  | -1.80852200 | -6.48876600 |
| H                          | 3.46701500  | -6.58395600 | -6.12605000 | H                          | 1.23690100  | -1.49932600 | -7.32580300 |
| H                          | 1.82449900  | -6.66154200 | -6.83578000 | H                          | -0.22219900 | -2.37660700 | -6.91569600 |
| C                          | 4.85900300  | -1.47661100 | -6.14361700 | C                          | 0.75497700  | -3.15980500 | -4.26307000 |
| H                          | 5.39651400  | -1.57592600 | -7.08591300 | H                          | 1.46731400  | -3.71299500 | -3.64750100 |
| H                          | 4.70224500  | -0.42607200 | -5.89593400 | H                          | 0.53572900  | -2.23774000 | -3.71751200 |
| H                          | 5.39478700  | -1.97945200 | -5.33576500 | C                          | 0.02362700  | -0.57670800 | -5.81807400 |
| S                          | 1.08193600  | 1.04820300  | -5.76324700 | C                          | -1.21245100 | -0.44210300 | -5.40376600 |

|   |             |             |             |                            |              |             |             |
|---|-------------|-------------|-------------|----------------------------|--------------|-------------|-------------|
| C | -2.45190700 | -0.23035500 | -5.04111200 | H                          | 2.47460500   | 0.19307000  | -3.42459900 |
| H | -3.13405400 | 0.11659700  | -5.82176800 | C                          | 0.10582300   | 3.15946000  | -2.56057300 |
| C | -3.08146400 | -0.43910700 | -3.66884500 | H                          | -0.46092200  | 3.09193300  | -4.65405800 |
| C | -4.12794900 | -1.59216900 | -3.84850300 | C                          | 0.91082600   | 2.59101100  | -1.57033400 |
| H | -4.86952700 | -1.27920800 | -4.59655800 | H                          | 2.39302900   | 1.09284500  | -1.10795300 |
| H | -3.60630300 | -2.45781300 | -4.27735900 | H                          | -0.54357900  | 3.99661300  | -2.32266400 |
| C | -4.80250600 | -2.00033300 | -2.61708100 | H                          | 0.88062600   | 2.98362700  | -0.55810500 |
| C | -5.33194400 | -2.36674600 | -1.59130700 | C                          | -3.80193800  | 0.86100100  | -3.25709500 |
| C | -5.96341000 | -2.86631700 | -0.36858100 | H                          | -4.51585500  | 1.18227000  | -4.02374600 |
| C | -6.09381500 | -4.40496500 | -0.34256300 | H                          | -4.35419200  | 0.70126300  | -2.32625800 |
| H | -6.95671900 | -2.41040600 | -0.25358300 | H                          | -3.08225400  | 1.67037700  | -3.10128800 |
| H | -5.37686800 | -2.53819600 | 0.50071800  | C                          | -2.03992300  | -0.82094000 | -2.60852400 |
| C | -6.72673200 | -4.91971500 | 0.95518400  | H                          | -1.54184000  | -1.76076100 | -2.86517300 |
| H | -6.69676100 | -4.72409000 | -1.20226800 | H                          | -1.27756600  | -0.04299700 | -2.50851200 |
| H | -5.10074200 | -4.85015900 | -0.47676100 | H                          | -2.52611700  | -0.95843700 | -1.63969900 |
| C | -6.86821300 | -6.44484900 | 0.98318300  | Rh                         | -1.40033800  | -5.33927000 | -3.13888100 |
| H | -6.11696700 | -4.59345700 | 1.80887800  | Cl                         | -2.27869900  | -6.15066600 | -1.13165000 |
| H | -7.71389500 | -4.45565300 | 1.09071900  | C                          | -0.39761500  | -6.79305300 | -3.47813000 |
| H | -7.31796400 | -6.78667900 | 1.92121000  | O                          | 0.26016100   | -7.70397000 | -3.73982400 |
| H | -7.50201400 | -6.79840800 | 0.16187500  | <b>INT-1a<sup>12</sup></b> |              |             |             |
| H | -5.89295200 | -6.93282500 | 0.88118700  | C                          | -0.40638200  | -2.57298800 | -6.24323500 |
| C | -0.47887300 | -3.95985400 | -4.43509600 | C                          | -1.73159500  | -1.91924800 | -6.74164500 |
| C | -1.44599400 | -4.48157700 | -5.06026600 | H                          | -1.46532500  | -1.13491900 | -7.45390900 |
| C | -2.31643100 | -4.77218000 | -6.21771400 | H                          | -2.25549500  | -2.69446200 | -7.30576400 |
| H | -3.24665200 | -5.26182800 | -5.92088400 | C                          | -0.65847300  | -3.75239600 | -5.25382700 |
| H | -2.56279300 | -3.84025200 | -6.73869200 | H                          | 0.27701200   | -3.96849900 | -4.72963100 |
| H | -1.78683900 | -5.42017400 | -6.92424300 | H                          | -1.36879100  | -3.41847700 | -4.48996300 |
| C | 1.62364200  | -4.09714800 | -6.42184300 | C                          | -2.71845400  | -1.34201500 | -5.73788600 |
| O | 1.06338600  | -4.36656000 | -7.46087500 | C                          | -3.88089800  | -1.88058800 | -5.39097300 |
| O | 2.46658000  | -4.92884000 | -5.78297100 | C                          | -5.17704100  | -1.81661700 | -4.89060400 |
| C | 2.82764700  | -2.21531300 | -5.29888200 | H                          | -5.87538500  | -1.25992600 | -5.52876500 |
| O | 3.18407900  | -1.84683500 | -4.19922800 | C                          | -5.69030200  | -1.94781300 | -3.45088700 |
| O | 3.58487200  | -2.18227200 | -6.39955700 | C                          | -6.92172400  | -2.91482100 | -3.44542200 |
| C | 2.70892600  | -6.19515700 | -6.42655000 | H                          | -7.63714500  | -2.57904800 | -4.20875800 |
| H | 3.07986600  | -6.04015100 | -7.44178800 | H                          | -6.59742200  | -3.91354400 | -3.75924500 |
| H | 3.45630200  | -6.69564500 | -5.81236400 | C                          | -7.59747700  | -3.01224800 | -2.15163100 |
| H | 1.78976300  | -6.78447200 | -6.46398200 | C                          | -8.15167600  | -3.09796400 | -1.07837900 |
| C | 4.86525200  | -1.53149300 | -6.26590400 | C                          | -8.85334800  | -3.23007400 | 0.19997600  |
| H | 5.35921200  | -1.66479200 | -7.22765300 | C                          | -10.08789200 | -4.15396800 | 0.12501400  |
| H | 4.70878900  | -0.47283800 | -6.05444900 | H                          | -9.16517700  | -2.23644900 | 0.55074000  |
| H | 5.44444600  | -1.99450000 | -5.46424600 | H                          | -8.15948100  | -3.61445200 | 0.96043600  |
| S | 1.03270700  | 0.95787900  | -5.83604900 | C                          | -10.80970700 | -4.28299500 | 1.47125500  |
| O | 2.41179400  | 0.53631600  | -6.14545100 | H                          | -10.77898900 | -3.76535400 | -0.63314600 |
| O | 0.35461800  | 1.94444200  | -6.69100200 | H                          | -9.77120000  | -5.14423200 | -0.22497900 |
| C | 0.98858700  | 1.58697000  | -4.15022700 | C                          | -12.03610400 | -5.19873000 | 1.40642500  |
| C | 1.81074000  | 1.01459000  | -3.17567400 | H                          | -10.10646900 | -4.66354200 | 2.22471100  |
| C | 0.14045900  | 2.65836100  | -3.86291200 | H                          | -11.11445000 | -3.28546900 | 1.81648700  |
| C | 1.76101700  | 1.52528800  | -1.87764800 | H                          | -12.53257900 | -5.27018100 | 2.37949600  |

|    |              |             |             |                            |              |             |             |
|----|--------------|-------------|-------------|----------------------------|--------------|-------------|-------------|
| H  | -12.77094100 | -4.82566400 | 0.68419900  | H                          | -1.25801000  | -6.16717100 | -9.25218100 |
| H  | -11.75758200 | -6.21311400 | 1.09955400  | H                          | -2.22763400  | -7.64815200 | -9.41528500 |
| C  | -1.13008500  | -4.96071800 | -5.93407600 | H                          | -2.97793600  | -6.15279800 | -8.82314500 |
| C  | -1.42399000  | -5.95367100 | -6.56476100 | H                          | -0.63085800  | -8.96476100 | -7.95014500 |
| C  | 0.32302000   | -3.11800400 | -7.48974400 | H                          | 0.40540300   | -7.53222900 | -7.80047000 |
| O  | -0.09480100  | -3.08363900 | -8.62353200 | H                          | -0.17162800  | -8.36163700 | -6.34465700 |
| O  | 1.50309800   | -3.66164500 | -7.13427300 | C                          | -4.35921100  | -4.76118200 | -4.99478600 |
| C  | 0.51502900   | -1.54277400 | -5.57690200 | O                          | -4.07681400  | -5.57484100 | -4.23145100 |
| O  | 0.66996500   | -1.43627900 | -4.37571800 | Cl                         | -5.63662800  | -5.03517300 | -7.80722100 |
| O  | 1.13063400   | -0.78317700 | -6.48659700 | <b>INT-1b<sup>12</sup></b> |              |             |             |
| C  | 2.27283400   | -4.22371200 | -8.21050500 | C                          | -0.26081000  | -2.53831000 | -6.12231200 |
| H  | 2.49522400   | -3.46079900 | -8.96025600 | C                          | -1.61019600  | -1.97139100 | -6.65887500 |
| H  | 3.19002400   | -4.59390700 | -7.75322400 | H                          | -1.37317700  | -1.20895300 | -7.40456900 |
| H  | 1.72325200   | -5.04031900 | -8.68491000 | H                          | -2.09170900  | -2.79446700 | -7.19153100 |
| C  | 1.92123800   | 0.30784700  | -5.97572800 | C                          | -0.45980000  | -3.64133200 | -5.04157400 |
| H  | 2.40704200   | 0.74557000  | -6.84698800 | H                          | 0.50566100   | -3.83603600 | -4.56575600 |
| H  | 1.26351400   | 1.03471800  | -5.49688700 | H                          | -1.11498200  | -3.24388300 | -4.25902000 |
| H  | 2.66108200   | -0.05979600 | -5.26157500 | C                          | -2.63670300  | -1.39645100 | -5.69488800 |
| S  | -2.54002600  | 0.46310300  | -5.37644200 | C                          | -3.78448100  | -1.96944700 | -5.35298600 |
| O  | -1.23797400  | 0.85869100  | -5.94454400 | C                          | -5.09826900  | -1.94280400 | -4.89859500 |
| O  | -3.77175100  | 1.11906500  | -5.85137500 | H                          | -5.79653700  | -1.44277300 | -5.58148800 |
| C  | -2.47694800  | 0.72356500  | -3.58947200 | C                          | -5.64870500  | -2.02934700 | -3.46902700 |
| C  | -1.59144700  | 0.01177100  | -2.77680700 | C                          | -6.84006700  | -3.04485000 | -3.44889300 |
| C  | -3.26861400  | 1.75659100  | -3.08003300 | H                          | -7.54517400  | -2.77581000 | -4.24738500 |
| C  | -1.52518700  | 0.33083900  | -1.41915400 | H                          | -6.46811600  | -4.04368600 | -3.70303100 |
| H  | -0.95241900  | -0.76142400 | -3.18779200 | C                          | -7.54944600  | -3.10619200 | -2.17091800 |
| C  | -3.18026800  | 2.07150300  | -1.72334800 | C                          | -8.13121000  | -3.16010700 | -1.11025800 |
| H  | -3.93687100  | 2.29477400  | -3.74301200 | C                          | -8.86584000  | -3.25257100 | 0.15296200  |
| C  | -2.31454500  | 1.35640600  | -0.89347000 | C                          | -10.08990400 | -4.19041000 | 0.07944500  |
| H  | -0.84516700  | -0.21918600 | -0.77583300 | H                          | -9.19584700  | -2.24972400 | 0.45799400  |
| H  | -3.78963600  | 2.87323600  | -1.31735100 | H                          | -8.18961500  | -3.60164100 | 0.94562200  |
| H  | -2.25143300  | 1.60109800  | 0.16281600  | C                          | -10.85045800 | -4.27160200 | 1.40795900  |
| C  | -6.17465200  | -0.53685800 | -3.03698600 | H                          | -10.76132700 | -3.83920300 | -0.71382000 |
| H  | -6.95135200  | -0.16871300 | -3.71612400 | H                          | -9.75483600  | -5.19097200 | -0.22057800 |
| H  | -6.60100000  | -0.58178300 | -2.03119100 | C                          | -12.06670400 | -5.20090100 | 1.34443700  |
| H  | -5.35221800  | 0.17968900  | -3.03741800 | H                          | -10.16706900 | -4.61438100 | 2.19695500  |
| C  | -4.61267900  | -2.43381200 | -2.47133200 | H                          | -11.17378300 | -3.26379800 | 1.70271000  |
| H  | -4.24719100  | -3.43325200 | -2.72008200 | H                          | -12.59192800 | -5.23688600 | 2.30428200  |
| H  | -3.75967000  | -1.75124000 | -2.45204400 | H                          | -12.78225400 | -4.86499000 | 0.58555300  |
| H  | -5.03368400  | -2.48305300 | -1.46369100 | H                          | -11.77058600 | -6.22440500 | 1.08847300  |
| Rh | -4.86777800  | -3.52564500 | -6.21197600 | C                          | -0.99889300  | -4.88212900 | -5.59952200 |
| C  | -1.71048400  | -7.16749300 | -7.35478800 | C                          | -1.39308800  | -5.90629500 | -6.11224200 |
| C  | -2.89094500  | -7.94841700 | -6.73239700 | C                          | 0.47709400   | -3.15027300 | -7.33218700 |
| C  | -2.06511700  | -6.75385600 | -8.80327200 | O                          | 0.05961000   | -3.19136600 | -8.46555200 |
| C  | -0.44608900  | -8.06040600 | -7.36022900 | O                          | 1.66525300   | -3.65438400 | -6.94548600 |
| H  | -2.68035800  | -8.22083000 | -5.69360400 | C                          | 0.63038600   | -1.43000700 | -5.54481300 |
| H  | -3.81006400  | -7.35753500 | -6.75990900 | O                          | 0.80377200   | -1.23890900 | -4.35691900 |
| H  | -3.06392900  | -8.86915500 | -7.30026400 | O                          | 1.19872600   | -0.70999500 | -6.51564600 |

|                             |             |             |             |   |             |             |              |
|-----------------------------|-------------|-------------|-------------|---|-------------|-------------|--------------|
| C                           | 2.44083500  | -4.27093000 | -7.98812100 | C | -2.14829400 | -2.46737300 | -4.93364100  |
| H                           | 2.66497700  | -3.54723200 | -8.77528400 | H | -1.68879700 | -2.06117400 | -5.83577100  |
| H                           | 3.35679200  | -4.61452200 | -7.50820700 | C | -3.47353200 | -3.16697700 | -5.16075900  |
| H                           | 1.89409800  | -5.11160300 | -8.42149700 | C | -3.39160700 | -4.19217900 | -6.31503800  |
| C                           | 1.95311000  | 0.44315400  | -6.09338800 | H | -3.14959800 | -3.66612100 | -7.24884500  |
| H                           | 2.40842200  | 0.83891100  | -7.00045600 | H | -2.55038200 | -4.87253000 | -6.12810700  |
| H                           | 1.27415900  | 1.17468400  | -5.65264300 | C | -4.62689300 | -4.95808000 | -6.47799800  |
| H                           | 2.71706400  | 0.15366500  | -5.36882400 | C | -5.65566100 | -5.58798300 | -6.58182300  |
| S                           | -2.53054300 | 0.42531500  | -5.39692200 | C | -6.88707600 | -6.36191200 | -6.75183900  |
| O                           | -1.23759700 | 0.84762200  | -5.96690300 | C | -6.87882300 | -7.25324100 | -8.01199700  |
| O                           | -3.78122200 | 1.01840800  | -5.90365500 | H | -7.74511600 | -5.67675500 | -6.79781200  |
| C                           | -2.49238600 | 0.74686900  | -3.61952200 | H | -7.05124300 | -6.98972600 | -5.86496200  |
| C                           | -1.55137800 | 0.13438100  | -2.78798600 | C | -8.17467200 | -8.05555200 | -8.17734800  |
| C                           | -3.36615500 | 1.72550600  | -3.13838900 | H | -6.71618400 | -6.62138200 | -8.89395300  |
| C                           | -1.51537300 | 0.49413000  | -1.43953800 | H | -6.02159900 | -7.93589800 | -7.95992000  |
| H                           | -0.84613300 | -0.59100100 | -3.17783700 | C | -8.17254500 | -8.94439300 | -9.42496400  |
| C                           | -3.30814200 | 2.08276800  | -1.79050900 | H | -8.33352900 | -8.67645600 | -7.28497200  |
| H                           | -4.07146900 | 2.19223100  | -3.81694700 | H | -9.02674700 | -7.36341900 | -8.22133100  |
| C                           | -2.38922000 | 1.46364400  | -0.94129800 | H | -9.10885700 | -9.50396700 | -9.51771200  |
| H                           | -0.79251100 | 0.02118100  | -0.78178700 | H | -8.04941200 | -8.34809900 | -10.33604000 |
| H                           | -3.98174400 | 2.84311800  | -1.40702700 | H | -7.35257700 | -9.67060100 | -9.39256300  |
| H                           | -2.34937200 | 1.74052800  | 0.10814900  | C | -2.06314700 | -4.28060400 | -2.01906700  |
| C                           | -6.20183400 | -0.62237600 | -3.13613500 | C | -2.06258800 | -5.27326000 | -2.74223900  |
| H                           | -6.97322600 | -0.31921600 | -3.85243600 | C | -0.36693200 | -3.01912600 | 0.37077000   |
| H                           | -6.65374200 | -0.63755700 | -2.14069900 | O | 0.81843500  | -2.91916300 | 0.16223800   |
| H                           | -5.40917800 | 0.12661000  | -3.14974700 | O | -0.90114400 | -3.79366100 | 1.33650700   |
| C                           | -4.57898700 | -2.42141000 | -2.43967100 | C | -2.26629800 | -1.40968200 | 0.57199100   |
| H                           | -4.16029700 | -3.41207500 | -2.63394200 | O | -3.47472000 | -1.40694900 | 0.68550400   |
| H                           | -3.75893200 | -1.69914300 | -2.42894800 | O | -1.44092400 | -0.62468700 | 1.27259000   |
| H                           | -5.02586900 | -2.44644200 | -1.44231300 | C | 0.05022300  | -4.52365500 | 2.13625300   |
| Rh                          | -4.65940100 | -3.69669300 | -6.12907700 | H | 0.71454600  | -3.83238200 | 2.65973700   |
| C                           | -1.88688100 | -7.13831900 | -6.72137500 | H | -0.54464900 | -5.09832400 | 2.84541400   |
| C                           | -4.20805700 | -4.86269800 | -4.82365800 | H | 0.64785400  | -5.18477700 | 1.50502900   |
| O                           | -3.97788000 | -5.64329900 | -4.00962200 | C | -2.07635200 | 0.37377000  | 2.09735500   |
| Cl                          | -5.24300600 | -5.33119000 | -7.68451000 | H | -1.26320200 | 0.88462200  | 2.61131000   |
| H                           | -1.17924500 | -7.51980400 | -7.46552500 | H | -2.63021600 | 1.06800200  | 1.46234500   |
| H                           | -2.03305000 | -7.91925100 | -5.96689700 | H | -2.75398800 | -0.09688800 | 2.81264400   |
| H                           | -2.84541000 | -6.96564100 | -7.22351900 | S | -2.56442800 | 0.46417900  | -2.76413200  |
| <b>INT-1b<sup>10H</sup></b> |             |             |             | O | -2.51099100 | 1.00322300  | -1.39130800  |
| C                           | -1.47812000 | -2.29463000 | -0.41675700 | O | -2.05015000 | 1.25001100  | -3.89735100  |
| C                           | -0.80077200 | -1.38173000 | -1.48979900 | C | -4.27973700 | 0.05659800  | -3.13525300  |
| H                           | -0.50215100 | -0.44696800 | -1.01408000 | C | -5.10507600 | -0.45154700 | -2.12755400  |
| H                           | 0.11072400  | -1.88602000 | -1.81659100 | C | -4.75995100 | 0.30806700  | -4.42177400  |
| C                           | -2.49768100 | -3.31485300 | -0.99222700 | C | -6.43578100 | -0.73825300 | -2.43538500  |
| H                           | -2.88569300 | -3.90432200 | -0.15620000 | H | -4.72071800 | -0.60838000 | -1.12454300  |
| H                           | -3.34698300 | -2.74996500 | -1.38343200 | C | -6.09550400 | 0.02224400  | -4.71174200  |
| C                           | -1.65832100 | -1.11865900 | -2.70461000 | H | -4.09631800 | 0.73670500  | -5.16477500  |
| C                           | -1.71627700 | -1.95235000 | -3.72732200 | C | -6.92844000 | -0.50567200 | -3.72236800  |

|             |             |             |             |    |             |             |             |
|-------------|-------------|-------------|-------------|----|-------------|-------------|-------------|
| H           | -7.09024000 | -1.13372600 | -1.66450500 | O  | -2.07249700 | -7.18483300 | -5.26371000 |
| H           | -6.48519700 | 0.21889000  | -5.70603500 | C  | -0.42178300 | -4.95697600 | -6.40865500 |
| H           | -7.96658000 | -0.72746000 | -3.95188300 | O  | 0.56137200  | -4.36528700 | -6.01034300 |
| Rh          | -0.61443700 | -3.71311100 | -3.91117100 | O  | -0.43837800 | -5.71417600 | -7.51493500 |
| C           | 0.71344800  | -2.95492100 | -4.99511500 | C  | -2.75941200 | -8.45008600 | -5.38236300 |
| O           | 1.54211300  | -2.50266500 | -5.64538400 | H  | -2.73452000 | -8.79782600 | -6.41744300 |
| Cl          | 1.01082100  | -5.44523200 | -3.56076200 | H  | -2.21667700 | -9.13518200 | -4.73160200 |
| C           | -2.20282900 | -6.58560200 | -3.38099400 | H  | -3.79393700 | -8.33244000 | -5.05362500 |
| H           | -4.22770800 | -2.40799700 | -5.40724900 | C  | 0.80114500  | -5.78785400 | -8.24678400 |
| H           | -3.80799100 | -3.65936100 | -4.24545500 | H  | 0.59613500  | -6.43328600 | -9.09972300 |
| H           | -1.22245900 | -6.97311200 | -3.66675200 | H  | 1.10464000  | -4.79276200 | -8.57960600 |
| H           | -2.84097900 | -6.52860200 | -4.26850400 | H  | 1.58810000  | -6.21243700 | -7.61960200 |
| H           | -2.66561800 | -7.27891800 | -2.66939300 | S  | -2.63216700 | -0.88070000 | -6.34269300 |
| <b>TS1a</b> |             |             |             | O  | -2.31535800 | -1.13476300 | -7.76019500 |
| C           | -1.81121400 | -4.86984200 | -5.75638600 | O  | -3.75189700 | 0.01208500  | -5.98747100 |
| C           | -2.57467800 | -3.69952400 | -6.46839700 | C  | -1.14936300 | -0.21361100 | -5.55987000 |
| H           | -2.00434800 | -3.33327800 | -7.32296700 | C  | 0.02281300  | -0.97353900 | -5.50844300 |
| H           | -3.48741400 | -4.12518500 | -6.89098600 | C  | -1.18851800 | 1.09947700  | -5.08802900 |
| C           | -1.59679600 | -4.61983500 | -4.24516000 | C  | 1.16743300  | -0.40700300 | -4.94762200 |
| H           | -1.07213500 | -5.47812900 | -3.81649400 | H  | 0.05737800  | -1.98984500 | -5.88671700 |
| H           | -0.94180700 | -3.74938300 | -4.14419700 | C  | -0.03181600 | 1.65754900  | -4.54080300 |
| C           | -2.93746800 | -2.52282100 | -5.59472100 | H  | -2.11084800 | 1.66517300  | -5.15712000 |
| C           | -3.58324700 | -2.55679600 | -4.42954800 | C  | 1.14148700  | 0.90489200  | -4.46637500 |
| C           | -4.36552500 | -1.83007300 | -3.51831800 | H  | 2.07973900  | -0.99289700 | -4.89275300 |
| H           | -5.17331500 | -1.30202900 | -4.02289900 | H  | -0.05054200 | 2.67863000  | -4.17199100 |
| C           | -3.89248400 | -1.07120300 | -2.25720000 | H  | 2.03780300  | 1.34042600  | -4.03454500 |
| C           | -4.77269600 | -1.48094600 | -1.03476100 | C  | -4.12675400 | 0.43174100  | -2.54106000 |
| H           | -5.82728000 | -1.32198200 | -1.29650300 | H  | -5.18906200 | 0.63932900  | -2.71350800 |
| H           | -4.65933800 | -2.55641500 | -0.87112700 | H  | -3.80313000 | 1.02680800  | -1.68218700 |
| C           | -4.47369200 | -0.76508200 | 0.20661000  | H  | -3.57760300 | 0.75295500  | -3.42769100 |
| C           | -4.23041500 | -0.18738700 | 1.24306100  | C  | -2.40215900 | -1.29431000 | -1.95113100 |
| C           | -3.96607300 | 0.52595300  | 2.49403200  | H  | -2.17614500 | -2.34689800 | -1.77867200 |
| C           | -4.73649500 | 1.85760700  | 2.61927900  | H  | -1.77867400 | -0.94180500 | -2.77751400 |
| H           | -2.88814700 | 0.72075800  | 2.58352800  | H  | -2.12362000 | -0.73421600 | -1.05384900 |
| H           | -4.22441400 | -0.12242200 | 3.34299100  | Rh | -5.00475400 | -3.94867000 | -3.64523700 |
| C           | -4.44976000 | 2.58320500  | 3.93859200  | Cl | -5.65302700 | -6.34201100 | -3.94292800 |
| H           | -4.47242700 | 2.50394000  | 1.77284700  | C  | -6.70062100 | -3.76371000 | -2.63672300 |
| H           | -5.81140400 | 1.65712700  | 2.52990400  | O  | -7.64809400 | -3.65033600 | -2.00313600 |
| C           | -5.20875100 | 3.90737200  | 4.07142200  | C  | -6.58761800 | -3.80238200 | -8.04924000 |
| H           | -4.71097500 | 1.92476600  | 4.77832700  | C  | -6.50723300 | -4.43373400 | -6.66606100 |
| H           | -3.37023100 | 2.76921200  | 4.02319400  | C  | -7.27441100 | -2.39899500 | -5.73065000 |
| H           | -4.98502400 | 4.40270300  | 5.02178000  | C  | -7.33696200 | -1.78854600 | -7.12549200 |
| H           | -4.94207300 | 4.59937600  | 3.26457800  | O  | -6.24404500 | -3.40042000 | -5.68651000 |
| H           | -6.29222600 | 3.74955000  | 4.02559000  | O  | -7.59109900 | -2.79203500 | -8.09779700 |
| C           | -2.85231100 | -4.41119300 | -3.48635400 | H  | -7.02428500 | -1.64266300 | -4.98297900 |
| C           | -3.51486300 | -4.67450300 | -2.41859900 | H  | -8.23891400 | -2.85919300 | -5.47019000 |
| C           | -2.57160500 | -6.19123100 | -6.01232300 | H  | -8.15633900 | -1.06546000 | -7.18873000 |
| O           | -3.48212300 | -6.32313100 | -6.79929600 | H  | -6.38894800 | -1.26861700 | -7.33630500 |

|               |             |             |             |    |             |             |             |
|---------------|-------------|-------------|-------------|----|-------------|-------------|-------------|
| H             | -7.45161400 | -4.93109800 | -6.41052100 | C  | 1.19415400  | -1.67400900 | 0.57488900  |
| H             | -5.69739200 | -5.15926400 | -6.59058300 | C  | 0.30553700  | -2.45570100 | 1.24034200  |
| H             | -5.60901000 | -3.37681800 | -8.32418400 | C  | 1.38407600  | -2.87582400 | -2.08320000 |
| H             | -6.85996000 | -4.55775200 | -8.79244600 | O  | 0.41913500  | -2.47438900 | -2.69568800 |
| C             | -3.44260800 | -5.41241300 | -1.10118100 | O  | 1.62364200  | -4.16549300 | -1.80354100 |
| C             | -2.46089100 | -4.68537200 | -0.15159300 | C  | 3.84641000  | -2.40821100 | -2.08343600 |
| C             | -4.81670800 | -5.54669400 | -0.41894700 | O  | 4.84756200  | -2.62011000 | -1.43704200 |
| C             | -2.89831500 | -6.83121400 | -1.40748200 | O  | 3.78571100  | -2.48173400 | -3.42719400 |
| H             | -1.47016700 | -4.58114900 | -0.60523500 | C  | 0.61942100  | -5.10271900 | -2.26138300 |
| H             | -2.81872100 | -3.68936700 | 0.12294800  | H  | 0.50107500  | -5.02342500 | -3.34427500 |
| H             | -2.35024100 | -5.26585200 | 0.77090300  | H  | 0.99985200  | -6.08601900 | -1.98668900 |
| H             | -5.52052200 | -6.07575100 | -1.06529500 | H  | -0.33330600 | -4.89894800 | -1.76730900 |
| H             | -4.70447400 | -6.11249400 | 0.51199200  | C  | 5.00863700  | -2.86123900 | -4.08561000 |
| H             | -5.23948500 | -4.57083500 | -0.16210900 | H  | 4.77530100  | -2.87599700 | -5.14963500 |
| H             | -2.82527200 | -7.40352700 | -0.47568500 | H  | 5.79781500  | -2.13607200 | -3.87324600 |
| H             | -3.56618500 | -7.35498400 | -2.09456600 | H  | 5.33240300  | -3.84827100 | -3.74748300 |
| H             | -1.90025500 | -6.78712100 | -1.85463900 | S  | 0.62076000  | 1.72180500  | -1.76671900 |
| <b>INT-2a</b> |             |             |             | O  | 0.12053600  | 1.38093700  | -3.11304800 |
| C             | 2.49424100  | -1.97825200 | -1.50045900 | O  | -0.24669500 | 2.47830900  | -0.84176200 |
| C             | 2.22819000  | -0.50575400 | -1.89079700 | C  | 2.12054200  | 2.69864200  | -2.00968300 |
| H             | 3.17495900  | 0.04745800  | -1.83907500 | C  | 2.68462000  | 2.76199100  | -3.28521100 |
| H             | 1.89270600  | -0.47820700 | -2.93031300 | C  | 2.67019100  | 3.40071200  | -0.93373200 |
| C             | 2.52895100  | -2.12260200 | 0.04242100  | C  | 3.82907200  | 3.53689700  | -3.48164200 |
| H             | 2.75765000  | -3.15272100 | 0.31345900  | H  | 2.21612100  | 2.22553900  | -4.10307100 |
| H             | 3.33889500  | -1.48925900 | 0.42214800  | C  | 3.81568100  | 4.16800500  | -1.14200600 |
| C             | 1.19566600  | 0.18633900  | -1.01553200 | H  | 2.20123700  | 3.35735700  | 0.04261100  |
| C             | 0.69411100  | -0.34389100 | 0.13792100  | C  | 4.39483600  | 4.23425600  | -2.41244300 |
| C             | -0.44789000 | 0.15091300  | 0.98547200  | H  | 4.27369600  | 3.59934900  | -4.47031500 |
| H             | -1.05189000 | 0.86722900  | 0.43353900  | H  | 4.25119700  | 4.72057200  | -0.31498200 |
| C             | -0.14702900 | 0.76130800  | 2.38655500  | H  | 5.28487000  | 4.83650600  | -2.56954500 |
| C             | -1.49532900 | 1.36123200  | 2.90749100  | C  | 0.85173700  | 1.93150900  | 2.20579700  |
| H             | -1.86768800 | 2.06956600  | 2.15481100  | H  | 0.47892900  | 2.65412500  | 1.47624400  |
| H             | -2.24447900 | 0.56341700  | 2.97553800  | H  | 0.99769600  | 2.44242200  | 3.16210900  |
| C             | -1.41627400 | 2.04062800  | 4.20145500  | H  | 1.82364100  | 1.56136700  | 1.86349100  |
| C             | -1.36462200 | 2.59816100  | 5.27524200  | C  | 0.43615000  | -0.19739300 | 3.43816900  |
| C             | -1.31675000 | 3.30115200  | 6.55889900  | H  | -0.22986300 | -1.03858500 | 3.64741000  |
| C             | -1.33472700 | 4.83774000  | 6.41795800  | H  | 1.40176300  | -0.60080300 | 3.12411000  |
| H             | -0.41497600 | 2.99757600  | 7.10894200  | H  | 0.58381500  | 0.34527000  | 4.37627100  |
| H             | -2.16651000 | 2.98369300  | 7.17934800  | Rh | -1.43898500 | -1.70529800 | 0.67913400  |
| C             | -1.29301900 | 5.55795600  | 7.77042600  | Cl | -2.35027000 | -3.88354200 | -0.11369800 |
| H             | -0.48105500 | 5.14917100  | 5.80293500  | C  | -2.31201200 | -1.88147000 | 2.26327000  |
| H             | -2.23545700 | 5.13381100  | 5.86591500  | O  | -2.87839300 | -2.07511800 | 3.24755000  |
| C             | -1.31135400 | 7.08390200  | 7.63673400  | C  | 0.49714700  | -3.74098600 | 1.96315300  |
| H             | -2.14692000 | 5.23326100  | 8.38074600  | H  | -0.18086200 | -4.50489500 | 1.57179300  |
| H             | -0.39288600 | 5.24851400  | 8.31927000  | H  | 1.53286300  | -4.09160400 | 1.89454200  |
| H             | -1.28219100 | 7.57125500  | 8.61667100  | H  | 0.26397700  | -3.60862900 | 3.02719500  |
| H             | -0.45006200 | 7.44174800  | 7.06125200  | C  | -3.15097100 | -0.21179400 | -3.27586900 |
| H             | -2.21656400 | 7.42536900  | 7.12199800  | C  | -2.98981800 | -1.27508800 | -2.20000600 |

|             |             |             |             |   |             |             |             |
|-------------|-------------|-------------|-------------|---|-------------|-------------|-------------|
| C           | -3.82121900 | 0.28981900  | -0.59787900 | C | -2.33716300 | 5.36035800  | -1.36783100 |
| C           | -3.96794700 | 1.31872300  | -1.71252500 | H | -0.85278500 | 4.74314000  | 0.08913500  |
| O           | -2.75633200 | -0.62762600 | -0.91902800 | C | -3.94388300 | 3.66058300  | -1.99698400 |
| O           | -4.22124400 | 0.67697800  | -2.95299900 | H | -3.72873700 | 1.74173800  | -1.02987500 |
| H           | -3.55273400 | 0.76544500  | 0.34852800  | C | -3.44613300 | 4.96109700  | -2.11653000 |
| H           | -4.75241000 | -0.27945300 | -0.47038700 | H | -1.95481600 | 6.37308700  | -1.45508500 |
| H           | -4.82078700 | 1.97404500  | -1.50730800 | H | -4.80985900 | 3.35310400  | -2.57565200 |
| H           | -3.05403000 | 1.92967200  | -1.76794100 | H | -3.92572900 | 5.66460800  | -2.79103700 |
| H           | -3.88711400 | -1.89869300 | -2.11541400 | C | 1.11367300  | 1.54665500  | -2.69567100 |
| H           | -2.12475900 | -1.91195300 | -2.38730300 | C | 2.58671800  | 2.00618700  | -2.58201800 |
| H           | -2.21146400 | 0.34541700  | -3.39718600 | C | 1.00901400  | 0.38256100  | -3.68605800 |
| H           | -3.40944700 | -0.68577100 | -4.22776700 | H | 1.73613800  | -0.40159100 | -3.47100600 |
| <b>TS2a</b> |             |             |             | H | 0.01269400  | -0.06797300 | -3.67706900 |
| C           | -0.03690000 | 0.16547600  | -0.70952000 | H | 1.19521200  | 0.75747700  | -4.69910700 |
| C           | 0.14861800  | -1.26773500 | -1.10945900 | C | 0.13101400  | 2.65377700  | -3.09023700 |
| Rh          | 2.20745000  | -0.35391700 | 0.26451200  | H | 0.33284700  | 2.98431600  | -4.11586700 |
| Cl          | 3.22485500  | -1.97146700 | 1.72177000  | H | -0.90428600 | 2.30146500  | -3.05246400 |
| C           | -1.12731300 | -1.98774800 | -1.51269000 | H | 0.21340200  | 3.52304400  | -2.43241200 |
| C           | -1.14473700 | 0.45663200  | 0.03741200  | C | 2.93675800  | 1.09620500  | -1.45907800 |
| H           | -1.44113700 | -1.60442400 | -2.49234800 | C | 3.76388300  | 0.36591800  | -0.80001200 |
| H           | -0.96833500 | -3.05702200 | -1.62117200 | C | 5.21220800  | 0.07924700  | -0.62745200 |
| H           | -5.98980200 | -2.07646300 | -2.20005800 | C | 6.10610600  | 0.80295300  | -1.65101000 |
| C           | -5.13341200 | -2.33631500 | -2.82652100 | H | 5.36642900  | -1.00330700 | -0.68014800 |
| O           | -3.95729000 | -2.52200900 | -2.01819000 | H | 5.49657700  | 0.36374900  | 0.39427300  |
| H           | -5.29751900 | -3.29000800 | -3.32698300 | C | 7.59515300  | 0.49763300  | -1.44303200 |
| H           | -4.97312400 | -1.54074300 | -3.55822000 | H | 5.80926600  | 0.50588800  | -2.66569100 |
| C           | -3.57137900 | -1.45684100 | -1.28872700 | H | 5.93946300  | 1.88597900  | -1.58039900 |
| C           | -2.29773200 | -1.78173900 | -0.49620800 | C | 8.49952600  | 1.21012900  | -2.45342400 |
| O           | -4.15536400 | -0.39476400 | -1.30537700 | H | 7.88380800  | 0.78660700  | -0.42364200 |
| C           | -2.56194300 | -3.08993800 | 0.27641700  | H | 7.75297200  | -0.58701900 | -1.50796600 |
| O           | -1.91591500 | -4.11035800 | 0.20076500  | H | 9.55385900  | 0.97298000  | -2.27919200 |
| O           | -3.62736100 | -2.94006800 | 1.08742200  | H | 8.25771700  | 0.91438900  | -3.48066100 |
| C           | -3.97482700 | -4.09103900 | 1.88049900  | H | 8.38839100  | 2.29845100  | -2.38738700 |
| H           | -3.15267400 | -4.35453500 | 2.54968700  | H | 3.20237500  | 1.86880300  | -3.47775000 |
| H           | -4.85429300 | -3.79667300 | 2.45198100  | H | 2.65594200  | 3.05730700  | -2.27285400 |
| H           | -4.19799900 | -4.94411400 | 1.23560100  | C | 2.54841700  | 0.95697400  | 1.84107500  |
| C           | 1.41699800  | -1.75192100 | -1.01735400 | O | 2.71257000  | 1.56659000  | 2.79043000  |
| C           | 0.98982600  | 1.15827300  | -1.17760200 | C | -0.35733000 | 0.45546600  | 4.24911900  |
| H           | 0.93540700  | 2.07196000  | -0.58999800 | C | -1.63125100 | -0.03349200 | 4.92574600  |
| C           | -2.01529900 | -0.66807300 | 0.55115700  | C | -0.92973400 | -2.25523000 | 4.63778800  |
| H           | -1.48518300 | -1.10960100 | 1.40447700  | C | 0.34629900  | -1.76622600 | 3.96265600  |
| H           | -2.95751500 | -0.28640400 | 0.93875000  | O | -1.41966000 | -1.29273900 | 5.56302400  |
| S           | -1.47088400 | 2.05533600  | 0.81335900  | O | 0.10430300  | -0.51889900 | 3.30651800  |
| O           | -0.18446800 | 2.67809100  | 1.20455300  | H | -1.69408500 | -2.46596400 | 3.86884200  |
| O           | -2.48172700 | 1.80484000  | 1.85808600  | H | -0.74401800 | -3.17388200 | 5.20436900  |
| C           | -2.22233300 | 3.16142800  | -0.39899500 | H | 1.14001700  | -1.64169100 | 4.71498000  |
| C           | -1.71537700 | 4.45802100  | -0.50307300 | H | 0.70278100  | -2.46304300 | 3.20091400  |
| C           | -3.34057300 | 2.75011300  | -1.12823500 | H | -1.95085400 | 0.66368300  | 5.70668600  |

|              |             |             |             |   |             |             |             |
|--------------|-------------|-------------|-------------|---|-------------|-------------|-------------|
| H            | -2.43344300 | -0.11048600 | 4.17540500  | O | 3.56258000  | 2.33677300  | -2.66890200 |
| H            | -0.53712400 | 1.37761500  | 3.69433700  | C | 2.93791900  | 3.55605500  | -0.39649400 |
| H            | 0.42399700  | 0.63143700  | 5.00513800  | C | 2.51796100  | 4.88807300  | -0.36718900 |
| C            | 1.96929500  | -3.08712200 | -1.52120600 | C | 3.81428700  | 3.04853800  | 0.56582700  |
| C            | 1.45996800  | -3.41553800 | -2.94937600 | C | 2.98668200  | 5.72644900  | 0.64544100  |
| C            | 3.51098500  | -3.04179500 | -1.60826500 | H | 1.83350700  | 5.24782400  | -1.12714900 |
| C            | 1.56339300  | -4.22828700 | -0.55305900 | C | 4.26737000  | 3.89592300  | 1.57727600  |
| H            | 0.37916300  | -3.55450500 | -3.00324300 | H | 4.10581800  | 2.00505900  | 0.56427800  |
| H            | 1.73665300  | -2.63282000 | -3.66300200 | C | 3.86021100  | 5.23178200  | 1.61584900  |
| H            | 1.92389100  | -4.34816300 | -3.28907800 | H | 2.66703400  | 6.76389800  | 0.67543900  |
| H            | 3.95328400  | -2.86788900 | -0.62704000 | H | 4.93802000  | 3.50775100  | 2.33792800  |
| H            | 3.88436000  | -3.99757200 | -1.99295600 | H | 4.22041100  | 5.88549700  | 2.40497300  |
| H            | 3.84259300  | -2.25378600 | -2.29364900 | C | -0.77862500 | 1.70898600  | 0.90342400  |
| H            | 1.98078400  | -5.17618000 | -0.91426000 | C | -1.29047600 | 0.38742100  | 1.53874400  |
| H            | 1.95954400  | -4.03648900 | 0.44599400  | C | 0.46374000  | 2.19090100  | 1.67909300  |
| H            | 0.47908000  | -4.33979900 | -0.47889100 | H | 1.28725400  | 1.47508800  | 1.63072800  |
| <b>TS2aa</b> |             |             |             | H | 0.82362600  | 3.14738400  | 1.29288700  |
| C            | 0.67760500  | 0.50888800  | -0.86855900 | H | 0.20423600  | 2.33966300  | 2.73398700  |
| C            | 0.33276100  | -0.92832400 | -0.76066500 | C | -1.85461000 | 2.80432000  | 1.00673700  |
| Rh           | -2.00181200 | 0.37609900  | -1.66909900 | H | -2.05014200 | 3.05408600  | 2.05559400  |
| Cl           | -3.65651200 | -0.78578700 | -3.23985100 | H | -1.51659500 | 3.71595100  | 0.50323300  |
| C            | 1.46921400  | -1.92131900 | -0.94446800 | H | -2.79889000 | 2.50016800  | 0.54856800  |
| C            | 1.94242500  | 0.89185900  | -1.22458500 | C | -2.17769400 | -0.19796200 | 0.49994300  |
| H            | 1.29861400  | -2.84737300 | -0.40495100 | C | -3.29294800 | 0.11484900  | -0.05929500 |
| H            | 1.52855200  | -2.20004400 | -2.00209400 | C | -4.76100600 | 0.25185800  | -0.01055800 |
| H            | 3.88056900  | -1.93404900 | 3.29276300  | C | -5.35421800 | 0.02181800  | 1.39173500  |
| C            | 2.83619400  | -2.13762900 | 3.04538700  | H | -5.18789200 | -0.45132100 | -0.73767100 |
| O            | 2.66744600  | -2.22592700 | 1.61855100  | H | -5.03714400 | 1.24787100  | -0.38311100 |
| H            | 2.52861300  | -3.10648900 | 3.43723200  | C | -6.88195400 | 0.16120200  | 1.40480000  |
| H            | 2.21189900  | -1.34047700 | 3.45572800  | H | -5.07210600 | -0.97862100 | 1.74355400  |
| C            | 3.01832300  | -1.12682300 | 0.92033700  | H | -4.91312500 | 0.73777100  | 2.09771900  |
| C            | 2.85821300  | -1.36863500 | -0.58615700 | C | -7.49008600 | -0.06969900 | 2.79158700  |
| O            | 3.41899800  | -0.10905300 | 1.44378800  | H | -7.15717800 | 1.16120900  | 1.04380900  |
| C            | 3.91888400  | -2.39849100 | -1.01762500 | H | -7.31414500 | -0.55061700 | 0.68936600  |
| O            | 3.72969600  | -3.30559900 | -1.79588600 | H | -8.57937900 | 0.03502900  | 2.76971200  |
| O            | 5.11058400  | -2.12849900 | -0.45150000 | H | -7.25987900 | -1.07470300 | 3.16281600  |
| C            | 6.19287300  | -2.99923900 | -0.83397700 | H | -7.10122500 | 0.65002300  | 3.52095100  |
| H            | 6.35949700  | -2.94706200 | -1.91216300 | H | -0.45989900 | -0.27823800 | 1.78611900  |
| H            | 7.06519200  | -2.63616200 | -0.29183400 | H | -1.86517600 | 0.58589000  | 2.45146200  |
| H            | 5.96664600  | -4.03158500 | -0.55741700 | C | -2.97194000 | 1.98455500  | -2.34620500 |
| C            | -1.00414300 | -1.28825300 | -0.73971800 | O | -3.63197200 | 2.86800600  | -2.65370100 |
| C            | -0.46866100 | 1.44343300  | -0.61367400 | C | -0.65196100 | 1.65147500  | -4.44364000 |
| H            | -0.31636200 | 2.39662700  | -1.11217000 | C | 0.50235400  | 1.70576900  | -5.43572800 |
| C            | 3.09877600  | -0.07521800 | -1.38533100 | C | 0.70510400  | -0.61205300 | -5.37739200 |
| H            | 3.23673700  | -0.33747500 | -2.44144100 | C | -0.45105900 | -0.71210400 | -4.39152100 |
| H            | 4.03540000  | 0.38438800  | -1.06776500 | O | 0.56021500  | 0.51998800  | -6.22100900 |
| S            | 2.39214200  | 2.54832700  | -1.79568100 | O | -0.52383300 | 0.49023200  | -3.59101900 |
| O            | 1.21650200  | 3.24973800  | -2.36031600 | H | 1.66252600  | -0.56044900 | -4.83187000 |



|               |              |             |             |    |              |             |             |
|---------------|--------------|-------------|-------------|----|--------------|-------------|-------------|
| H             | 0.72006500   | -1.49619300 | -6.02277500 | H  | -11.04253600 | -5.18754300 | 4.63217300  |
| H             | -1.40614100  | -0.85280400 | -4.90829700 | H  | -9.38696700  | -4.60704400 | 4.85606400  |
| H             | -0.30494200  | -1.53828200 | -3.69497500 | H  | -10.59809300 | -3.55692500 | 4.11065700  |
| H             | 0.35738600   | 2.54134100  | -6.12741500 | C  | -4.27485600  | -4.23863700 | -1.36415900 |
| H             | 1.44844500   | 1.85822900  | -4.89582700 | C  | -5.03328400  | -5.34895500 | -1.22169500 |
| H             | -0.61966000  | 2.52153200  | -3.78827000 | C  | -2.07822900  | -5.13479200 | -3.74633300 |
| H             | -1.61353400  | 1.59534000  | -4.97126700 | O  | -2.72249300  | -5.64733700 | -4.63513400 |
| C             | -1.52613800  | -2.75167600 | -0.60659400 | O  | -0.95862600  | -5.68194300 | -3.23122000 |
| C             | -1.01020500  | -3.38229900 | 0.71740000  | C  | -1.18672500  | -2.89467500 | -3.10546600 |
| C             | -3.06685200  | -2.88934100 | -0.54513000 | O  | -0.76495500  | -2.20114500 | -2.20697100 |
| C             | -1.09379700  | -3.59568600 | -1.83541900 | O  | -0.65374700  | -2.92387200 | -4.34269100 |
| H             | 0.07508100   | -3.41179500 | 0.82005100  | C  | -0.53072600  | -6.91479800 | -3.83964700 |
| H             | -1.40830400  | -2.82965400 | 1.57500100  | H  | -0.35204000  | -6.76947300 | -4.90746500 |
| H             | -1.37608200  | -4.41235400 | 0.79253300  | H  | 0.39130200   | -7.18826400 | -3.32764800 |
| H             | -3.55209100  | -2.38544000 | -1.38125100 | H  | -1.28830500  | -7.69044000 | -3.70661800 |
| H             | -3.31546700  | -3.95475100 | -0.60154500 | C  | 0.50994600   | -2.10019600 | -4.54421900 |
| H             | -3.47546500  | -2.51349100 | 0.39438000  | H  | 0.81768000   | -2.27843800 | -5.57424900 |
| H             | -1.44332700  | -4.62537400 | -1.70347000 | H  | 0.26350700   | -1.04758600 | -4.39270700 |
| H             | -1.56569200  | -3.20111200 | -2.73956500 | H  | 1.30274300   | -2.38875700 | -3.85005300 |
| H             | -0.01602200  | -3.64234100 | -1.99115700 | S  | -4.95236700  | -0.70880200 | -3.47210300 |
| <b>INT-3a</b> |              |             |             | O  | -5.64364100  | -0.99121200 | -4.74825700 |
| C             | -2.41539100  | -3.81811400 | -3.02604800 | O  | -5.61676800  | 0.11303700  | -2.44695000 |
| C             | -3.62319600  | -3.14124800 | -3.75570900 | C  | -3.40830000  | 0.12402800  | -3.89556700 |
| H             | -3.26787000  | -2.55948200 | -4.60766400 | C  | -3.10362900  | 0.32734700  | -5.24294900 |
| H             | -4.23905500  | -3.95184400 | -4.15949600 | C  | -2.59841700  | 0.63383000  | -2.87771600 |
| C             | -2.76139000  | -4.09882300 | -1.53532700 | C  | -1.96054000  | 1.05673700  | -5.57464900 |
| H             | -2.20474300  | -4.96013800 | -1.18835600 | H  | -3.76827800  | -0.06486900 | -6.00484400 |
| H             | -2.41181700  | -3.23527600 | -0.96565800 | C  | -1.45526200  | 1.35406400  | -3.22141300 |
| C             | -4.47564500  | -2.32500800 | -2.81506700 | H  | -2.85992200  | 0.47839400  | -1.83697400 |
| C             | -4.90862400  | -2.87977900 | -1.64183200 | C  | -1.13983600  | 1.56867800  | -4.56659400 |
| C             | -5.75442200  | -2.18819500 | -0.58710700 | H  | -1.71764000  | 1.23150100  | -6.61842300 |
| H             | -6.31816200  | -1.38670700 | -1.06784100 | H  | -0.81666800  | 1.75356200  | -2.43994700 |
| C             | -5.16975100  | -1.57142600 | 0.77116900  | H  | -0.25542700  | 2.14235100  | -4.82861000 |
| C             | -6.45136400  | -2.11861100 | 1.48787200  | C  | -5.00918800  | -0.05367500 | 0.77979000  |
| H             | -6.28402000  | -2.61684200 | 2.44689900  | H  | -5.89948500  | 0.44978100  | 0.39332100  |
| H             | -7.21652900  | -1.34481200 | 1.62682200  | H  | -4.82857600  | 0.30116600  | 1.80213100  |
| C             | -6.70886900  | -3.00613400 | 0.27393500  | H  | -4.16037800  | 0.26370500  | 0.16467100  |
| C             | -7.36071100  | -4.11654300 | -0.04154700 | C  | -3.91086900  | -2.25750400 | 1.30203600  |
| C             | -8.38409400  | -4.89911900 | 0.73264800  | H  | -4.00499200  | -3.34718700 | 1.28309700  |
| C             | -8.75110100  | -4.32714800 | 2.11435700  | H  | -3.02469600  | -1.97627100 | 0.72311400  |
| H             | -8.04995600  | -5.93444700 | 0.84900900  | H  | -3.73306600  | -1.95189800 | 2.33990200  |
| H             | -9.29438600  | -4.97015300 | 0.12280000  | Rh | -6.84164900  | -4.62561300 | -1.95007200 |
| C             | -9.86587000  | -5.13499300 | 2.79261800  | Cl | -8.11297700  | -6.62725500 | -2.04878600 |
| H             | -7.86616500  | -4.32251200 | 2.76275800  | C  | -8.51838800  | -3.65087400 | -2.60842700 |
| H             | -9.07013600  | -3.28187400 | 2.01398400  | O  | -9.51988600  | -3.14621000 | -2.82733200 |
| C             | -10.24529900 | -4.59273500 | 4.17435100  | C  | -6.36730900  | -4.27609900 | -6.81919000 |
| H             | -10.75251500 | -5.14153400 | 2.14445700  | C  | -6.90358800  | -4.04148800 | -5.41680400 |
| H             | -9.54969600  | -6.18292800 | 2.88344200  | C  | -6.12316800  | -6.29676900 | -5.03474400 |

|                |             |             |             |   |             |             |             |
|----------------|-------------|-------------|-------------|---|-------------|-------------|-------------|
| C              | -6.97141300 | -6.51699600 | -6.27697900 | C | -1.05671300 | -1.35181600 | -0.29691800 |
| O              | -6.31395800 | -4.96802300 | -4.48347400 | C | -0.59351000 | 1.46758000  | -0.53023800 |
| O              | -6.67919400 | -5.58046900 | -7.31006900 | H | -0.41182400 | 2.43283800  | -0.99054000 |
| H              | -6.41045400 | -7.00707500 | -4.25807600 | C | 2.96720500  | -0.01359700 | -1.38122500 |
| H              | -5.05945900 | -6.41381700 | -5.26690000 | H | 3.09352400  | -0.21501200 | -2.45202000 |
| H              | -6.76560900 | -7.51357000 | -6.68182200 | H | 3.90112500  | 0.44404300  | -1.05237000 |
| H              | -8.03876400 | -6.48294200 | -6.01069300 | S | 2.21728000  | 2.59451200  | -1.73093800 |
| H              | -6.64547600 | -3.03738000 | -5.07496500 | O | 1.03726300  | 3.29414300  | -2.28779800 |
| H              | -7.99691600 | -4.14853500 | -5.40936100 | O | 3.39258500  | 2.41452000  | -2.60518500 |
| H              | -6.80626000 | -3.54461500 | -7.50810100 | C | 2.74211400  | 3.57620100  | -0.30569500 |
| H              | -5.27672200 | -4.12825000 | -6.81923600 | C | 2.33353400  | 4.91149400  | -0.26708400 |
| C              | -4.63826300 | -6.75611800 | -0.76291600 | C | 3.59154000  | 3.04632800  | 0.66866700  |
| C              | -3.21293000 | -6.87157000 | -0.16399300 | C | 2.78763100  | 5.73124300  | 0.76715600  |
| C              | -5.61168500 | -7.20095000 | 0.35706600  | H | 1.66788400  | 5.28827400  | -1.03549300 |
| C              | -4.73682300 | -7.75743000 | -1.93728900 | C | 4.03036800  | 3.87575400  | 1.70125300  |
| H              | -2.42987200 | -6.83288800 | -0.92580500 | H | 3.87454200  | 2.00020900  | 0.65883800  |
| H              | -3.01499700 | -6.10078300 | 0.58741600  | C | 3.63501100  | 5.21476700  | 1.74939200  |
| H              | -3.12009600 | -7.84447600 | 0.33027400  | H | 2.47639100  | 6.77096400  | 0.80512500  |
| H              | -6.63661400 | -7.23668700 | -0.00802300 | H | 4.68044400  | 3.47077500  | 2.47095000  |
| H              | -5.33455600 | -8.20296300 | 0.70392500  | H | 3.98372200  | 5.85406000  | 2.55530500  |
| H              | -5.56029600 | -6.52054400 | 1.21357200  | C | -0.98558100 | 1.68533700  | 0.97393700  |
| H              | -4.42290200 | -8.75226900 | -1.59962000 | C | -1.46547200 | 0.34327000  | 1.62171800  |
| H              | -5.76104300 | -7.83228400 | -2.30355700 | C | 0.22394600  | 2.21155900  | 1.77734700  |
| H              | -4.08706200 | -7.45827500 | -2.76626600 | H | 1.07142100  | 1.52201100  | 1.74227000  |
| <b>INT-3aa</b> |             |             |             | H | 0.56225900  | 3.18212000  | 1.40571000  |
| C              | 0.55539600  | 0.53715900  | -0.73430200 | H | -0.06291200 | 2.34117900  | 2.82790400  |
| C              | 0.23809700  | -0.91339400 | -0.58948500 | C | -2.09311400 | 2.75115400  | 1.04400700  |
| Rh             | -1.99316400 | 0.33321400  | -1.79974700 | H | -2.34626900 | 2.97924900  | 2.08545000  |
| Cl             | -3.40254100 | -1.16758100 | -3.22021200 | H | -1.75464700 | 3.67890900  | 0.57038300  |
| C              | 1.34840200  | -1.87063700 | -0.97365000 | H | -3.00570700 | 2.43875700  | 0.53420800  |
| C              | 1.79845300  | 0.92388000  | -1.16430300 | C | -2.04175400 | -0.47646800 | 0.48736600  |
| H              | 1.22021900  | -2.84217700 | -0.51113200 | C | -3.10586700 | 0.01202700  | -0.18524100 |
| H              | 1.32960900  | -2.04069100 | -2.05523000 | C | -4.52842900 | 0.35209500  | 0.05177100  |
| H              | 3.98172800  | -2.10217700 | 3.14394200  | C | -5.02860300 | 0.20723000  | 1.50081600  |
| C              | 2.93650700  | -2.33281100 | 2.92572000  | H | -5.09727400 | -0.33270100 | -0.59793200 |
| O              | 2.71382600  | -2.34383500 | 1.50314800  | H | -4.75797300 | 1.35272300  | -0.33795400 |
| H              | 2.68246600  | -3.33479100 | 3.26938000  | C | -6.54985800 | 0.37959600  | 1.60509800  |
| H              | 2.29934500  | -1.58706600 | 3.40653100  | H | -4.74075200 | -0.77844100 | 1.88662700  |
| C              | 2.97783600  | -1.18766100 | 0.86146200  | H | -4.53479200 | 0.95026700  | 2.13941600  |
| C              | 2.75622100  | -1.34585700 | -0.64919800 | C | -7.06831200 | 0.25004500  | 3.04077700  |
| O              | 3.35072600  | -0.18335200 | 1.42877400  | H | -6.83268100 | 1.36005700  | 1.19923100  |
| C              | 3.78713700  | -2.35755900 | -1.18061200 | H | -7.04100200 | -0.36726400 | 0.96755800  |
| O              | 3.54758800  | -3.24433600 | -1.96829300 | H | -8.15508100 | 0.37340200  | 3.08311400  |
| O              | 5.01256300  | -2.09543600 | -0.68848500 | H | -6.82850400 | -0.73308100 | 3.46130200  |
| C              | 6.07108600  | -2.94873100 | -1.16575600 | H | -6.62213000 | 1.00787300  | 3.69485400  |
| H              | 6.16740500  | -2.86383200 | -2.25042200 | H | -0.62414200 | -0.19374700 | 2.07403700  |
| H              | 6.97528900  | -2.59678500 | -0.67063000 | H | -2.20272800 | 0.54275000  | 2.40638200  |
| H              | 5.86665500  | -3.98984400 | -0.90572600 | C | -2.96162000 | 1.77776500  | -2.51689200 |

|              |             |             |             |   |             |             |             |
|--------------|-------------|-------------|-------------|---|-------------|-------------|-------------|
| O            | -3.62960400 | 2.62847900  | -2.90390500 | C | 4.99039900  | -3.48220300 | 3.73087200  |
| C            | -0.38992100 | 1.59587500  | -4.61446600 | H | 5.70285800  | -2.96434300 | 3.08497200  |
| C            | 0.79364200  | 1.63620400  | -5.57157800 | H | 5.13550300  | -3.19466300 | 4.77146500  |
| C            | 0.93918200  | -0.69400500 | -5.52545900 | H | 5.11238000  | -4.56059000 | 3.60569400  |
| C            | -0.24262000 | -0.76245100 | -4.56606100 | C | -0.86747800 | -3.31233700 | -0.78805800 |
| O            | 0.85208800  | 0.45103300  | -6.36058200 | C | -1.37993300 | -0.73417100 | -0.26961800 |
| O            | -0.29602800 | 0.43380500  | -3.76498900 | H | -1.27556700 | 0.34352800  | -0.30478400 |
| H            | 1.88375400  | -0.67879500 | -4.95522900 | C | 1.88595700  | -1.28777900 | 1.84793400  |
| H            | 0.94435300  | -1.57058700 | -6.18131100 | H | 2.73871100  | -0.98806300 | 1.22295500  |
| H            | -1.18671300 | -0.87623800 | -5.11151900 | H | 2.08103400  | -0.89158100 | 2.84386800  |
| H            | -0.14469400 | -1.60139700 | -3.87354800 | S | 0.43992700  | 1.07414400  | 1.69225100  |
| H            | 0.69092800  | 2.47559900  | -6.26623700 | O | -0.02407800 | 1.85373600  | 0.52239400  |
| H            | 1.72562600  | 1.76541200  | -4.99998300 | O | 1.70764200  | 1.46183700  | 2.33862100  |
| H            | -0.37500900 | 2.46437600  | -3.95570300 | C | -0.86696200 | 1.20715800  | 2.93192800  |
| H            | -1.33357900 | 1.55196000  | -5.17725500 | C | -1.82203400 | 2.21181800  | 2.76094600  |
| C            | -1.48955600 | -2.86506300 | -0.30325200 | C | -0.85161300 | 0.39833800  | 4.07103700  |
| C            | -3.01891900 | -3.04237900 | -0.13553300 | C | -2.78592900 | 2.40552900  | 3.75219000  |
| C            | -1.13028300 | -3.61584700 | -1.60934600 | H | -1.79732000 | 2.82624100  | 1.86795400  |
| C            | -0.84993700 | -3.54592800 | 0.94002400  | C | -1.82815700 | 0.59742100  | 5.04776400  |
| H            | -3.37867700 | -2.66484300 | 0.82385000  | H | -0.11826000 | -0.39154600 | 4.18471600  |
| H            | -3.57150700 | -2.55837400 | -0.94340700 | C | -2.78990800 | 1.59921700  | 4.89204400  |
| H            | -3.24252100 | -4.11364800 | -0.17422800 | H | -3.53134300 | 3.18589600  | 3.63171700  |
| H            | -0.06295800 | -3.70799700 | -1.80372600 | H | -1.83355900 | -0.03168600 | 5.93275900  |
| H            | -1.52654300 | -4.63501100 | -1.54900200 | H | -3.54300700 | 1.75084500  | 5.65991600  |
| H            | -1.60873800 | -3.12522900 | -2.46115400 | C | -2.85013600 | -1.11945400 | 0.15172700  |
| H            | -1.15716800 | -4.59691300 | 0.97514200  | C | -3.18455500 | -2.12158200 | -0.97166700 |
| H            | 0.24128600  | -3.51910900 | 0.95348700  | C | -2.94784700 | -1.74350500 | 1.55364600  |
| H            | -1.20486600 | -3.06681400 | 1.85921200  | H | -2.33848200 | -2.64651000 | 1.64369000  |
| <b>TS3aa</b> |             |             |             | H | -2.62648500 | -1.04235300 | 2.32822300  |
| C            | -0.19114300 | -1.33337800 | 0.39330900  | H | -3.98864100 | -2.01829200 | 1.76048300  |
| C            | 0.04419800  | -2.74921300 | 0.05434000  | C | -3.75677600 | 0.11850700  | 0.07889000  |
| Rh           | -0.74435300 | -0.38203600 | -2.56376800 | H | -4.80355400 | -0.16562000 | 0.23661200  |
| Cl           | 0.10400700  | -0.07147300 | -4.84372400 | H | -3.48531400 | 0.84866200  | 0.84784000  |
| C            | 1.31729700  | -3.38894400 | 0.56052600  | H | -3.68553700 | 0.60788600  | -0.89745900 |
| C            | 0.63124400  | -0.68156100 | 1.25786200  | C | -1.77331700 | -2.34150400 | -1.53528600 |
| H            | 1.26756300  | -4.47139500 | 0.61209500  | C | -1.45326500 | -2.05790300 | -2.90756100 |
| H            | 2.10530600  | -3.16797400 | -0.17001100 | C | -1.74330800 | -2.73731500 | -4.20822000 |
| H            | 0.53953400  | -4.86178100 | 5.16951000  | C | -3.21798500 | -2.58832400 | -4.65732200 |
| C            | 0.13959800  | -5.20259500 | 4.21188600  | H | -1.49826700 | -3.80489800 | -4.13494900 |
| O            | 0.89982500  | -4.64393400 | 3.12457900  | H | -1.09873600 | -2.29630700 | -4.97170800 |
| H            | 0.23981900  | -6.28305500 | 4.11460900  | C | -3.46956800 | -3.24658500 | -6.01993400 |
| H            | -0.90881400 | -4.90482100 | 4.13712100  | H | -3.89393500 | -3.02414300 | -3.90891500 |
| C            | 0.94082300  | -3.29607800 | 3.07294200  | H | -3.45412200 | -1.51931100 | -4.71510100 |
| C            | 1.81953500  | -2.82806900 | 1.90449400  | C | -4.91496900 | -3.08315400 | -6.50083400 |
| O            | 0.36088100  | -2.58623500 | 3.86492700  | H | -2.78431600 | -2.81070000 | -6.75771800 |
| C            | 3.24559700  | -3.35672900 | 2.14852500  | H | -3.21964300 | -4.31490600 | -5.96089700 |
| O            | 3.93687800  | -3.90463200 | 1.32022700  | H | -5.06579000 | -3.55792500 | -7.47578000 |
| O            | 3.64321600  | -3.08810500 | 3.40584100  | H | -5.62313000 | -3.53632000 | -5.79731100 |

|                |             |             |             |   |             |             |             |
|----------------|-------------|-------------|-------------|---|-------------|-------------|-------------|
| H              | -5.17967300 | -2.02479700 | -6.60201700 | O | 3.02206000  | -3.23747800 | -2.40141100 |
| H              | -3.65487100 | -3.04882100 | -0.63149200 | O | 4.26975700  | -1.35508900 | -2.41386500 |
| H              | -3.82865500 | -1.67310500 | -1.73290700 | C | 5.08298500  | -1.92706400 | -3.45529100 |
| C              | 2.50778600  | -0.70864200 | -2.38752300 | H | 4.47716700  | -2.13893300 | -4.33940300 |
| C              | 3.95208900  | -0.31899200 | -2.02608400 | H | 5.84121700  | -1.17747400 | -3.67921000 |
| C              | 3.31780400  | 1.63123400  | -0.88890900 | H | 5.54600400  | -2.85482800 | -3.11126700 |
| C              | 2.12073100  | 1.57243400  | -1.86057200 | C | -0.24992300 | -2.28122100 | 1.69311700  |
| O              | 3.96983600  | 0.36087900  | -0.78213600 | C | -0.92205600 | 0.06570200  | 1.42830800  |
| O              | 1.57685800  | 0.24723000  | -1.84490000 | H | -1.75546800 | 0.62500300  | 1.00832100  |
| H              | 4.03257700  | 2.39838000  | -1.22997100 | C | 1.66560100  | -0.24859800 | -1.56082800 |
| H              | 2.99122500  | 1.88179700  | 0.12210300  | H | 1.17250800  | -0.62617700 | -2.46528700 |
| H              | 1.32681300  | 2.23925000  | -1.52559100 | H | 2.37807300  | 0.51773000  | -1.87398900 |
| H              | 2.40316200  | 1.84034200  | -2.88707900 | S | 0.02016600  | 1.95071900  | -1.14132100 |
| H              | 4.57296600  | -1.21338700 | -1.91947500 | O | -0.85358200 | 2.50246600  | -0.08716100 |
| H              | 4.40210700  | 0.30575100  | -2.81379900 | O | -0.48338000 | 1.78388800  | -2.51739100 |
| H              | 2.36807000  | -0.78409300 | -3.47282400 | C | 1.46381800  | 3.02774400  | -1.25177700 |
| H              | 2.23387000  | -1.66346600 | -1.93074600 | C | 2.07475500  | 3.21475400  | -2.49354100 |
| C              | -1.49507500 | 1.46341100  | -2.68193000 | C | 1.91671700  | 3.69435500  | -0.11166600 |
| O              | -2.18273500 | 2.33903800  | -2.97178400 | C | 3.17345100  | 4.07029400  | -2.58654600 |
| C              | -1.01057700 | -4.83490500 | -1.07692200 | H | 1.67363900  | 2.71256400  | -3.36712000 |
| C              | -2.34472100 | -5.19243100 | -1.77948300 | C | 3.01477700  | 4.54708100  | -0.21633500 |
| C              | 0.15850200  | -5.31056200 | -1.97722700 | H | 1.40116300  | 3.56364200  | 0.83272900  |
| C              | -1.03887300 | -5.65953800 | 0.23795700  | C | 3.64474200  | 4.73042500  | -1.44993000 |
| H              | -3.19918000 | -5.06700100 | -1.10867700 | H | 3.65466000  | 4.22662600  | -3.54737600 |
| H              | -2.53765600 | -4.61464200 | -2.68129600 | H | 3.37451100  | 5.07274500  | 0.66295700  |
| H              | -2.31671900 | -6.24815700 | -2.06723300 | H | 4.49914800  | 5.39663600  | -1.52661600 |
| H              | 1.13114900  | -5.15153800 | -1.50637100 | C | -0.41748700 | 0.69380000  | 2.79673700  |
| H              | 0.05785900  | -6.38235300 | -2.18288200 | C | -0.87450400 | -0.59219300 | 3.54670500  |
| H              | 0.16602000  | -4.78370900 | -2.93554800 | C | 1.08902500  | 0.94073600  | 2.90106500  |
| H              | -1.23177300 | -6.71033100 | -0.00496800 | H | 1.66939700  | 0.04426500  | 2.67033100  |
| H              | -0.11587100 | -5.62583800 | 0.81383100  | H | 1.42099500  | 1.73009300  | 2.22192100  |
| H              | -1.85017500 | -5.31554700 | 0.88778300  | H | 1.33780000  | 1.24765600  | 3.92406900  |
| <b>INT-4aa</b> |             |             |             | C | -1.18666700 | 1.96244500  | 3.17645400  |
| C              | 0.08700200  | -0.35178200 | 0.39440600  | H | -0.93499400 | 2.27043400  | 4.19819900  |
| C              | 0.46969500  | -1.74412800 | 0.66773400  | H | -0.94045000 | 2.77822300  | 2.49148100  |
| C              | 1.47067900  | -2.40962400 | -0.24212800 | H | -2.27026100 | 1.81450500  | 3.12972900  |
| C              | 0.63020500  | 0.34398900  | -0.63075300 | C | -1.29192100 | -1.28369100 | 2.19468600  |
| H              | 2.04195700  | -3.18963900 | 0.25756200  | C | -2.73271700 | -1.61146100 | 1.91814300  |
| H              | 0.93240800  | -2.89931600 | -1.06182900 | C | -3.77486100 | -0.89663200 | 2.72881000  |
| H              | 5.84281700  | -0.77354400 | 1.23522700  | C | -5.00790900 | -0.36788900 | 1.96748400  |
| C              | 5.10630400  | -1.43327500 | 1.69986900  | H | -3.34416700 | -0.07881300 | 3.31385900  |
| O              | 4.11977500  | -1.84209600 | 0.73554000  | H | -4.11786600 | -1.66074700 | 3.44889000  |
| H              | 5.57674000  | -2.35293500 | 2.04643200  | C | -5.99477800 | 0.34271400  | 2.90241900  |
| H              | 4.63305100  | -0.90641600 | 2.53178900  | H | -4.67711000 | 0.32467600  | 1.18266100  |
| C              | 3.43162300  | -0.83812600 | 0.14698000  | H | -5.50788300 | -1.20103500 | 1.46452700  |
| C              | 2.44582800  | -1.40214100 | -0.89013600 | C | -7.21501300 | 0.89968300  | 2.16266100  |
| O              | 3.59324000  | 0.33005100  | 0.41523700  | H | -6.32425600 | -0.36057400 | 3.67869400  |
| C              | 3.26084600  | -2.13217500 | -1.97140300 | H | -5.48101700 | 1.16067000  | 3.42668100  |

|              |             |             |             |   |             |             |             |
|--------------|-------------|-------------|-------------|---|-------------|-------------|-------------|
| H            | -7.90296400 | 1.40167900  | 2.85071700  | C | -4.42919600 | -0.95578400 | -1.23504200 |
| H            | -6.91793400 | 1.62713300  | 1.39872000  | C | -4.05179700 | -1.48242500 | 0.16111500  |
| H            | -7.77130200 | 0.10004400  | 1.66077900  | O | -4.69031900 | 0.19104400  | -1.51405000 |
| H            | -0.06484600 | -1.12097200 | 4.05373400  | C | -5.17606800 | -2.41841200 | 0.63786300  |
| H            | -1.67846000 | -0.44373500 | 4.26914800  | O | -5.01086600 | -3.49428900 | 1.16750400  |
| Rh           | -3.40000500 | -2.84724400 | 0.63551300  | O | -6.38520700 | -1.86252000 | 0.42868000  |
| C            | -2.33798500 | -2.25672500 | -0.78494300 | C | -7.51247800 | -2.63678900 | 0.87905900  |
| O            | -1.74429700 | -2.01375900 | -1.74561000 | H | -7.45475200 | -2.80266500 | 1.95733400  |
| Cl           | -4.74012800 | -4.03682600 | 2.26722700  | H | -8.39218800 | -2.04545700 | 0.62747100  |
| C            | -4.61802700 | -6.45170500 | -1.94669300 | H | -7.53830500 | -3.60388300 | 0.37157200  |
| C            | -3.88037400 | -5.62459700 | -0.90619300 | C | -0.29690600 | -1.72581200 | -0.58801500 |
| C            | -5.81752000 | -4.16907100 | -1.07094600 | C | -0.29104200 | 0.65688400  | -0.07284800 |
| C            | -6.49917800 | -5.50442200 | -0.82110100 | H | 0.10332300  | 1.33128900  | 0.68469600  |
| O            | -4.37656900 | -4.26794600 | -0.90120500 | C | -3.94713400 | -0.30221400 | 1.15241800  |
| O            | -6.02023700 | -6.52430300 | -1.69521300 | H | -3.93990800 | -0.69069900 | 2.17862200  |
| H            | -6.00595800 | -3.82227400 | -2.09389500 | H | -4.84027200 | 0.31831000  | 1.05052100  |
| H            | -6.17618900 | -3.42289600 | -0.35895900 | S | -2.75879000 | 2.15597400  | 1.64003700  |
| H            | -6.36746600 | -5.78896500 | 0.23110100  | O | -1.55128600 | 2.91275000  | 1.26729200  |
| H            | -7.57231500 | -5.40292700 | -1.01268100 | O | -3.10682800 | 1.94099200  | 3.05830200  |
| H            | -3.98597600 | -6.05324100 | 0.09681700  | C | -4.16668100 | 2.99999700  | 0.88945500  |
| H            | -2.81714400 | -5.55952200 | -1.15087900 | C | -5.38769600 | 3.01787700  | 1.56632200  |
| H            | -4.44135900 | -6.02126300 | -2.94431500 | C | -3.99998600 | 3.66578200  | -0.32656300 |
| H            | -4.22001600 | -7.47394000 | -1.94764000 | C | -6.46638600 | 3.69989100  | 1.00112700  |
| C            | -0.03339500 | -3.65005100 | 2.36466700  | H | -5.47131600 | 2.52448800  | 2.52852700  |
| C            | -1.05187100 | -3.91914800 | 3.49553800  | C | -5.08439300 | 4.34296400  | -0.88232200 |
| C            | -0.17249900 | -4.80323100 | 1.34034100  | H | -3.03158500 | 3.66909500  | -0.81363900 |
| C            | 1.38352200  | -3.68588200 | 2.99933400  | C | -6.31583300 | 4.35610500  | -0.22206100 |
| H            | -1.00002800 | -3.16792800 | 4.28893300  | H | -7.41996400 | 3.72504200  | 1.52015200  |
| H            | -2.07902500 | -3.96902800 | 3.12582200  | H | -4.96647500 | 4.86646000  | -1.82627200 |
| H            | -0.82531100 | -4.88694800 | 3.95539100  | H | -7.15695600 | 4.88744100  | -0.65802200 |
| H            | 0.56460300  | -4.74969100 | 0.53659600  | C | -0.14047100 | 1.28690400  | -1.52555100 |
| H            | -0.03848600 | -5.76325100 | 1.85122000  | C | 0.92815100  | 0.20000200  | -1.84966700 |
| H            | -1.17162500 | -4.79028000 | 0.89516400  | C | -1.37336200 | 1.20954100  | -2.42848300 |
| H            | 1.56076000  | -4.66907900 | 3.44935500  | H | -1.74904100 | 0.18682300  | -2.52374700 |
| H            | 2.17958600  | -3.50077200 | 2.27444500  | H | -2.19497300 | 1.82880700  | -2.05724900 |
| H            | 1.47691500  | -2.93736900 | 3.79337000  | H | -1.11265600 | 1.56156900  | -3.43402000 |
| <b>TS4aa</b> |             |             |             | C | 0.41334600  | 2.71323800  | -1.48225000 |
| C            | -1.59314900 | 0.01466800  | 0.31570900  | H | 0.68454200  | 3.04952000  | -2.49095200 |
| C            | -1.52421300 | -1.39901700 | -0.08992900 | H | -0.32687200 | 3.40546300  | -1.06973900 |
| C            | -2.72987900 | -2.28009600 | 0.13141400  | H | 1.30345100  | 2.77067800  | -0.84804700 |
| C            | -2.70222900 | 0.52226900  | 0.90276900  | C | 0.65487900  | -0.52593400 | -0.49217000 |
| H            | -2.81118400 | -3.07051700 | -0.61255200 | C | 1.86439200  | -0.72299300 | 0.45400300  |
| H            | -2.64761600 | -2.78358300 | 1.10146200  | C | 1.65523400  | -1.44185600 | 1.62264700  |
| H            | -5.84052800 | -1.15656700 | -3.46314700 | C | 2.66136300  | -1.71855700 | 2.69686200  |
| C            | -4.83983000 | -1.59490300 | -3.46811500 | H | 0.65551500  | -1.85089700 | 1.80393300  |
| O            | -4.44844100 | -1.96610600 | -2.13369700 | H | 1.84567800  | 0.08368400  | 1.39541200  |
| H            | -4.82623600 | -2.51874300 | -4.04571700 | C | 3.04225300  | -3.21716500 | 2.71459500  |
| H            | -4.13706000 | -0.86970900 | -3.88477100 | H | 3.55592100  | -1.11099300 | 2.52990000  |

|                |             |             |             |   |             |             |             |
|----------------|-------------|-------------|-------------|---|-------------|-------------|-------------|
| H              | 2.23320700  | -1.44937800 | 3.67174100  | H | 1.83711900  | -3.95813200 | 0.40119200  |
| C              | 4.02281500  | -3.54373400 | 3.84524400  | H | -0.05474300 | -4.77201100 | 5.81894000  |
| H              | 2.13777800  | -3.82986400 | 2.82381700  | C | -0.53862700 | -5.08150500 | 4.88973700  |
| H              | 3.48757600  | -3.48254000 | 1.74851000  | O | 0.30597600  | -4.78349000 | 3.76247100  |
| H              | 4.28672700  | -4.60582800 | 3.83962000  | H | -0.68210400 | -6.16130100 | 4.87049800  |
| H              | 4.94876000  | -2.96782900 | 3.74253100  | H | -1.49581600 | -4.56360200 | 4.79658200  |
| H              | 3.59120400  | -3.31011200 | 4.82462300  | C | 0.63197400  | -3.48337100 | 3.60736000  |
| H              | 0.73699400  | -0.39420100 | -2.74831600 | C | 1.58111000  | -3.29971300 | 2.41262000  |
| H              | 1.94824000  | 0.59207900  | -1.89450900 | O | 0.22893500  | -2.60786700 | 4.34101200  |
| Rh             | 3.68716600  | 0.21299400  | 0.09001100  | C | 2.91653300  | -3.98279500 | 2.76178900  |
| C              | 4.30678700  | -1.12667000 | -1.00309600 | O | 3.57095500  | -4.66047500 | 2.00223700  |
| O              | 4.75906600  | -1.96105400 | -1.67182200 | O | 3.29232000  | -3.68599800 | 4.02015400  |
| Cl             | 2.90363800  | 1.88795500  | 1.70942400  | C | 4.56135400  | -4.22622900 | 4.43566400  |
| C              | 6.70086700  | 3.34858600  | -1.13575500 | H | 5.36279900  | -3.84850000 | 3.79679000  |
| C              | 5.40447400  | 2.55786700  | -1.06867900 | H | 4.69876200  | -3.89124700 | 5.46306200  |
| C              | 6.37636200  | 1.68730900  | 0.98251600  | H | 4.54677200  | -5.31725800 | 4.38220100  |
| C              | 6.50347400  | 3.17974200  | 1.23820300  | C | -1.14229900 | -3.62565300 | -0.28898300 |
| O              | 5.55821200  | 1.42014000  | -0.19029200 | C | -1.50441700 | -1.26061200 | 0.16560000  |
| O              | 7.09163000  | 3.86588900  | 0.13434600  | H | -1.36033300 | -0.29328100 | -0.31258800 |
| H              | 7.36092200  | 1.23705700  | 0.80794300  | C | 1.86470200  | -1.79723600 | 2.18088000  |
| H              | 5.89308300  | 1.19509900  | 1.82802900  | H | 2.74684000  | -1.70122400 | 1.53521600  |
| H              | 5.51537700  | 3.59309300  | 1.48058700  | H | 2.13017600  | -1.32466900 | 3.12710400  |
| H              | 7.15883700  | 3.34460100  | 2.09960000  | S | 0.73904100  | 0.70112900  | 1.66044000  |
| H              | 4.57576100  | 3.18159900  | -0.71500500 | O | 0.26469900  | 1.28018200  | 0.38571100  |
| H              | 5.14471500  | 2.15059800  | -2.04879200 | O | 2.09544500  | 1.02111700  | 2.14146700  |
| H              | 7.49812800  | 2.70580900  | -1.54005800 | C | -0.43306600 | 1.23569100  | 2.92549900  |
| H              | 6.57482100  | 4.19581600  | -1.82053000 | C | -1.19291400 | 2.37692000  | 2.65902200  |
| C              | 0.09588900  | -3.07417100 | -1.22343800 | C | -0.49765000 | 0.58812800  | 4.16200700  |
| C              | 1.59384400  | -3.14017900 | -1.58632000 | C | -2.03531900 | 2.87844600  | 3.65266400  |
| C              | -0.18814800 | -4.26318600 | -0.27105900 | H | -1.12080100 | 2.85121500  | 1.68653400  |
| C              | -0.70373900 | -3.26389000 | -2.54096900 | C | -1.35353100 | 1.09459400  | 5.14152600  |
| H              | 1.89926800  | -2.32771400 | -2.24832100 | H | 0.07858000  | -0.31044700 | 4.35310000  |
| H              | 2.23211300  | -3.11276800 | -0.70111300 | C | -2.11622500 | 2.23808900  | 4.89097200  |
| H              | 1.79936800  | -4.08163100 | -2.10637800 | H | -2.62960000 | 3.76589600  | 3.45641700  |
| H              | -1.24518000 | -4.37989200 | -0.02892400 | H | -1.42137200 | 0.59311600  | 6.10230100  |
| H              | 0.14539100  | -5.19454800 | -0.74188300 | H | -2.77609400 | 2.62833900  | 5.66046200  |
| H              | 0.36279800  | -4.15573700 | 0.66914600  | C | -2.92185700 | -1.33029800 | 0.88795300  |
| H              | -0.46110800 | -4.23582000 | -2.98549800 | C | -3.40668100 | -2.31308100 | -0.21999000 |
| H              | -1.78477300 | -3.22340900 | -2.38932100 | C | -2.92739900 | -1.94086500 | 2.29167700  |
| H              | -0.44127400 | -2.48996300 | -3.26912800 | H | -2.43235100 | -2.91543800 | 2.31706400  |
| <b>INT-5aa</b> |             |             |             | H | -2.42885000 | -1.28986100 | 3.01598800  |
| C              | -0.25273700 | -1.75441800 | 0.82167300  | H | -3.96243900 | -2.08481400 | 2.62462200  |
| C              | -0.15139800 | -3.19403000 | 0.54926300  | C | -3.65692300 | 0.01224700  | 0.88545100  |
| Rh             | -2.30836300 | -2.79285900 | -4.18197600 | H | -4.70142300 | -0.12723500 | 1.18922500  |
| Cl             | -3.99398700 | -1.05153900 | -4.22593700 | H | -3.19578700 | 0.72080600  | 1.58027700  |
| C              | 1.01824900  | -3.95240100 | 1.12975600  | H | -3.65953700 | 0.46581100  | -0.11119000 |
| C              | 0.68076400  | -1.09565100 | 1.54837400  | C | -1.95668100 | -2.42865800 | -0.79545600 |
| H              | 0.78966900  | -4.99660100 | 1.33104100  | C | -1.76624900 | -1.87566200 | -2.20263400 |

|                       |             |             |             |   |             |             |             |
|-----------------------|-------------|-------------|-------------|---|-------------|-------------|-------------|
| C                     | -0.62766000 | -1.89828000 | -3.01405800 | C | 0.80147400  | -1.13084800 | 1.96541300  |
| C                     | -0.12675800 | -0.70481400 | -3.80114400 | H | 0.80452400  | -5.01785100 | 1.53749300  |
| H                     | 0.13848200  | -2.63782000 | -2.77747500 | H | 1.97871900  | -3.96663600 | 0.78644900  |
| H                     | -2.38934500 | -0.99371400 | -2.32794800 | H | -0.53361100 | -5.02578200 | 5.89599000  |
| C                     | 0.99175900  | 0.04488500  | -3.04418600 | C | -0.94608400 | -5.21710200 | 4.90253700  |
| H                     | 0.26746400  | -1.03888100 | -4.76935900 | O | 0.02425400  | -4.89933900 | 3.88816900  |
| H                     | -0.95933600 | -0.02555200 | -4.01287600 | H | -1.16741200 | -6.27627500 | 4.77477300  |
| C                     | 1.53839100  | 1.22932400  | -3.84770600 | H | -1.84842700 | -4.61572500 | 4.77059500  |
| H                     | 0.61878500  | 0.39944300  | -2.07681900 | C | 0.44761400  | -3.61761400 | 3.87107300  |
| H                     | 1.80884700  | -0.65549700 | -2.82326400 | C | 1.52731000  | -3.41385500 | 2.79599000  |
| H                     | 2.32623800  | 1.74791900  | -3.29279400 | O | 0.02896800  | -2.77316300 | 4.63188500  |
| H                     | 1.96003100  | 0.90301900  | -4.80571900 | C | 2.78965000  | -4.17058300 | 3.24893900  |
| H                     | 0.74914200  | 1.95824800  | -4.06289200 | O | 3.49927700  | -4.83451900 | 2.52755800  |
| H                     | -3.84741100 | -3.24116000 | 0.14841000  | O | 3.03411900  | -3.96166400 | 4.55701100  |
| H                     | -4.10052300 | -1.86067400 | -0.93416600 | C | 4.22703200  | -4.58081000 | 5.07367900  |
| C                     | -3.33539200 | -2.85392300 | -7.14575000 | H | 5.10807400  | -4.20783700 | 4.54657600  |
| C                     | -4.14140600 | -3.51413900 | -8.25209300 | H | 4.26494500  | -4.30726300 | 6.12748200  |
| C                     | -5.81404700 | -3.43782500 | -6.54989200 | H | 4.17484400  | -5.66584000 | 4.95674100  |
| C                     | -4.79172600 | -4.12084300 | -5.65636200 | C | -0.89963300 | -3.48701300 | -0.17882100 |
| O                     | -5.52769900 | -3.62732700 | -7.93209300 | C | -1.23419500 | -1.13746300 | 0.34941400  |
| O                     | -3.44217800 | -3.63321200 | -5.92806500 | H | -1.00095800 | -0.17152200 | -0.09468300 |
| H                     | -6.79910500 | -3.87970200 | -6.36906100 | C | 1.88634300  | -1.91422000 | 2.67933100  |
| H                     | -5.86691400 | -2.37199500 | -6.29267700 | H | 2.83436800  | -1.82172500 | 2.13480000  |
| H                     | -5.00900300 | -3.91542700 | -4.60681100 | H | 2.06780600  | -1.50437500 | 3.67341900  |
| H                     | -4.78069500 | -5.20285700 | -5.82993800 | S | 0.93331900  | 0.65227800  | 2.16365400  |
| H                     | -4.04715800 | -2.91981900 | -9.16963000 | O | 0.58814700  | 1.31403600  | 0.88979900  |
| H                     | -3.73026400 | -4.51438300 | -8.45516200 | O | 2.25887800  | 0.88493700  | 2.76701100  |
| H                     | -2.27245700 | -2.83783400 | -7.39820900 | C | -0.30714600 | 1.18225400  | 3.36566500  |
| H                     | -3.66852800 | -1.83130700 | -6.94458800 | C | -1.00873500 | 2.35844400  | 3.09259500  |
| C                     | -1.11838400 | -4.18812500 | -4.41160700 | C | -0.48190600 | 0.49310600  | 4.56864900  |
| O                     | -0.39367900 | -5.04851600 | -4.68221700 | C | -1.90279800 | 2.85337500  | 4.04370000  |
| C                     | -1.48162300 | -5.10487500 | -0.57383700 | H | -0.85000300 | 2.86504400  | 2.14697800  |
| C                     | -0.28782900 | -5.83052400 | -1.24392900 | C | -1.38753000 | 0.99352300  | 5.50552400  |
| C                     | -1.82381900 | -5.81933000 | 0.76321000  | H | 0.04684400  | -0.43339300 | 4.76372100  |
| C                     | -2.72220300 | -5.27974500 | -1.47891600 | C | -2.09225100 | 2.17217900  | 5.24776500  |
| H                     | -0.02277000 | -5.37470500 | -2.19946500 | H | -2.45156800 | 3.76850500  | 3.84148800  |
| H                     | 0.60587000  | -5.83446700 | -0.61790300 | H | -1.53989800 | 0.45967500  | 6.43882900  |
| H                     | -0.55614800 | -6.87445700 | -1.44037400 | H | -2.79136900 | 2.55757500  | 5.98441400  |
| H                     | -2.68901800 | -5.35019200 | 1.24277500  | C | -2.69751000 | -1.16160700 | 0.98010600  |
| H                     | -2.08213500 | -6.86534300 | 0.56223700  | C | -3.13826100 | -2.14143100 | -0.14978400 |
| H                     | -1.00193600 | -5.81168600 | 1.48110700  | C | -2.82473300 | -1.76385200 | 2.38122700  |
| H                     | -2.81786800 | -6.33522900 | -1.75567100 | H | -2.36381400 | -2.75382600 | 2.44017500  |
| H                     | -3.64483500 | -4.99500500 | -0.96752400 | H | -2.36075300 | -1.12919500 | 3.14132500  |
| H                     | -2.65937400 | -4.69385900 | -2.39825900 | H | -3.88560800 | -1.87572800 | 2.63677600  |
| <b>PI<sup>A</sup></b> |             |             |             | C | -3.39043800 | 0.20143400  | 0.91378300  |
| C                     | -0.07938800 | -1.71314600 | 1.11762300  | H | -4.45795800 | 0.10086900  | 1.14543900  |
| C                     | 0.00278400  | -3.14224500 | 0.78413800  | H | -2.95450100 | 0.90340000  | 1.63150900  |
| C                     | 1.08760800  | -3.97283600 | 1.42429300  | H | -3.30478800 | 0.64355900  | -0.08471700 |

|              |             |             |             |   |             |             |             |
|--------------|-------------|-------------|-------------|---|-------------|-------------|-------------|
| C            | -1.66409900 | -2.24860600 | -0.66024900 | C | 6.91079300  | -3.80284700 | -1.18287400 |
| C            | -1.45268400 | -1.93132200 | -2.12930000 | H | 6.97519300  | -3.71727300 | -2.26987600 |
| C            | -0.33852100 | -1.40012200 | -2.64292300 | H | 7.85957600  | -3.53733300 | -0.71832100 |
| C            | -0.13396800 | -1.04737200 | -4.09027900 | H | 6.62405000  | -4.82396600 | -0.92168100 |
| H            | 0.49540000  | -1.17177000 | -1.97622900 | C | -0.03343300 | -1.28804200 | -0.24209200 |
| H            | -2.29053200 | -2.14110800 | -2.79460000 | C | 0.65626600  | 1.04839100  | -0.19368500 |
| C            | 0.12753900  | 0.45487600  | -4.31402300 | H | 0.64037600  | 1.90009800  | -0.86384300 |
| H            | 0.72572200  | -1.61059500 | -4.48473000 | C | 4.15016000  | -0.56891900 | -1.11716800 |
| H            | -1.00657500 | -1.36206800 | -4.67768700 | H | 4.25865900  | -0.66422400 | -2.20491500 |
| C            | 0.39618000  | 0.80085500  | -5.78161900 | H | 5.12110500  | -0.26036700 | -0.72305100 |
| H            | -0.73518900 | 1.02463200  | -3.94704900 | S | 3.67532900  | 2.15419300  | -1.12619900 |
| H            | 0.98112800  | 0.76732200  | -3.69864400 | O | 2.62701300  | 3.11535600  | -0.74189900 |
| H            | 0.57796900  | 1.87267500  | -5.91089400 | O | 4.20365500  | 2.13112400  | -2.50201500 |
| H            | 1.27502900  | 0.26651200  | -6.16069800 | C | 5.07825500  | 2.40446000  | -0.02459600 |
| H            | -0.45456100 | 0.52894800  | -6.41720200 | C | 6.36838100  | 2.32962300  | -0.55309600 |
| H            | -3.59897500 | -3.07227600 | 0.19397800  | C | 4.85694100  | 2.70966500  | 1.32035900  |
| H            | -3.80294600 | -1.67902700 | -0.88725000 | C | 7.45799400  | 2.55531300  | 0.28939800  |
| C            | -1.14532000 | -4.89988900 | -0.73572100 | H | 6.50193400  | 2.11880600  | -1.60851600 |
| C            | 0.16194500  | -5.50157200 | -1.30911400 | C | 5.95334300  | 2.92938800  | 2.15225000  |
| C            | -1.69542700 | -5.80575600 | 0.39803700  | H | 3.84642900  | 2.78868200  | 1.70491800  |
| C            | -2.18537500 | -4.92333900 | -1.87882500 | C | 7.25049500  | 2.85009300  | 1.63820700  |
| H            | 0.57831700  | -4.84917700 | -2.08294100 | H | 8.46647100  | 2.50639400  | -0.10992000 |
| H            | 0.92950100  | -5.65702400 | -0.54941300 | H | 5.79532200  | 3.16821800  | 3.19938700  |
| H            | -0.04979000 | -6.47483000 | -1.76647100 | H | 8.10097400  | 3.02532500  | 2.29046600  |
| H            | -2.67506300 | -5.45162000 | 0.73596100  | C | 0.33401600  | 1.48627100  | 1.29157300  |
| H            | -1.82025200 | -6.83024000 | 0.02904800  | C | -1.15310100 | 0.98796700  | 1.34444600  |
| H            | -1.03865600 | -5.83998800 | 1.26991000  | C | 1.15876100  | 0.73684800  | 2.34863200  |
| H            | -2.39286600 | -5.96361600 | -2.15160400 | H | 1.06959100  | -0.34834400 | 2.24728200  |
| H            | -3.13439700 | -4.46452000 | -1.58866400 | H | 2.22069200  | 0.99118800  | 2.28897100  |
| H            | -1.81719000 | -4.41476400 | -2.77209400 | H | 0.79832400  | 1.00380500  | 3.34816000  |
| <b>TS4cc</b> |             |             |             | C | 0.44353800  | 2.99717000  | 1.53822500  |
| C            | 1.82594900  | 0.17160600  | -0.48848500 | H | 0.08184600  | 3.22776200  | 2.54690200  |
| C            | 1.33100800  | -1.21058300 | -0.47974200 | H | 1.47634600  | 3.33876600  | 1.44699300  |
| C            | 2.30988000  | -2.29288800 | -0.85578500 | H | -0.15273700 | 3.57642900  | 0.82982700  |
| C            | 3.10423400  | 0.47381700  | -0.80924500 | C | -0.55975800 | 0.11269100  | -0.31093400 |
| H            | 2.08182400  | -3.25107300 | -0.41177500 | C | -1.85110000 | 0.74902700  | -0.29339300 |
| H            | 2.25790500  | -2.44314700 | -1.94193500 | C | -1.92194700 | 2.15051200  | -0.96237900 |
| H            | 4.91713500  | -3.02774900 | 3.22675500  | C | -3.03563200 | 3.09156900  | -0.48101400 |
| C            | 3.86602200  | -3.19647100 | 2.98213400  | H | -2.07545100 | 1.94810300  | -2.03027100 |
| O            | 3.66110300  | -3.08952400 | 1.55976800  | H | -0.98312200 | 2.70482900  | -0.90302800 |
| H            | 3.56597500  | -4.20995900 | 3.24541900  | C | -3.02092200 | 4.43242100  | -1.22881900 |
| H            | 3.25457300  | -2.46284700 | 3.51221600  | H | -4.00644600 | 2.60089000  | -0.60800100 |
| C            | 3.99049000  | -1.90178300 | 1.01238300  | H | -2.93597000 | 3.27992700  | 0.59649000  |
| C            | 3.77065200  | -1.93157800 | -0.51229800 | C | -4.13007100 | 5.38283200  | -0.76671300 |
| O            | 4.40235100  | -0.95823600 | 1.64777600  | H | -2.04456400 | 4.92012300  | -1.09804900 |
| C            | 4.68944700  | -3.01134900 | -1.11027100 | H | -3.12365100 | 4.24777900  | -2.30702400 |
| O            | 4.34446700  | -3.85718900 | -1.90327400 | H | -4.09840500 | 6.33108300  | -1.31342500 |
| O            | 5.94980600  | -2.86352200 | -0.66159700 | H | -5.12018600 | 4.94019100  | -0.92390400 |



|                |             |             |             |   |             |             |             |
|----------------|-------------|-------------|-------------|---|-------------|-------------|-------------|
| H              | -4.03755900 | 5.61009000  | 0.30143100  | O | 3.14889000  | -1.77566600 | 0.53655200  |
| H              | -1.33016000 | 0.12817200  | 1.98243700  | C | 3.55887300  | -1.04310600 | -2.67187100 |
| H              | -1.89883100 | 1.74171700  | 1.60261600  | O | 3.38873400  | -1.08895500 | -3.87010600 |
| Rh             | -3.76601700 | -0.03491100 | -0.28503700 | O | 4.76820500  | -1.09654100 | -2.08395700 |
| C              | -3.66752300 | -0.23114500 | -2.10444000 | C | 5.88990800  | -1.20796200 | -2.97861500 |
| O              | -3.64945800 | -0.31662700 | -3.26521000 | H | 5.93738900  | -0.34024500 | -3.64089300 |
| Cl             | -4.21212000 | 0.38862300  | 2.10197000  | H | 6.77029800  | -1.25160400 | -2.33844000 |
| C              | -7.62780100 | -2.38709800 | 0.27577400  | H | 5.80685500  | -2.11312500 | -3.58481500 |
| C              | -6.15283600 | -2.02237300 | 0.33856100  | C | -1.34350200 | -1.26298600 | -1.47761900 |
| C              | -6.95423600 | 0.23393200  | -0.05274400 | C | -1.38097600 | 0.75184000  | -0.11481100 |
| C              | -7.82452200 | -0.16518000 | 1.12761800  | H | -1.63777200 | 1.37923200  | -0.99020100 |
| O              | -5.92330800 | -0.75654600 | -0.31362900 | C | 2.55569800  | 0.51104800  | -0.99533000 |
| O              | -8.45970500 | -1.42702700 | 0.92494500  | H | 2.77367300  | 1.25172600  | -1.77443800 |
| H              | -7.55727500 | 0.32861900  | -0.96426000 | H | 3.40626300  | 0.51304700  | -0.31104100 |
| H              | -6.44856700 | 1.17896400  | 0.15286600  | S | 1.74679400  | 2.36055700  | 0.76858700  |
| H              | -7.21644500 | -0.16803200 | 2.04128900  | O | 0.61086500  | 2.86450700  | 1.55476400  |
| H              | -8.62419600 | 0.57229500  | 1.25249100  | O | 2.48021800  | 3.29391000  | -0.10812000 |
| H              | -5.79361300 | -1.96698600 | 1.37216000  | C | 2.92731600  | 1.66822800  | 1.94350000  |
| H              | -5.55189000 | -2.75562200 | -0.20541700 | C | 4.16098100  | 2.30456600  | 2.08530700  |
| H              | -7.93253100 | -2.48832500 | -0.77741200 | C | 2.56525800  | 0.57501300  | 2.73346400  |
| H              | -7.78379100 | -3.35765200 | 0.76375400  | C | 5.05058100  | 1.83997200  | 3.05500700  |
| C              | -0.85577100 | -2.58538600 | -0.04656200 | H | 4.40629500  | 3.14355100  | 1.44307400  |
| C              | -1.83953500 | -2.41866400 | 1.13335700  | C | 3.46951300  | 0.11688400  | 3.69094000  |
| C              | -1.61420300 | -2.92098100 | -1.35208000 | H | 1.61428300  | 0.07076300  | 2.58917400  |
| C              | -0.01660900 | -3.83691100 | 0.31681700  | C | 4.70430300  | 0.74944500  | 3.85559300  |
| H              | -1.30041100 | -2.27736100 | 2.07731400  | H | 6.01312000  | 2.32692100  | 3.18087200  |
| H              | -2.53601100 | -1.59108300 | 0.99631800  | H | 3.21038100  | -0.74198600 | 4.30229600  |
| H              | -2.43680200 | -3.33093400 | 1.23200700  | H | 5.40177100  | 0.38631400  | 4.60515700  |
| H              | -0.91692000 | -3.05088200 | -2.18716600 | C | -2.16320300 | 1.47808700  | 1.03966100  |
| H              | -2.16226700 | -3.86148300 | -1.22373200 | C | -3.58887300 | 0.91973600  | 0.75320000  |
| H              | -2.33360100 | -2.14612800 | -1.60761100 | C | -1.74770900 | 1.16491400  | 2.48540200  |
| H              | -0.70958200 | -4.60889200 | 0.66404500  | H | -1.81223800 | 0.09684600  | 2.70703200  |
| H              | 0.51288700  | -4.26461700 | -0.53708100 | H | -0.73357000 | 1.50372500  | 2.68834300  |
| H              | 0.69394800  | -3.65123100 | 1.12830300  | H | -2.42626100 | 1.69110400  | 3.16786600  |
| <b>INT-5cc</b> |             |             |             | C | -2.23707500 | 3.00867500  | 0.84006700  |
| C              | 0.06612300  | 0.40637600  | -0.46797300 | H | -3.00274000 | 3.42245000  | 1.50713700  |
| C              | -0.08243300 | -0.70979100 | -1.45101800 | H | -1.29267500 | 3.49995700  | 1.05645200  |
| C              | 1.09013800  | -1.01173900 | -2.34379600 | H | -2.53413800 | 3.25462900  | -0.18716300 |
| C              | 1.29348400  | 0.95164000  | -0.26924300 | C | -2.15788900 | -0.52915700 | -0.47487400 |
| H              | 1.03857500  | -1.99180500 | -2.78921700 | C | -3.48780500 | -0.38765700 | -0.02511300 |
| H              | 1.10062900  | -0.29380500 | -3.17446600 | C | -4.78586000 | -0.75965600 | -0.74638100 |
| H              | 3.45861300  | -4.33253600 | 0.26378200  | C | -6.10035000 | -0.43889000 | -0.00810000 |
| C              | 2.41722500  | -4.25130000 | -0.05638200 | H | -4.79966900 | -1.79911700 | -1.07534300 |
| O              | 2.26423300  | -3.17366900 | -0.99994900 | H | -4.79044400 | -0.15814200 | -1.66804200 |
| H              | 2.10648300  | -5.15098600 | -0.58770400 | C | -7.32284600 | -1.00395700 | -0.74386800 |
| H              | 1.78098100  | -4.07006000 | 0.81241100  | H | -6.08360600 | -0.83359400 | 1.01256400  |
| C              | 2.65218000  | -1.96315400 | -0.54848300 | H | -6.21373200 | 0.64727300  | 0.08843600  |
| C              | 2.43952700  | -0.88072900 | -1.62555400 | C | -8.64855200 | -0.63462800 | -0.07132900 |

|                       |             |             |             |   |             |             |             |
|-----------------------|-------------|-------------|-------------|---|-------------|-------------|-------------|
| H                     | -7.32426100 | -0.64146500 | -1.78121700 | H | 0.55997600  | -5.20052300 | 0.34680500  |
| H                     | -7.23338200 | -2.09689000 | -0.80133500 | H | 0.23497400  | -3.74797300 | 1.35010300  |
| H                     | -9.50151200 | -1.05471200 | -0.61393700 | C | 1.84413200  | -2.27246500 | -0.16466800 |
| H                     | -8.68905700 | -1.01314800 | 0.95619900  | C | 2.19386900  | -1.54359300 | -1.47301400 |
| H                     | -8.78362200 | 0.45221900  | -0.02939100 | O | 2.02550100  | -1.85333400 | 0.95794400  |
| H                     | -4.18427700 | 0.82311000  | 1.66588800  | C | 3.32576100  | -2.32555100 | -2.16268800 |
| H                     | -4.13233500 | 1.62862600  | 0.10941100  | O | 3.37332600  | -2.58950700 | -3.34259600 |
| Rh                    | -2.57907500 | -1.97490700 | 1.46097200  | O | 4.29300700  | -2.64574300 | -1.28093900 |
| C                     | -4.30274500 | -2.61291700 | 1.43041700  | C | 5.43263100  | -3.33344400 | -1.83010700 |
| O                     | -5.29485600 | -3.21031400 | 1.49173300  | H | 5.92382700  | -2.71399400 | -2.58399300 |
| Cl                    | -0.15423100 | -1.94727500 | 1.71836100  | H | 6.09913500  | -3.51352400 | -0.98738800 |
| C                     | -1.91325800 | -5.48925400 | 4.24072100  | H | 5.12491100  | -4.27596100 | -2.28893500 |
| C                     | -1.92011200 | -4.67397800 | 2.95808400  | C | -1.43742400 | -0.54974900 | -2.20966100 |
| C                     | -2.00931700 | -2.78162000 | 4.49337600  | C | -1.01425000 | 1.26002900  | -0.63214000 |
| C                     | -0.81185800 | -3.53243700 | 5.05119700  | H | -0.98843100 | 2.23795300  | -1.13178600 |
| O                     | -2.44024900 | -3.34791800 | 3.22043700  | C | 2.70281600  | -0.11885900 | -1.17753100 |
| O                     | -1.08769500 | -4.91669700 | 5.25216800  | H | 3.18433700  | 0.28281700  | -2.07646400 |
| H                     | -2.86343900 | -2.83956700 | 5.17789100  | H | 3.48053800  | -0.16236500 | -0.41171500 |
| H                     | -1.75328600 | -1.73710400 | 4.31280300  | S | 2.17692700  | 2.40732600  | -0.20940500 |
| H                     | 0.04567600  | -3.39161300 | 4.38075800  | O | 1.13473800  | 3.42575000  | -0.43468400 |
| H                     | -0.55246000 | -3.11590500 | 6.02996400  | O | 3.48253800  | 2.57155600  | -0.87800500 |
| H                     | -0.91955600 | -4.58246600 | 2.52423100  | C | 2.50122800  | 2.35326500  | 1.56773500  |
| H                     | -2.59000400 | -5.12130300 | 2.21987200  | C | 2.63033400  | 3.58853800  | 2.21113500  |
| H                     | -2.94412800 | -5.58952600 | 4.61339200  | C | 2.68387700  | 1.15314100  | 2.25637600  |
| H                     | -1.53651700 | -6.49661700 | 4.02535400  | C | 2.95290300  | 3.61865700  | 3.56645300  |
| C                     | -1.89150100 | -2.35816800 | -2.42689700 | H | 2.46500300  | 4.50633300  | 1.65676300  |
| C                     | -2.64298300 | -3.45903600 | -1.64272900 | C | 3.00172100  | 1.19991900  | 3.61687600  |
| C                     | -2.82898200 | -1.67689300 | -3.45835100 | H | 2.56446000  | 0.19518600  | 1.76094100  |
| C                     | -0.84504600 | -3.13516400 | -3.26270700 | C | 3.14020900  | 2.42519000  | 4.26968300  |
| H                     | -1.94815100 | -4.00714300 | -0.99935100 | H | 3.05279000  | 4.57338500  | 4.07433000  |
| H                     | -3.43569700 | -3.07691200 | -1.00691900 | H | 3.13864000  | 0.27136900  | 4.16314300  |
| H                     | -3.08961200 | -4.16841200 | -2.34835100 | H | 3.38859800  | 2.45230600  | 5.32676200  |
| H                     | -2.27117000 | -0.94877500 | -4.05658800 | C | -1.56035500 | 1.47990000  | 0.82368600  |
| H                     | -3.23898800 | -2.42812800 | -4.14283100 | C | -3.08459200 | 1.50928400  | 0.51004000  |
| H                     | -3.66745500 | -1.15710300 | -2.99754400 | C | -1.23765000 | 0.27350200  | 1.72384400  |
| H                     | -1.37186700 | -3.93120900 | -3.79964000 | H | -1.59163500 | -0.66393400 | 1.28216700  |
| H                     | -0.35900200 | -2.51849800 | -4.02123600 | H | -0.16131900 | 0.18188200  | 1.89329300  |
| H                     | -0.08447500 | -3.61178500 | -2.63882800 | H | -1.72168100 | 0.38890900  | 2.70032800  |
| <b>P2<sup>A</sup></b> |             |             |             | C | -1.14449600 | 2.77826900  | 1.52414800  |
| C                     | 0.26885100  | 0.52443800  | -0.98202700 | H | -1.77858900 | 2.92991300  | 2.40670000  |
| C                     | -0.09715300 | -0.57337800 | -1.89524000 | H | -0.10960700 | 2.75435600  | 1.86495400  |
| C                     | 0.98341700  | -1.48137500 | -2.42689700 | H | -1.25614400 | 3.64523500  | 0.86749200  |
| C                     | 1.57725000  | 0.79924000  | -0.73926500 | C | -2.09086000 | 0.38196000  | -1.27349300 |
| H                     | 0.61294200  | -2.49319200 | -2.58231000 | C | -3.27696800 | 0.52872300  | -0.63475000 |
| H                     | 1.35984700  | -1.13458900 | -3.39474400 | C | -4.62626100 | -0.12182200 | -0.78956000 |
| H                     | 1.86325200  | -4.46385400 | 1.33724000  | C | -4.93716000 | -1.17240400 | 0.30085200  |
| C                     | 0.97217500  | -4.26984600 | 0.73559400  | H | -4.74827400 | -0.59085200 | -1.76741700 |
| O                     | 1.30928200  | -3.48294800 | -0.42105900 | H | -5.39485000 | 0.66376200  | -0.73393200 |

|             |             |             |             |    |             |             |             |
|-------------|-------------|-------------|-------------|----|-------------|-------------|-------------|
| C           | -6.34188900 | -1.77388600 | 0.16598500  | H  | -5.90617900 | 1.65801500  | 2.49239400  |
| H           | -4.18739300 | -1.97345900 | 0.25312400  | C  | -5.28361600 | 3.89792100  | 4.03951000  |
| H           | -4.83166800 | -0.71876800 | 1.29434400  | H  | -4.87853200 | 1.90586800  | 4.77869100  |
| C           | -6.65558500 | -2.81711400 | 1.24325200  | H  | -3.48398600 | 2.69845600  | 4.06609800  |
| H           | -7.08580000 | -0.96680900 | 0.20904600  | H  | -5.07624200 | 4.39448800  | 4.99292700  |
| H           | -6.44802900 | -2.23034000 | -0.82771500 | H  | -4.96625100 | 4.57304100  | 3.23669800  |
| H           | -7.66366000 | -3.22679200 | 1.12186300  | H  | -6.36954900 | 3.77582600  | 3.95738800  |
| H           | -5.94948500 | -3.65440200 | 1.20216000  | C  | -2.77328400 | -4.40586400 | -3.53822800 |
| H           | -6.59223900 | -2.38173800 | 2.24702600  | C  | -3.42381900 | -4.65369400 | -2.46380700 |
| H           | -3.68560400 | 1.25557200  | 1.39236000  | C  | -2.50828400 | -6.16374200 | -6.07517500 |
| H           | -3.39341800 | 2.52322800  | 0.20843200  | O  | -3.43417300 | -6.30400300 | -6.84263500 |
| C           | -2.15734500 | -1.30645600 | -3.33738300 | O  | -1.97536800 | -7.15440100 | -5.34687400 |
| C           | -2.87429900 | -2.55579700 | -2.76969400 | C  | -0.39077800 | -4.88399800 | -6.50517100 |
| C           | -3.16198800 | -0.34211600 | -4.01924500 | O  | 0.59355600  | -4.28915900 | -6.11442900 |
| C           | -1.22057200 | -1.78016200 | -4.47474900 | O  | -0.42263800 | -5.61520600 | -7.62835700 |
| H           | -2.14613600 | -3.25253400 | -2.34091000 | C  | -2.65060200 | -8.42780500 | -5.44666700 |
| H           | -3.59464500 | -2.30854300 | -1.98908200 | H  | -2.66822200 | -8.76621800 | -6.48488600 |
| H           | -3.40929700 | -3.07951200 | -3.57025500 | H  | -2.07026400 | -9.11090800 | -4.82698400 |
| H           | -2.62253600 | 0.45460300  | -4.54239000 | H  | -3.66998600 | -8.32573500 | -5.06887600 |
| H           | -3.75455400 | -0.88704100 | -4.76209600 | C  | 0.80048700  | -5.65413900 | -8.38993800 |
| H           | -3.84531600 | 0.13699700  | -3.32052300 | H  | 0.58559000  | -6.28527500 | -9.25109600 |
| H           | -1.83486300 | -2.11062500 | -5.31902700 | H  | 1.08033400  | -4.64767200 | -8.70904100 |
| H           | -0.57835300 | -0.97027700 | -4.83305600 | H  | 1.60845100  | -6.07856300 | -7.78999900 |
| H           | -0.58998600 | -2.62444100 | -4.19441200 | S  | -2.62159600 | -0.84514400 | -6.32477100 |
| <b>TS1b</b> |             |             |             | O  | -2.30066800 | -1.07328900 | -7.74572300 |
| C           | -1.76619600 | -4.83117400 | -5.82126500 | O  | -3.74826300 | 0.03241300  | -5.95534400 |
| C           | -2.56973100 | -3.66564200 | -6.49936400 | C  | -1.14393600 | -0.18185300 | -5.52904000 |
| H           | -2.03278800 | -3.28559700 | -7.36938800 | C  | 0.03505300  | -0.93215400 | -5.49489000 |
| H           | -3.49063800 | -4.10127500 | -6.89274900 | C  | -1.19288600 | 1.12251500  | -5.03449600 |
| C           | -1.52554500 | -4.59905100 | -4.31115600 | C  | 1.17603500  | -0.36595400 | -4.92616600 |
| H           | -0.99022300 | -5.45937100 | -3.89974200 | H  | 0.07829600  | -1.93975100 | -5.89506700 |
| H           | -0.87628400 | -3.72455700 | -4.20937200 | C  | -0.03986800 | 1.68050400  | -4.47940900 |
| C           | -2.91934800 | -2.49987600 | -5.60491500 | H  | -2.11990200 | 1.68175300  | -5.09346200 |
| C           | -3.54695800 | -2.55746600 | -4.43031700 | C  | 1.13986000  | 0.93659400  | -4.42075700 |
| C           | -4.32812700 | -1.86798200 | -3.49032400 | H  | 2.09384300  | -0.94434700 | -4.88508500 |
| H           | -5.14123600 | -1.32602600 | -3.97182400 | H  | -0.06623100 | 2.69495200  | -4.09316100 |
| C           | -3.86678800 | -1.15286300 | -2.19897700 | H  | 2.03350700  | 1.37206600  | -3.98337900 |
| C           | -4.81671300 | -1.53573000 | -1.01938800 | C  | -4.02109700 | 0.36355400  | -2.46993700 |
| H           | -5.85255500 | -1.34465600 | -1.33016500 | H  | -5.06037000 | 0.61974300  | -2.70443100 |
| H           | -4.74551500 | -2.61452400 | -0.84793800 | H  | -3.72632200 | 0.93037400  | -1.58219300 |
| C           | -4.55337700 | -0.82605900 | 0.23378000  | H  | -3.40387800 | 0.67608100  | -3.31327600 |
| C           | -4.33804200 | -0.24944700 | 1.27679900  | C  | -2.40375700 | -1.44257800 | -1.82489700 |
| C           | -4.10203900 | 0.46231500  | 2.53436700  | H  | -2.23998200 | -2.49674500 | -1.59648000 |
| C           | -4.82887300 | 1.82120000  | 2.62054400  | H  | -1.72988000 | -1.16272300 | -2.64025700 |
| H           | -3.02251400 | 0.61955900  | 2.66801000  | H  | -2.13074900 | -0.85731200 | -0.94232100 |
| H           | -4.41819000 | -0.17103600 | 3.37506300  | Rh | -4.93986000 | -3.98969500 | -3.66371000 |
| C           | -4.56549000 | 2.54801600  | 3.94404900  | Cl | -5.52880300 | -6.40056900 | -3.88315600 |
| H           | -4.51071500 | 2.45044500  | 1.77983200  | C  | -6.61613100 | -3.86945900 | -2.61224100 |

|               |             |             |             |    |             |             |             |
|---------------|-------------|-------------|-------------|----|-------------|-------------|-------------|
| O             | -7.53788000 | -3.82480400 | -1.93391800 | H  | -0.45006200 | 7.44174800  | 7.06125200  |
| C             | -3.42917200 | -5.28983500 | -1.13062200 | H  | -2.21656400 | 7.42536900  | 7.12199800  |
| H             | -4.14899200 | -6.11380700 | -1.12516300 | C  | 1.19415400  | -1.67400900 | 0.57488900  |
| H             | -2.43418800 | -5.68143000 | -0.88904500 | C  | 0.30553700  | -2.45570100 | 1.24034200  |
| H             | -3.71656300 | -4.58169800 | -0.34542800 | C  | 1.38407600  | -2.87582400 | -2.08320000 |
| C             | -6.62658400 | -3.98278400 | -8.03109200 | O  | 0.41913500  | -2.47438900 | -2.69568800 |
| C             | -6.50640800 | -4.56094900 | -6.62790600 | O  | 1.62364200  | -4.16549300 | -1.80354100 |
| C             | -7.21941700 | -2.48015500 | -5.74833200 | C  | 3.84641000  | -2.40821100 | -2.08343600 |
| C             | -7.32059200 | -1.92482400 | -7.16352100 | O  | 4.84756200  | -2.62011000 | -1.43704200 |
| O             | -6.20206500 | -3.49416400 | -5.69694600 | O  | 3.78571100  | -2.48173400 | -3.42719400 |
| O             | -7.61891000 | -2.96188900 | -8.08665600 | C  | 0.61942100  | -5.10271900 | -2.26138300 |
| H             | -6.93379600 | -1.69810400 | -5.04117700 | H  | 0.50107500  | -5.02342500 | -3.34427500 |
| H             | -8.18097200 | -2.91500100 | -5.43800700 | H  | 0.99985200  | -6.08601900 | -1.98668900 |
| H             | -8.13203000 | -1.19310500 | -7.22901800 | H  | -0.33330600 | -4.89894800 | -1.76730900 |
| H             | -6.37360100 | -1.42639500 | -7.42519800 | C  | 5.00863700  | -2.86123900 | -4.08561000 |
| H             | -7.44603800 | -5.03930700 | -6.32304500 | H  | 4.77530100  | -2.87599700 | -5.14963500 |
| H             | -5.69867400 | -5.28875600 | -6.55232400 | H  | 5.79781500  | -2.13607200 | -3.87324600 |
| H             | -5.65272700 | -3.58177000 | -8.35497600 | H  | 5.33240300  | -3.84827100 | -3.74748300 |
| H             | -6.93239800 | -4.76301500 | -8.73449800 | S  | 0.62076000  | 1.72180500  | -1.76671900 |
| <b>INT-2b</b> |             |             |             | O  | 0.12053600  | 1.38093700  | -3.11304800 |
| C             | 2.49424100  | -1.97825200 | -1.50045900 | O  | -0.24669500 | 2.47830900  | -0.84176200 |
| C             | 2.22819000  | -0.50575400 | -1.89079700 | C  | 2.12054200  | 2.69864200  | -2.00968300 |
| H             | 3.17495900  | 0.04745800  | -1.83907500 | C  | 2.68462000  | 2.76199100  | -3.28521100 |
| H             | 1.89270600  | -0.47820700 | -2.93031300 | C  | 2.67019100  | 3.40071200  | -0.93373200 |
| C             | 2.52895100  | -2.12260200 | 0.04242100  | C  | 3.82907200  | 3.53689700  | -3.48164200 |
| H             | 2.75765000  | -3.15272100 | 0.31345900  | H  | 2.21612100  | 2.22553900  | -4.10307100 |
| H             | 3.33889500  | -1.48925900 | 0.42214800  | C  | 3.81568100  | 4.16800500  | -1.14200600 |
| C             | 1.19566600  | 0.18633900  | -1.01553200 | H  | 2.20123700  | 3.35735700  | 0.04261100  |
| C             | 0.69411100  | -0.34389100 | 0.13792100  | C  | 4.39483600  | 4.23425600  | -2.41244300 |
| C             | -0.44789000 | 0.15091300  | 0.98547200  | H  | 4.27369600  | 3.59934900  | -4.47031500 |
| H             | -1.05189000 | 0.86722900  | 0.43353900  | H  | 4.25119700  | 4.72057200  | -0.31498200 |
| C             | -0.14702900 | 0.76130800  | 2.38655500  | H  | 5.28487000  | 4.83650600  | -2.56954500 |
| C             | -1.49532900 | 1.36123200  | 2.90749100  | C  | 0.85173700  | 1.93150900  | 2.20579700  |
| H             | -1.86768800 | 2.06956600  | 2.15481100  | H  | 0.47892900  | 2.65412500  | 1.47624400  |
| H             | -2.24447900 | 0.56341700  | 2.97553800  | H  | 0.99769600  | 2.44242200  | 3.16210900  |
| C             | -1.41627400 | 2.04062800  | 4.20145500  | H  | 1.82364100  | 1.56136700  | 1.86349100  |
| C             | -1.36462200 | 2.59816100  | 5.27524200  | C  | 0.43615000  | -0.19739300 | 3.43816900  |
| C             | -1.31675000 | 3.30115200  | 6.55889900  | H  | -0.22986300 | -1.03858500 | 3.64741000  |
| C             | -1.33472700 | 4.83774000  | 6.41795800  | H  | 1.40176300  | -0.60080300 | 3.12411000  |
| H             | -0.41497600 | 2.99757600  | 7.10894200  | H  | 0.58381500  | 0.34527000  | 4.37627100  |
| H             | -2.16651000 | 2.98369300  | 7.17934800  | Rh | -1.43898500 | -1.70529800 | 0.67913400  |
| C             | -1.29301900 | 5.55795600  | 7.77042600  | Cl | -2.35027000 | -3.88354200 | -0.11369800 |
| H             | -0.48105500 | 5.14917100  | 5.80293500  | C  | -2.31201200 | -1.88147000 | 2.26327000  |
| H             | -2.23545700 | 5.13381100  | 5.86591500  | O  | -2.87839300 | -2.07511800 | 3.24755000  |
| C             | -1.31135400 | 7.08390200  | 7.63673400  | C  | 0.49714700  | -3.74098600 | 1.96315300  |
| H             | -2.14692000 | 5.23326100  | 8.38074600  | H  | -0.18086200 | -4.50489500 | 1.57179300  |
| H             | -0.39288600 | 5.24851400  | 8.31927000  | H  | 1.53286300  | -4.09160400 | 1.89454200  |
| H             | -1.28219100 | 7.57125500  | 8.61667100  | H  | 0.26397700  | -3.60862900 | 3.02719500  |

|              |             |             |             |   |             |             |             |
|--------------|-------------|-------------|-------------|---|-------------|-------------|-------------|
| C            | -3.15097100 | -0.21179400 | -3.27586900 | C | 2.45332800  | 4.82506200  | -0.39208600 |
| C            | -2.98981800 | -1.27508800 | -2.20000600 | C | 3.88341100  | 3.07605800  | 0.52024900  |
| C            | -3.82121900 | 0.28981900  | -0.59787900 | C | 2.86324600  | 5.68577500  | 0.62776800  |
| C            | -3.96794700 | 1.31872300  | -1.71252500 | H | 1.74786300  | 5.14198900  | -1.15191700 |
| O            | -2.75633200 | -0.62762600 | -0.91902800 | C | 4.27723500  | 3.94380100  | 1.53885000  |
| O            | -4.22124400 | 0.67697800  | -2.95299900 | H | 4.25363200  | 2.05803000  | 0.49744100  |
| H            | -3.55273400 | 0.76544500  | 0.34852800  | C | 3.77267800  | 5.24594200  | 1.59168600  |
| H            | -4.75241000 | -0.27945300 | -0.47038700 | H | 2.47214800  | 6.69817500  | 0.66716600  |
| H            | -4.82078700 | 1.97404500  | -1.50730800 | H | 4.97937700  | 3.59988400  | 2.29236300  |
| H            | -3.05403000 | 1.92967200  | -1.76794100 | H | 4.08735400  | 5.91700900  | 2.38574900  |
| H            | -3.88711400 | -1.89869300 | -2.11541400 | C | -0.75977500 | 1.73760200  | 0.90368800  |
| H            | -2.12475900 | -1.91195300 | -2.38730300 | C | -1.26639700 | 0.40575900  | 1.53086300  |
| H            | -2.21146400 | 0.34541700  | -3.39718600 | C | 0.47518600  | 2.21808100  | 1.69467300  |
| H            | -3.40944700 | -0.68577100 | -4.22776700 | H | 1.30747100  | 1.51330700  | 1.63019900  |
| <b>TS2bb</b> |             |             |             | H | 0.82528000  | 3.18623200  | 1.32859600  |
| C            | 0.71476800  | 0.54655800  | -0.84585000 | H | 0.21359500  | 2.34091800  | 2.75239300  |
| C            | 0.34131700  | -0.86632800 | -0.70387900 | C | -1.84573300 | 2.82204500  | 1.01741000  |
| Rh           | -2.01222300 | 0.43523800  | -1.65650900 | H | -2.03745900 | 3.06586400  | 2.06841800  |
| Cl           | -3.63490300 | -0.98782100 | -2.97397700 | H | -1.52017700 | 3.73925800  | 0.51570000  |
| C            | 1.38852600  | -1.95567800 | -0.72013800 | H | -2.78950200 | 2.50985000  | 0.56393500  |
| C            | 1.98967500  | 0.85825000  | -1.22631800 | C | -1.51334100 | -2.58199200 | -0.80862800 |
| H            | 1.15445200  | -2.72285900 | 0.02356800  | H | -1.09037400 | -3.12494300 | -1.66249900 |
| H            | 1.38120600  | -2.47266700 | -1.68746800 | H | -1.23454500 | -3.13435300 | 0.09922200  |
| H            | 4.11091200  | -1.76140300 | 3.32222100  | H | -2.59743400 | -2.60202800 | -0.91737400 |
| C            | 3.04168400  | -1.92575000 | 3.16949000  | C | -2.15322000 | -0.19271800 | 0.49645100  |
| O            | 2.75878600  | -2.11372800 | 1.77119900  | C | -3.29225600 | 0.08400800  | -0.03163100 |
| H            | 2.71925000  | -2.84384100 | 3.65969100  | C | -4.76121500 | 0.18807900  | 0.05027200  |
| H            | 2.49133200  | -1.06652700 | 3.55996900  | C | -5.31845700 | -0.09838600 | 1.45691600  |
| C            | 3.09655400  | -1.08648100 | 0.96543800  | H | -5.18793100 | -0.49988800 | -0.69050100 |
| C            | 2.82066400  | -1.43250200 | -0.50575500 | H | -5.06284800 | 1.19124100  | -0.28235700 |
| O            | 3.56965700  | -0.04960100 | 1.37869700  | C | -6.84814200 | 0.00793700  | 1.50415600  |
| C            | 3.81832300  | -2.52718700 | -0.93081600 | H | -5.00715400 | -1.10336600 | 1.76897800  |
| O            | 3.56350200  | -3.44835400 | -1.67320600 | H | -4.87810100 | 0.60413600  | 2.17673800  |
| O            | 5.03869800  | -2.29716900 | -0.41068400 | C | -7.42404700 | -0.27006700 | 2.89594800  |
| C            | 6.06635900  | -3.23018200 | -0.79622300 | H | -7.15144100 | 1.01084000  | 1.17475900  |
| H            | 6.20140000  | -3.22020700 | -1.88002300 | H | -7.27980800 | -0.69422900 | 0.77897100  |
| H            | 6.97127700  | -2.89208800 | -0.29271800 | H | -8.51558700 | -0.18878100 | 2.89719400  |
| H            | 5.80102900  | -4.24128600 | -0.47890100 | H | -7.16516300 | -1.27838700 | 3.23826000  |
| C            | -0.99581300 | -1.17057100 | -0.77271300 | H | -7.03679100 | 0.44027800  | 3.63531700  |
| C            | -0.43091900 | 1.49679200  | -0.61388700 | H | -0.43080700 | -0.25635100 | 1.77377600  |
| H            | -0.25911400 | 2.45450600  | -1.09985700 | H | -1.83754500 | 0.60154700  | 2.44596300  |
| C            | 3.06356000  | -0.19936900 | -1.40760900 | C | -3.04088700 | 2.01508300  | -2.31235200 |
| H            | 3.09095200  | -0.53986900 | -2.45100200 | O | -3.72366500 | 2.88510200  | -2.61002700 |
| H            | 4.05002500  | 0.21584200  | -1.20164200 | C | -0.70053200 | 1.64624500  | -4.42905000 |
| S            | 2.50182900  | 2.47804700  | -1.82764900 | C | 0.44365000  | 1.64929300  | -5.43399000 |
| O            | 1.36245000  | 3.16050400  | -2.48329700 | C | 0.59773500  | -0.67073300 | -5.32234600 |
| O            | 3.72487800  | 2.22951300  | -2.61403300 | C | -0.55156600 | -0.72651900 | -4.32560700 |
| C            | 2.96733700  | 3.52741300  | -0.43271500 | O | 0.46460500  | 0.44404700  | -6.19070400 |

|                |             |             |             |   |             |             |             |
|----------------|-------------|-------------|-------------|---|-------------|-------------|-------------|
| O              | -0.59332900 | 0.49863300  | -3.55492100 | H | 3.91155800  | 2.00138600  | 0.68307800  |
| H              | 1.56039500  | -0.62386000 | -4.78607800 | C | 3.72258200  | 5.21216900  | 1.79757500  |
| H              | 0.59062900  | -1.56978800 | -5.94680500 | H | 2.59196100  | 6.79396600  | 0.86182600  |
| H              | -1.51312900 | -0.86259600 | -4.83074900 | H | 4.73854000  | 3.44655500  | 2.50857200  |
| H              | -0.41738200 | -1.53666500 | -3.60735400 | H | 4.08094800  | 5.84037000  | 2.60799400  |
| H              | 0.31096200  | 2.47145600  | -6.14390400 | C | -1.03451700 | 1.79296400  | 0.95257800  |
| H              | 1.39672900  | 1.79298000  | -4.90538900 | C | -1.49178200 | 0.46394100  | 1.64501800  |
| H              | -0.63907700 | 2.52669300  | -3.78978100 | C | 0.15479500  | 2.37220300  | 1.75029900  |
| H              | -1.66926200 | 1.60584200  | -4.94527500 | H | 1.01619900  | 1.69896500  | 1.74401300  |
| <b>INT-3bb</b> |             |             |             | H | 0.47640200  | 3.33595200  | 1.34711700  |
| C              | 0.55877200  | 0.62508300  | -0.70168100 | H | -0.14275400 | 2.53125800  | 2.79369700  |
| C              | 0.23820900  | -0.80650700 | -0.52809400 | C | -2.17114400 | 2.82917700  | 0.97677900  |
| Rh             | -2.02949200 | 0.31418200  | -1.74308600 | H | -2.43843000 | 3.08806700  | 2.00742000  |
| Cl             | -3.39276800 | -1.41157200 | -2.90375800 | H | -1.85754200 | 3.74809700  | 0.47008100  |
| C              | 1.28830800  | -1.83905600 | -0.86155200 | H | -3.07003600 | 2.46879500  | 0.47356700  |
| C              | 1.80923500  | 0.97977400  | -1.13564400 | C | -1.45356900 | -2.67993000 | -0.39053200 |
| H              | 1.12425100  | -2.75244300 | -0.28814500 | H | -0.99266300 | -3.16415000 | -1.25374800 |
| H              | 1.21648600  | -2.12562400 | -1.91745800 | H | -1.15534800 | -3.23065000 | 0.51273400  |
| H              | 4.11423100  | -2.07169200 | 3.11298700  | H | -2.53471400 | -2.76796300 | -0.49770300 |
| C              | 3.05343200  | -2.27481400 | 2.94883100  | C | -2.06780200 | -0.39993200 | 0.54587100  |
| O              | 2.76106000  | -2.30074800 | 1.53980200  | C | -3.15843000 | 0.01602600  | -0.13407300 |
| H              | 2.78862800  | -3.26386500 | 3.32116300  | C | -4.59538800 | 0.29166500  | 0.08873700  |
| H              | 2.46236300  | -1.50356300 | 3.44824200  | C | -5.09334600 | 0.08610700  | 1.53069400  |
| C              | 3.02136200  | -1.16168800 | 0.86863200  | H | -5.12841400 | -0.39578700 | -0.58682700 |
| C              | 2.72201200  | -1.33467000 | -0.62818900 | H | -4.85593400 | 1.29537300  | -0.27407100 |
| O              | 3.44321400  | -0.15809100 | 1.40197300  | C | -6.61975300 | 0.19903600  | 1.63758500  |
| C              | 3.70951400  | -2.36568000 | -1.20352800 | H | -4.76835600 | -0.90074200 | 1.88338900  |
| O              | 3.42665700  | -3.21775200 | -2.01488900 | H | -4.62644000 | 0.82540600  | 2.19394000  |
| O              | 4.95128000  | -2.16035100 | -0.72647100 | C | -7.13464400 | -0.00156400 | 3.06625100  |
| C              | 5.97276900  | -3.03059100 | -1.25143700 | H | -6.93862300 | 1.18235700  | 1.26669400  |
| H              | 6.05272500  | -2.91206400 | -2.33427600 | H | -7.08192100 | -0.54208900 | 0.97230700  |
| H              | 6.89649400  | -2.72463200 | -0.76182000 | H | -8.22532400 | 0.07934500  | 3.11034300  |
| H              | 5.73904700  | -4.07277300 | -1.02232000 | H | -6.85843000 | -0.98964600 | 3.45138100  |
| C              | -1.06302100 | -1.22084300 | -0.26301900 | H | -6.71784200 | 0.74813700  | 3.74846700  |
| C              | -0.61591600 | 1.53927000  | -0.53900900 | H | -0.63926500 | -0.04838000 | 2.10600800  |
| H              | -0.45201900 | 2.49277000  | -1.03030000 | H | -2.22526400 | 0.68049000  | 2.42827000  |
| C              | 2.93078500  | -0.00965500 | -1.38534100 | C | -3.02974900 | 1.68626200  | -2.57026300 |
| H              | 2.99492000  | -0.22927200 | -2.45840100 | O | -3.71620400 | 2.48932200  | -3.02162100 |
| H              | 3.89562700  | 0.41719900  | -1.10941600 | C | -0.23911000 | 1.45839200  | -4.54372000 |
| S              | 2.26579800  | 2.63532800  | -1.69748200 | C | 0.98704000  | 1.34402500  | -5.43986600 |
| O              | 1.09628800  | 3.35688200  | -2.25041000 | C | 0.80329700  | -0.98776200 | -5.42187100 |
| O              | 3.43861300  | 2.43642200  | -2.57154200 | C | -0.42748400 | -0.89579200 | -4.52934200 |
| C              | 2.80470400  | 3.60225800  | -0.26841700 | O | 0.92866300  | 0.16669200  | -6.24005400 |
| C              | 2.41869600  | 4.94403400  | -0.22239800 | O | -0.34845500 | 0.28626000  | -3.70998900 |
| C              | 3.64425800  | 3.05164600  | 0.70267800  | H | 1.70605600  | -1.11681000 | -4.80032700 |
| C              | 2.88538600  | 5.74931000  | 0.81755200  | H | 0.72096400  | -1.84857200 | -6.09320900 |
| H              | 1.76037600  | 5.33675100  | -0.98913500 | H | -1.34344600 | -0.85912100 | -5.13166300 |
| C              | 4.09562600  | 3.86710000  | 1.74116800  | H | -0.50355700 | -1.74800000 | -3.85169100 |

|             |             |             |             |   |             |             |             |
|-------------|-------------|-------------|-------------|---|-------------|-------------|-------------|
| H           | 1.03369200  | 2.19386200  | -6.12759900 | C | -0.83262400 | 1.42892000  | 1.71630400  |
| H           | 1.89869100  | 1.34777100  | -4.82218800 | C | -2.01782200 | 0.50549900  | 1.90638200  |
| H           | -0.14628700 | 2.31461700  | -3.87508600 | C | 0.35826300  | 0.94561400  | 2.56530800  |
| H           | -1.14807400 | 1.54804500  | -5.15690800 | H | 0.66052300  | -0.07073000 | 2.29677800  |
| <b>TS3b</b> |             |             |             | H | 1.22546800  | 1.59616500  | 2.43810100  |
| C           | 0.58299300  | 0.66783900  | -0.35302900 | H | 0.08860100  | 0.94809600  | 3.62851000  |
| C           | 0.37727900  | -0.79865100 | -0.51815300 | C | -1.27518500 | 2.82779000  | 2.20255200  |
| Rh          | -2.21099100 | 0.44135100  | -0.61744800 | H | -1.59268900 | 2.79966600  | 3.25119700  |
| Cl          | -4.03621200 | -1.00276700 | -1.51699100 | H | -0.44278900 | 3.53284400  | 2.11920800  |
| C           | 1.40278800  | -1.52059000 | -1.37545100 | H | -2.10614800 | 3.21141500  | 1.60168700  |
| C           | 1.71120500  | 1.23501600  | -0.88498800 | C | -1.00237500 | -2.90365100 | -0.75862300 |
| H           | 1.39868700  | -2.58953400 | -1.18014800 | H | -0.47136500 | -3.06451000 | -1.69500300 |
| H           | 1.15383000  | -1.38008500 | -2.43403800 | H | -0.73670400 | -3.70649600 | -0.05921500 |
| H           | 4.75231500  | -2.54796300 | 2.05707000  | H | -2.07197800 | -2.96809400 | -0.97185700 |
| C           | 3.71742100  | -2.86904600 | 1.91840400  | C | -1.75030400 | -1.29854800 | 0.91052100  |
| O           | 3.25906500  | -2.52868400 | 0.59749200  | C | -2.64293400 | -2.01007700 | 1.43209800  |
| H           | 3.63789300  | -3.95357400 | 1.98579800  | C | -3.81551000 | -2.56477200 | 2.07441000  |
| H           | 3.09228400  | -2.38961100 | 2.67557900  | C | -3.85686300 | -2.41888000 | 3.61461000  |
| C           | 3.30695600  | -1.21883300 | 0.28197800  | H | -3.87761000 | -3.63317700 | 1.81350800  |
| C           | 2.83014500  | -0.99574900 | -1.16279300 | H | -4.69709000 | -2.10046200 | 1.60549700  |
| O           | 3.68343100  | -0.36079200 | 1.05038500  | C | -5.11073400 | -3.06369800 | 4.21831500  |
| C           | 3.78161000  | -1.75507500 | -2.10276800 | H | -2.95699100 | -2.87482200 | 4.04551200  |
| O           | 3.43675400  | -2.48990800 | -2.99962000 | H | -3.82999600 | -1.35510900 | 3.88058700  |
| O           | 5.06424200  | -1.45784000 | -1.81921800 | C | -5.17801900 | -2.91899900 | 5.74149800  |
| C           | 6.04860200  | -2.07249300 | -2.67258900 | H | -6.00289800 | -2.61256000 | 3.76488100  |
| H           | 5.89153700  | -1.77270700 | -3.71107900 | H | -5.13473300 | -4.12757500 | 3.94690200  |
| H           | 7.01226600  | -1.71597500 | -2.31080000 | H | -6.08081500 | -3.38903600 | 6.14349600  |
| H           | 5.98691000  | -3.16101600 | -2.60244400 | H | -4.31431300 | -3.38968400 | 6.22451600  |
| C           | -0.73309400 | -1.53444200 | -0.13800700 | H | -5.19145100 | -1.86475500 | 6.04006200  |
| C           | -0.55915400 | 1.46779300  | 0.18353600  | C | -3.16700500 | 2.00541800  | -0.88653300 |
| H           | -0.49464900 | 2.49247900  | -0.16491500 | O | -3.79766200 | 2.95460500  | -1.06700600 |
| C           | 2.86890800  | 0.49366700  | -1.51327000 | C | -0.85505000 | 1.56648500  | -3.98493200 |
| H           | 2.83645000  | 0.60477900  | -2.60461000 | C | -0.10675300 | 1.39394800  | -5.30121800 |
| H           | 3.81736700  | 0.92859700  | -1.19749500 | C | -1.09499900 | -0.71315600 | -5.58922800 |
| S           | 1.95698200  | 3.02929600  | -1.06308800 | C | -1.84643900 | -0.54294300 | -4.27443500 |
| O           | 0.72519400  | 3.68179100  | -1.55692000 | O | -0.82828700 | 0.54920200  | -6.19135500 |
| O           | 3.19473700  | 3.17970500  | -1.84980600 | O | -1.08629000 | 0.28522300  | -3.38518600 |
| C           | 2.29358800  | 3.69660800  | 0.57865100  | H | -0.15035200 | -1.25486300 | -5.40972000 |
| C           | 1.68591500  | 4.90203600  | 0.93344700  | H | -1.69255500 | -1.28505600 | -6.30651800 |
| C           | 3.23557700  | 3.07991200  | 1.40760200  | H | -2.82951000 | -0.08632300 | -4.45302600 |
| C           | 2.02520300  | 5.49980100  | 2.14922000  | H | -2.00635800 | -1.49541100 | -3.76496800 |
| H           | 0.96369500  | 5.35425700  | 0.26229700  | H | 0.01817700  | 2.35637500  | -5.80709300 |
| C           | 3.55797400  | 3.68468700  | 2.62313300  | H | 0.89294000  | 0.97103500  | -5.10262900 |
| H           | 3.68902700  | 2.13386400  | 1.12871800  | H | -0.28308800 | 2.16348300  | -3.27100300 |
| C           | 2.95826500  | 4.89228600  | 2.99176000  | H | -1.81940600 | 2.06353100  | -4.17114100 |
| H           | 1.56055900  | 6.43871900  | 2.43512100  | H | -1.97659300 | -0.07812900 | 2.81746300  |
| H           | 4.28113800  | 3.21175900  | 3.28073000  | H | -3.00241400 | 0.93965100  | 1.76231600  |
| H           | 3.21904200  | 5.35933700  | 3.93702700  |   |             |             |             |

**INT-3b**

|    |             |             |             |              |             |             |             |
|----|-------------|-------------|-------------|--------------|-------------|-------------|-------------|
| C  | 0.88646400  | 0.40749000  | -0.17134400 | H            | 0.10262400  | 0.33125100  | 3.94397100  |
| C  | 0.82415000  | -1.06815800 | -0.06855300 | C            | 0.31495000  | 2.63473600  | 2.63003400  |
| Rh | -2.20721700 | 1.03144500  | 0.12300400  | H            | 0.08488300  | 2.73607200  | 3.69732100  |
| Cl | -4.72309600 | 1.45485400  | -0.03228400 | H            | 1.40328100  | 2.64606900  | 2.51278500  |
| C  | 2.05319800  | -1.91275900 | -0.35503800 | H            | -0.08408500 | 3.51656200  | 2.11905400  |
| C  | 1.89981400  | 0.92061100  | -0.93672200 | C            | -0.36312300 | -3.26394000 | 0.22297800  |
| H  | 2.22771500  | -2.61471300 | 0.46586700  | H            | -0.03596100 | -3.69858000 | -0.72890300 |
| H  | 1.87497100  | -2.53516000 | -1.23943900 | H            | 0.30662100  | -3.65299300 | 0.99883300  |
| H  | 5.89838600  | -0.96360200 | 2.51184200  | H            | -1.36870200 | -3.62998300 | 0.43090400  |
| C  | 4.90880300  | -1.37287900 | 2.72764600  | C            | -1.61196300 | -1.13764200 | 0.39067200  |
| O  | 4.21885900  | -1.68611400 | 1.50385800  | C            | -2.81935700 | -1.13656600 | 0.68127100  |
| H  | 4.99067200  | -2.31583600 | 3.26721600  | C            | -4.17165000 | -1.48319600 | 1.13400000  |
| H  | 4.34102900  | -0.64392100 | 3.31055900  | C            | -4.27176700 | -2.95875400 | 1.57485500  |
| C  | 4.02440700  | -0.65002000 | 0.66340600  | H            | -4.88933900 | -1.26171000 | 0.33722700  |
| C  | 3.33831700  | -1.12102300 | -0.62852700 | H            | -4.45405600 | -0.81449500 | 1.95624800  |
| O  | 4.37563200  | 0.48159300  | 0.91448600  | C            | -5.68118400 | -3.31677100 | 2.06383100  |
| C  | 4.33359400  | -2.02673100 | -1.38285100 | H            | -3.99875200 | -3.61028800 | 0.73420900  |
| O  | 4.04208900  | -3.04079700 | -1.97586100 | H            | -3.54297600 | -3.15434400 | 2.37198900  |
| O  | 5.57448000  | -1.50892000 | -1.34368500 | C            | -5.80507400 | -4.77818000 | 2.50567100  |
| C  | 6.58018600  | -2.23978400 | -2.07170700 | H            | -5.95239400 | -2.65209000 | 2.89704300  |
| H  | 6.31780600  | -2.29437400 | -3.13054300 | H            | -6.40406000 | -3.10985800 | 1.26397400  |
| H  | 7.50449300  | -1.68047600 | -1.93280100 | H            | -6.81941400 | -5.00366700 | 2.84962900  |
| H  | 6.67637300  | -3.25292900 | -1.67463800 | H            | -5.57328800 | -5.46342300 | 1.68235000  |
| C  | -0.33298000 | -1.74359500 | 0.17531100  | H            | -5.11708000 | -5.00435500 | 3.32826000  |
| C  | -0.11423400 | 1.28073100  | 0.50708400  | C            | -2.29413900 | 2.90327800  | -0.23127100 |
| H  | 0.06508900  | 2.29645600  | 0.17863000  | O            | -2.36157000 | 4.02916800  | -0.42731800 |
| C  | 3.00508100  | 0.07943300  | -1.53490300 | C            | -2.05810900 | 1.50667800  | -3.23532800 |
| H  | 2.70514700  | -0.30588900 | -2.51904000 | C            | -1.81106700 | 0.93742100  | -4.62486200 |
| H  | 3.89258200  | 0.68823200  | -1.70041000 | C            | -3.09695300 | -0.94228900 | -4.11299700 |
| S  | 1.96550800  | 2.64403900  | -1.53735100 | C            | -3.36235600 | -0.39774400 | -2.71513300 |
| O  | 0.61969800  | 3.03235000  | -2.01428000 | O            | -2.89089100 | 0.11045200  | -5.04421900 |
| O  | 3.09383000  | 2.68066000  | -2.48487000 | O            | -2.26284000 | 0.43067300  | -2.29435100 |
| C  | 2.37198500  | 3.76627500  | -0.18511500 | H            | -2.21741600 | -1.60816000 | -4.09002200 |
| C  | 1.57468900  | 4.90008000  | -0.01790000 | H            | -3.95969500 | -1.51678300 | -4.46557400 |
| C  | 3.52371000  | 3.55871500  | 0.57750200  | H            | -4.28784900 | 0.18968800  | -2.68563800 |
| C  | 1.93513500  | 5.84280000  | 0.94626000  | H            | -3.43383100 | -1.20826600 | -1.98655400 |
| H  | 0.69366000  | 5.03130400  | -0.63613100 | H            | -1.72551100 | 1.74682700  | -5.35606700 |
| C  | 3.86366200  | 4.50444700  | 1.54527400  | H            | -0.86953300 | 0.36373700  | -4.62604000 |
| H  | 4.12689200  | 2.66919100  | 0.43866300  | H            | -1.19182600 | 2.06961700  | -2.88576800 |
| C  | 3.07488100  | 5.64384400  | 1.72777100  | H            | -2.95005200 | 2.14904500  | -3.24234500 |
| H  | 1.32481700  | 6.73014200  | 1.08472600  | H            | -2.30364600 | 0.55918200  | 2.67861500  |
| H  | 4.75006800  | 4.35195400  | 2.15369900  | H            | -2.25906800 | 2.33289900  | 2.44743200  |
| H  | 3.35055600  | 6.37803000  | 2.47928000  | <b>TS3bb</b> |             |             |             |
| C  | -0.29675400 | 1.33643000  | 2.07340300  | C            | -0.20000800 | -1.35340700 | 0.47358600  |
| C  | -1.83636400 | 1.37884700  | 2.13031400  | C            | 0.06230900  | -2.76013100 | 0.13302200  |
| C  | 0.27418200  | 0.15650500  | 2.87585300  | Rh           | -0.89748400 | -0.46357000 | -2.55557700 |
| H  | -0.19074800 | -0.79534200 | 2.61729700  | Cl           | -0.18786900 | -0.24860600 | -4.87869200 |
| H  | 1.35560100  | 0.06129800  | 2.72529200  | C            | 1.24503700  | -3.48762400 | 0.72455100  |



|   |             |             |             |                |             |             |             |
|---|-------------|-------------|-------------|----------------|-------------|-------------|-------------|
| C | 0.63820800  | -0.69599900 | 1.31478600  | C              | -0.70853600 | -4.70819800 | -1.30674700 |
| H | 1.02471100  | -4.54328600 | 0.89568500  | H              | -0.14521600 | -5.36192000 | -0.63809600 |
| H | 2.07730200  | -3.46657000 | 0.01175100  | H              | -1.71895900 | -5.12028200 | -1.41230500 |
| H | 0.39202300  | -4.67468700 | 5.39045200  | H              | -0.23861500 | -4.76194900 | -2.29692700 |
| C | -0.05961400 | -5.00195600 | 4.45109100  | C              | -1.77091300 | -2.38887600 | -1.46356200 |
| O | 0.72420200  | -4.54788800 | 3.33288700  | C              | -1.59802000 | -2.15014000 | -2.86009000 |
| H | -0.06320700 | -6.08942600 | 4.38404000  | C              | -1.96125400 | -2.93471800 | -4.07608600 |
| H | -1.07705000 | -4.60856800 | 4.38982100  | C              | -3.27357300 | -2.43512000 | -4.73344500 |
| C | 0.87094200  | -3.21152500 | 3.22751600  | H              | -2.06770000 | -3.99907700 | -3.82573500 |
| C | 1.76782900  | -2.85720900 | 2.03065600  | H              | -1.15787200 | -2.81924400 | -4.81143300 |
| O | 0.36276400  | -2.42653300 | 3.99768400  | C              | -3.62324100 | -3.23618000 | -5.99303000 |
| C | 3.17346700  | -3.42124900 | 2.31885700  | H              | -4.10071500 | -2.49998900 | -4.01373600 |
| O | 3.86076900  | -4.02153500 | 1.52447300  | H              | -3.14332900 | -1.37777200 | -4.98473200 |
| O | 3.55989800  | -3.11718800 | 3.57157000  | C              | -4.90902400 | -2.74619700 | -6.66709100 |
| C | 4.88846100  | -3.54063300 | 3.93404700  | H              | -2.78793900 | -3.16707100 | -6.70161600 |
| H | 5.62721600  | -3.07111400 | 3.28078200  | H              | -3.72453800 | -4.30010000 | -5.73726100 |
| H | 5.02642900  | -3.21753500 | 4.96513400  | H              | -5.13213700 | -3.32683500 | -7.56818800 |
| H | 4.97763700  | -4.62637600 | 3.85242400  | H              | -5.76986600 | -2.83337200 | -5.99397300 |
| C | -0.75482900 | -3.28885200 | -0.80621600 | H              | -4.82328300 | -1.69437900 | -6.96098700 |
| C | -1.40916700 | -0.77735700 | -0.18206700 | H              | -3.43412000 | -3.29227800 | -0.37035700 |
| H | -1.33795800 | 0.30280000  | -0.21679900 | H              | -3.91211100 | -2.00333800 | -1.48945800 |
| C | 1.89259800  | -1.32356600 | 1.88502200  | C              | 2.35139600  | -0.89502000 | -2.46276900 |
| H | 2.72804600  | -1.09522700 | 1.20838600  | C              | 3.81761700  | -0.56005800 | -2.13606700 |
| H | 2.14315600  | -0.88292800 | 2.84898500  | C              | 3.28541100  | 1.41720000  | -0.99178800 |
| S | 0.47889900  | 1.07209300  | 1.71181100  | C              | 2.06589400  | 1.40255500  | -1.93674600 |
| O | 0.04401300  | 1.82575000  | 0.51521800  | O              | 3.88963400  | 0.12261200  | -0.89527200 |
| O | 1.74713600  | 1.44545400  | 2.36466500  | O              | 1.47224800  | 0.10007600  | -1.90699900 |
| C | -0.83946500 | 1.25913200  | 2.93070800  | H              | 4.02208200  | 2.15521300  | -1.34993400 |
| C | -1.84104400 | 2.19728900  | 2.67172000  | H              | 2.99164500  | 1.68414700  | 0.02524300  |
| C | -0.79136400 | 0.55231000  | 4.13499100  | H              | 1.30514300  | 2.09875200  | -1.58531200 |
| C | -2.82077500 | 2.42553000  | 3.63991400  | H              | 2.33759800  | 1.65996200  | -2.96911500 |
| H | -1.83669900 | 2.73781500  | 1.73188200  | H              | 4.40679300  | -1.47676400 | -2.03998300 |
| C | -1.78312700 | 0.78447700  | 5.08838400  | H              | 4.27300000  | 0.04505300  | -2.93589100 |
| H | -0.01929000 | -0.18593500 | 4.31548800  | H              | 2.18578900  | -0.97238000 | -3.54477300 |
| C | -2.79296200 | 1.71922400  | 4.84400900  | H              | 2.04991600  | -1.83495500 | -1.99196900 |
| H | -3.60207700 | 3.15589800  | 3.45223100  | C              | -1.63069100 | 1.39444000  | -2.63048000 |
| H | -1.76315200 | 0.23466100  | 6.02445500  | O              | -2.32171900 | 2.27935100  | -2.88195200 |
| H | -3.55814200 | 1.89785000  | 5.59392500  | <b>INT-4bb</b> |             |             |             |
| C | -2.84793500 | -1.23047200 | 0.27642700  | C              | -0.30520500 | -1.64461400 | 0.94850800  |
| C | -3.14023900 | -2.31828500 | -0.78147600 | C              | 0.11041000  | -3.00388600 | 0.59099100  |
| C | -2.89948400 | -1.76714900 | 1.71623100  | Rh             | -2.85855300 | -2.46148200 | -3.64858300 |
| H | -2.24042400 | -2.62879300 | 1.85374200  | Cl             | -2.90327200 | -0.16784500 | -4.36674000 |
| H | -2.61177400 | -1.00211400 | 2.44204500  | C              | 1.34045700  | -3.61646400 | 1.20147200  |
| H | -3.92109700 | -2.08673500 | 1.95220000  | C              | 0.44585700  | -0.88605300 | 1.77827400  |
| C | -3.82348500 | -0.05238500 | 0.13365700  | H              | 1.23019600  | -4.69462000 | 1.33672800  |
| H | -4.85120200 | -0.38099100 | 0.32573300  | H              | 2.19832000  | -3.47737100 | 0.53385600  |
| H | -3.58259900 | 0.74079800  | 0.84887300  | H              | 0.21704900  | -4.94026600 | 5.76058100  |
| H | -3.78822000 | 0.37349600  | -0.87385300 | C              | -0.17955600 | -5.24114000 | 4.78812200  |

|   |             |             |             |              |             |             |             |
|---|-------------|-------------|-------------|--------------|-------------|-------------|-------------|
| O | 0.64748500  | -4.72529000 | 3.72874600  | C            | -1.61377700 | -2.14762800 | -2.25826300 |
| H | -0.15244400 | -6.32488400 | 4.67945400  | C            | -0.38155400 | -1.35471800 | -2.58246000 |
| H | -1.20192300 | -4.86890200 | 4.69027900  | C            | 0.44156900  | -1.86795400 | -3.78519900 |
| C | 0.75911400  | -3.38286000 | 3.67934000  | H            | 0.26900200  | -1.25463800 | -1.70587200 |
| C | 1.71150300  | -2.95586100 | 2.54946400  | H            | -0.75046300 | -0.34844700 | -2.83911500 |
| O | 0.18918000  | -2.63984000 | 4.44781600  | C            | 1.65267100  | -0.97251800 | -4.07520500 |
| C | 3.13478600  | -3.40089000 | 2.93655000  | H            | 0.78152200  | -2.89343400 | -3.58634800 |
| O | 3.94439600  | -3.87704300 | 2.17340700  | H            | -0.20594500 | -1.91559800 | -4.66702300 |
| O | 3.38229900  | -3.14640800 | 4.23459300  | C            | 2.48993700  | -1.47443600 | -5.25563600 |
| C | 4.70869700  | -3.47286300 | 4.69269400  | H            | 1.30148100  | 0.04714200  | -4.27844800 |
| H | 5.45438200  | -2.90002400 | 4.13699200  | H            | 2.28376900  | -0.90656500 | -3.17868200 |
| H | 4.72650200  | -3.20519700 | 5.74843100  | H            | 3.34511600  | -0.81738400 | -5.44359500 |
| H | 4.90560000  | -4.53911300 | 4.55952800  | H            | 2.87972900  | -2.48175700 | -5.06810800 |
| C | -0.68090600 | -3.52869300 | -0.37594300 | H            | 1.89365100  | -1.51543000 | -6.17413800 |
| C | -1.59355900 | -1.35763400 | 0.22200500  | H            | -3.33835700 | -3.87794800 | 0.09078800  |
| H | -1.63201300 | -0.34797200 | -0.18438700 | H            | -3.97558000 | -2.58049600 | -0.94724500 |
| C | 1.71584700  | -1.41183400 | 2.42019300  | C            | -3.58182500 | -2.72108100 | -6.75495400 |
| H | 2.58438900  | -1.11203100 | 1.82026000  | C            | -4.57880300 | -2.90280900 | -7.88772900 |
| H | 1.85966700  | -0.96533200 | 3.40436700  | C            | -5.78643000 | -1.30450300 | -6.58708400 |
| S | 0.15892800  | 0.87790200  | 2.01394200  | C            | -5.57453200 | -2.27716100 | -5.43842200 |
| O | -0.35300200 | 1.44618300  | 0.75190800  | O            | -5.62564700 | -1.93451000 | -7.85666100 |
| O | 1.40261400  | 1.40233800  | 2.60576700  | O            | -4.24286100 | -2.86130200 | -5.47659400 |
| C | -1.15442800 | 1.07140500  | 3.23674000  | H            | -6.81154400 | -0.92154000 | -6.55250700 |
| C | -2.16578100 | 1.99395900  | 2.96083000  | H            | -5.10058200 | -0.45482700 | -6.47461000 |
| C | -1.10017400 | 0.38897300  | 4.45510400  | H            | -5.67498900 | -1.76184100 | -4.48061800 |
| C | -3.14435100 | 2.23590500  | 3.92680100  | H            | -6.29939500 | -3.09871800 | -5.48886600 |
| H | -2.17431000 | 2.50517700  | 2.00444200  | H            | -4.05832600 | -2.80790200 | -8.84856700 |
| C | -2.09191500 | 0.63255300  | 5.40610900  | H            | -5.00757200 | -3.91562500 | -7.83694600 |
| H | -0.32419200 | -0.34258900 | 4.65049200  | H            | -2.81599700 | -3.50063300 | -6.78740800 |
| C | -3.10803600 | 1.55603900  | 5.14585500  | H            | -3.09292900 | -1.74199200 | -6.80077500 |
| H | -3.93379200 | 2.95363000  | 3.72458300  | C            | -3.21599200 | -4.21385700 | -3.11449000 |
| H | -2.06752500 | 0.10018400  | 6.35218500  | O            | -3.53103500 | -5.28578000 | -2.81637200 |
| H | -3.87305300 | 1.74415400  | 5.89364700  | <b>TS4bb</b> |             |             |             |
| C | -2.97940300 | -1.79095900 | 0.88098000  | C            | 1.79817000  | 0.28355500  | -0.53476100 |
| C | -3.18166200 | -2.84851000 | -0.24629400 | C            | 1.20467500  | -1.03419800 | -0.31085400 |
| C | -2.89885100 | -2.40017400 | 2.28259600  | C            | 2.02488000  | -2.28188400 | -0.42014800 |
| H | -2.19497000 | -3.23623900 | 2.32337400  | C            | 3.09507900  | 0.39430900  | -0.89560100 |
| H | -2.59444300 | -1.66295100 | 3.03080700  | H            | 1.67747300  | -3.05015600 | 0.27428800  |
| H | -3.88535700 | -2.78369300 | 2.56895200  | H            | 1.90789900  | -2.71168700 | -1.42311500 |
| C | -4.01264700 | -0.66246300 | 0.83463400  | H            | 4.76362200  | -2.52266500 | 3.63697300  |
| H | -5.00723100 | -1.04730800 | 1.08974500  | C            | 3.69372600  | -2.64914500 | 3.45695600  |
| H | -3.76438700 | 0.13123500  | 1.54619100  | O            | 3.43584600  | -2.77578100 | 2.04507200  |
| H | -4.07166000 | -0.21771800 | -0.16441800 | H            | 3.33305900  | -3.57453300 | 3.90434500  |
| C | -0.56003300 | -4.88854800 | -0.99148100 | H            | 3.15875400  | -1.78934400 | 3.86661800  |
| H | 0.18193000  | -5.50260200 | -0.47598500 | C            | 3.83282700  | -1.73644000 | 1.28486500  |
| H | -1.51904500 | -5.41767900 | -0.96919700 | C            | 3.52986800  | -2.01032900 | -0.20077400 |
| H | -0.26665100 | -4.82359900 | -2.04672200 | O            | 4.35274600  | -0.73669100 | 1.72523700  |
| C | -1.76648300 | -2.54239600 | -0.81405100 | C            | 4.32383100  | -3.25565700 | -0.63409200 |

|   |             |             |             |                |             |             |             |
|---|-------------|-------------|-------------|----------------|-------------|-------------|-------------|
| O | 3.87506200  | -4.17653600 | -1.27738900 | H              | -4.62433400 | 6.29316400  | -1.44069800 |
| O | 5.60605000  | -3.16410200 | -0.23633500 | H              | -5.45996500 | 4.90184300  | -0.73578400 |
| C | 6.45646700  | -4.26463400 | -0.61516500 | H              | -4.26646700 | 5.78983700  | 0.21752300  |
| H | 6.48735100  | -4.36481200 | -1.70233700 | H              | -1.07939600 | 0.62797800  | 2.07794500  |
| H | 7.44234700  | -4.01997600 | -0.22188700 | H              | -1.70137000 | 2.20602100  | 1.62553300  |
| H | 6.08695800  | -5.19638100 | -0.18104400 | Rh             | -3.60755700 | -0.00492900 | 0.17775700  |
| C | -0.14611500 | -0.95957400 | -0.08403900 | C              | -3.53296500 | -0.58841000 | -1.55714500 |
| C | 0.69685100  | 1.29363300  | -0.34319000 | O              | -3.47463900 | -0.97598200 | -2.65349200 |
| H | 0.69979300  | 2.05413600  | -1.11974800 | Cl             | -3.83549900 | 0.64873000  | 2.53025100  |
| C | 3.99974000  | -0.80831800 | -1.05323800 | C              | -7.04461000 | -2.65253500 | 1.62336200  |
| H | 4.02940000  | -1.10047300 | -2.11063300 | C              | -5.62731600 | -2.14790200 | 1.40289100  |
| H | 5.02076700  | -0.55317100 | -0.76157700 | C              | -6.77507900 | -0.15664400 | 0.63297800  |
| S | 3.82207300  | 1.94381800  | -1.45158200 | C              | -7.43204800 | -0.32593100 | 1.99261900  |
| O | 2.89133000  | 3.04611900  | -1.14985800 | O              | -5.62658900 | -1.03167000 | 0.48614200  |
| O | 4.27492700  | 1.69491100  | -2.83186300 | O              | -7.89314700 | -1.66245600 | 2.19984100  |
| C | 5.29564000  | 2.18436200  | -0.44612400 | H              | -7.48326400 | -0.39402800 | -0.17111100 |
| C | 6.53906900  | 1.84264400  | -0.98207300 | H              | -6.41491200 | 0.86583500  | 0.50517900  |
| C | 5.17872300  | 2.74814000  | 0.82630700  | H              | -6.72207700 | -0.02725300 | 2.77441600  |
| C | 7.68648400  | 2.05803300  | -0.21750800 | H              | -8.31065500 | 0.32476800  | 2.05661800  |
| H | 6.59574600  | 1.43959400  | -1.98734700 | H              | -5.16219400 | -1.83729400 | 2.34467100  |
| C | 6.33197600  | 2.95658500  | 1.58074800  | H              | -5.00940700 | -2.92188900 | 0.93947300  |
| H | 4.20559900  | 3.03554500  | 1.20775200  | H              | -7.46476400 | -2.99486500 | 0.66439900  |
| C | 7.58190200  | 2.60928300  | 1.06111700  | H              | -7.02289300 | -3.51283900 | 2.30351100  |
| H | 8.66034500  | 1.80262200  | -0.62397100 | C              | -1.03183500 | -2.12858600 | 0.21595100  |
| H | 6.25588400  | 3.39564500  | 2.57067100  | H              | -0.48275200 | -2.90673300 | 0.75511500  |
| H | 8.47734500  | 2.77674600  | 1.65240300  | H              | -1.42097800 | -2.57230700 | -0.70799100 |
| C | 0.48728200  | 1.92782400  | 1.09498400  | H              | -1.90511000 | -1.81326200 | 0.79551100  |
| C | -0.98077000 | 1.43274600  | 1.35472400  | <b>INT-5bb</b> |             |             |             |
| C | 1.40690200  | 1.34347500  | 2.17570600  | C              | 0.09284600  | 0.47829400  | -0.43954500 |
| H | 1.34153700  | 0.25307400  | 2.22475300  | C              | -0.11757000 | -0.65588500 | -1.37909000 |
| H | 2.45328000  | 1.60859600  | 2.00436800  | C              | 0.97736000  | -1.12714200 | -2.28617900 |
| H | 1.10965700  | 1.73395700  | 3.15523600  | C              | 1.34212500  | 0.99533600  | -0.34008400 |
| C | 0.60090000  | 3.45830000  | 1.10193000  | H              | 0.82521900  | -2.16423400 | -2.58660200 |
| H | 0.35054200  | 3.84281600  | 2.09730400  | H              | 0.98336400  | -0.53531100 | -3.21004000 |
| H | 1.61570300  | 3.77075200  | 0.84590100  | H              | 3.40094400  | -4.27332800 | 0.50458800  |
| H | -0.07714300 | 3.92689500  | 0.38492200  | C              | 2.34711600  | -4.18013700 | 0.23084600  |
| C | -0.57160700 | 0.43049600  | -0.27021700 | O              | 2.18193900  | -3.19332700 | -0.80440900 |
| C | -1.86130200 | 1.02404600  | -0.16174200 | H              | 1.97669000  | -5.11361100 | -0.19328300 |
| C | -2.09295700 | 2.32796700  | -0.94848800 | H              | 1.76826300  | -3.89048400 | 1.11052100  |
| C | -3.19050200 | 3.25829800  | -0.41632300 | C              | 2.59276600  | -1.95226000 | -0.47404100 |
| H | -2.37633300 | 2.00114800  | -1.95765800 | C              | 2.36258400  | -0.96856200 | -1.63889200 |
| H | -1.17297300 | 2.90968300  | -1.07650200 | O              | 3.11140300  | -1.67186600 | 0.58028500  |
| C | -3.39512400 | 4.49247300  | -1.30565400 | C              | 3.43753000  | -1.24291300 | -2.70709800 |
| H | -4.12678400 | 2.69468900  | -0.33475900 | O              | 3.22512000  | -1.34482900 | -3.89504100 |
| H | -2.95004500 | 3.58669000  | 0.60402000  | O              | 4.66216200  | -1.32190000 | -2.15499700 |
| C | -4.49723400 | 5.42253600  | -0.78890500 | C              | 5.74713100  | -1.53562800 | -3.07614200 |
| H | -2.45233200 | 5.05204200  | -1.38533100 | H              | 5.81013300  | -0.71032400 | -3.78931800 |
| H | -3.63994800 | 4.16688300  | -2.32605700 | H              | 6.64586300  | -1.58287100 | -2.46226600 |

|   |             |             |             |                       |             |             |             |
|---|-------------|-------------|-------------|-----------------------|-------------|-------------|-------------|
| H | 5.60379500  | -2.46933700 | -3.62507300 | H                     | -8.62028200 | -1.50394000 | 0.65840100  |
| C | -1.39159300 | -1.14805700 | -1.34805400 | H                     | -8.77482200 | 0.16971000  | 0.10883500  |
| C | -1.33976600 | 0.85745300  | -0.01527700 | H                     | -4.03976000 | 0.79607900  | 1.92301700  |
| H | -1.61746400 | 1.47935400  | -0.88753600 | H                     | -4.18985500 | 1.69343900  | 0.42672200  |
| C | 2.53533500  | 0.47598500  | -1.13092000 | Rh                    | -2.53655100 | -1.97375600 | 1.36700100  |
| H | 2.70014800  | 1.14596700  | -1.98367400 | C                     | -4.05521600 | -2.87832500 | 0.86703400  |
| H | 3.43694200  | 0.51860300  | -0.51658400 | O                     | -4.90234800 | -3.62424900 | 0.60327600  |
| S | 1.84702400  | 2.44503800  | 0.59787700  | Cl                    | -0.21000200 | -1.68855900 | 2.04176200  |
| O | 0.71296300  | 3.01381400  | 1.34291400  | C                     | -1.81627800 | -5.70577200 | 3.86817400  |
| O | 2.59487200  | 3.30355100  | -0.34098000 | C                     | -1.71464100 | -4.74013900 | 2.69864100  |
| C | 3.02140400  | 1.80527600  | 1.80493500  | C                     | -2.38102500 | -3.07481000 | 4.34879100  |
| C | 4.28247400  | 2.39849200  | 1.87671700  | C                     | -1.21411500 | -3.73041700 | 5.06912900  |
| C | 2.63327500  | 0.78785900  | 2.67946000  | O                     | -2.48998300 | -3.54991600 | 2.97439600  |
| C | 5.17370800  | 1.96785800  | 2.86049400  | O                     | -1.32129200 | -5.15135100 | 5.08555700  |
| H | 4.54651800  | 3.17936100  | 1.17177400  | H                     | -3.32963300 | -3.30888400 | 4.84527000  |
| C | 3.53835400  | 0.36316500  | 3.65129600  | H                     | -2.24375800 | -1.99292300 | 4.30941700  |
| H | 1.65882900  | 0.31709200  | 2.59234200  | H                     | -0.27262900 | -3.40737200 | 4.60603200  |
| C | 4.80127300  | 0.95341800  | 3.74498600  | H                     | -1.20884700 | -3.40227100 | 6.11352300  |
| H | 6.15753600  | 2.42211500  | 2.93260700  | H                     | -0.67977800 | -4.45074200 | 2.49121200  |
| H | 3.25660300  | -0.43566100 | 4.33024500  | H                     | -2.14766900 | -5.17926900 | 1.79657800  |
| H | 5.49973400  | 0.61721100  | 4.50614000  | H                     | -2.86615100 | -6.00825200 | 3.99999000  |
| C | -2.11142300 | 1.59526200  | 1.15238900  | H                     | -1.23421800 | -6.60798200 | 3.64246700  |
| C | -3.54780400 | 0.97841400  | 0.96193200  | <b>P2<sup>B</sup></b> |             |             |             |
| C | -1.62479800 | 1.37690400  | 2.59253700  | C                     | 0.28356400  | 0.78929200  | -0.96848500 |
| H | -1.62575900 | 0.32463400  | 2.87611600  | C                     | -0.15416500 | -0.26580100 | -1.89679800 |
| H | -0.61798400 | 1.77043100  | 2.72894200  | C                     | 0.84718900  | -1.13361800 | -2.60193500 |
| H | -2.29423300 | 1.91771800  | 3.27279300  | C                     | 1.61185500  | 0.98674300  | -0.76617100 |
| C | -2.23024900 | 3.11218300  | 0.88514600  | H                     | 0.43018700  | -2.10955800 | -2.85796400 |
| H | -2.95024100 | 3.55151600  | 1.58549200  | H                     | 1.15872300  | -0.67210700 | -3.54682800 |
| H | -1.27659800 | 3.62067900  | 1.00727600  | H                     | 1.93752400  | -4.51134700 | 0.76031100  |
| H | -2.60220800 | 3.30569500  | -0.12894100 | C                     | 1.01957200  | -4.26464900 | 0.22153800  |
| C | -1.94740000 | -2.25994500 | -2.18862600 | O                     | 1.30106000  | -3.36079900 | -0.86186400 |
| H | -2.46245500 | -2.99833500 | -1.56640900 | H                     | 0.59474100  | -5.15453900 | -0.24199000 |
| H | -2.67604500 | -1.87888800 | -2.91474800 | H                     | 0.30828000  | -3.81548200 | 0.91852900  |
| H | -1.16626700 | -2.77698500 | -2.74920300 | C                     | 1.83583300  | -2.17535400 | -0.50685100 |
| C | -2.13423000 | -0.40719900 | -0.33952800 | C                     | 2.11967400  | -1.31621900 | -1.74914400 |
| C | -3.46058300 | -0.27926900 | 0.10180600  | O                     | 2.05971800  | -1.86755200 | 0.64360900  |
| C | -4.69097000 | -0.61529200 | -0.73373500 | C                     | 3.19031200  | -2.03309000 | -2.58911000 |
| C | -6.04563500 | -0.55841300 | -0.00921000 | O                     | 3.15271900  | -2.17867700 | -3.78967000 |
| H | -4.57521600 | -1.57450500 | -1.24518600 | O                     | 4.21089600  | -2.44564600 | -1.81202800 |
| H | -4.71059600 | 0.14456500  | -1.53250700 | C                     | 5.30050300  | -3.08470200 | -2.50331900 |
| C | -7.21459100 | -0.95918600 | -0.91835000 | H                     | 5.74784100  | -2.39786700 | -3.22542900 |
| H | -6.03458900 | -1.20965900 | 0.87240000  | H                     | 6.02040100  | -3.35176300 | -1.73048200 |
| H | -6.21455900 | 0.45815300  | 0.36767700  | H                     | 4.94858000  | -3.97523600 | -3.02932200 |
| C | -8.57589600 | -0.85543200 | -0.22386900 | C                     | -1.51108800 | -0.25811200 | -2.07563600 |
| H | -7.21197600 | -0.32575300 | -1.81623500 | C                     | -0.97275000 | 1.55535600  | -0.55157400 |
| H | -7.06007900 | -1.98821800 | -1.26937800 | H                     | -0.91982400 | 2.53992900  | -1.03701500 |
| H | -9.38924600 | -1.15079700 | -0.89440000 | C                     | 2.67753500  | 0.06521300  | -1.33739600 |

|   |             |             |             |    |             |             |             |
|---|-------------|-------------|-------------|----|-------------|-------------|-------------|
| H | 3.13839300  | 0.53654500  | -2.21329800 | C  | -0.08068700 | -1.86046400 | 0.96528600  |
| H | 3.48439000  | -0.07621300 | -0.61507200 | C  | 0.11164300  | -3.29287900 | 0.72469800  |
| S | 2.30328900  | 2.50007600  | -0.09270500 | Rh | -2.43153900 | -2.93905600 | -3.87457400 |
| O | 1.32429600  | 3.59374100  | -0.23454200 | Cl | -3.27773700 | -0.61663400 | -3.75300900 |
| O | 3.62666800  | 2.64487400  | -0.72970600 | C  | 1.13974000  | -4.07165400 | 1.49863000  |
| C | 2.58926300  | 2.26167200  | 1.67563900  | C  | 0.74558600  | -1.18026100 | 1.79202600  |
| C | 2.75224900  | 3.41906800  | 2.44387400  | H  | 0.79833800  | -5.08826000 | 1.70833900  |
| C | 2.71328500  | 0.99126100  | 2.24027900  | H  | 2.05981700  | -4.17436500 | 0.91240500  |
| C | 3.04829500  | 3.29791400  | 3.80049900  | H  | -0.58655500 | -4.71094800 | 6.01437100  |
| H | 2.63271500  | 4.39416600  | 1.98344500  | C  | -0.96235000 | -5.01403300 | 5.03430500  |
| C | 3.00460700  | 0.88640700  | 3.60336400  | O  | 0.03098300  | -4.77335600 | 4.02090300  |
| H | 2.57043200  | 0.09434800  | 1.64625800  | H  | -1.15210700 | -6.08667600 | 5.00938100  |
| C | 3.17545200  | 2.03263400  | 4.38051300  | H  | -1.87518700 | -4.45573800 | 4.81429300  |
| H | 3.17437700  | 4.19109400  | 4.40528000  | C  | 0.42522300  | -3.49134200 | 3.88597000  |
| H | 3.09578700  | -0.09759500 | 4.05367300  | C  | 1.52804200  | -3.36736300 | 2.82058000  |
| H | 3.40284700  | 1.94217800  | 5.43880600  | O  | -0.03208100 | -2.58313800 | 4.54457500  |
| C | -1.52726100 | 1.78097800  | 0.90601400  | C  | 2.80221100  | -4.03214100 | 3.37488000  |
| C | -3.05886600 | 1.87746700  | 0.58611200  | O  | 3.57619300  | -4.69833700 | 2.72523200  |
| C | -1.25870200 | 0.55208600  | 1.79243900  | O  | 2.97639700  | -3.73285200 | 4.67571200  |
| H | -1.64528800 | -0.36535600 | 1.33688300  | C  | 4.17468000  | -4.25462800 | 5.28091300  |
| H | -0.18730700 | 0.41816300  | 1.96673100  | H  | 5.05863200  | -3.86258800 | 4.77288000  |
| H | -1.74276900 | 0.67355500  | 2.76816700  | H  | 4.14713900  | -3.92054800 | 6.31738700  |
| C | -1.06390200 | 3.05423000  | 1.62230900  | H  | 4.18574300  | -5.34559700 | 5.22529300  |
| H | -1.69203900 | 3.22047500  | 2.50649200  | C  | -0.66450500 | -3.72850200 | -0.29863600 |
| H | -0.02957200 | 2.98866200  | 1.95961000  | C  | -1.24480400 | -1.42085000 | 0.12046500  |
| H | -1.14370700 | 3.93201000  | 0.97507700  | H  | -1.10782500 | -0.42856300 | -0.30868800 |
| C | -2.29281800 | -1.15530700 | -2.98764300 | C  | 1.84730200  | -1.87093400 | 2.57198900  |
| H | -3.02668500 | -1.74464600 | -2.42557100 | H  | 2.79580000  | -1.80242200 | 2.02393900  |
| H | -2.85459500 | -0.56779600 | -3.72320800 | H  | 2.00952100  | -1.36867000 | 3.52610600  |
| H | -1.65008200 | -1.84883400 | -3.53406800 | S  | 0.78279200  | 0.61593800  | 1.85384000  |
| C | -2.08614100 | 0.72901100  | -1.18047400 | O  | 0.56451900  | 1.13732400  | 0.48753200  |
| C | -3.27851000 | 0.93908300  | -0.58608800 | O  | 2.01893200  | 0.96654900  | 2.57672300  |
| C | -4.62283100 | 0.33844500  | -0.88837500 | C  | -0.61454400 | 1.16939300  | 2.85107400  |
| C | -5.03217000 | -0.79263600 | 0.08013700  | C  | -1.37298200 | 2.24039100  | 2.37510800  |
| H | -4.65122000 | -0.04158400 | -1.91515700 | C  | -0.85996000 | 0.59767200  | 4.10259400  |
| H | -5.38384900 | 1.13101300  | -0.83580800 | C  | -2.40048100 | 2.74980500  | 3.17137300  |
| C | -6.44030100 | -1.33710500 | -0.19154500 | H  | -1.15505500 | 2.65488500  | 1.39700300  |
| H | -4.30096800 | -1.60916700 | 0.00627100  | C  | -1.89779100 | 1.11010700  | 4.88199800  |
| H | -4.97653200 | -0.42906900 | 1.11461800  | H  | -0.27732200 | -0.24747200 | 4.45324900  |
| C | -6.84215500 | -2.46895500 | 0.75940800  | C  | -2.66263800 | 2.18535200  | 4.42135800  |
| H | -7.16582000 | -0.51617800 | -0.11224500 | H  | -2.99599100 | 3.58394600  | 2.81250400  |
| H | -6.49772400 | -1.69222100 | -1.22967200 | H  | -2.10623100 | 0.66840000  | 5.85184600  |
| H | -7.85075200 | -2.83505400 | 0.54157200  | H  | -3.46545800 | 2.58139600  | 5.03654800  |
| H | -6.15519200 | -3.31905700 | 0.67730100  | C  | -2.73525100 | -1.62035100 | 0.65889300  |
| H | -6.82827300 | -2.13389000 | 1.80280200  | C  | -2.99322700 | -2.64264700 | -0.49258600 |
| H | -3.67029300 | 1.61416800  | 1.45929700  | C  | -2.87217900 | -2.21660000 | 2.06149500  |
| H | -3.33029800 | 2.91206600  | 0.32138900  | H  | -2.32423600 | -3.15792600 | 2.16089000  |
|   |             |             |             | H  | -2.50903000 | -1.52743200 | 2.83016300  |

TS4dd

|                |             |             |             |   |             |             |             |
|----------------|-------------|-------------|-------------|---|-------------|-------------|-------------|
| H              | -3.92883300 | -2.42536700 | 2.26755700  | C | 0.68467300  | -1.04135300 | 1.71371900  |
| C              | -3.57396800 | -0.34621800 | 0.52927300  | H | 0.70653700  | -4.94137700 | 1.43849300  |
| H              | -4.63176300 | -0.56992100 | 0.71339400  | H | 1.91297900  | -3.99705100 | 0.59609700  |
| H              | -3.25911100 | 0.41283600  | 1.25251800  | H | -0.33043500 | -4.78129900 | 5.85192700  |
| H              | -3.49708900 | 0.08070400  | -0.47597100 | C | -0.77851600 | -5.04386700 | 4.89075000  |
| C              | -0.73813400 | -5.13074100 | -0.81570800 | O | 0.13231500  | -4.74916100 | 3.81619600  |
| H              | -0.33118500 | -5.84899400 | -0.09878300 | H | -0.96341200 | -6.11607900 | 4.83216100  |
| H              | -1.77360200 | -5.40950300 | -1.03853200 | H | -1.70894700 | -4.48484300 | 4.76725900  |
| H              | -0.18022700 | -5.24664900 | -1.75166400 | C | 0.51127000  | -3.45916200 | 3.71221200  |
| C              | -1.49035900 | -2.59422700 | -0.89531900 | C | 1.53055600  | -3.27898000 | 2.57472200  |
| C              | -1.15033900 | -2.34045700 | -2.37360800 | O | 0.10148600  | -2.58680800 | 4.44606200  |
| C              | 0.03077000  | -1.65036600 | -2.62462400 | C | 2.83991000  | -3.97138200 | 2.99803200  |
| C              | 0.58018200  | -1.28436200 | -3.96365600 | O | 3.55168100  | -4.61928100 | 2.26425100  |
| H              | 0.61074000  | -1.28090200 | -1.77115800 | O | 3.12260800  | -3.72009800 | 4.28999500  |
| H              | -1.46992900 | -1.20684800 | -2.71961600 | C | 4.36176400  | -4.27083800 | 4.77549100  |
| C              | 0.93124500  | 0.21022500  | -4.09843500 | H | 5.20447700  | -3.86749100 | 4.20955600  |
| H              | 1.49851900  | -1.88409200 | -4.07859500 | H | 4.42334700  | -3.97290800 | 5.82147300  |
| H              | -0.11255800 | -1.61189500 | -4.74620500 | H | 4.35756100  | -5.35927000 | 4.68190600  |
| C              | 1.62535500  | 0.52409800  | -5.42654500 | C | -0.89280200 | -3.49238900 | -0.38111700 |
| H              | 0.00767600  | 0.79478900  | -4.01419400 | C | -1.41162400 | -1.19518700 | 0.17180100  |
| H              | 1.57102100  | 0.51457200  | -3.26042500 | H | -1.28170400 | -0.19557300 | -0.24151500 |
| H              | 1.85241600  | 1.59142600  | -5.50623600 | C | 1.83588400  | -1.77179500 | 2.37789900  |
| H              | 2.56816100  | -0.02642100 | -5.52292800 | H | 2.74216100  | -1.67571300 | 1.76632300  |
| H              | 0.99196400  | 0.25367800  | -6.27853300 | H | 2.06929700  | -1.31863100 | 3.34167600  |
| H              | -3.36299300 | -3.62679700 | -0.18671700 | S | 0.72683700  | 0.74984100  | 1.88075400  |
| H              | -3.64640400 | -2.24958400 | -1.27472700 | O | 0.39163900  | 1.35687600  | 0.57626900  |
| C              | -3.78855900 | -2.67728700 | -6.69471400 | O | 2.01904000  | 1.05901100  | 2.51956900  |
| C              | -4.95383200 | -2.95472300 | -7.63009300 | C | -0.58115300 | 1.23743100  | 3.02506400  |
| C              | -6.19947700 | -2.38848500 | -5.67315200 | C | -1.37214900 | 2.33510300  | 2.68033800  |
| C              | -5.35151700 | -3.45855100 | -5.00560900 | C | -0.72275800 | 0.59293300  | 4.25699900  |
| O              | -6.20091400 | -2.51733800 | -7.09376000 | C | -2.32702200 | 2.79486500  | 3.58935400  |
| O              | -3.96849000 | -3.38819500 | -5.44677400 | H | -1.23411500 | 2.80941200  | 1.71493500  |
| H              | -7.23873300 | -2.49147700 | -5.34383300 | C | -1.68932000 | 1.05653000  | 5.15057700  |
| H              | -5.84221300 | -1.39585200 | -5.36768600 | H | -0.11593800 | -0.27059000 | 4.50646800  |
| H              | -5.34810700 | -3.32842100 | -3.92152200 | C | -2.48605500 | 2.15625900  | 4.82090000  |
| H              | -5.72855700 | -4.45957600 | -5.24786800 | H | -2.94635500 | 3.64930700  | 3.33304900  |
| H              | -4.79285100 | -2.42694700 | -8.57756700 | H | -1.81658500 | 0.55749400  | 6.10660000  |
| H              | -4.99725300 | -4.03273900 | -7.84991400 | H | -3.23252700 | 2.51428900  | 5.52410600  |
| H              | -2.85131700 | -3.04499200 | -7.11970200 | C | -2.86446100 | -1.38809700 | 0.80467400  |
| H              | -3.68777800 | -1.60706800 | -6.48513900 | C | -3.21927500 | -2.36289800 | -0.36078500 |
| C              | -1.63585500 | -4.57939100 | -4.05224800 | C | -2.91512800 | -2.03835900 | 2.18931200  |
| O              | -1.11406800 | -5.60382900 | -4.22007000 | H | -2.37880500 | -2.99119800 | 2.21370100  |
| <b>INT-5dd</b> |             |             |             | H | -2.48574600 | -1.38648400 | 2.95605900  |
| C              | -0.19478400 | -1.67764000 | 0.90777100  | H | -3.95845000 | -2.23878500 | 2.46169500  |
| C              | -0.03249700 | -3.09790100 | 0.59110800  | C | -3.68569600 | -0.09658400 | 0.78936500  |
| Rh             | -2.40622500 | -2.77959900 | -4.07481500 | H | -4.73479400 | -0.31027500 | 1.02718300  |
| Cl             | -3.53369000 | -0.67575700 | -4.45517800 | H | -3.31195300 | 0.62051400  | 1.52697100  |
| C              | 1.03980400  | -3.91692600 | 1.25346600  | H | -3.65934000 | 0.38315700  | -0.19477300 |

|                       |             |             |             |   |             |             |             |
|-----------------------|-------------|-------------|-------------|---|-------------|-------------|-------------|
| C                     | -1.04069600 | -4.90238800 | -0.86920800 | H | -1.85745900 | -4.75002100 | 4.51211200  |
| H                     | -0.78555800 | -5.62208700 | -0.08487300 | C | 0.40965000  | -3.55724600 | 3.78545900  |
| H                     | -2.06548200 | -5.10303800 | -1.19545300 | C | 1.51971400  | -3.23129800 | 2.77252000  |
| H                     | -0.38466200 | -5.11883700 | -1.71920500 | O | -0.09874300 | -2.77910500 | 4.56239400  |
| C                     | -1.74455200 | -2.33161600 | -0.87334400 | C | 2.80811800  | -3.92984000 | 3.24618700  |
| C                     | -1.55138300 | -1.80680200 | -2.28032300 | O | 3.59745400  | -4.49720500 | 2.52528900  |
| C                     | -0.50592800 | -2.05926100 | -3.17744800 | O | 2.97347900  | -3.78656900 | 4.57514600  |
| C                     | 0.10754200  | -0.99953900 | -4.06525700 | C | 4.18182100  | -4.35204100 | 5.11694100  |
| H                     | 0.15553600  | -2.89583800 | -2.95057000 | H | 5.05780500  | -3.88779300 | 4.65835000  |
| H                     | -2.04069700 | -0.84286500 | -2.40307800 | H | 4.14967100  | -4.14062700 | 6.18513600  |
| C                     | 1.31321000  | -0.32938000 | -3.36846700 | H | 4.21337600  | -5.42902400 | 4.93600800  |
| H                     | 0.44461300  | -1.45105500 | -5.00700000 | C | -0.68306800 | -3.23425900 | -0.34978900 |
| H                     | -0.64393500 | -0.24606000 | -4.31933000 | C | -1.23927700 | -0.96696100 | 0.28599600  |
| C                     | 1.96937200  | 0.74061300  | -4.24687500 | H | -1.05933700 | 0.04636000  | -0.07032800 |
| H                     | 0.98460700  | 0.11946500  | -2.42295400 | C | 1.78926400  | -1.70463400 | 2.75486100  |
| H                     | 2.05492700  | -1.09572600 | -3.10560100 | H | 2.75183900  | -1.52491300 | 2.25975000  |
| H                     | 2.81838800  | 1.20347500  | -3.73419500 | H | 1.90502400  | -1.34670400 | 3.77826200  |
| H                     | 2.33676400  | 0.31413800  | -5.18747700 | S | 0.68197600  | 0.83307900  | 2.37527600  |
| H                     | 1.25798800  | 1.53508200  | -4.49728100 | O | 0.36033600  | 1.56188600  | 1.13266000  |
| H                     | -3.58462200 | -3.35089000 | -0.06209400 | O | 1.94860700  | 1.10984300  | 3.07810000  |
| H                     | -3.92146300 | -1.93712300 | -1.08309900 | C | -0.66458100 | 1.18130900  | 3.52923600  |
| C                     | -3.64111100 | -3.13938300 | -6.94807600 | C | -1.45715200 | 2.30326100  | 3.27748700  |
| C                     | -4.67964200 | -3.75482300 | -7.87142500 | C | -0.83936600 | 0.41006600  | 4.68131500  |
| C                     | -6.13250700 | -2.87529400 | -6.19181800 | C | -2.44358700 | 2.65930400  | 4.19904200  |
| C                     | -5.26387600 | -3.62219400 | -5.19315600 | H | -1.29405000 | 2.87773800  | 2.37221200  |
| O                     | -6.01553700 | -3.40949300 | -7.50659900 | C | -1.83679500 | 0.77152200  | 5.58835100  |
| O                     | -3.85917900 | -3.59362500 | -5.58864800 | H | -0.23870000 | -0.47538600 | 4.85636900  |
| H                     | -7.18270700 | -2.98063900 | -5.90165500 | C | -2.63332900 | 1.89493100  | 5.35204300  |
| H                     | -5.87896400 | -1.80750300 | -6.16772100 | H | -3.06320500 | 3.53185100  | 4.01398400  |
| H                     | -5.33591800 | -3.15935300 | -4.20735100 | H | -1.98904000 | 0.17255700  | 6.48126600  |
| H                     | -5.55731700 | -4.67631400 | -5.13112800 | H | -3.40396400 | 2.17244900  | 6.06554100  |
| H                     | -4.50123300 | -3.40526100 | -8.89609400 | C | -2.73210500 | -1.16600400 | 0.81250600  |
| H                     | -4.57042600 | -4.84968100 | -7.86567800 | C | -3.00812900 | -2.11204500 | -0.39637200 |
| H                     | -2.63704200 | -3.47527300 | -7.21830400 | C | -2.88934100 | -1.85290400 | 2.17093000  |
| H                     | -3.66712600 | -2.04555800 | -6.97004600 | H | -2.35153300 | -2.80444800 | 2.20953900  |
| C                     | -1.69263000 | -4.48218100 | -4.00692500 | H | -2.52510400 | -1.22463000 | 2.98868400  |
| O                     | -1.28420600 | -5.56004400 | -4.10748100 | H | -3.94997400 | -2.06418600 | 2.35451700  |
| <b>P1<sup>B</sup></b> |             |             |             | C | -3.54286900 | 0.13150600  | 0.77069400  |
| C                     | -0.08935500 | -1.50614300 | 1.09586900  | H | -4.60905500 | -0.07673600 | 0.92282800  |
| C                     | 0.11687200  | -2.90213700 | 0.69291500  | H | -3.21965600 | 0.82566000  | 1.55303100  |
| C                     | 1.17417600  | -3.74222200 | 1.35458700  | H | -3.43585000 | 0.63884100  | -0.19432300 |
| C                     | 0.69378400  | -0.93469300 | 2.03958400  | C | -0.79667600 | -4.57214000 | -1.01188000 |
| H                     | 0.88649700  | -4.79474300 | 1.40045900  | H | -0.18616300 | -5.33408500 | -0.52176100 |
| H                     | 2.10148200  | -3.70283000 | 0.77206400  | H | -1.83999500 | -4.91370100 | -1.00542600 |
| H                     | -0.57728900 | -5.11453200 | 5.69188100  | H | -0.49959600 | -4.51585600 | -2.06486600 |
| C                     | -0.92160800 | -5.29113400 | 4.67015500  | C | -1.50593700 | -2.04948500 | -0.82332000 |
| O                     | 0.07391200  | -4.86211200 | 3.72417900  | C | -1.24357600 | -1.62808800 | -2.24862400 |
| H                     | -1.05840100 | -6.35682100 | 4.48866600  | C | -0.11940100 | -1.82831300 | -2.94466100 |

|                         |             |             |             |    |             |             |             |
|-------------------------|-------------|-------------|-------------|----|-------------|-------------|-------------|
| C                       | 0.13584100  | -1.31539700 | -4.33525500 | O  | -3.43270900 | -6.20112100 | -6.86939300 |
| H                       | 0.70266700  | -2.37652900 | -2.48141600 | O  | -1.90445600 | -6.97925300 | -5.40486000 |
| H                       | -2.04948200 | -1.06005600 | -2.71677900 | C  | -0.47904300 | -4.58039700 | -6.48671500 |
| C                       | 1.32394700  | -0.33603100 | -4.40566000 | O  | 0.45939200  | -3.93429800 | -6.06732000 |
| H                       | 0.34327100  | -2.16161400 | -5.00811200 | O  | -0.45189900 | -5.28007500 | -7.63105600 |
| H                       | -0.76751700 | -0.82588200 | -4.72162400 | C  | -2.48215300 | -8.29556300 | -5.54232900 |
| C                       | 1.60854100  | 0.15372600  | -5.82863800 | H  | -2.45263700 | -8.61398100 | -6.58679400 |
| H                       | 1.12034000  | 0.51850100  | -3.74895800 | H  | -1.86689600 | -8.94709000 | -4.92241900 |
| H                       | 2.21878000  | -0.82558300 | -3.99882000 | H  | -3.51409900 | -8.27795100 | -5.18653100 |
| H                       | 2.45737600  | 0.84476000  | -5.84937900 | C  | 0.77899000  | -5.21624100 | -8.37779300 |
| H                       | 1.84305800  | -0.68266000 | -6.49735000 | H  | 0.61453800  | -5.83163400 | -9.26123400 |
| H                       | 0.74268900  | 0.67872000  | -6.24823500 | H  | 0.99741500  | -4.18419700 | -8.66121200 |
| H                       | -3.38487600 | -3.10841700 | -0.14215200 | H  | 1.60623000  | -5.60756000 | -7.78149400 |
| H                       | -3.67877900 | -1.67507400 | -1.14368500 | S  | -2.86700900 | -0.69735100 | -6.13001800 |
| <b>TS1b<sup>H</sup></b> |             |             |             | O  | -2.33730100 | -0.79212000 | -7.50229900 |
| C                       | -1.86394600 | -4.63643400 | -5.82240700 | O  | -4.08446600 | 0.08951000  | -5.85088000 |
| C                       | -2.73611500 | -3.51612300 | -6.49732200 | C  | -1.56026400 | -0.05459600 | -5.06907100 |
| H                       | -2.21631100 | -3.08451500 | -7.35411300 | C  | -0.27995500 | -0.61225000 | -5.13871200 |
| H                       | -3.63302800 | -4.00228900 | -6.88677000 | C  | -1.84901300 | 1.01390700  | -4.21959300 |
| C                       | -1.65663600 | -4.41652800 | -4.30297400 | C  | 0.72306500  | -0.09237100 | -4.32095600 |
| H                       | -1.08526200 | -5.25550400 | -3.89779500 | H  | -0.06487300 | -1.43945800 | -5.80718200 |
| H                       | -1.05056700 | -3.51354100 | -4.18361300 | C  | -0.83194700 | 1.52997200  | -3.41385500 |
| C                       | -3.16138700 | -2.40344600 | -5.57749300 | H  | -2.84976200 | 1.43152000  | -4.20811400 |
| C                       | -3.80904300 | -2.55571200 | -4.42214400 | C  | 0.44851700  | 0.97560300  | -3.46173800 |
| C                       | -4.64176000 | -1.94300100 | -3.48068800 | H  | 1.71982000  | -0.52083400 | -4.35981600 |
| H                       | -5.44530600 | -1.35524700 | -3.92309400 | H  | -1.04155100 | 2.36473400  | -2.75184200 |
| C                       | -4.19189800 | -1.45101100 | -2.11951400 | H  | 1.23586300  | 1.37742800  | -2.83069800 |
| C                       | -5.34691000 | -1.28488900 | -1.11035600 | Rh | -5.10104200 | -4.09714300 | -3.74963500 |
| H                       | -6.12965900 | -0.65346800 | -1.55378100 | Cl | -5.48238400 | -6.54218900 | -3.79020700 |
| H                       | -5.81232100 | -2.26170500 | -0.92818900 | C  | -6.88166900 | -3.95946400 | -2.90631600 |
| C                       | -4.90809300 | -0.70466500 | 0.15940700  | O  | -7.87633500 | -3.86880600 | -2.34507100 |
| C                       | -4.52804300 | -0.23235200 | 1.20709500  | C  | -3.57723200 | -5.05290100 | -1.07633800 |
| C                       | -4.08938700 | 0.36859100  | 2.46813300  | H  | -4.17745000 | -5.96690900 | -1.03538000 |
| C                       | -4.22955200 | 1.90525900  | 2.49664300  | H  | -2.55842400 | -5.27536600 | -0.73824000 |
| H                       | -3.04168400 | 0.09629700  | 2.65796800  | H  | -4.01786400 | -4.32639200 | -0.38434400 |
| H                       | -4.66649000 | -0.06357200 | 3.29753000  | C  | -6.62146500 | -4.89866500 | -8.18175500 |
| C                       | -3.76876300 | 2.51769500  | 3.82422200  | C  | -6.68235800 | -5.02869500 | -6.66793900 |
| H                       | -3.64959200 | 2.33157800  | 1.66844900  | C  | -6.72662500 | -2.65701300 | -6.50191900 |
| H                       | -5.27710100 | 2.17086100  | 2.30746000  | C  | -6.67158600 | -2.56875600 | -8.02318700 |
| C                       | -3.90318000 | 4.04328300  | 3.85862100  | O  | -6.08608600 | -3.86406900 | -6.05322100 |
| H                       | -4.35050800 | 2.07959100  | 4.64674000  | O  | -7.26945400 | -3.70821000 | -8.62272500 |
| H                       | -2.72265100 | 2.23741900  | 4.00949900  | H  | -6.18719700 | -1.81930500 | -6.05428400 |
| H                       | -3.56729100 | 4.45224600  | 4.81697800  | H  | -7.77223600 | -2.65142300 | -6.15949600 |
| H                       | -3.30495800 | 4.51184800  | 3.06890900  | H  | -7.22586500 | -1.69140100 | -8.37057000 |
| H                       | -4.94401900 | 4.35288100  | 3.71131900  | H  | -5.62270300 | -2.46743300 | -8.34601800 |
| C                       | -2.92343500 | -4.28376500 | -3.54000400 | H  | -7.72549500 | -5.11274200 | -6.33144700 |
| C                       | -3.56173100 | -4.53745000 | -2.45791400 | H  | -6.11496100 | -5.88704600 | -6.30952900 |
| C                       | -2.51165200 | -6.01112400 | -6.10658200 | H  | -5.57071900 | -4.91043600 | -8.51005000 |



|                           |             |             |             |                              |             |             |             |
|---------------------------|-------------|-------------|-------------|------------------------------|-------------|-------------|-------------|
| H                         | -7.14287400 | -5.73756000 | -8.65275200 | H                            | 2.47671800  | -4.78843300 | -7.36322200 |
| H                         | -3.42278800 | -2.10564500 | -1.70520000 | H                            | 1.92909100  | -6.47998700 | -7.41855800 |
| H                         | -3.71611400 | -0.47179200 | -2.26658000 | S                            | -2.78806400 | -0.77550000 | -5.76861500 |
| <b>INT-2b<sup>H</sup></b> |             |             |             | O                            | -2.40537900 | -0.76163600 | -7.19090600 |
| C                         | -1.14303100 | -4.59311700 | -5.51922600 | O                            | -4.13460300 | -0.32414200 | -5.36045200 |
| C                         | -1.29568000 | -3.09404400 | -5.86038100 | C                            | -1.59836800 | 0.25816000  | -4.89279700 |
| H                         | -0.36655200 | -2.57562100 | -5.58558100 | C                            | -0.32074500 | 0.42855600  | -5.43206400 |
| H                         | -1.42004100 | -2.97737400 | -6.93887200 | C                            | -1.97575300 | 0.88597600  | -3.70334400 |
| C                         | -1.35273300 | -4.80613800 | -3.99858300 | C                            | 0.60124200  | 1.22372700  | -4.74997900 |
| H                         | -1.17595700 | -5.84935100 | -3.73943400 | H                            | -0.07086400 | -0.03169500 | -6.38187900 |
| H                         | -0.60972000 | -4.19989600 | -3.46739300 | C                            | -1.04636100 | 1.68086600  | -3.03271100 |
| C                         | -2.47107500 | -2.44170900 | -5.15723100 | H                            | -2.98746100 | 0.77239100  | -3.33042400 |
| C                         | -3.19227400 | -3.04431100 | -4.17283400 | C                            | 0.24107400  | 1.84340900  | -3.55115500 |
| C                         | -4.46232400 | -2.58128200 | -3.50766500 | H                            | 1.59622800  | 1.36705100  | -5.16042000 |
| H                         | -5.01857500 | -1.87138400 | -4.11373800 | H                            | -1.33064200 | 2.17845200  | -2.11052900 |
| C                         | -4.25141200 | -1.99973300 | -2.10509700 | H                            | 0.96123100  | 2.46349800  | -3.02551200 |
| C                         | -5.47678400 | -1.21889900 | -1.58453900 | Rh                           | -5.42407300 | -4.45441000 | -3.76426300 |
| H                         | -5.73357200 | -0.44176000 | -2.31731400 | Cl                           | -6.16964100 | -6.71750100 | -4.48020000 |
| H                         | -6.35287900 | -1.87654900 | -1.52734500 | C                            | -6.29713600 | -4.43439600 | -2.17340400 |
| C                         | -5.24407300 | -0.60422100 | -0.27682300 | O                            | -6.84525200 | -4.50389000 | -1.16316600 |
| C                         | -5.03741600 | -0.10333200 | 0.80563500  | C                            | -3.54048800 | -6.37752100 | -2.25831200 |
| C                         | -4.79302700 | 0.53587500  | 2.10003400  | H                            | -4.12215000 | -7.19259900 | -2.69839500 |
| C                         | -4.21987500 | 1.96347500  | 1.97821700  | H                            | -2.48859800 | -6.67077300 | -2.17464800 |
| H                         | -4.10328900 | -0.08294100 | 2.69086800  | H                            | -3.92139500 | -6.22003000 | -1.24135400 |
| H                         | -5.73081600 | 0.56911500  | 2.67209000  | C                            | -8.01524900 | -4.89093000 | -7.11250600 |
| C                         | -3.97818700 | 2.62625800  | 3.33918600  | C                            | -8.16813900 | -4.28989100 | -5.72164000 |
| H                         | -3.28029800 | 1.92203700  | 1.41244000  | C                            | -6.64830400 | -2.56979900 | -6.33512200 |
| H                         | -4.91041600 | 2.57476500  | 1.38389000  | C                            | -6.50276900 | -3.21046500 | -7.70760700 |
| C                         | -3.40588400 | 4.04233500  | 3.22181000  | O                            | -6.96300200 | -3.58102800 | -5.34621500 |
| H                         | -4.92247600 | 2.65822100  | 3.89966400  | O                            | -7.70032600 | -3.88748000 | -8.07215500 |
| H                         | -3.29485900 | 2.00198600  | 3.93111800  | H                            | -5.72970500 | -2.07239200 | -6.02534800 |
| H                         | -3.24504200 | 4.49134000  | 4.20720700  | H                            | -7.46434000 | -1.83450700 | -6.34203600 |
| H                         | -2.44365500 | 4.03869100  | 2.69699900  | H                            | -6.32626600 | -2.43837900 | -8.46257300 |
| H                         | -4.08344300 | 4.69835600  | 2.66367700  | H                            | -5.64664500 | -3.90273500 | -7.70660800 |
| C                         | -2.75430800 | -4.36442700 | -3.66404500 | H                            | -8.99973100 | -3.57187600 | -5.70007600 |
| C                         | -3.69677800 | -5.13226700 | -3.05853900 | H                            | -8.32022900 | -5.06959800 | -4.97567100 |
| C                         | -2.19193600 | -5.41425600 | -6.29637000 | H                            | -7.23538100 | -5.66477500 | -7.08537000 |
| O                         | -3.07148600 | -4.94483900 | -6.98441200 | H                            | -8.95837800 | -5.34908100 | -7.42692800 |
| O                         | -2.02126000 | -6.72644300 | -6.07267600 | H                            | -3.95560400 | -2.77001600 | -1.38554200 |
| C                         | 0.26457400  | -5.05461100 | -5.91286000 | H                            | -3.40910800 | -1.29607000 | -2.14858100 |
| O                         | 1.14585200  | -5.34185500 | -5.13417300 | <b>Z-TS2bb<sup>III</sup></b> |             |             |             |
| O                         | 0.40767200  | -5.05914900 | -7.25175400 | C                            | 4.26267300  | -2.04197500 | -2.13163200 |
| C                         | -3.00037200 | -7.60070600 | -6.68170100 | C                            | 4.35448400  | -0.58401100 | -2.61907800 |
| H                         | -3.05198300 | -7.41607100 | -7.75658100 | H                            | 5.38395800  | -0.22103500 | -2.50047500 |
| H                         | -2.64755100 | -8.61144000 | -6.47926600 | H                            | 4.09842900  | -0.53225400 | -3.68122700 |
| H                         | -3.98042100 | -7.43450500 | -6.22795100 | C                            | 4.22103000  | -2.03588800 | -0.59091400 |
| C                         | 1.70166600  | -5.46059800 | -7.73891200 | H                            | 4.31878100  | -3.05442500 | -0.23093300 |
| H                         | 1.63565100  | -5.40360000 | -8.82475800 | H                            | 5.11308100  | -1.49966800 | -0.24209800 |

|   |             |             |             |                             |             |             |             |
|---|-------------|-------------|-------------|-----------------------------|-------------|-------------|-------------|
| C | 3.39184100  | 0.27078800  | -1.84043500 | H                           | 4.75858800  | 2.61623500  | -0.35521300 |
| C | 2.67834200  | -0.08174200 | -0.72877400 | C                           | 6.81042400  | 4.36241100  | -2.43732400 |
| C | 1.55293400  | 0.80347500  | -0.31790400 | H                           | 6.55119700  | 4.55139500  | -4.57003700 |
| H | 0.63303500  | 0.64180800  | -0.87460700 | H                           | 6.81775100  | 4.00241800  | -0.30885600 |
| C | 1.39956100  | 1.35111600  | 0.97328500  | H                           | 7.71211900  | 4.96714000  | -2.41494800 |
| C | 2.62388600  | 1.81415800  | 1.76632700  | Rh                          | 0.52779000  | -1.40640000 | 1.85235900  |
| H | 3.39422100  | 1.03372700  | 1.72866400  | Cl                          | -0.71003800 | -1.77147700 | -0.20522300 |
| H | 3.03836900  | 2.69586100  | 1.25828500  | C                           | 1.42813600  | -1.34841300 | 3.48061400  |
| C | 2.33432000  | 2.16071600  | 3.15890300  | O                           | 1.97114600  | -1.36358900 | 4.50259200  |
| C | 2.13701200  | 2.47916000  | 4.31015000  | C                           | 2.63726400  | -3.36498700 | 1.41204900  |
| C | 1.93636100  | 2.84923000  | 5.71297000  | H                           | 1.88866900  | -3.80190600 | 2.07385600  |
| C | 1.24802700  | 1.75554000  | 6.55647400  | H                           | 2.76984200  | -4.05261100 | 0.56957000  |
| H | 1.35035100  | 3.77710200  | 5.76944500  | H                           | 3.58492000  | -3.32859400 | 1.96701300  |
| H | 2.91309900  | 3.08421200  | 6.15868000  | C                           | -3.94490300 | -0.97268700 | 2.71176200  |
| C | 1.12563300  | 2.14111600  | 8.03512700  | C                           | -2.63620800 | -1.74662700 | 2.67303000  |
| H | 0.24993400  | 1.56135600  | 6.14286000  | C                           | -1.62736600 | -0.03554800 | 3.98564800  |
| H | 1.80924800  | 0.81925200  | 6.45629200  | C                           | -2.95700700 | 0.70889600  | 4.00014200  |
| C | 0.43246100  | 1.06613900  | 8.87809000  | O                           | -1.52969100 | -0.82760200 | 2.79166200  |
| H | 2.12754700  | 2.33543300  | 8.44162300  | O                           | -4.04634900 | -0.19680600 | 3.90341600  |
| H | 0.57434900  | 3.08768700  | 8.12059900  | H                           | -0.78194500 | 0.65640700  | 3.97060200  |
| H | 0.36386600  | 1.36556300  | 9.92882400  | H                           | -1.54751100 | -0.68879900 | 4.86710800  |
| H | -0.58584600 | 0.87624900  | 8.51997000  | H                           | -3.07665100 | 1.25659900  | 4.94041200  |
| H | 0.97902900  | 0.11743800  | 8.83642000  | H                           | -2.98185900 | 1.43013600  | 3.16681000  |
| C | 2.95780100  | -1.36651600 | -0.05016500 | H                           | -2.59091600 | -2.46745500 | 3.50230500  |
| C | 2.21994700  | -1.98239900 | 0.92881200  | H                           | -2.49760000 | -2.25699200 | 1.71882500  |
| C | 2.98885500  | -2.69002800 | -2.71352400 | H                           | -4.01306400 | -0.32260000 | 1.82553100  |
| O | 2.28208600  | -2.19198600 | -3.55755200 | H                           | -4.79477100 | -1.66172600 | 2.70814800  |
| O | 2.76589900  | -3.89199100 | -2.14989900 | H                           | 0.99995600  | 0.28517300  | 1.49502700  |
| C | 5.49140600  | -2.82082300 | -2.61624500 | H                           | 0.53160500  | 2.00343300  | 1.07400200  |
| O | 6.39172900  | -3.21380500 | -1.90831300 | <b>E-TS2bb<sup>BH</sup></b> |             |             |             |
| O | 5.46047900  | -2.98533800 | -3.95358700 | C                           | 4.21325200  | -2.03837900 | -2.33802200 |
| C | 1.52910100  | -4.53027300 | -2.53883600 | C                           | 4.34852500  | -0.55568200 | -2.73216700 |
| H | 1.47666600  | -4.62631400 | -3.62519000 | H                           | 5.38373800  | -0.22709300 | -2.56931400 |
| H | 1.54693800  | -5.51048000 | -2.06311000 | H                           | 4.11629800  | -0.43240200 | -3.79361600 |
| H | 0.68267100  | -3.94043200 | -2.17855400 | C                           | 4.16198200  | -2.13053300 | -0.80117900 |
| C | 6.57784700  | -3.69401000 | -4.51930300 | H                           | 4.21674400  | -3.17423900 | -0.50987000 |
| H | 6.38467800  | -3.73675400 | -5.59064200 | H                           | 5.07293200  | -1.65536600 | -0.41487100 |
| H | 7.51093900  | -3.16295100 | -4.31603400 | C                           | 3.38628800  | 0.26823700  | -1.92129300 |
| H | 6.64381000  | -4.70010500 | -4.09851200 | C                           | 2.66700000  | -0.13268100 | -0.83017500 |
| S | 3.00043100  | 1.84065500  | -2.55310100 | C                           | 1.55619700  | 0.74859100  | -0.38153300 |
| O | 2.60958600  | 1.73475100  | -3.96563700 | H                           | 0.61738400  | 0.60575700  | -0.91197200 |
| O | 2.03970400  | 2.43525100  | -1.55727400 | C                           | 1.47675500  | 1.27684800  | 0.92415200  |
| C | 4.51116200  | 2.81678300  | -2.49286800 | C                           | 0.39239200  | 2.32273700  | 1.21246000  |
| C | 5.00214300  | 3.34910900  | -3.68570500 | H                           | 0.58307200  | 3.20015000  | 0.58108900  |
| C | 5.15138700  | 3.04408900  | -1.27098700 | H                           | -0.58100000 | 1.92209800  | 0.90289900  |
| C | 6.15951200  | 4.12897000  | -3.64986400 | C                           | 0.35252500  | 2.73391300  | 2.61714500  |
| H | 4.47739900  | 3.15136000  | -4.61374700 | C                           | 0.34268400  | 3.10013800  | 3.77152700  |
| C | 6.30881600  | 3.81983500  | -1.25023900 | C                           | 0.35341600  | 3.57450900  | 5.15760300  |

|    |             |             |             |                              |             |             |             |
|----|-------------|-------------|-------------|------------------------------|-------------|-------------|-------------|
| C  | 1.61000800  | 4.39749600  | 5.51220400  | H                            | 2.66922200  | -4.14679300 | 0.31064200  |
| H  | 0.27838300  | 2.71806000  | 5.84225200  | H                            | 3.55139800  | -3.51123100 | 1.71065800  |
| H  | -0.54259800 | 4.18441300  | 5.33847300  | C                            | -3.78130400 | -1.24550600 | 3.13906700  |
| C  | 1.60425700  | 4.89079600  | 6.96366100  | C                            | -2.45396500 | -1.93977700 | 2.87513700  |
| H  | 2.50057700  | 3.78270300  | 5.33130800  | C                            | -1.37295100 | -0.31479500 | 4.23930100  |
| H  | 1.67984600  | 5.25245300  | 4.82817800  | C                            | -2.72345500 | 0.34737900  | 4.48120200  |
| C  | 2.84872000  | 5.70944500  | 7.32127200  | O                            | -1.38007700 | -0.97925300 | 2.96414100  |
| H  | 0.70439400  | 5.49657600  | 7.13727500  | O                            | -3.77911300 | -0.60062300 | 4.40942400  |
| H  | 1.52566900  | 4.02851700  | 7.63973800  | H                            | -0.57628200 | 0.43040800  | 4.19455200  |
| H  | 2.81716500  | 6.04955300  | 8.36129200  | H                            | -1.15735600 | -1.04738500 | 5.03093900  |
| H  | 3.76235000  | 5.11823200  | 7.19214000  | H                            | -2.75590100 | 0.78812700  | 5.48273200  |
| H  | 2.93592600  | 6.59632700  | 6.68351400  | H                            | -2.87328600 | 1.14857300  | 3.73965600  |
| C  | 2.92703300  | -1.44844700 | -0.21218800 | H                            | -2.28315900 | -2.73504400 | 3.61533700  |
| C  | 2.20644600  | -2.07393500 | 0.77359100  | H                            | -2.40541400 | -2.34766700 | 1.86439100  |
| C  | 2.92597700  | -2.61431300 | -2.96236300 | H                            | -3.97836400 | -0.51419900 | 2.33936300  |
| O  | 2.22437200  | -2.04107600 | -3.76200300 | H                            | -4.59558500 | -1.97627600 | 3.15427700  |
| O  | 2.68044900  | -3.85064800 | -2.48829200 | H                            | 2.43245700  | 1.46742700  | 1.41657600  |
| C  | 5.42351600  | -2.81874700 | -2.86513400 | H                            | 1.11252700  | 0.21074500  | 1.45504600  |
| O  | 6.31344300  | -3.27157600 | -2.18041600 | <b>E-INT-2b<sup>PH</sup></b> |             |             |             |
| O  | 5.39029800  | -2.90829400 | -4.20973600 | C                            | 2.92117700  | -2.03551100 | -1.87574100 |
| C  | 1.43513000  | -4.43741600 | -2.92409600 | C                            | 2.73317100  | -0.54003500 | -2.22182600 |
| H  | 1.38634600  | -4.46057100 | -4.01467900 | H                            | 3.63662300  | 0.01031900  | -1.92983100 |
| H  | 1.43052900  | -5.44689700 | -2.51393100 | H                            | 2.62115100  | -0.44143800 | -3.30513500 |
| H  | 0.59661100  | -3.85732800 | -2.53129600 | C                            | 2.67842500  | -2.26350700 | -0.36707100 |
| C  | 6.49053200  | -3.61283100 | -4.81313100 | H                            | 2.87018200  | -3.30630000 | -0.12285200 |
| H  | 6.29512600  | -3.59731400 | -5.88480000 | H                            | 3.41600400  | -1.66473700 | 0.18074000  |
| H  | 7.43574700  | -3.11390800 | -4.58574300 | C                            | 1.51622600  | 0.05616900  | -1.54467900 |
| H  | 6.53430900  | -4.63991700 | -4.44332100 | C                            | 0.79348400  | -0.57854800 | -0.58695400 |
| S  | 3.03121100  | 1.88245700  | -2.54725400 | C                            | -0.49595100 | -0.12767900 | 0.00867700  |
| O  | 2.79223600  | 1.87028600  | -3.99629900 | H                            | -1.15070900 | 0.44545100  | -0.63733100 |
| O  | 1.97099000  | 2.39265700  | -1.60595800 | C                            | -0.45820000 | 0.32529100  | 1.43168600  |
| C  | 4.49685800  | 2.88064900  | -2.25338500 | C                            | -1.26123300 | 1.60247800  | 1.74088700  |
| C  | 5.34829500  | 3.15174500  | -3.32629100 | H                            | -0.72079800 | 2.43953800  | 1.28310200  |
| C  | 4.76211600  | 3.35738800  | -0.96675300 | H                            | -2.22236400 | 1.54050400  | 1.21996900  |
| C  | 6.49650000  | 3.91194900  | -3.09835700 | C                            | -1.47509300 | 1.83099000  | 3.17013700  |
| H  | 5.09755900  | 2.78629300  | -4.31599300 | C                            | -1.65982800 | 1.99100500  | 4.35674600  |
| C  | 5.91170400  | 4.11569400  | -0.75390800 | C                            | -1.85669000 | 2.23080400  | 5.78812300  |
| H  | 4.07192400  | 3.15154500  | -0.15575800 | C                            | -0.90407100 | 3.29819100  | 6.36748800  |
| C  | 6.77800600  | 4.38931400  | -1.81680300 | H                            | -1.72310800 | 1.28903400  | 6.33823700  |
| H  | 7.16641200  | 4.13457700  | -3.92312900 | H                            | -2.89656000 | 2.53827400  | 5.96655100  |
| H  | 6.12874400  | 4.49777900  | 0.23881300  | C                            | -1.12791400 | 3.53689300  | 7.86520000  |
| H  | 7.67198600  | 4.98140600  | -1.64508100 | H                            | 0.13222300  | 2.98454100  | 6.19038400  |
| Rh | 0.59880100  | -1.48235000 | 1.83054200  | H                            | -1.04164300 | 4.23596400  | 5.81518100  |
| Cl | -0.78931300 | -1.68636200 | -0.15241000 | C                            | -0.18478700 | 4.59289200  | 8.44996000  |
| C  | 1.63885800  | -1.43394800 | 3.37210700  | H                            | -2.16975900 | 3.84303300  | 8.03183700  |
| O  | 2.28205900  | -1.40170000 | 4.33425200  | H                            | -0.99928200 | 2.58967200  | 8.40668700  |
| C  | 2.58725000  | -3.49013600 | 1.18394200  | H                            | -0.36747700 | 4.74261300  | 9.51884400  |
| H  | 1.84314400  | -3.92693200 | 1.85136100  | H                            | 0.86369400  | 4.29783400  | 8.32953200  |

|    |             |             |             |                              |             |             |             |
|----|-------------|-------------|-------------|------------------------------|-------------|-------------|-------------|
| H  | -0.31507200 | 5.55991600  | 7.95132100  | H                            | -4.77102000 | 1.65719200  | 1.89024400  |
| C  | 1.26813400  | -1.84533400 | -0.01799000 | H                            | -4.98626600 | -1.69694700 | -0.15068400 |
| C  | 0.40312000  | -2.54237300 | 0.75687800  | H                            | -3.80298900 | -0.82104800 | -1.14538000 |
| C  | 1.95118800  | -2.87977700 | -2.73102400 | H                            | -4.87054900 | 1.35133900  | -0.54002800 |
| O  | 1.30825400  | -2.46638100 | -3.66585900 | H                            | -6.13396400 | 0.25679100  | -1.15946500 |
| O  | 1.93318900  | -4.15767200 | -2.30425500 | H                            | 0.55255300  | 0.34970100  | 1.84936900  |
| C  | 4.35933200  | -2.44750400 | -2.22120700 | H                            | -0.92194200 | -0.50365900 | 2.15216600  |
| O  | 5.21792700  | -2.72430600 | -1.41303400 | <b>Z-INT-2b<sup>PH</sup></b> |             |             |             |
| O  | 4.56160700  | -2.43186900 | -3.55340000 | C                            | 3.81040700  | -1.61879400 | -1.08259300 |
| C  | 0.99986000  | -5.01735300 | -2.98951500 | C                            | 3.82163700  | -0.09040100 | -1.30554900 |
| H  | 1.19607700  | -5.01388700 | -4.06399400 | H                            | 4.66081600  | 0.35876100  | -0.76166700 |
| H  | 1.15824700  | -6.01110500 | -2.57073300 | H                            | 3.98911700  | 0.11236200  | -2.36660800 |
| H  | -0.02081300 | -4.67618200 | -2.80228700 | C                            | 3.25468500  | -1.93926400 | 0.32327400  |
| C  | 5.88752000  | -2.78586000 | -3.98452300 | H                            | 3.30409900  | -3.01264600 | 0.49602500  |
| H  | 5.86635600  | -2.72819500 | -5.07228300 | H                            | 3.92089300  | -1.46698000 | 1.05520700  |
| H  | 6.62254500  | -2.08844800 | -3.57524300 | C                            | 2.52887800  | 0.55519100  | -0.85631100 |
| H  | 6.13857600  | -3.79737500 | -3.65644900 | C                            | 1.59617200  | -0.05660500 | -0.08272300 |
| S  | 1.08169500  | 1.68870200  | -2.16128900 | C                            | 0.26746400  | 0.49368100  | 0.31532900  |
| O  | 0.82264200  | 1.60811200  | -3.60844600 | H                            | -0.21354800 | 1.14631200  | -0.40263200 |
| O  | 0.08924100  | 2.31361000  | -1.26098300 | C                            | 0.05582500  | 0.89057900  | 1.74199400  |
| C  | 2.61574300  | 2.62188600  | -1.95594200 | C                            | 1.28500000  | 1.18799800  | 2.62566400  |
| C  | 3.40399700  | 2.88955900  | -3.07575800 | H                            | 2.00208800  | 0.36418800  | 2.54939600  |
| C  | 2.97084400  | 3.08843300  | -0.68771400 | H                            | 1.77035100  | 2.07245000  | 2.19404400  |
| C  | 4.57664900  | 3.63091500  | -2.91746000 | C                            | 0.93321600  | 1.42019700  | 4.02558300  |
| H  | 3.08525300  | 2.53165100  | -4.04882500 | C                            | 0.62723600  | 1.60538400  | 5.18227900  |
| C  | 4.14634700  | 3.82330100  | -0.54010100 | C                            | 0.28144000  | 1.80984000  | 6.59004800  |
| H  | 2.32696100  | 2.89006200  | 0.16254500  | C                            | -0.02841700 | 0.49909400  | 7.34352900  |
| C  | 4.94854400  | 4.09215900  | -1.65316800 | H                            | -0.58294800 | 2.48460900  | 6.66190700  |
| H  | 5.19615200  | 3.85023300  | -3.78193700 | H                            | 1.10957100  | 2.32955900  | 7.09158500  |
| H  | 4.43287800  | 4.19286400  | 0.43998700  | C                            | -0.37718500 | 0.73143000  | 8.81812400  |
| H  | 5.86194300  | 4.66765900  | -1.53404200 | H                            | -0.85861500 | -0.01396300 | 6.84123300  |
| Rh | -1.45261000 | -1.75442600 | 0.89941100  | H                            | 0.83832600  | -0.16900100 | 7.26595200  |
| Cl | -1.98811200 | -2.96657100 | -1.09767600 | C                            | -0.69051400 | -0.56559600 | 9.57051400  |
| C  | -2.23927800 | -3.19263900 | 2.06154700  | H                            | 0.45744900  | 1.24879800  | 9.31047200  |
| O  | -2.69048000 | -4.02542600 | 2.70470100  | H                            | -1.23769600 | 1.41129400  | 8.88522900  |
| C  | 0.67377200  | -3.85983800 | 1.41638900  | H                            | -0.93447000 | -0.36933800 | 10.61947300 |
| H  | 0.01939500  | -4.63246800 | 0.99648000  | H                            | -1.54368400 | -1.08748300 | 9.12244400  |
| H  | 1.70997400  | -4.18435700 | 1.28052200  | H                            | 0.16365100  | -1.25174600 | 9.55017700  |
| H  | 0.47975100  | -3.81558400 | 2.49454900  | C                            | 1.84500700  | -1.40478400 | 0.44588000  |
| C  | -5.41959800 | 0.41560900  | -0.34640600 | C                            | 0.79086700  | -2.06685000 | 0.97806300  |
| C  | -4.44525800 | -0.74921100 | -0.26746100 | C                            | 2.95152900  | -2.28612800 | -2.17576300 |
| C  | -4.32586800 | -0.44520900 | 2.08932100  | O                            | 2.48313000  | -1.72254600 | -3.13780800 |
| C  | -5.31964000 | 0.70457400  | 1.97175700  | O                            | 2.79339600  | -3.59906000 | -1.92063100 |
| O  | -3.56829300 | -0.56743700 | 0.86969800  | C                            | 5.24626500  | -2.15053000 | -1.19174900 |
| O  | -6.17695200 | 0.52699600  | 0.85502600  | O                            | 5.90338400  | -2.57708900 | -0.26869300 |
| H  | -3.60585600 | -0.25734400 | 2.88975800  | O                            | 5.70226100  | -2.05088700 | -2.45593100 |
| H  | -4.85482600 | -1.38968500 | 2.28158600  | C                            | 1.94187400  | -4.30578800 | -2.84456200 |
| H  | -5.95488800 | 0.74656700  | 2.86197900  | H                            | 2.31482200  | -4.19875700 | -3.86561000 |

|                             |             |             |             |   |             |             |             |
|-----------------------------|-------------|-------------|-------------|---|-------------|-------------|-------------|
| H                           | 1.97270600  | -5.34873100 | -2.52973500 | H | 3.89365800  | 0.22871000  | -2.50157100 |
| H                           | 0.92402000  | -3.91316900 | -2.78501800 | C | 3.36342200  | -1.60869500 | 0.38441600  |
| C                           | 7.05671500  | -2.49015500 | -2.66403400 | H | 3.43704400  | -2.66351700 | 0.64010200  |
| H                           | 7.25354600  | -2.33847200 | -3.72479600 | H | 4.07123600  | -1.07364000 | 1.02913800  |
| H                           | 7.74686200  | -1.90084800 | -2.05567900 | C | 2.52980400  | 0.77521400  | -0.95219400 |
| H                           | 7.16120100  | -3.54483800 | -2.39851800 | C | 1.66193800  | 0.22207300  | -0.06563700 |
| S                           | 2.37348300  | 2.25959200  | -1.39527800 | C | 0.36394500  | 0.81644000  | 0.35978700  |
| O                           | 1.28564300  | 2.91915700  | -0.64313500 | H | -0.22726000 | 1.31025300  | -0.40019700 |
| O                           | 3.72517000  | 2.84907000  | -1.35458300 | C | 0.13015200  | 1.17950600  | 1.71584300  |
| C                           | 1.88955600  | 2.15434300  | -3.13009900 | C | 1.23497800  | 1.33199900  | 2.76023100  |
| C                           | 0.91887000  | 1.24189500  | -3.55016200 | H | 1.96011000  | 0.51999700  | 2.65692400  |
| C                           | 2.48197800  | 3.05324800  | -4.01931100 | H | 1.77102600  | 2.25845300  | 2.50767300  |
| C                           | 0.53171600  | 1.24307700  | -4.89040100 | C | 0.73791000  | 1.40106400  | 4.13381300  |
| H                           | 0.49111900  | 0.51958100  | -2.86224000 | C | 0.32059800  | 1.45852800  | 5.26885600  |
| C                           | 2.07804900  | 3.04924100  | -5.35447900 | C | -0.16078500 | 1.49907800  | 6.65087100  |
| H                           | 3.24975100  | 3.73097700  | -3.66208600 | C | -0.29723700 | 0.10265600  | 7.29445400  |
| C                           | 1.10394000  | 2.14713700  | -5.78832500 | H | -1.13152100 | 2.01268000  | 6.68651200  |
| H                           | -0.21084300 | 0.52841100  | -5.23150500 | H | 0.52469500  | 2.11136500  | 7.25305300  |
| H                           | 2.52995800  | 3.74457100  | -6.05567100 | C | -0.79932100 | 0.16574100  | 8.74147900  |
| H                           | 0.79754500  | 2.14135100  | -6.83045800 | H | -0.98199800 | -0.50397300 | 6.68829600  |
| Rh                          | -0.96673600 | -1.08154600 | 0.89598800  | H | 0.67582700  | -0.40240200 | 7.25872100  |
| Cl                          | -1.24667900 | -1.94624700 | -1.32654200 | C | -0.93754900 | -1.21666700 | 9.38702600  |
| C                           | -2.08740700 | -2.51640300 | 1.74398200  | H | -0.11188700 | 0.78175200  | 9.33712400  |
| O                           | -2.74228500 | -3.33996800 | 2.19587400  | H | -1.76902100 | 0.68161300  | 8.76689500  |
| C                           | 0.80625900  | -3.45944600 | 1.53000800  | H | -1.29816000 | -1.14095400 | 10.41778500 |
| H                           | 0.16384800  | -4.11167600 | 0.92703300  | H | -1.64416300 | -1.84430100 | 8.83240900  |
| H                           | 1.81194700  | -3.89089300 | 1.53775400  | H | 0.02392200  | -1.74173100 | 9.40859400  |
| H                           | 0.42735600  | -3.48531700 | 2.55825800  | C | 1.95808100  | -1.07670100 | 0.56061700  |
| C                           | -4.39240700 | 1.69978200  | -0.64007000 | C | 0.95822300  | -1.72077300 | 1.20987900  |
| C                           | -3.68258300 | 0.36308200  | -0.49120200 | C | 2.90255300  | -2.15318800 | -2.06628400 |
| C                           | -3.70399100 | 0.64923200  | 1.86651900  | O | 2.45230800  | -1.68385000 | -3.08373200 |
| C                           | -4.42096400 | 1.98183900  | 1.68151200  | O | 2.68257800  | -3.41498800 | -1.64990400 |
| O                           | -2.88657800 | 0.37312900  | 0.71560200  | C | 5.25476200  | -1.92576300 | -1.23136100 |
| O                           | -5.20435800 | 1.97303800  | 0.49841800  | O | 5.99560200  | -2.20270300 | -0.31338300 |
| H                           | -3.03548700 | 0.67485400  | 2.73121900  | O | 5.60613300  | -2.00418300 | -2.52835800 |
| H                           | -4.43469500 | -0.16209300 | 1.99731300  | C | 1.76048600  | -4.17192500 | -2.46226700 |
| H                           | -5.10209000 | 2.16720700  | 2.51780800  | H | 2.09880800  | -4.19572200 | -3.50039900 |
| H                           | -3.67770800 | 2.79538300  | 1.64595700  | H | 1.75266700  | -5.17471200 | -2.03499200 |
| H                           | -4.41205700 | -0.45571500 | -0.42769700 | H | 0.76817100  | -3.71810200 | -2.40777600 |
| H                           | -2.99466700 | 0.15689100  | -1.31151800 | C | 6.94763300  | -2.45567400 | -2.78519900 |
| H                           | -3.65106700 | 2.50246800  | -0.78179500 | H | 7.04921500  | -2.46640600 | -3.86980000 |
| H                           | -5.05821800 | 1.68151500  | -1.50785200 | H | 7.67371400  | -1.77309200 | -2.33684200 |
| H                           | -0.48087600 | 0.01057900  | 2.33408900  | H | 7.09971900  | -3.45587400 | -2.37259100 |
| H                           | -0.68506100 | 1.68816600  | 1.81380600  | S | 2.28024400  | 2.40726300  | -1.69076800 |
| <b>Z-TS2bb<sup>BH</sup></b> |             |             |             | O | 3.07008400  | 2.44239400  | -2.93171200 |
| C                           | 3.81966500  | -1.40260300 | -1.07561000 | O | 0.84882100  | 2.76189400  | -1.69849900 |
| C                           | 3.80170900  | 0.10256900  | -1.42184200 | C | 3.08759600  | 3.53406100  | -0.53153800 |
| H                           | 4.67324600  | 0.58664200  | -0.95881500 | C | 4.46924100  | 3.72324800  | -0.61310900 |

|                             |             |             |             |    |             |             |             |
|-----------------------------|-------------|-------------|-------------|----|-------------|-------------|-------------|
| C                           | 2.31715400  | 4.21662100  | 0.41274700  | H  | -2.30924000 | 1.46346600  | 1.18055700  |
| C                           | 5.09022000  | 4.58936800  | 0.28776600  | C  | -1.53518600 | 1.66658100  | 3.13860300  |
| H                           | 5.03749600  | 3.21997200  | -1.38800100 | C  | -1.68538800 | 1.73945200  | 4.33821800  |
| C                           | 2.94819400  | 5.08376200  | 1.30631600  | C  | -1.84401500 | 1.86796900  | 5.78843900  |
| H                           | 1.24027800  | 4.08710000  | 0.41632600  | C  | -1.02980100 | 3.03213100  | 6.39218000  |
| C                           | 4.33283100  | 5.26329800  | 1.24880800  | H  | -1.54635300 | 0.92700100  | 6.27115400  |
| H                           | 6.16327100  | 4.74606500  | 0.23180300  | H  | -2.90744900 | 2.00626500  | 6.02796000  |
| H                           | 2.35836100  | 5.62774700  | 2.03824600  | C  | -1.20557400 | 3.14844000  | 7.91063400  |
| H                           | 4.81996500  | 5.93974200  | 1.94493900  | H  | 0.03047600  | 2.88939200  | 6.14917600  |
| Rh                          | -0.84766300 | -0.81904500 | 1.12977100  | H  | -1.33438600 | 3.96846000  | 5.90841500  |
| Cl                          | -1.19528400 | -1.85393300 | -1.08417300 | C  | -0.40483000 | 4.30415600  | 8.51860200  |
| C                           | -1.84894800 | -2.28108300 | 1.94968400  | H  | -2.27137000 | 3.27814500  | 8.14340300  |
| O                           | -2.46077700 | -3.12371400 | 2.42483300  | H  | -0.90388100 | 2.20401300  | 8.38384500  |
| C                           | 1.06490400  | -3.05357000 | 1.88601500  | H  | -0.55032300 | 4.36281100  | 9.60192100  |
| H                           | 0.44664700  | -3.79234100 | 1.36258600  | H  | 0.66842900  | 4.18373000  | 8.33314500  |
| H                           | 2.09144400  | -3.43061700 | 1.90643400  | H  | -0.70846600 | 5.26557500  | 8.08943800  |
| H                           | 0.71033800  | -3.00123300 | 2.92167400  | C  | 1.32021800  | -1.74113400 | -0.02013800 |
| C                           | -4.38713700 | 1.73383300  | -0.51659400 | C  | 0.49984400  | -2.38190400 | 0.84636300  |
| C                           | -3.61219800 | 0.43943000  | -0.33003300 | C  | 1.90910400  | -3.03709400 | -2.65096800 |
| C                           | -3.66931500 | 0.78266600  | 2.02139500  | O  | 1.26299200  | -2.72815600 | -3.62299000 |
| C                           | -4.45319300 | 2.07096200  | 1.79754400  | O  | 1.88054600  | -4.25408700 | -2.07519300 |
| O                           | -2.82716800 | 0.52346400  | 0.88449500  | C  | 4.33059900  | -2.55036300 | -2.26969000 |
| O                           | -5.22255000 | 1.99595800  | 0.60901200  | O  | 5.21640100  | -2.74879400 | -1.46751300 |
| H                           | -3.01079300 | 0.86041900  | 2.89067700  | O  | 4.48839000  | -2.66222300 | -3.60273500 |
| H                           | -4.35903100 | -0.06192200 | 2.16360400  | C  | 0.92498200  | -5.17473600 | -2.64332100 |
| H                           | -5.15091900 | 2.24033700  | 2.62371500  | H  | 1.10645000  | -5.29895200 | -3.71319900 |
| H                           | -3.75231500 | 2.92152400  | 1.75037500  | H  | 1.07812800  | -6.11511900 | -2.11375300 |
| H                           | -4.29735600 | -0.41444800 | -0.24786100 | H  | -0.08752500 | -4.79762500 | -2.48219600 |
| H                           | -2.90835600 | 0.24467500  | -1.13949800 | C  | 5.80003000  | -3.05650300 | -4.04238400 |
| H                           | -3.68673900 | 2.56968600  | -0.67398800 | H  | 5.74141800  | -3.10541600 | -5.12917600 |
| H                           | -5.04340300 | 1.66019500  | -1.38841900 | H  | 6.54617000  | -2.32232800 | -3.72860600 |
| H                           | -0.58491700 | -0.05128100 | 2.51884200  | H  | 6.06553800  | -4.03103300 | -3.62575200 |
| H                           | -0.71259700 | 1.85047000  | 1.86913100  | S  | 1.06001000  | 1.57455300  | -2.49149900 |
| <b>E-TS2bb<sup>pH</sup></b> |             |             |             | O  | 0.97281200  | 1.39136400  | -3.94922100 |
| C                           | 2.90280000  | -2.10915300 | -1.91567700 | O  | -0.05259900 | 2.19826200  | -1.74557500 |
| C                           | 2.69114400  | -0.65784000 | -2.40339200 | C  | 2.52082200  | 2.59289600  | -2.18058800 |
| H                           | 3.60076800  | -0.07516900 | -2.20720400 | C  | 3.45677900  | 2.77001200  | -3.20073500 |
| H                           | 2.53127900  | -0.66897200 | -3.48455000 | C  | 2.67804100  | 3.20624600  | -0.93527700 |
| C                           | 2.71926400  | -2.18419100 | -0.38472500 | C  | 4.57737000  | 3.56795100  | -2.96142200 |
| H                           | 2.92881400  | -3.19620800 | -0.04629000 | H  | 3.28884700  | 2.30222200  | -4.16480800 |
| H                           | 3.47148300  | -1.52936600 | 0.07147100  | C  | 3.80140400  | 3.99943300  | -0.70635300 |
| C                           | 1.49954800  | 0.00060700  | -1.73978600 | H  | 1.92057800  | 3.07643900  | -0.16972800 |
| C                           | 0.82049700  | -0.53483900 | -0.69299100 | C  | 4.75088900  | 4.17702100  | -1.71703900 |
| C                           | -0.43457200 | 0.00823500  | -0.10352100 | H  | 5.31031300  | 3.71752300  | -3.74858100 |
| H                           | -1.16266900 | 0.45004900  | -0.77128400 | H  | 3.93326200  | 4.48466300  | 0.25618000  |
| C                           | -0.42785400 | 0.43743800  | 1.24776500  | H  | 5.62379700  | 4.79720700  | -1.53519500 |
| C                           | -1.34710500 | 1.56687000  | 1.69116200  | Rh | -1.37726200 | -1.64517300 | 0.96192000  |
| H                           | -0.89434500 | 2.49190100  | 1.30505000  | Cl | -1.94019800 | -2.90101200 | -1.09089900 |

|                               |             |             |             |    |             |             |             |
|-------------------------------|-------------|-------------|-------------|----|-------------|-------------|-------------|
| C                             | -2.10919600 | -3.11348100 | 2.02227100  | H  | 0.31292600  | -0.70210700 | 8.45429500  |
| O                             | -2.56040800 | -3.96682600 | 2.63716000  | H  | -1.40670900 | -0.67249900 | 8.10363400  |
| C                             | 0.84279700  | -3.60775300 | 1.63717600  | H  | -0.84273700 | -2.61861500 | 9.57607000  |
| H                             | 0.23641000  | -4.45867100 | 1.30481300  | H  | -1.43891500 | -3.19970000 | 8.01583200  |
| H                             | 1.89541300  | -3.88695700 | 1.53427600  | H  | 0.29362300  | -3.22922500 | 8.36606900  |
| H                             | 0.64221600  | -3.45860700 | 2.70434700  | C  | 1.62128400  | -2.27978800 | -0.48276600 |
| C                             | -5.48494400 | 0.28919900  | -0.27995600 | C  | 0.90719200  | -3.01859300 | 0.40479900  |
| C                             | -4.45477100 | -0.82697000 | -0.20937300 | C  | 2.09491300  | -3.22713400 | -3.28688800 |
| C                             | -4.32422500 | -0.51227300 | 2.14420700  | O  | 1.40236200  | -2.79639100 | -4.17717100 |
| C                             | -5.37379500 | 0.58755900  | 2.03714200  | O  | 2.07855500  | -4.50572700 | -2.86351200 |
| O                             | -3.57323700 | -0.59462200 | 0.91638300  | C  | 4.53832900  | -2.78087500 | -2.95145600 |
| O                             | -6.23358900 | 0.37022700  | 0.92954700  | O  | 5.46752800  | -3.02930100 | -2.21469000 |
| H                             | -3.60535300 | -0.29337000 | 2.93693500  | O  | 4.62784000  | -2.77092600 | -4.29449700 |
| H                             | -4.80664800 | -1.48131500 | 2.33642100  | C  | 1.07430000  | -5.33796900 | -3.48216500 |
| H                             | -6.00117600 | 0.59934000  | 2.93394500  | H  | 1.19731200  | -5.34047300 | -4.56735400 |
| H                             | -4.87272300 | 1.56601300  | 1.95075800  | H  | 1.23197200  | -6.33582700 | -3.07297800 |
| H                             | -4.94685400 | -1.79903400 | -0.07982700 | H  | 0.07958000  | -4.96526100 | -3.22621300 |
| H                             | -3.82089300 | -0.87722000 | -1.09453700 | C  | 5.92181800  | -3.09199000 | -4.83521900 |
| H                             | -4.98437800 | 1.24990000  | -0.48383300 | H  | 5.80693100  | -3.04027300 | -5.91729000 |
| H                             | -6.20012300 | 0.09285300  | -1.08401000 | H  | 6.66935400  | -2.37286300 | -4.49157300 |
| H                             | 0.51545300  | 0.37208300  | 1.78687500  | H  | 6.22658400  | -4.09475300 | -4.52636000 |
| H                             | -0.97460900 | -0.76505000 | 2.24597300  | S  | 1.07829300  | 1.19824100  | -2.68806300 |
| <b>Z-INT-3bb<sup>PH</sup></b> |             |             |             | O  | 1.44239600  | 1.26106100  | -4.11193000 |
| C                             | 3.12537800  | -2.39897000 | -2.48747000 | O  | -0.30883600 | 1.43179300  | -2.24553900 |
| C                             | 2.89103900  | -0.90151800 | -2.77516200 | C  | 2.10582300  | 2.41535500  | -1.83519200 |
| H                             | 3.78160100  | -0.33380700 | -2.47124500 | C  | 3.37877700  | 2.70712900  | -2.33139800 |
| H                             | 2.75265900  | -0.75247900 | -3.84751400 | C  | 1.60067100  | 3.06682800  | -0.70752400 |
| C                             | 3.00512200  | -2.65971000 | -0.97271900 | C  | 4.16864400  | 3.64466900  | -1.66445200 |
| H                             | 3.23166000  | -3.70448300 | -0.77432000 | H  | 3.72713200  | 2.22686000  | -3.23937000 |
| H                             | 3.77740100  | -2.06286700 | -0.47237800 | C  | 2.39716000  | 4.00643100  | -0.05156100 |
| C                             | 1.66856000  | -0.38454700 | -2.05083300 | H  | 0.58841100  | 2.85624600  | -0.37940700 |
| C                             | 1.05084700  | -1.04351600 | -1.03599400 | C  | 3.68172300  | 4.28790400  | -0.52410100 |
| C                             | -0.23044700 | -0.60350500 | -0.40995500 | H  | 5.15896100  | 3.88077700  | -2.04215400 |
| H                             | -1.07963800 | -0.47943600 | -1.06930200 | H  | 2.01160900  | 4.52636500  | 0.82048300  |
| C                             | -0.32533100 | -0.15837900 | 0.89067400  | H  | 4.29866500  | 5.01971400  | -0.01093100 |
| C                             | 0.84666200  | 0.18768100  | 1.79361500  | Rh | -0.97482000 | -2.41830500 | 0.80570200  |
| H                             | 1.68948100  | -0.48006300 | 1.59234700  | Cl | -1.86852000 | -3.21405500 | -1.42942000 |
| H                             | 1.18375100  | 1.19501300  | 1.50427100  | C  | -1.55040600 | -4.11973600 | 1.45075700  |
| C                             | 0.52101500  | 0.18187900  | 3.22063000  | O  | -1.93470300 | -5.12443500 | 1.84001300  |
| C                             | 0.26170700  | 0.19606700  | 4.40347700  | C  | 1.40964900  | -4.26924600 | 1.06988500  |
| C                             | -0.03035600 | 0.18120100  | 5.83844400  | H  | 0.88486000  | -5.15094300 | 0.68113500  |
| C                             | -0.17589400 | -1.24111700 | 6.42008300  | H  | 2.48012700  | -4.42778300 | 0.91602500  |
| H                             | -0.95025600 | 0.75025300  | 6.03243900  | H  | 1.23230000  | -4.23373300 | 2.14958300  |
| H                             | 0.76850200  | 0.71228600  | 6.37427800  | C  | -5.34184700 | -0.73001900 | 0.67425500  |
| C                             | -0.48350200 | -1.23975600 | 7.92201400  | C  | -4.32218300 | -1.85373100 | 0.58403200  |
| H                             | -0.97063700 | -1.76937400 | 5.87786900  | C  | -3.44198000 | -1.17913100 | 2.69012300  |
| H                             | 0.74906000  | -1.79916700 | 6.22932200  | C  | -4.48791900 | -0.07186800 | 2.74939800  |
| C                             | -0.62612100 | -2.64974200 | 8.50358100  | O  | -3.13059900 | -1.47965000 | 1.31642100  |

|                               |             |             |             |    |             |             |             |
|-------------------------------|-------------|-------------|-------------|----|-------------|-------------|-------------|
| O                             | -5.65713000 | -0.43427100 | 2.03262800  | O  | 5.37681300  | -2.63117500 | -1.34539400 |
| H                             | -2.50614700 | -0.87388700 | 3.16460300  | O  | 4.70290700  | -2.65422400 | -3.49982000 |
| H                             | -3.82064200 | -2.08708500 | 3.18163300  | C  | 1.22337700  | -5.34777900 | -2.47314600 |
| H                             | -4.78902100 | 0.10979600  | 3.78597600  | H  | 1.45961100  | -5.53420000 | -3.52300900 |
| H                             | -4.05985800 | 0.85929300  | 2.34156100  | H  | 1.38702500  | -6.24443800 | -1.87518000 |
| H                             | -4.72997800 | -2.77563700 | 1.02216100  | H  | 0.19089700  | -5.00156900 | -2.38385900 |
| H                             | -4.00172000 | -2.05499800 | -0.43926200 | C  | 6.04870100  | -2.97403500 | -3.89456700 |
| H                             | -4.95158700 | 0.16790100  | 0.16886700  | H  | 6.02156500  | -3.06101300 | -4.98019700 |
| H                             | -6.27594100 | -1.02570000 | 0.18798500  | H  | 6.73640400  | -2.18213200 | -3.58770200 |
| H                             | -0.48134500 | -2.08702400 | 2.24851700  | H  | 6.36687000  | -3.91502400 | -3.43953000 |
| H                             | -1.28452800 | 0.25118500  | 1.19524100  | S  | 0.93998500  | 1.34282900  | -2.65320400 |
| <b>E-INT-3bb<sup>BH</sup></b> |             |             |             | O  | 0.92090800  | 1.09695800  | -4.10374600 |
| C                             | 3.04010500  | -2.15585000 | -1.87041000 | O  | -0.24852300 | 1.88798000  | -1.96541000 |
| C                             | 2.73956500  | -0.74674300 | -2.42683500 | C  | 2.29548000  | 2.49562300  | -2.33775900 |
| H                             | 3.59767100  | -0.09004000 | -2.23253100 | C  | 3.25882600  | 2.69948500  | -3.32714400 |
| H                             | 2.61048900  | -0.81405600 | -3.51007700 | C  | 2.34392200  | 3.18333200  | -1.12254500 |
| C                             | 2.82959700  | -2.17054200 | -0.34179900 | C  | 4.29736800  | 3.60103800  | -3.08609800 |
| H                             | 3.10797500  | -3.14642300 | 0.04829800  | H  | 3.17372100  | 2.17175700  | -4.27089000 |
| H                             | 3.52077700  | -1.43892400 | 0.09421300  | C  | 3.38612500  | 4.08034200  | -0.89204100 |
| C                             | 1.48395100  | -0.15645600 | -1.82211200 | H  | 1.56566300  | 3.02925900  | -0.38280800 |
| C                             | 0.81818100  | -0.69588800 | -0.76842400 | C  | 4.36293100  | 4.28556100  | -1.87084300 |
| C                             | -0.48969000 | -0.19205800 | -0.25986600 | H  | 5.05026400  | 3.77235300  | -3.84963700 |
| H                             | -1.26723900 | 0.02248300  | -0.98135600 | H  | 3.43289800  | 4.62423600  | 0.04670400  |
| C                             | -0.60120200 | 0.29439800  | 1.02637300  | H  | 5.17220000  | 4.98644200  | -1.68774900 |
| C                             | -1.70345300 | 1.24855700  | 1.44067700  | Rh | -1.31670800 | -1.95412800 | 0.95077900  |
| H                             | -1.41658300 | 2.23327800  | 1.03961100  | Cl | -1.77165900 | -2.96517300 | -1.32269500 |
| H                             | -2.63634000 | 0.97811400  | 0.93664700  | C  | -1.91212900 | -3.63841000 | 1.63746000  |
| C                             | -1.90627000 | 1.35673900  | 2.88650600  | O  | -2.29845100 | -4.63836000 | 2.03636900  |
| C                             | -2.06293000 | 1.46361900  | 4.08262300  | C  | 1.10596900  | -3.59320500 | 1.77170500  |
| C                             | -2.22513500 | 1.62375100  | 5.52947900  | H  | 0.67985200  | -4.55428400 | 1.45756900  |
| C                             | -1.17014000 | 2.55557500  | 6.16303700  | H  | 2.19457800  | -3.69547600 | 1.76192000  |
| H                             | -2.17759000 | 0.63906400  | 6.01470800  | H  | 0.79614600  | -3.42336800 | 2.80797000  |
| H                             | -3.22941000 | 2.01630700  | 5.74119600  | C  | -5.71192200 | -0.56486800 | -0.05922100 |
| C                             | -1.35758600 | 2.71853600  | 7.67568500  | C  | -4.57655000 | -1.57590800 | -0.04463400 |
| H                             | -0.17017400 | 2.15639300  | 5.95220400  | C  | -4.31897400 | -1.20540100 | 2.28897300  |
| H                             | -1.22124800 | 3.53588800  | 5.67318300  | C  | -5.47277200 | -0.21159300 | 2.24130200  |
| C                             | -0.31233800 | 3.64061800  | 8.31125700  | O  | -3.64742000 | -1.23698600 | 1.01316500  |
| H                             | -2.36378800 | 3.11122600  | 7.87630500  | O  | -6.38166700 | -0.52825600 | 1.19742600  |
| H                             | -1.31526600 | 1.73107000  | 8.15538900  | H  | -3.57228100 | -0.90665600 | 3.02653800  |
| H                             | -0.47006700 | 3.73787500  | 9.39009900  | H  | -4.69463000 | -2.21247700 | 2.52176800  |
| H                             | 0.70192600  | 3.25564700  | 8.15659200  | H  | -6.03719400 | -0.24348200 | 3.17855300  |
| H                             | -0.35387300 | 4.64581700  | 7.87689300  | H  | -5.07241100 | 0.80705700  | 2.11116700  |
| C                             | 1.39301100  | -1.81959400 | -0.01871900 | H  | -4.96648600 | -2.58638200 | 0.13708300  |
| C                             | 0.62842600  | -2.48110600 | 0.88367500  | H  | -3.99955100 | -1.58763800 | -0.96941400 |
| C                             | 2.12900600  | -3.17971000 | -2.58673800 | H  | -5.32027800 | 0.43413500  | -0.31205500 |
| O                             | 1.53065200  | -2.96982300 | -3.61400000 | H  | -6.45762900 | -0.84479200 | -0.80906500 |
| O                             | 2.11462300  | -4.35284900 | -1.92567500 | H  | 0.27438800  | 0.27649700  | 1.66886900  |
| C                             | 4.50256500  | -2.51343700 | -2.17578100 | H  | -1.08514800 | -1.47678400 | 2.42357000  |



|                             |             |             |             |                             |             |             |             |
|-----------------------------|-------------|-------------|-------------|-----------------------------|-------------|-------------|-------------|
| <b>Z-TS3bb<sup>BH</sup></b> |             |             |             | O                           | 3.08850900  | 1.04979900  | -4.40651300 |
| C                           | 3.37824900  | -2.39040700 | -1.87155800 | O                           | 0.73396400  | 1.55173400  | -3.52686900 |
| C                           | 3.55016800  | -0.97052800 | -2.44835600 | C                           | 2.80975500  | 2.72324100  | -2.38661900 |
| H                           | 4.46108900  | -0.52590300 | -2.02325200 | C                           | 4.19200800  | 2.87606600  | -2.24709000 |
| H                           | 3.69107200  | -1.02118300 | -3.52869400 | C                           | 1.91820100  | 3.67133700  | -1.88131700 |
| C                           | 2.91317300  | -2.30688600 | -0.40501800 | C                           | 4.68497300  | 3.98479300  | -1.55987400 |
| H                           | 2.79723100  | -3.31443300 | -0.00964600 | H                           | 4.86651800  | 2.15174700  | -2.69158800 |
| H                           | 3.72154000  | -1.83725400 | 0.16974800  | C                           | 2.42407500  | 4.78196000  | -1.20172500 |
| C                           | 2.35564200  | -0.09719100 | -2.14615500 | H                           | 0.85394500  | 3.54313200  | -2.04624200 |
| C                           | 1.46109300  | -0.35050300 | -1.15608300 | C                           | 3.80269600  | 4.93306200  | -1.03418500 |
| C                           | 0.20302600  | 0.43293000  | -0.95990400 | H                           | 5.75682600  | 4.11532700  | -1.44524800 |
| H                           | -0.49536000 | 0.45345100  | -1.79142100 | H                           | 1.74204300  | 5.53263300  | -0.81361700 |
| C                           | -0.02355300 | 1.28502400  | 0.09552200  | H                           | 4.19152900  | 5.79795400  | -0.50487100 |
| C                           | 1.00954800  | 1.69545000  | 1.12631300  | Rh                          | -1.09103400 | -0.78960600 | 0.49374500  |
| H                           | 1.84094200  | 0.98275400  | 1.13562000  | Cl                          | -3.09253900 | 0.05918800  | -0.54282600 |
| H                           | 1.43407200  | 2.64728400  | 0.77105600  | C                           | -2.19649100 | -2.05289500 | 1.41334400  |
| C                           | 0.47850600  | 1.87835400  | 2.47807600  | O                           | -2.85866900 | -2.80557800 | 1.96065700  |
| C                           | 0.06747700  | 2.04948700  | 3.60366000  | C                           | 0.81755800  | -3.06043400 | 1.53239400  |
| C                           | -0.42309800 | 2.25386700  | 4.96742000  | H                           | 0.75706600  | -3.98628700 | 0.94652500  |
| C                           | -1.60673600 | 1.34077600  | 5.35103700  | H                           | 1.78556600  | -3.06370300 | 2.04682700  |
| H                           | -0.72080700 | 3.30415700  | 5.09176100  | H                           | 0.04362000  | -3.10514600 | 2.29843500  |
| H                           | 0.40366600  | 2.08983700  | 5.67279800  | C                           | -6.13952400 | 0.80450800  | 1.76869900  |
| C                           | -2.05229400 | 1.54438800  | 6.80422700  | C                           | -6.19213800 | -0.69930600 | 1.52866600  |
| H                           | -2.44555500 | 1.53761700  | 4.67166400  | C                           | -6.31915800 | -1.06312100 | 3.84182200  |
| H                           | -1.31758900 | 0.29410300  | 5.19363400  | C                           | -6.26195500 | 0.44271000  | 4.08178400  |
| C                           | -3.22198700 | 0.64098000  | 7.20602400  | O                           | -5.63649800 | -1.40286400 | 2.64153900  |
| H                           | -1.20029800 | 1.35911700  | 7.47282100  | O                           | -6.81404700 | 1.14849400  | 2.98016500  |
| H                           | -2.33302500 | 2.59587600  | 6.95372100  | H                           | -5.82920600 | -1.61007800 | 4.65444600  |
| H                           | -3.51065300 | 0.80324200  | 8.24947100  | H                           | -7.37293300 | -1.38430200 | 3.78525000  |
| H                           | -4.10276700 | 0.83409700  | 6.58351900  | H                           | -6.84556500 | 0.72288900  | 4.96564200  |
| H                           | -2.96227200 | -0.41768000 | 7.09290600  | H                           | -5.21139300 | 0.74231700  | 4.24324300  |
| C                           | 1.63570400  | -1.50381600 | -0.26379900 | H                           | -7.23716600 | -1.01493200 | 1.37305500  |
| C                           | 0.66656300  | -1.85404000 | 0.63108900  | H                           | -5.59631100 | -0.96799300 | 0.65313900  |
| C                           | 2.36487300  | -3.17707600 | -2.72308600 | H                           | -5.08876600 | 1.13059900  | 1.80885800  |
| O                           | 1.81530300  | -2.77015000 | -3.71852400 | H                           | -6.64214300 | 1.34787700  | 0.96288300  |
| O                           | 2.16551100  | -4.40709100 | -2.20086300 | H                           | -0.93633900 | 1.87519100  | 0.07469600  |
| C                           | 4.73526800  | -3.10903600 | -1.92609700 | H                           | -0.05813600 | -0.74656700 | 1.65192400  |
| O                           | 5.45500100  | -3.30596600 | -0.97237500 | <b>E-TS3bb<sup>BH</sup></b> |             |             |             |
| O                           | 5.04542000  | -3.45356000 | -3.18901000 | C                           | 3.04452000  | -2.02161800 | -1.54831700 |
| C                           | 1.24788600  | -5.24196900 | -2.93290500 | C                           | 3.21474100  | -0.69049100 | -2.30879800 |
| H                           | 1.60836800  | -5.40088500 | -3.95181400 | H                           | 4.09793700  | -0.16676500 | -1.91813500 |
| H                           | 1.20889300  | -6.18404600 | -2.38670100 | H                           | 3.39929200  | -0.89471200 | -3.36605200 |
| H                           | 0.25980100  | -4.77789100 | -2.97475100 | C                           | 2.38150100  | -1.75357200 | -0.18236800 |
| C                           | 6.31838400  | -4.10345700 | -3.36526900 | H                           | 2.30970900  | -2.68336200 | 0.37800100  |
| H                           | 6.39697100  | -4.30626800 | -4.43257200 | H                           | 3.04928300  | -1.09304400 | 0.38482800  |
| H                           | 7.12898900  | -3.44926100 | -3.03613200 | C                           | 1.99948500  | 0.20236600  | -2.20069900 |
| H                           | 6.35420500  | -5.03187800 | -2.79071400 | C                           | 0.95981900  | -0.00486900 | -1.34977800 |
| S                           | 2.16496700  | 1.29923200  | -3.28818400 | C                           | -0.31483400 | 0.77385300  | -1.40126200 |

|   |             |             |             |                               |             |             |             |
|---|-------------|-------------|-------------|-------------------------------|-------------|-------------|-------------|
| H | -0.76887100 | 0.92428800  | -2.37348000 | H                             | 3.51691300  | 5.05684100  | -0.13317800 |
| C | -0.79648400 | 1.48973600  | -0.33211500 | H                             | 5.89607500  | 4.95822400  | -0.83186600 |
| C | -1.90108100 | 2.52737400  | -0.42833800 | Rh                            | -1.82419800 | -0.65513200 | -0.35840800 |
| H | -2.34800900 | 2.49925400  | -1.42622200 | Cl                            | -3.52316200 | -0.08735600 | -1.96510700 |
| H | -2.70621100 | 2.27145600  | 0.27263400  | C                             | -3.00175400 | -2.05562300 | 0.18396300  |
| C | -1.40151200 | 3.86888900  | -0.10837100 | O                             | -3.71319900 | -2.90583500 | 0.46505000  |
| C | -1.04613700 | 4.99033500  | 0.17821800  | C                             | -0.03684400 | -2.67667800 | 1.28115000  |
| C | -0.65465100 | 6.36050400  | 0.51411600  | H                             | 0.25580400  | -3.60246000 | 0.77198400  |
| C | 0.86969200  | 6.59622100  | 0.52379700  | H                             | 0.69315600  | -2.49855600 | 2.08014300  |
| H | -1.06637200 | 6.62475900  | 1.49813900  | H                             | -1.00208400 | -2.84669700 | 1.75807100  |
| H | -1.12027200 | 7.05023400  | -0.20318400 | C                             | -5.47402300 | 1.02935300  | 3.79163800  |
| C | 1.23919100  | 8.03978400  | 0.88555500  | C                             | -4.78791300 | 0.49332700  | 2.54010700  |
| H | 1.33266900  | 5.90402700  | 1.23946600  | C                             | -5.10928400 | -1.70135000 | 3.30799800  |
| H | 1.27493200  | 6.34552100  | -0.46423400 | C                             | -5.79541700 | -1.16112000 | 4.55828800  |
| C | 2.75105300  | 8.28609200  | 0.90124600  | O                             | -4.15710500 | -0.75776500 | 2.81793000  |
| H | 0.76421200  | 8.72398000  | 0.16970000  | O                             | -6.42033300 | 0.08767200  | 4.28604600  |
| H | 0.81669200  | 8.28656300  | 1.86897600  | H                             | -4.56021000 | -2.62278100 | 3.52517100  |
| H | 2.98387800  | 9.32526400  | 1.15463400  | H                             | -5.86299800 | -1.91313200 | 2.53338500  |
| H | 3.24961500  | 7.64636800  | 1.63892100  | H                             | -6.58189500 | -1.84178800 | 4.89935600  |
| H | 3.19652300  | 8.07543600  | -0.07766400 | H                             | -5.05200900 | -1.04794600 | 5.36495900  |
| C | 1.03045900  | -1.09676100 | -0.36565000 | H                             | -5.52548400 | 0.37229800  | 1.73177700  |
| C | -0.07839300 | -1.52472200 | 0.30121400  | H                             | -4.00162700 | 1.17256300  | 2.19779400  |
| C | 2.18935600  | -2.99530100 | -2.38006700 | H                             | -4.71597200 | 1.24717600  | 4.56236500  |
| O | 1.73993500  | -2.77704200 | -3.47921200 | H                             | -6.02630000 | 1.94855100  | 3.57277500  |
| O | 2.00238800  | -4.15243500 | -1.70584500 | H                             | -0.22533800 | 1.50134100  | 0.59405000  |
| C | 4.42917300  | -2.64650200 | -1.32723100 | H                             | -1.15858000 | -0.54169200 | 1.04371200  |
| O | 5.00990300  | -2.69265400 | -0.26594400 | <b>Z-INT-4bb<sup>PH</sup></b> |             |             |             |
| O | 4.93801200  | -3.10438600 | -2.48653300 | C                             | 1.95963300  | 0.02130000  | -2.77028300 |
| C | 1.23370700  | -5.15008600 | -2.40542200 | C                             | 0.89762600  | 1.13903200  | -2.64773200 |
| H | 1.71082100  | -5.40080400 | -3.35544600 | H                             | 1.35793500  | 2.10118800  | -2.90982200 |
| H | 1.20869100  | -6.01691800 | -1.74555100 | H                             | 0.10468700  | 0.97880400  | -3.38073800 |
| H | 0.22310500  | -4.78454400 | -2.60224500 | C                             | 2.65083800  | -0.25831800 | -1.41518600 |
| C | 6.25267500  | -3.68575400 | -2.40487900 | H                             | 3.30317600  | -1.12310300 | -1.51819000 |
| H | 6.49706600  | -3.99853600 | -3.41931100 | H                             | 3.29790600  | 0.60415700  | -1.20579900 |
| H | 6.97395900  | -2.94881400 | -2.04393400 | C                             | 0.27866900  | 1.28812700  | -1.28373600 |
| H | 6.24904600  | -4.54185900 | -1.72618900 | C                             | 0.61341000  | 0.61122900  | -0.15835500 |
| S | 2.08325100  | 1.60419800  | -3.33807000 | C                             | -0.04307200 | 0.88026900  | 1.15909900  |
| O | 2.69582900  | 1.12405400  | -4.58735600 | H                             | -1.09687700 | 0.64019800  | 1.22792500  |
| O | 0.79594700  | 2.31954000  | -3.35083000 | C                             | 0.54083900  | 1.42538100  | 2.23450800  |
| C | 3.29099300  | 2.68149700  | -2.54003300 | C                             | 1.96725200  | 1.92632400  | 2.34859000  |
| C | 4.62354800  | 2.62400400  | -2.95368900 | H                             | 2.56479800  | 1.20580500  | 2.92840200  |
| C | 2.87528400  | 3.55488800  | -1.53122700 | H                             | 2.43411400  | 1.98056100  | 1.35769600  |
| C | 5.56209900  | 3.45006800  | -2.33300700 | C                             | 2.03769600  | 3.23337800  | 3.01221700  |
| H | 4.90280600  | 1.95723200  | -3.76229000 | C                             | 2.07518400  | 4.29670200  | 3.59005400  |
| C | 3.82427000  | 4.37187500  | -0.91696900 | C                             | 2.10722700  | 5.57803200  | 4.29885100  |
| H | 1.82806700  | 3.60634100  | -1.24990100 | C                             | 0.72618200  | 6.26047500  | 4.40102900  |
| C | 5.16362500  | 4.31721800  | -1.31389800 | H                             | 2.81213400  | 6.25650900  | 3.79805600  |
| H | 6.60036300  | 3.41974600  | -2.64957900 | H                             | 2.50931200  | 5.42250300  | 5.30953900  |

|    |             |             |             |                               |             |             |             |
|----|-------------|-------------|-------------|-------------------------------|-------------|-------------|-------------|
| C  | 0.78243400  | 7.59581300  | 5.15164500  | C                             | -0.17217300 | -5.55504800 | -0.45867900 |
| H  | 0.32717500  | 6.41786100  | 3.39087100  | C                             | -1.61594300 | -3.99327900 | -1.57919600 |
| H  | 0.02815800  | 5.57909800  | 4.90276500  | C                             | -1.91888700 | -5.06968100 | -2.61181600 |
| C  | -0.58345900 | 8.28182200  | 5.25464400  | O                             | -0.30431600 | -4.22827300 | -1.01568800 |
| H  | 1.18636900  | 7.42830900  | 6.15942300  | O                             | -1.82069700 | -6.36905900 | -2.04365400 |
| H  | 1.49261700  | 8.26591500  | 4.64772800  | H                             | -1.57225400 | -3.00505600 | -2.03895600 |
| H  | -0.51315000 | 9.23119400  | 5.79516200  | H                             | -2.36254400 | -4.00865700 | -0.77376200 |
| H  | -0.99667000 | 8.49340800  | 4.26204300  | H                             | -2.94214300 | -4.95634200 | -2.98216400 |
| H  | -1.30518800 | 7.64984700  | 5.78411200  | H                             | -1.22404700 | -4.96776500 | -3.46037900 |
| C  | 1.70736700  | -0.42073700 | -0.23436600 | H                             | -0.84825400 | -5.65073000 | 0.40236600  |
| C  | 2.13867800  | -1.10420000 | 0.93879200  | H                             | 0.86702900  | -5.64117400 | -0.13782400 |
| C  | 1.30253700  | -1.25955200 | -3.31679400 | H                             | 0.23337300  | -6.54093600 | -2.33066000 |
| O  | 0.13062600  | -1.54808000 | -3.17900800 | H                             | -0.50445300 | -7.59154800 | -1.09170900 |
| O  | 2.19879600  | -2.01162900 | -3.96345500 | H                             | -0.06628100 | 1.56226600  | 3.12675700  |
| C  | 3.03051800  | 0.48933800  | -3.77167300 | H                             | 1.58421800  | -0.86811400 | 1.84080400  |
| O  | 4.19726700  | 0.68212700  | -3.51558600 | <b>E-INT-4bb<sup>PH</sup></b> |             |             |             |
| O  | 2.47909700  | 0.71606900  | -4.98082400 | C                             | 1.69539200  | -1.85165500 | -1.72313500 |
| C  | 1.73472900  | -3.28152300 | -4.46142500 | C                             | 1.35750400  | -0.61876500 | -2.59213400 |
| H  | 0.84179600  | -3.14202200 | -5.07510900 | H                             | 2.26188900  | -0.30604500 | -3.13162500 |
| H  | 2.55689800  | -3.67528100 | -5.05800700 | H                             | 0.63201400  | -0.89175200 | -3.36026300 |
| H  | 1.52594500  | -3.94279000 | -3.61914400 | C                             | 2.13793600  | -1.43509400 | -0.30137400 |
| C  | 3.38883900  | 1.16043900  | -6.00228800 | H                             | 2.28051600  | -2.32724700 | 0.30533200  |
| H  | 2.77992900  | 1.30551600  | -6.89418600 | H                             | 3.12249700  | -0.95903000 | -0.40323400 |
| H  | 3.87068900  | 2.09578400  | -5.70760900 | C                             | 0.84825400  | 0.57447700  | -1.82862000 |
| H  | 4.15842700  | 0.40546900  | -6.18013300 | C                             | 0.77296500  | 0.70703400  | -0.48117100 |
| S  | -1.01351000 | 2.58099000  | -1.31677200 | C                             | 0.31132300  | 1.97177000  | 0.16208400  |
| O  | -1.63064800 | 2.50151700  | -2.65260900 | H                             | -0.68372100 | 2.31607300  | -0.09408000 |
| O  | -1.84903000 | 2.51067300  | -0.10947200 | C                             | 1.06767200  | 2.71395500  | 0.97945900  |
| C  | -0.06952300 | 4.11511400  | -1.26121500 | C                             | 0.58946900  | 3.98884700  | 1.64006500  |
| C  | 0.13707000  | 4.82237000  | -2.44752200 | H                             | 1.20488500  | 4.83513000  | 1.29868400  |
| C  | 0.43025900  | 4.57210400  | -0.03925100 | H                             | -0.43780300 | 4.20561200  | 1.32233900  |
| C  | 0.86738600  | 6.01142500  | -2.40629400 | C                             | 0.66293400  | 3.90173900  | 3.10342500  |
| H  | -0.28707400 | 4.44798200  | -3.37288900 | C                             | 0.73955600  | 3.80339500  | 4.30752400  |
| C  | 1.16734000  | 5.75533900  | -0.01458700 | C                             | 0.81782300  | 3.67340900  | 5.76351200  |
| H  | 0.24118600  | 4.02034000  | 0.87475800  | C                             | 0.59582900  | 2.23048600  | 6.26500000  |
| C  | 1.38496400  | 6.47306500  | -1.19413100 | H                             | 0.07369600  | 4.33621900  | 6.22671000  |
| H  | 1.02955000  | 6.57619000  | -3.31948500 | H                             | 1.79709000  | 4.03179500  | 6.11056400  |
| H  | 1.57112800  | 6.11099100  | 0.92797300  | C                             | 0.67922800  | 2.11505900  | 7.79124300  |
| H  | 1.95716400  | 7.39594800  | -1.16768700 | H                             | -0.38421900 | 1.88000600  | 5.91777800  |
| Rh | 0.87754300  | -2.50632700 | -0.13697800 | H                             | 1.34144600  | 1.57262700  | 5.80090000  |
| Cl | 2.74052200  | -3.71268100 | -1.08531800 | C                             | 0.45861500  | 0.68564100  | 8.29611300  |
| C  | -0.65543100 | -2.03021800 | 0.79303900  | H                             | 1.66015300  | 2.47620800  | 8.12946000  |
| O  | -1.64368700 | -1.94325000 | 1.38686600  | H                             | -0.06418000 | 2.78383500  | 8.24626000  |
| C  | 3.55389300  | -1.54555700 | 1.22584600  | H                             | 0.52232900  | 0.63345000  | 9.38777800  |
| H  | 4.10667200  | -1.85944700 | 0.34318500  | H                             | -0.52781600 | 0.30973100  | 8.00179600  |
| H  | 4.08979900  | -0.71076000 | 1.70172800  | H                             | 1.20851600  | -0.00004300 | 7.88583200  |
| H  | 3.55548900  | -2.37971000 | 1.93223500  | C                             | 1.21667100  | -0.44083300 | 0.38794100  |
| C  | -0.51503100 | -6.58640200 | -1.52393000 | C                             | 1.23143800  | -0.31926400 | 1.80728000  |

|    |             |             |             |             |             |             |             |
|----|-------------|-------------|-------------|-------------|-------------|-------------|-------------|
| C  | 0.48019300  | -2.79513700 | -1.66369600 | H           | -3.14765500 | -5.32342200 | 1.75243300  |
| O  | -0.67335500 | -2.45026300 | -1.82644000 | H           | -4.30941600 | -4.87572300 | 3.03040800  |
| O  | 0.86862800  | -4.04874400 | -1.40897900 | H           | 2.08609100  | 2.41275900  | 1.22080200  |
| C  | 2.86127900  | -2.59711600 | -2.39605700 | H           | 0.84335200  | 0.61042900  | 2.20614200  |
| O  | 3.96809100  | -2.74159800 | -1.92900000 | <b>Z-P3</b> |             |             |             |
| O  | 2.50108300  | -3.02578200 | -3.62254400 | C           | 2.12147700  | 0.17051700  | -2.92929900 |
| C  | -0.17765800 | -5.02618500 | -1.25061300 | C           | 1.11556500  | 1.33982100  | -2.90356200 |
| H  | -0.84196800 | -5.01026300 | -2.11783600 | H           | 1.63045700  | 2.25956700  | -3.21490200 |
| H  | 0.33296600  | -5.98516800 | -1.17082300 | H           | 0.32134100  | 1.16233700  | -3.63120900 |
| H  | -0.73127300 | -4.81512700 | -0.33462000 | C           | 2.95496300  | 0.17735000  | -1.63226500 |
| C  | 3.51572600  | -3.73605700 | -4.35351800 | H           | 3.70467200  | -0.61028900 | -1.67736300 |
| H  | 3.05977900  | -3.99900800 | -5.30758700 | H           | 3.49802300  | 1.12926500  | -1.59733500 |
| H  | 4.39312900  | -3.10311400 | -4.50708600 | C           | 0.49328200  | 1.55524600  | -1.54284400 |
| H  | 3.81718000  | -4.63455600 | -3.80983100 | C           | 0.88152000  | 0.95302100  | -0.38859300 |
| S  | 0.39708900  | 1.92175500  | -2.97811800 | C           | 0.15171400  | 1.11906300  | 0.90170000  |
| O  | 0.04961200  | 1.26759800  | -4.25126900 | H           | -0.89290700 | 0.82817200  | 0.89189000  |
| O  | -0.54584100 | 2.85529300  | -2.34162900 | C           | 0.66152200  | 1.59810300  | 2.04414300  |
| C  | 1.94644500  | 2.80348200  | -3.24681100 | C           | 2.06153500  | 2.13517800  | 2.26531900  |
| C  | 2.77535900  | 2.40895300  | -4.30008600 | H           | 2.65911500  | 1.38597300  | 2.80771800  |
| C  | 2.28224100  | 3.87631100  | -2.41727100 | H           | 2.56866100  | 2.28591900  | 1.30593100  |
| C  | 3.97412000  | 3.09153700  | -4.51025500 | C           | 2.05705000  | 3.38428300  | 3.03605700  |
| H  | 2.46498400  | 1.60148800  | -4.95443200 | C           | 2.04098400  | 4.40021800  | 3.69449200  |
| C  | 3.48236900  | 4.55153200  | -2.63935900 | C           | 2.00835900  | 5.61973500  | 4.50489800  |
| H  | 1.60251000  | 4.18044500  | -1.62988500 | C           | 0.58845100  | 6.19319900  | 4.69841600  |
| C  | 4.32844000  | 4.15663500  | -3.67902700 | H           | 2.64960800  | 6.38451300  | 4.04450900  |
| H  | 4.62519500  | 2.79806100  | -5.32816000 | H           | 2.45087700  | 5.41225400  | 5.48924000  |
| H  | 3.75338200  | 5.39116300  | -2.00628200 | C           | 0.57469900  | 7.45642000  | 5.56689200  |
| H  | 5.26094600  | 4.68717900  | -3.84786700 | H           | 0.15225200  | 6.41209900  | 3.71546600  |
| Rh | -0.54120100 | -1.47610400 | 1.32272000  | H           | -0.04806200 | 5.42292400  | 5.15106200  |
| Cl | 0.48732000  | -3.57468300 | 1.91274500  | C           | -0.83162800 | 8.03072400  | 5.76465500  |
| C  | -1.65106200 | 0.00926100  | 1.22786100  | H           | 1.01878000  | 7.22783900  | 6.54540300  |
| O  | -2.47831300 | 0.81542100  | 1.27746200  | H           | 1.22161900  | 8.21832000  | 5.11056300  |
| C  | 2.24123300  | -0.95850300 | 2.72915900  | H           | -0.81141100 | 8.93060000  | 6.38782600  |
| H  | 2.61381300  | -1.92046200 | 2.38449000  | H           | -1.28835800 | 8.29980400  | 4.80559100  |
| H  | 3.09004500  | -0.26743900 | 2.84069000  | H           | -1.49140400 | 7.30348700  | 6.25105800  |
| H  | 1.80769100  | -1.10710400 | 3.72132400  | C           | 2.05904700  | 0.04051000  | -0.42346600 |
| C  | -3.80547100 | -4.52264300 | 2.12565600  | C           | 2.27488700  | -0.85392600 | 0.56467800  |
| C  | -2.97143900 | -3.28903400 | 2.43795500  | C           | 1.37374800  | -1.16581800 | -3.07465900 |
| C  | -3.41595000 | -2.48893800 | 0.21547400  | O           | 0.17564400  | -1.30522300 | -3.13912500 |
| C  | -4.23873100 | -3.74482300 | -0.03356600 | O           | 2.25370600  | -2.19133600 | -3.11485400 |
| O  | -2.40617500 | -2.76958600 | 1.21350900  | C           | 3.05100600  | 0.34672900  | -4.13764400 |
| O  | -4.81810800 | -4.22645900 | 1.17204200  | O           | 4.21449400  | 0.67630000  | -4.08113100 |
| H  | -2.87272700 | -2.18323000 | -0.67987100 | O           | 2.38518800  | 0.12717600  | -5.28829500 |
| H  | -4.05816100 | -1.67208400 | 0.57113800  | C           | 1.66795300  | -3.49655700 | -3.26382700 |
| H  | -5.06124700 | -3.52391900 | -0.72041700 | H           | 1.10009400  | -3.55617600 | -4.19542000 |
| H  | -3.59973000 | -4.51891900 | -0.48757200 | H           | 2.50460900  | -4.19476200 | -3.27838600 |
| H  | -3.59173700 | -2.51042600 | 2.90331500  | H           | 0.99882900  | -3.71319400 | -2.42776400 |
| H  | -2.12234300 | -3.53136700 | 3.07893800  | C           | 3.15060300  | 0.30170900  | -6.49434900 |

|             |             |             |             |                             |             |             |             |
|-------------|-------------|-------------|-------------|-----------------------------|-------------|-------------|-------------|
| H           | 2.46163500  | 0.08963800  | -7.31118200 | C                           | -0.24323500 | 0.46076600  | 8.25331200  |
| H           | 3.52680200  | 1.32513400  | -6.56336800 | H                           | 1.23438800  | 2.04066000  | 8.25720000  |
| H           | 3.99655200  | -0.38954600 | -6.51276900 | H                           | -0.42388400 | 2.61561200  | 8.27101100  |
| S           | -0.84812700 | 2.77889400  | -1.61080100 | H                           | -0.27118200 | 0.35800900  | 9.34289300  |
| O           | -1.36721600 | 2.76012000  | -2.99003600 | H                           | -1.25144400 | 0.25959900  | 7.87400100  |
| O           | -1.76114300 | 2.61015100  | -0.46964400 | H                           | 0.41845200  | -0.32060100 | 7.86243600  |
| C           | 0.02452900  | 4.34400200  | -1.40132100 | C                           | 1.89090400  | -0.20585900 | 0.21455700  |
| C           | 0.32112100  | 5.10609200  | -2.53311100 | C                           | 1.65408000  | -0.36383100 | 1.53405100  |
| C           | 0.39025200  | 4.76524100  | -0.11999800 | C                           | 0.79220000  | -2.51388700 | -1.29253400 |
| C           | 1.00574600  | 6.31263900  | -2.37611600 | O                           | -0.36816100 | -2.28841900 | -1.54132000 |
| H           | -0.00125800 | 4.75923600  | -3.50893100 | O                           | 1.20893700  | -3.54206200 | -0.51973400 |
| C           | 1.08242300  | 5.96717100  | 0.02158000  | C                           | 2.91068400  | -2.61475500 | -2.60845300 |
| H           | 0.13410900  | 4.16782500  | 0.74781000  | O                           | 4.11131100  | -2.70176700 | -2.48024100 |
| C           | 1.38972500  | 6.73870100  | -1.10287700 | O                           | 2.20111700  | -3.29087100 | -3.53339400 |
| H           | 1.23610200  | 6.91887500  | -3.24719100 | C                           | 0.16329900  | -4.38993400 | -0.01322200 |
| H           | 1.38148500  | 6.29572800  | 1.01202600  | H                           | -0.39832700 | -4.83675500 | -0.83707000 |
| H           | 1.92640300  | 7.67581500  | -0.98551400 | H                           | 0.66590800  | -5.15984700 | 0.57188100  |
| C           | 3.38643300  | -1.85272600 | 0.68556400  | H                           | -0.52451100 | -3.81662500 | 0.61285400  |
| H           | 4.05038000  | -1.88361000 | -0.17979800 | C                           | 2.96292600  | -4.16039100 | -4.39020500 |
| H           | 3.99886300  | -1.63779700 | 1.57142500  | H                           | 2.23896200  | -4.60994700 | -5.06894200 |
| H           | 2.97657100  | -2.85941600 | 0.83553900  | H                           | 3.71026700  | -3.58985500 | -4.94671100 |
| H           | 0.00985600  | 1.64204400  | 2.91435700  | H                           | 3.46930300  | -4.92882900 | -3.80115700 |
| H           | 1.56534100  | -0.86182800 | 1.38822000  | S                           | 0.43398700  | 1.96053600  | -3.03769800 |
| <b>E-P3</b> |             |             |             | O                           | 0.01102700  | 1.26122800  | -4.26347900 |
| C           | 1.99704100  | -1.69534900 | -1.78688700 | O                           | -0.49995100 | 2.86026400  | -2.33911700 |
| C           | 1.51709000  | -0.53940000 | -2.68975800 | C                           | 1.89756800  | 2.92575000  | -3.46549700 |
| H           | 2.33358700  | -0.26212700 | -3.37075500 | C                           | 2.61854200  | 2.58821100  | -4.61300700 |
| H           | 0.69071900  | -0.87881800 | -3.31696400 | C                           | 2.27895100  | 3.99744800  | -2.65449500 |
| C           | 2.78189200  | -1.12215700 | -0.58866600 | C                           | 3.75294500  | 3.33115400  | -4.94341300 |
| H           | 3.18475400  | -1.93730700 | 0.00911300  | H                           | 2.27267400  | 1.77481700  | -5.24167900 |
| H           | 3.63746100  | -0.56787400 | -0.99132800 | C                           | 3.41426600  | 4.73212000  | -2.99530100 |
| C           | 1.08520300  | 0.68802400  | -1.91689100 | H                           | 1.68499600  | 4.25276400  | -1.78442900 |
| C           | 1.21777500  | 0.86829600  | -0.57274400 | C                           | 4.15175700  | 4.39733600  | -4.13436300 |
| C           | 0.72500400  | 2.07462900  | 0.13444100  | H                           | 4.31902700  | 3.08249300  | -5.83613500 |
| H           | -0.23225400 | 2.46558200  | -0.19065300 | H                           | 3.71931600  | 5.57084900  | -2.37655700 |
| C           | 1.40412900  | 2.72213100  | 1.09191700  | H                           | 5.03376800  | 4.97459700  | -4.39619300 |
| C           | 0.88751600  | 3.95916300  | 1.79271000  | C                           | 2.22166300  | -1.39772900 | 2.45986400  |
| H           | 1.53913000  | 4.81374200  | 1.55340700  | H                           | 2.86219000  | -2.13122400 | 1.96813100  |
| H           | -0.10760100 | 4.21407500  | 1.40757100  | H                           | 2.80697800  | -0.91532700 | 3.25393700  |
| C           | 0.84082000  | 3.79322600  | 3.25055400  | H                           | 1.41128300  | -1.93850800 | 2.96469800  |
| C           | 0.81905900  | 3.64217800  | 4.45120200  | H                           | 2.38226900  | 2.36992900  | 1.41226000  |
| C           | 0.77210600  | 3.44519100  | 5.90111700  | H                           | 0.97165500  | 0.33616000  | 2.00768400  |
| C           | 0.28791600  | 2.03939900  | 6.31445700  | <b>R-INT-2c<sup>H</sup></b> |             |             |             |
| H           | 0.11180400  | 4.20108700  | 6.34873300  | C                           | 2.49002900  | -1.88231000 | -1.39492300 |
| H           | 1.76826300  | 3.62618200  | 6.32871300  | C                           | 2.20815400  | -0.45770900 | -1.93078600 |
| C           | 0.23727800  | 1.85406800  | 7.83535700  | H                           | 3.14338600  | 0.11611000  | -1.91260200 |
| H           | -0.70590000 | 1.86420500  | 5.88418400  | H                           | 1.89461100  | -0.53394400 | -2.97548300 |
| H           | 0.95308000  | 1.28834100  | 5.86971200  | C                           | 2.48206800  | -1.88306200 | 0.15633400  |

|   |             |             |             |                            |             |             |             |
|---|-------------|-------------|-------------|----------------------------|-------------|-------------|-------------|
| H | 2.72982100  | -2.87665900 | 0.52833400  | H                          | 2.12614200  | 2.17427400  | -4.37820800 |
| H | 3.26280200  | -1.19388100 | 0.49806700  | C                          | 3.88942500  | 4.12561200  | -1.51681800 |
| C | 1.14356000  | 0.28717500  | -1.14483100 | H                          | 2.28921200  | 3.39584400  | -0.26124600 |
| C | 0.59892300  | -0.16721700 | 0.01775600  | C                          | 4.42696000  | 4.14441900  | -2.80718700 |
| C | -0.57812000 | 0.36624700  | 0.78172000  | H                          | 4.21578400  | 3.46966500  | -4.84493100 |
| H | -1.18060000 | 1.04808000  | 0.18637900  | H                          | 4.37241300  | 4.67891400  | -0.71710300 |
| C | -0.28738100 | 0.98279000  | 2.16421100  | H                          | 5.33182000  | 4.71093800  | -3.00680500 |
| C | -1.56189600 | 1.69741500  | 2.68594600  | C                          | 0.88335100  | 1.98200700  | 2.11674400  |
| H | -1.77386300 | 2.54687300  | 2.02106600  | H                          | 0.67986900  | 2.77475000  | 1.38987800  |
| H | -2.42638500 | 1.02730900  | 2.60235300  | H                          | 1.02386500  | 2.43892300  | 3.10069500  |
| C | -1.45692900 | 2.17077700  | 4.06637800  | H                          | 1.81603100  | 1.48484300  | 1.83331700  |
| C | -1.36641500 | 2.55480400  | 5.21107600  | Rh                         | -1.52034300 | -1.53036100 | 0.65967000  |
| C | -1.27074900 | 3.06357900  | 6.58071400  | Cl                         | -2.34519500 | -3.79767800 | 0.06834100  |
| C | -1.28341600 | 4.60495800  | 6.65900900  | C                          | -2.37090200 | -1.52281400 | 2.26646300  |
| H | -0.35227500 | 2.68400300  | 7.04986500  | O                          | -2.90232300 | -1.59945400 | 3.28519200  |
| H | -2.10071100 | 2.66273000  | 7.17919700  | C                          | 0.44973000  | -3.34112000 | 2.20927300  |
| C | -1.17807500 | 5.12888100  | 8.09591900  | H                          | -0.17874900 | -4.17369700 | 1.87962000  |
| H | -0.45444500 | 4.99861200  | 6.05752000  | H                          | 1.50107700  | -3.64880300 | 2.21942300  |
| H | -2.20460000 | 4.97699500  | 6.19350100  | H                          | 0.16392900  | -3.10577400 | 3.24223100  |
| C | -1.19033900 | 6.65864500  | 8.17674000  | C                          | -3.14370900 | -0.39856700 | -3.43916700 |
| H | -2.00693100 | 4.72337500  | 8.69219000  | C                          | -2.99839000 | -1.38660600 | -2.29144200 |
| H | -0.25705400 | 4.74480800  | 8.55566900  | C                          | -3.93659300 | 0.25441100  | -0.82817200 |
| H | -1.11140000 | 7.00483100  | 9.21237200  | C                          | -4.06659100 | 1.20466300  | -2.01288400 |
| H | -0.35382400 | 7.09127900  | 7.61628200  | O                          | -2.83695400 | -0.65019000 | -1.04862700 |
| H | -2.11553000 | 7.07018800  | 7.75780000  | O                          | -4.25053300 | 0.47575800  | -3.21684900 |
| C | 1.11917200  | -1.42743500 | 0.60566100  | H                          | -3.71652000 | 0.79605800  | 0.09516900  |
| C | 0.23717400  | -2.15358000 | 1.33941600  | H                          | -4.85732700 | -0.33095300 | -0.69851800 |
| C | 1.41540300  | -2.85575500 | -1.92025700 | H                          | -4.94475200 | 1.84602800  | -1.88548500 |
| O | 0.46221000  | -2.53676100 | -2.59657000 | H                          | -3.16864200 | 1.83884500  | -2.07474200 |
| O | 1.67158300  | -4.10652700 | -1.51020900 | H                          | -3.88019900 | -2.03134900 | -2.20170100 |
| C | 3.86646900  | -2.33699400 | -1.89646300 | H                          | -2.10783100 | -2.00608600 | -2.40405500 |
| O | 4.85056600  | -2.47050100 | -1.20462900 | H                          | -2.21554500 | 0.17860700  | -3.55666500 |
| O | 3.84809700  | -2.53318300 | -3.22908300 | H                          | -3.34804000 | -0.93791100 | -4.36912700 |
| C | 0.70037500  | -5.10695100 | -1.90085300 | H                          | -0.01799200 | 0.19256200  | 2.87388900  |
| H | 0.60361600  | -5.12866800 | -2.98850700 | <b>R-TS2cc<sup>H</sup></b> |             |             |             |
| H | 1.09834100  | -6.05115200 | -1.53050700 | C                          | 0.84485100  | 0.50998400  | -1.04589000 |
| H | -0.26722600 | -4.88446400 | -1.44515800 | C                          | 0.43345200  | -0.88519700 | -0.89203000 |
| C | 5.09646500  | -2.94872400 | -3.81395500 | Rh                         | -1.94678400 | 0.45311100  | -1.74762200 |
| H | 4.89725200  | -3.06079100 | -4.87910400 | Cl                         | -3.70006500 | -0.97225600 | -2.87824900 |
| H | 5.86850200  | -2.19487600 | -3.64254900 | C                          | 1.46096200  | -1.99255200 | -0.92982200 |
| H | 5.42275000  | -3.89683500 | -3.38029600 | C                          | 2.14558000  | 0.80607800  | -1.32584300 |
| S | 0.59254300  | 1.78393300  | -1.97859600 | H                          | 1.18162700  | -2.79971000 | -0.24785100 |
| O | 0.05598500  | 1.38740500  | -3.29590000 | H                          | 1.49413800  | -2.44610600 | -1.92821700 |
| O | -0.23073700 | 2.61182500  | -1.07440400 | H                          | 3.95316000  | -1.93958300 | 3.27833400  |
| C | 2.11613700  | 2.69984400  | -2.29590000 | C                          | 2.90723000  | -2.15341600 | 3.04602300  |
| C | 2.63877900  | 2.71477400  | -3.58995800 | O                          | 2.72717900  | -2.29066600 | 1.62558000  |
| C | 2.72536400  | 3.40447700  | -1.25414600 | H                          | 2.60560600  | -3.10910300 | 3.47367600  |
| C | 3.80198600  | 3.44481000  | -3.84132900 | H                          | 2.28475100  | -1.34427700 | 3.43568900  |

|   |             |             |             |                              |             |             |             |
|---|-------------|-------------|-------------|------------------------------|-------------|-------------|-------------|
| C | 3.06219200  | -1.21182400 | 0.88755500  | H                            | -4.49776400 | 0.80913300  | 2.30425100  |
| C | 2.88984200  | -1.50759300 | -0.61019100 | C                            | -6.99281700 | -0.01588100 | 3.23223500  |
| O | 3.45045800  | -0.17228200 | 1.37392000  | H                            | -6.83683000 | 1.25123500  | 1.48653400  |
| C | 3.88995400  | -2.61100000 | -0.99970800 | H                            | -7.02629700 | -0.45341300 | 1.11352700  |
| O | 3.65875500  | -3.52115400 | -1.76322500 | H                            | -8.07911200 | 0.08529300  | 3.32051800  |
| O | 5.08737600  | -2.40036500 | -0.42110400 | H                            | -6.72538900 | -1.02717700 | 3.55892600  |
| C | 6.12166300  | -3.34070400 | -0.76810200 | H                            | -6.53503300 | 0.69063400  | 3.93403900  |
| H | 6.30316900  | -3.32584500 | -1.84507400 | H                            | -0.12091200 | -0.11667800 | 1.58781900  |
| H | 7.00739900  | -3.01427000 | -0.22439600 | H                            | -1.46176700 | 0.79479400  | 2.32353000  |
| H | 5.83381500  | -4.35119300 | -0.46878000 | C                            | -2.97284700 | 2.03037600  | -2.41163600 |
| C | -0.91403500 | -1.14942700 | -0.87022100 | O                            | -3.64679000 | 2.90435600  | -2.71756700 |
| C | -0.27950000 | 1.50036200  | -0.86803400 | C                            | -0.51920400 | 1.60658900  | -4.51041100 |
| H | -0.09717500 | 2.41819400  | -1.42422900 | C                            | 0.63963000  | 1.46505300  | -5.48715400 |
| C | 3.22244100  | -0.25115100 | -1.44826000 | C                            | 0.37509500  | -0.85142400 | -5.51770700 |
| H | 3.33606500  | -0.55949700 | -2.49652000 | C                            | -0.79472600 | -0.75452800 | -4.54867600 |
| H | 4.18583800  | 0.15558400  | -1.14098900 | O                            | 0.47702300  | 0.31902300  | -6.31498200 |
| S | 2.71070200  | 2.46441300  | -1.73751100 | O                            | -0.62952500 | 0.41029500  | -3.70539800 |
| O | 1.80041300  | 3.06356300  | -2.74201800 | H                            | 1.31129200  | -1.01613500 | -4.95821000 |
| O | 4.14480200  | 2.34317700  | -2.05630200 | H                            | 0.22483600  | -1.69419800 | -6.19980200 |
| C | 2.57116900  | 3.48633300  | -0.25507600 | H                            | -1.74814200 | -0.67609800 | -5.08196900 |
| C | 1.91292300  | 4.71292700  | -0.35374200 | H                            | -0.84303900 | -1.61556200 | -3.88164900 |
| C | 3.19493300  | 3.08308700  | 0.92916300  | H                            | 0.68022300  | 2.33625800  | -6.14759400 |
| C | 1.87024800  | 5.55098300  | 0.76250200  | H                            | 1.58171200  | 1.41110100  | -4.92320700 |
| H | 1.45134900  | 4.99506100  | -1.29361000 | H                            | -0.33030500 | 2.43201400  | -3.82473000 |
| C | 3.13619800  | 3.92675100  | 2.03867300  | H                            | -1.46484700 | 1.75991600  | -5.04882500 |
| H | 3.69075100  | 2.12053300  | 0.99277800  | H                            | 0.46515000  | 2.13241700  | 1.05668900  |
| C | 2.47837800  | 5.15768800  | 1.95610400  | <b>E-INT-2c<sup>BH</sup></b> |             |             |             |
| H | 1.36400200  | 6.50956100  | 0.69724500  | C                            | 3.78545700  | -1.84034700 | -1.26755000 |
| H | 3.60906200  | 3.62277100  | 2.96779500  | C                            | 3.91256500  | -0.37442200 | -1.73940600 |
| H | 2.44157400  | 5.81094000  | 2.82319100  | H                            | 4.84756800  | 0.05717200  | -1.36380700 |
| C | -0.50325900 | 1.82831400  | 0.63573000  | H                            | 3.97236400  | -0.35625900 | -2.83084900 |
| C | -0.96333300 | 0.54759200  | 1.37915400  | C                            | 3.37855100  | -1.87712800 | 0.22274800  |
| C | -1.48082400 | 2.98960200  | 0.83345700  | H                            | 3.35060400  | -2.90972000 | 0.56538300  |
| H | -1.54481100 | 3.26838000  | 1.89076900  | H                            | 4.16808500  | -1.37174600 | 0.79180200  |
| H | -1.14778700 | 3.87031700  | 0.27569000  | C                            | 2.74466400  | 0.46841800  | -1.27411900 |
| H | -2.48731600 | 2.73240600  | 0.48811900  | C                            | 1.85731000  | 0.08393300  | -0.32137400 |
| C | -1.47757200 | -2.54357700 | -0.82339600 | C                            | 0.64029600  | 0.82844700  | 0.11341200  |
| H | -1.11300700 | -3.13293500 | -1.67307200 | H                            | 0.13770500  | 1.39778000  | -0.66068700 |
| H | -1.17397000 | -3.06833700 | 0.09268600  | C                            | 0.64768300  | 1.49550600  | 1.45911200  |
| H | -2.56569400 | -2.53130000 | -0.88148900 | C                            | -0.11479500 | 2.84354200  | 1.43232200  |
| C | -1.93818400 | -0.08696800 | 0.44156700  | H                            | 0.53342800  | 3.54988000  | 0.89854900  |
| C | -3.10232700 | 0.21663100  | -0.01853600 | H                            | -1.01609800 | 2.72615300  | 0.82381800  |
| C | -4.55649500 | 0.36978900  | 0.17943000  | C                            | -0.47144000 | 3.36246200  | 2.75322200  |
| C | -5.00687900 | 0.10923200  | 1.62857400  | C                            | -0.77548500 | 3.78106000  | 3.84922100  |
| H | -5.06100700 | -0.31164600 | -0.51745100 | C                            | -1.09825300 | 4.33536100  | 5.16629400  |
| H | -4.85301200 | 1.37909300  | -0.13920600 | C                            | -0.04621700 | 5.34285000  | 5.67697400  |
| C | -6.52558200 | 0.24469200  | 1.79702200  | H                            | -1.20148100 | 3.51793500  | 5.89340600  |
| H | -4.69020600 | -0.89878300 | 1.92518700  | H                            | -2.08053800 | 4.82637500  | 5.12467900  |

|    |             |             |             |                             |             |             |             |
|----|-------------|-------------|-------------|-----------------------------|-------------|-------------|-------------|
| C  | -0.39546400 | 5.91548500  | 7.05545500  | C                           | -3.49479100 | 0.74364900  | -0.34467200 |
| H  | 0.93179400  | 4.84732600  | 5.71573800  | C                           | -3.38933800 | 1.29659200  | 1.96415600  |
| H  | 0.04966900  | 6.15686900  | 4.94798400  | C                           | -4.21966400 | 2.54353000  | 1.68551200  |
| C  | 0.64365300  | 6.91876100  | 7.56576300  | O                           | -2.62596000 | 0.93970900  | 0.79411100  |
| H  | -1.38061600 | 6.39955000  | 7.00844100  | O                           | -5.07057900 | 2.35077400  | 0.56502800  |
| H  | -0.49552500 | 5.09203800  | 7.77591200  | H                           | -2.67022900 | 1.48159700  | 2.76515100  |
| H  | 0.36911400  | 7.31121500  | 8.55011200  | H                           | -4.04354800 | 0.45597900  | 2.23640300  |
| H  | 1.63195600  | 6.45417300  | 7.65625700  | H                           | -4.86277700 | 2.76692800  | 2.54237000  |
| H  | 0.74063200  | 7.77014800  | 6.88283600  | H                           | -3.54846600 | 3.40165900  | 1.52039700  |
| C  | 2.04842900  | -1.17962700 | 0.40051300  | H                           | -4.15556700 | -0.10996900 | -0.14449000 |
| C  | 1.01468400  | -1.62021700 | 1.15505800  | H                           | -2.84986800 | 0.49320100  | -1.18700800 |
| C  | 2.74120700  | -2.56678900 | -2.14025900 | H                           | -3.63765200 | 2.83535100  | -0.86276100 |
| O  | 2.23078800  | -2.11563300 | -3.13985200 | H                           | -5.01972200 | 1.84672900  | -1.40330700 |
| O  | 2.47168000  | -3.78843500 | -1.64320200 | C                           | 1.98793900  | 1.60185400  | 2.19770400  |
| C  | 5.14149900  | -2.53918800 | -1.43820600 | H                           | 1.84031200  | 2.06524200  | 3.17632300  |
| O  | 5.86816500  | -2.88036500 | -0.53185700 | H                           | 2.45616000  | 0.62670200  | 2.33451700  |
| O  | 5.44147900  | -2.69844200 | -2.74221300 | H                           | 2.66050600  | 2.23272300  | 1.60822200  |
| C  | 1.44242000  | -4.52079100 | -2.33817400 | H                           | 0.00380900  | 0.81064800  | 2.20725400  |
| H  | 1.69965100  | -4.63205100 | -3.39388300 | <b>E-TS2cc<sup>BH</sup></b> |             |             |             |
| H  | 1.39531100  | -5.49296500 | -1.84778700 | C                           | 3.65016700  | -1.99457500 | -1.05993300 |
| H  | 0.49000800  | -3.99364000 | -2.24597200 | C                           | 3.82064200  | -0.45980100 | -1.09615200 |
| C  | 6.71244100  | -3.31494800 | -3.01649300 | H                           | 4.67047700  | -0.16358200 | -0.47021700 |
| H  | 6.78168600  | -3.37135300 | -4.10229800 | H                           | 4.05749500  | -0.15441500 | -2.11855100 |
| H  | 7.52600900  | -2.70983100 | -2.60936200 | C                           | 3.00707200  | -2.42242600 | 0.27816200  |
| H  | 6.75637300  | -4.31292800 | -2.57392700 | H                           | 2.93903500  | -3.50787100 | 0.31112200  |
| S  | 2.68690400  | 2.07982700  | -2.05919700 | H                           | 3.68916600  | -2.11872300 | 1.08159400  |
| O  | 1.76510500  | 2.96523300  | -1.31458200 | C                           | 2.57329700  | 0.25191500  | -0.62122600 |
| O  | 4.08253200  | 2.51679100  | -2.25196300 | C                           | 1.55847600  | -0.35159800 | 0.04709500  |
| C  | 1.99030700  | 1.78032900  | -3.69621500 | C                           | 0.28960400  | 0.31335300  | 0.46108500  |
| C  | 0.94326900  | 0.87429800  | -3.87857100 | H                           | -0.17174100 | 0.99205900  | -0.24623600 |
| C  | 2.50268800  | 2.52976100  | -4.75774900 | C                           | 0.01301800  | 0.55850800  | 1.83797300  |
| C  | 0.39553200  | 0.72909500  | -5.15376700 | C                           | -0.92028500 | 1.74019500  | 2.11859700  |
| H  | 0.57919300  | 0.26471900  | -3.05812700 | H                           | -0.28149600 | 2.62954200  | 2.00828600  |
| C  | 1.93912300  | 2.38058000  | -6.02466900 | H                           | -1.67266900 | 1.80197200  | 1.32797600  |
| H  | 3.33354000  | 3.20533700  | -4.58522200 | C                           | -1.56197700 | 1.74154000  | 3.43337700  |
| C  | 0.88651200  | 1.48343000  | -6.22154200 | C                           | -2.09498000 | 1.74523500  | 4.52138000  |
| H  | -0.40838900 | 0.01661700  | -5.31044300 | C                           | -2.70517800 | 1.77515000  | 5.85269000  |
| H  | 2.32772100  | 2.95823300  | -6.85813400 | C                           | -1.74067000 | 2.25622800  | 6.95767600  |
| H  | 0.45555500  | 1.36394000  | -7.21147400 | H                           | -3.07772200 | 0.77316000  | 6.10680900  |
| Rh | -0.66127800 | -0.50001100 | 1.06313700  | H                           | -3.58837700 | 2.42856600  | 5.83144300  |
| Cl | -1.21574800 | -1.72601900 | -0.92847000 | C                           | -2.39464500 | 2.27548500  | 8.34399600  |
| C  | -1.78193000 | -1.66493900 | 2.25677900  | H                           | -0.85936900 | 1.60280500  | 6.97084800  |
| O  | -2.42963400 | -2.34132200 | 2.91593800  | H                           | -1.37758100 | 3.25913300  | 6.70160700  |
| C  | 0.98066500  | -2.89233900 | 1.94637200  | C                           | -1.44297300 | 2.74912700  | 9.44698700  |
| H  | 0.22030000  | -3.57015100 | 1.54157500  | H                           | -3.27982400 | 2.92565700  | 8.31880700  |
| H  | 1.94204600  | -3.41468700 | 1.92713800  | H                           | -2.76339000 | 1.26903400  | 8.58511400  |
| H  | 0.72772600  | -2.70466800 | 2.99644100  | H                           | -1.93623400 | 2.75234800  | 10.42417800 |
| C  | -4.30892200 | 2.00574800  | -0.58690200 | H                           | -0.56491900 | 2.09755100  | 9.51957100  |



|    |             |             |             |                             |             |             |             |
|----|-------------|-------------|-------------|-----------------------------|-------------|-------------|-------------|
| H  | -1.08439100 | 3.76593000  | 9.25162300  | H                           | -4.32893600 | 2.29394100  | 1.70734100  |
| C  | 1.65376200  | -1.76354600 | 0.43690400  | H                           | -4.43062600 | -0.59934600 | -0.94559500 |
| C  | 0.53432800  | -2.37176400 | 0.89581000  | H                           | -2.97239500 | 0.24537900  | -1.50397600 |
| C  | 2.78538200  | -2.43578200 | -2.26008600 | H                           | -3.91443200 | 2.42268700  | -0.71440800 |
| O  | 2.46929500  | -1.72687700 | -3.18753700 | H                           | -5.11498900 | 1.63694700  | -1.77245000 |
| O  | 2.43851600  | -3.73066400 | -2.14728700 | H                           | -0.95813300 | -0.70411500 | 2.30541400  |
| C  | 5.03211300  | -2.65221600 | -1.18525600 | C                           | 1.04988000  | 0.31205200  | 2.91736400  |
| O  | 5.59643800  | -3.26114200 | -0.30376500 | H                           | 1.77851800  | 1.13017400  | 2.85554500  |
| O  | 5.56071300  | -2.43584200 | -2.40551500 | H                           | 0.59287700  | 0.33372000  | 3.90837000  |
| C  | 1.55652300  | -4.22181100 | -3.17818100 | H                           | 1.57924500  | -0.62858700 | 2.77951800  |
| H  | 1.99901800  | -4.06454300 | -4.16433400 | <b>S-INT-2c<sup>H</sup></b> |             |             |             |
| H  | 1.43584300  | -5.28565000 | -2.97428500 | C                           | 0.74282400  | 0.52497200  | -0.90763300 |
| H  | 0.59703500  | -3.70300800 | -3.11693600 | C                           | 0.36574800  | -0.88779400 | -0.77441100 |
| C  | 6.87565000  | -2.97978900 | -2.61835100 | Rh                          | -2.01041300 | 0.42604300  | -1.68039000 |
| H  | 7.13826400  | -2.71712100 | -3.64256800 | Cl                          | -3.67782100 | -0.97668200 | -2.96516800 |
| H  | 7.58777000  | -2.54351300 | -1.91381800 | C                           | 1.41491600  | -1.97445500 | -0.79535300 |
| H  | 6.86638300  | -4.06450800 | -2.48781100 | C                           | 2.02326300  | 0.83994300  | -1.26558300 |
| S  | 2.58694500  | 2.01093400  | -0.97007400 | H                           | 1.16517700  | -2.76120900 | -0.07815900 |
| O  | 1.50860500  | 2.67729400  | -0.20767900 | H                           | 1.43624100  | -2.46507800 | -1.77617800 |
| O  | 3.97444900  | 2.47742000  | -0.78911200 | H                           | 3.95462400  | -1.77251100 | 3.35409100  |
| C  | 2.20106200  | 2.13682000  | -2.72696900 | C                           | 2.88983900  | -1.91808400 | 3.15765800  |
| C  | 1.19277100  | 1.35441200  | -3.29524700 | O                           | 2.66198000  | -2.11092800 | 1.74996600  |
| C  | 2.90629900  | 3.08084200  | -3.47617400 | H                           | 2.52988000  | -2.82638400 | 3.63993200  |
| C  | 0.88435200  | 1.53497400  | -4.64381900 | H                           | 2.33997900  | -1.04590000 | 3.51907900  |
| H  | 0.67592200  | 0.59400800  | -2.71802100 | C                           | 3.05496900  | -1.09685200 | 0.95238100  |
| C  | 2.58024400  | 3.25638100  | -4.82096800 | C                           | 2.83673800  | -1.44770500 | -0.52779300 |
| H  | 3.69866500  | 3.65366400  | -3.00660400 | O                           | 3.53097600  | -0.06674800 | 1.37869000  |
| C  | 1.57045600  | 2.48617500  | -5.40243900 | C                           | 3.85210900  | -2.53912600 | -0.91575100 |
| H  | 0.11367800  | 0.92184700  | -5.10041100 | O                           | 3.62824400  | -3.45543900 | -1.67400200 |
| H  | 3.11993100  | 3.98809800  | -5.41484300 | O                           | 5.04919100  | -2.31384900 | -0.34220100 |
| H  | 1.32463900  | 2.62010500  | -6.45202700 | C                           | 6.09179400  | -3.24505600 | -0.69025500 |
| Rh | -1.15427500 | -1.26838600 | 0.80118900  | H                           | 6.27178900  | -3.22862300 | -1.76741700 |
| Cl | -1.26038300 | -1.81069500 | -1.61677300 | H                           | 6.97502100  | -2.91048100 | -0.14741900 |
| C  | -2.36420300 | -2.71694700 | 1.28969000  | H                           | 5.81329600  | -4.25797600 | -0.39045900 |
| O  | -3.09405100 | -3.54997500 | 1.58303100  | C                           | -0.97295200 | -1.18976100 | -0.83449200 |
| C  | 0.43829400  | -3.79377200 | 1.35965400  | C                           | -0.40637600 | 1.47067000  | -0.67878800 |
| H  | -0.20408900 | -4.37532200 | 0.68804900  | H                           | -0.24074200 | 2.43264000  | -1.15795700 |
| H  | 1.41573200  | -4.28375100 | 1.39530600  | C                           | 3.10637500  | -0.21280900 | -1.41899600 |
| H  | 0.00186300  | -3.85188700 | 2.36332900  | H                           | 3.16929500  | -0.54899700 | -2.46199900 |
| C  | -4.58710100 | 1.55526900  | -0.81762200 | H                           | 4.08395100  | 0.20521600  | -1.17817700 |
| C  | -3.77958500 | 0.26754100  | -0.77201900 | S                           | 2.53768000  | 2.45910500  | -1.86496100 |
| C  | -4.15811900 | 0.14848100  | 1.56837900  | O                           | 1.40470600  | 3.13322900  | -2.54007700 |
| C  | -4.97711000 | 1.43090900  | 1.48426400  | O                           | 3.77314900  | 2.21240700  | -2.63209100 |
| O  | -3.15908600 | 0.13422400  | 0.52810500  | C                           | 2.97794800  | 3.51566500  | -0.46726600 |
| O  | -5.57716600 | 1.57481400  | 0.20555200  | C                           | 2.48262700  | 4.82114600  | -0.45678600 |
| H  | -3.62340500 | 0.08918000  | 2.51816000  | C                           | 3.86064400  | 3.06314100  | 0.51616500  |
| H  | -4.81094700 | -0.72846100 | 1.45110700  | C                           | 2.87750300  | 5.68872200  | 0.56314500  |
| H  | -5.78825900 | 1.40890000  | 2.21872700  | H                           | 1.80185400  | 5.13856600  | -1.23865600 |

|   |             |             |             |                            |             |             |             |
|---|-------------|-------------|-------------|----------------------------|-------------|-------------|-------------|
| C | 4.23973000  | 3.93817600  | 1.53431000  | H                          | 0.08066500  | 2.50527000  | 2.67055800  |
| H | 4.21638600  | 2.03952600  | 0.51663900  | H                          | -1.60774800 | 2.35192400  | 0.85064100  |
| C | 3.75367900  | 5.24814600  | 1.55705200  | <b>S-TS2cc<sup>H</sup></b> |             |             |             |
| H | 2.50029000  | 6.70701100  | 0.57944600  | C                          | 0.74282400  | 0.52497200  | -0.90763300 |
| H | 4.91588700  | 3.59362000  | 2.31095800  | C                          | 0.36574800  | -0.88779400 | -0.77441100 |
| H | 4.05671400  | 5.92474000  | 2.35094900  | Rh                         | -2.01041300 | 0.42604300  | -1.68039000 |
| C | -0.73422400 | 1.68787100  | 0.83025400  | Cl                         | -3.67782100 | -0.97668200 | -2.96516800 |
| C | -1.19064600 | 0.36381600  | 1.48718400  | C                          | 1.41491600  | -1.97445500 | -0.79535300 |
| C | -1.49257900 | -2.60071500 | -0.87750100 | C                          | 2.02326300  | 0.83994300  | -1.26558300 |
| H | -1.07351300 | -3.13926700 | -1.73598800 | H                          | 1.16517700  | -2.76120900 | -0.07815900 |
| H | -1.21170200 | -3.15943400 | 0.02578000  | H                          | 1.43624100  | -2.46507800 | -1.77617800 |
| H | -2.57719600 | -2.61738000 | -0.98244100 | H                          | 3.95462400  | -1.77251100 | 3.35409100  |
| C | -2.10332900 | -0.23332600 | 0.47303900  | C                          | 2.88983900  | -1.91808400 | 3.15765800  |
| C | -3.24980400 | 0.06808900  | -0.02462600 | O                          | 2.66198000  | -2.11092800 | 1.74996600  |
| C | -4.71258100 | 0.20449000  | 0.10024900  | H                          | 2.52988000  | -2.82638400 | 3.63993200  |
| C | -5.24648700 | -0.16375000 | 1.49684500  | H                          | 2.33997900  | -1.04590000 | 3.51907900  |
| H | -5.17544700 | -0.41939400 | -0.67488700 | C                          | 3.05496900  | -1.09685200 | 0.95238100  |
| H | -4.99074600 | 1.23733100  | -0.15448700 | C                          | 2.83673800  | -1.44770500 | -0.52779300 |
| C | -6.77172900 | -0.02668100 | 1.58638500  | O                          | 3.53097600  | -0.06674800 | 1.37869000  |
| H | -4.95255900 | -1.19450400 | 1.73199100  | C                          | 3.85210900  | -2.53912600 | -0.91575100 |
| H | -4.77427200 | 0.47747800  | 2.25294600  | O                          | 3.62824400  | -3.45543900 | -1.67400200 |
| C | -7.32452800 | -0.38743500 | 2.96850500  | O                          | 5.04919100  | -2.31384900 | -0.34220100 |
| H | -7.05857000 | 1.00306200  | 1.33378900  | C                          | 6.09179400  | -3.24505600 | -0.69025500 |
| H | -7.23499900 | -0.66742800 | 0.82476300  | H                          | 6.27178900  | -3.22862300 | -1.76741700 |
| H | -8.41362000 | -0.28266300 | 2.99994200  | H                          | 6.97502100  | -2.91048100 | -0.14741900 |
| H | -7.08212300 | -1.42236700 | 3.23511500  | H                          | 5.81329600  | -4.25797600 | -0.39045900 |
| H | -6.90554000 | 0.26162000  | 3.74597100  | C                          | -0.97295200 | -1.18976100 | -0.83449200 |
| H | -0.34139700 | -0.28975300 | 1.70835800  | C                          | -0.40637600 | 1.47067000  | -0.67878800 |
| H | -1.73841000 | 0.56015500  | 2.41572100  | H                          | -0.24074200 | 2.43264000  | -1.15795700 |
| C | -3.04492900 | 2.02734900  | -2.26921700 | C                          | 3.10637500  | -0.21280900 | -1.41899600 |
| O | -3.72270800 | 2.91890100  | -2.50948000 | H                          | 3.16929500  | -0.54899700 | -2.46199900 |
| C | -0.73738000 | 1.66444500  | -4.44800300 | H                          | 4.08395100  | 0.20521600  | -1.17817700 |
| C | 0.39576700  | 1.66786400  | -5.46523500 | S                          | 2.53768000  | 2.45910500  | -1.86496100 |
| C | 0.51792200  | -0.65553200 | -5.39351600 | O                          | 1.40470600  | 3.13322900  | -2.54007700 |
| C | -0.62129400 | -0.71197900 | -4.38544000 | O                          | 3.77314900  | 2.21240700  | -2.63209100 |
| O | 0.39138600  | 0.47531100  | -6.24189500 | C                          | 2.97794800  | 3.51566500  | -0.46726600 |
| O | -0.63565000 | 0.50092800  | -3.59403400 | C                          | 2.48262700  | 4.82114600  | -0.45678600 |
| H | 1.48637500  | -0.63112300 | -4.86635600 | C                          | 3.86064400  | 3.06314100  | 0.51616500  |
| H | 0.49154200  | -1.54385400 | -6.03264600 | C                          | 2.87750300  | 5.68872200  | 0.56314500  |
| H | -1.59055000 | -0.82477600 | -4.88153600 | H                          | 1.80185400  | 5.13856600  | -1.23865600 |
| H | -0.49108900 | -1.53568300 | -3.68227500 | C                          | 4.23973000  | 3.93817600  | 1.53431000  |
| H | 0.26767900  | 2.50373900  | -6.15978400 | H                          | 4.21638600  | 2.03952600  | 0.51663900  |
| H | 1.35549300  | 1.78931500  | -4.94338400 | C                          | 3.75367900  | 5.24814600  | 1.55705200  |
| H | -0.65675400 | 2.53371300  | -3.79571200 | H                          | 2.50029000  | 6.70701100  | 0.57944600  |
| H | -1.71260100 | 1.64533500  | -4.95306900 | H                          | 4.91588700  | 3.59362000  | 2.31095800  |
| C | 0.39335900  | 2.35385200  | 1.63081600  | H                          | 4.05671400  | 5.92474000  | 2.35094900  |
| H | 1.30254800  | 1.74563400  | 1.63522700  | C                          | -0.73422400 | 1.68787100  | 0.83025400  |
| H | 0.64771200  | 3.33216400  | 1.21563700  | C                          | -1.19064600 | 0.36381600  | 1.48718400  |

|                              |             |             |             |   |             |             |             |
|------------------------------|-------------|-------------|-------------|---|-------------|-------------|-------------|
| C                            | -1.49257900 | -2.60071500 | -0.87750100 | H | 2.87190300  | -3.17682900 | 0.46662900  |
| H                            | -1.07351300 | -3.13926700 | -1.73598800 | H | 3.47666200  | -1.84543300 | 1.44166500  |
| H                            | -1.21170200 | -3.15943400 | 0.02578000  | C | 2.30928700  | 0.65368600  | -0.01428400 |
| H                            | -2.57719600 | -2.61738000 | -0.98244100 | C | 1.31232000  | -0.07972500 | 0.54239600  |
| C                            | -2.10332900 | -0.23332600 | 0.47303900  | C | -0.00703900 | 0.41585300  | 1.01995100  |
| C                            | -3.24980400 | 0.06808900  | -0.02462600 | H | -0.38433700 | 1.29944400  | 0.51958800  |
| C                            | -4.71258100 | 0.20449000  | 0.10024900  | C | -0.33890900 | 0.36092200  | 2.48361900  |
| C                            | -5.24648700 | -0.16375000 | 1.49684500  | C | 0.78740400  | -0.00559700 | 3.49518900  |
| H                            | -5.17544700 | -0.41939400 | -0.67488700 | H | 0.31408100  | -0.19189000 | 4.46875600  |
| H                            | -4.99074600 | 1.23733100  | -0.15448700 | H | 1.26131900  | -0.94383300 | 3.19352200  |
| C                            | -6.77172900 | -0.02668100 | 1.58638500  | C | 1.78452000  | 1.05586100  | 3.61684900  |
| H                            | -4.95255900 | -1.19450400 | 1.73199100  | C | 2.59351800  | 1.95425800  | 3.67841400  |
| H                            | -4.77427200 | 0.47747800  | 2.25294600  | C | 3.54223100  | 3.06810300  | 3.69977500  |
| C                            | -7.32452800 | -0.38743500 | 2.96850500  | C | 2.84401900  | 4.44476700  | 3.68452800  |
| H                            | -7.05857000 | 1.00306200  | 1.33378900  | H | 4.18968900  | 2.99067600  | 2.81757400  |
| H                            | -7.23499900 | -0.66742800 | 0.82476300  | H | 4.18966300  | 2.98830800  | 4.58412000  |
| H                            | -8.41362000 | -0.28266300 | 2.99994200  | C | 3.84136300  | 5.60781200  | 3.65197800  |
| H                            | -7.08212300 | -1.42236700 | 3.23511500  | H | 2.19030900  | 4.49064100  | 2.80611700  |
| H                            | -6.90554000 | 0.26162000  | 3.74597100  | H | 2.19711300  | 4.53138000  | 4.56751000  |
| H                            | -0.34139700 | -0.28975300 | 1.70835800  | C | 3.15860500  | 6.97921700  | 3.64399400  |
| H                            | -1.73841000 | 0.56015500  | 2.41572100  | H | 4.51447800  | 5.53858100  | 4.51820500  |
| C                            | -3.04492900 | 2.02734900  | -2.26921700 | H | 4.47565100  | 5.50896900  | 2.76127200  |
| O                            | -3.72270800 | 2.91890100  | -2.50948000 | H | 3.89243200  | 7.79164800  | 3.61553000  |
| C                            | -0.73738000 | 1.66444500  | -4.44800300 | H | 2.50554700  | 7.08905000  | 2.77104700  |
| C                            | 0.39576700  | 1.66786400  | -5.46523500 | H | 2.54078500  | 7.12064200  | 4.53846100  |
| C                            | 0.51792200  | -0.65553200 | -5.39351600 | C | 1.47060800  | -1.53414900 | 0.70111300  |
| C                            | -0.62129400 | -0.71197900 | -4.38544000 | C | 0.34594500  | -2.25259100 | 0.92289500  |
| O                            | 0.39138600  | 0.47531100  | -6.24189500 | C | 2.78160800  | -1.80313400 | -1.96052000 |
| O                            | -0.63565000 | 0.50092800  | -3.59403400 | O | 2.44212100  | -1.00461400 | -2.80257200 |
| H                            | 1.48637500  | -0.63112300 | -4.86635600 | O | 2.54034400  | -3.12609300 | -2.03722800 |
| H                            | 0.49154200  | -1.54385400 | -6.03264600 | C | 4.98034700  | -2.01514300 | -0.79038400 |
| H                            | -1.59055000 | -0.82477600 | -4.88153600 | O | 5.54023700  | -2.68786500 | 0.04611300  |
| H                            | -0.49108900 | -1.53568300 | -3.68227500 | O | 5.55233000  | -1.62687000 | -1.94738000 |
| H                            | 0.26767900  | 2.50373900  | -6.15978400 | C | 1.75273200  | -3.53936200 | -3.17168900 |
| H                            | 1.35549300  | 1.78931500  | -4.94338400 | H | 2.23675100  | -3.23698800 | -4.10310700 |
| H                            | -0.65675400 | 2.53371300  | -3.79571200 | H | 1.69172700  | -4.62544600 | -3.10391000 |
| H                            | -1.71260100 | 1.64533500  | -4.95306900 | H | 0.75852700  | -3.09002000 | -3.11412800 |
| C                            | 0.39335900  | 2.35385200  | 1.63081600  | C | 6.90779400  | -2.06643900 | -2.14716300 |
| H                            | 1.30254800  | 1.74563400  | 1.63522700  | H | 7.20013100  | -1.67877400 | -3.12247600 |
| H                            | 0.64771200  | 3.33216400  | 1.21563700  | H | 7.55765500  | -1.66886300 | -1.36389000 |
| H                            | 0.08066500  | 2.50527000  | 2.67055800  | H | 6.96164300  | -3.15758100 | -2.13263600 |
| H                            | -1.60774800 | 2.35192400  | 0.85064100  | S | 2.26107900  | 2.44185900  | -0.18200200 |
| <b>Z-INT-2c<sup>pH</sup></b> |             |             |             | O | 1.03514800  | 3.00171700  | 0.42186100  |
| C                            | 3.55280100  | -1.46282100 | -0.66891700 | O | 3.57271000  | 2.95469800  | 0.26785800  |
| C                            | 3.61983800  | 0.07183600  | -0.50361100 | C | 2.17077700  | 2.70756500  | -1.96440200 |
| H                            | 4.41208300  | 0.33065600  | 0.20896900  | C | 1.20823200  | 2.04050200  | -2.72573500 |
| H                            | 3.89534500  | 0.51718900  | -1.46291000 | C | 3.04293200  | 3.63606300  | -2.53432600 |
| C                            | 2.86810100  | -2.09299800 | 0.56377100  | C | 1.11964600  | 2.32077900  | -4.08876000 |

|                             |             |             |             |    |             |             |             |
|-----------------------------|-------------|-------------|-------------|----|-------------|-------------|-------------|
| H                           | 0.56001500  | 1.29428000  | -2.27730600 | H  | 2.07320700  | -0.22535700 | 2.66899900  |
| C                           | 2.93686100  | 3.91277800  | -3.89798500 | H  | 2.19136700  | 1.52710400  | 2.70616100  |
| H                           | 3.78789200  | 4.12050900  | -1.91255000 | C  | 1.10909700  | 0.67458500  | 4.30643100  |
| C                           | 1.97686600  | 3.25738300  | -4.67193600 | C  | 0.78340400  | 0.65342200  | 5.47225700  |
| H                           | 0.38615700  | 1.79856200  | -4.69510000 | C  | 0.37716800  | 0.61959800  | 6.87815400  |
| H                           | 3.60750200  | 4.63441300  | -4.35503700 | C  | -1.09413600 | 0.19856600  | 7.07918100  |
| H                           | 1.90197200  | 3.47005000  | -5.73457100 | H  | 0.53761800  | 1.60861900  | 7.32915600  |
| Rh                          | -1.36562600 | -1.17923600 | 0.93203900  | H  | 1.03036600  | -0.07254900 | 7.42708000  |
| Cl                          | -1.35741100 | -1.35050400 | -1.46908700 | C  | -1.50311400 | 0.15660000  | 8.55606900  |
| C                           | -2.60313700 | -2.73746300 | 1.16290900  | H  | -1.74211300 | 0.89693900  | 6.53401200  |
| O                           | -3.31501400 | -3.62895700 | 1.26691400  | H  | -1.24757900 | -0.78737300 | 6.62233600  |
| C                           | 0.25883500  | -3.74244700 | 1.05952200  | C  | -2.96314200 | -0.25931200 | 8.76034000  |
| H                           | -0.32449200 | -4.16682200 | 0.23427500  | H  | -0.84477600 | -0.53884200 | 9.09410400  |
| H                           | 1.24581400  | -4.21502600 | 1.05001400  | H  | -1.33612700 | 1.14410800  | 9.00731300  |
| H                           | -0.23638700 | -4.03195700 | 1.99384700  | H  | -3.22603600 | -0.28387000 | 9.82262100  |
| C                           | -4.65458700 | 1.99872500  | -0.24094500 | H  | -3.64736800 | 0.43894500  | 8.26490800  |
| C                           | -3.79989500 | 0.75437300  | -0.42833100 | H  | -3.15246700 | -1.25668800 | 8.34753900  |
| C                           | -4.42392000 | 0.04003500  | 1.74888100  | C  | 1.85749300  | -1.60971000 | 0.57138200  |
| C                           | -5.27932700 | 1.29344400  | 1.89698500  | C  | 0.77752200  | -2.15283700 | 1.18076600  |
| O                           | -3.32354200 | 0.29451800  | 0.85784300  | C  | 2.68903500  | -2.55968700 | -2.14233500 |
| O                           | -5.74800300 | 1.73804100  | 0.63409700  | O  | 2.29373200  | -1.93689800 | -3.10063800 |
| H                           | -3.99096600 | -0.25723000 | 2.70762800  | O  | 2.32531700  | -3.82390800 | -1.86083900 |
| H                           | -5.02960000 | -0.78744400 | 1.35228500  | C  | 5.03525900  | -2.72770700 | -1.29205000 |
| H                           | -6.15985400 | 1.08081400  | 2.51123600  | O  | 5.68580400  | -3.25374800 | -0.41657200 |
| H                           | -4.69054500 | 2.08467900  | 2.38950400  | O  | 5.42749400  | -2.65523500 | -2.57867700 |
| H                           | -4.38205000 | -0.04785400 | -0.89933700 | C  | 1.32566400  | -4.38428300 | -2.73764900 |
| H                           | -2.91478900 | 0.94270800  | -1.03552800 | H  | 1.66394700  | -4.34419700 | -3.77540600 |
| H                           | -4.03760800 | 2.82191200  | 0.15408900  | H  | 1.20016500  | -5.41685200 | -2.41209200 |
| H                           | -5.08119000 | 2.31168500  | -1.19842500 | H  | 0.39239500  | -3.82645700 | -2.63098100 |
| C                           | -1.16162700 | 1.56510200  | 2.95462300  | C  | 6.70200100  | -3.25398700 | -2.87471100 |
| H                           | -1.56242900 | 1.40261100  | 3.96094300  | H  | 6.85197800  | -3.10796500 | -3.94387900 |
| H                           | -0.50589100 | 2.43911000  | 2.97710400  | H  | 7.49547800  | -2.76562900 | -2.30397100 |
| H                           | -1.98572300 | 1.76397100  | 2.26906700  | H  | 6.69048700  | -4.31827200 | -2.62781300 |
| H                           | -1.07625500 | -0.58053800 | 2.64877600  | S  | 2.69178800  | 1.99228800  | -1.28206200 |
| <b>Z-TS2cc<sup>BH</sup></b> |             |             |             | O  | 1.72547000  | 2.75922000  | -0.46715200 |
| C                           | 3.68383900  | -2.02773100 | -1.08813400 | O  | 4.09884000  | 2.43351000  | -1.31652000 |
| C                           | 3.86984800  | -0.50781400 | -1.29128700 | C  | 2.09917600  | 1.95156300  | -2.98493600 |
| H                           | 4.78704300  | -0.17340400 | -0.79268200 | C  | 1.00994300  | 1.15467800  | -3.34562100 |
| H                           | 3.99690400  | -0.30678400 | -2.35807300 | C  | 2.73516600  | 2.78436000  | -3.90785300 |
| C                           | 3.18130200  | -2.30778800 | 0.34542600  | C  | 0.54741600  | 1.20759200  | -4.66073700 |
| H                           | 3.10878100  | -3.38275100 | 0.49725400  | H  | 0.54419600  | 0.47791800  | -2.63586000 |
| H                           | 3.94556300  | -1.93682800 | 1.03920600  | C  | 2.25552500  | 2.83328300  | -5.21675300 |
| C                           | 2.69167700  | 0.27673200  | -0.75728600 | H  | 3.59372000  | 3.36979700  | -3.59713400 |
| C                           | 1.74167200  | -0.23637800 | 0.06457000  | C  | 1.16297800  | 2.04778300  | -5.59136300 |
| C                           | 0.52694300  | 0.49170500  | 0.53330300  | H  | -0.28844200 | 0.58115200  | -4.95613100 |
| H                           | 0.01954500  | 1.12350300  | -0.18549300 | H  | 2.74026300  | 3.47784100  | -5.94404800 |
| C                           | 0.36015900  | 0.86232300  | 1.90285300  | H  | 0.79720600  | 2.08226000  | -6.61362400 |
| C                           | 1.51305600  | 0.68258600  | 2.90092100  | Rh | -0.89736500 | -1.02693600 | 1.14473200  |

|              |             |             |             |    |             |             |             |
|--------------|-------------|-------------|-------------|----|-------------|-------------|-------------|
| Cl           | -1.25493900 | -1.75786200 | -1.19635600 | C  | -1.29356400 | -5.28558800 | 3.21254700  |
| C            | -2.06762200 | -2.39985400 | 1.88795700  | H  | -1.02575500 | -3.14110000 | 3.11784200  |
| O            | -2.77597000 | -3.18161000 | 2.33524500  | H  | -2.70811100 | -3.64056900 | 3.27666600  |
| C            | 0.70614700  | -3.52537700 | 1.77826300  | C  | -1.10827800 | -5.40842900 | 4.72838800  |
| H            | -0.00178400 | -4.15139600 | 1.22255000  | H  | -2.02485700 | -6.02977400 | 2.87013900  |
| H            | 1.67712000  | -4.02897000 | 1.76989800  | H  | -0.34984900 | -5.52350600 | 2.70474500  |
| H            | 0.36360500  | -3.48384300 | 2.81836100  | H  | -0.77642700 | -6.41388300 | 5.00621400  |
| C            | -4.62423600 | 1.53603100  | -0.29723500 | H  | -0.35946400 | -4.69746600 | 5.09538400  |
| C            | -3.77778800 | 0.27772200  | -0.18996200 | H  | -2.04474400 | -5.20773900 | 5.26036900  |
| C            | -3.75241500 | 0.53157500  | 2.16822900  | C  | -0.96341900 | -2.10468600 | -1.60978500 |
| C            | -4.61404900 | 1.78173100  | 2.02820800  | C  | -2.26924600 | -2.44575000 | -1.33942600 |
| O            | -2.94426100 | 0.35673400  | 0.99019700  | C  | 2.24008600  | -3.51938800 | -3.29734300 |
| O            | -5.42658600 | 1.71186500  | 0.86719900  | O  | 2.66010300  | -3.20676900 | -4.38790200 |
| H            | -3.06479000 | 0.61282000  | 3.01339000  | O  | 2.38145700  | -4.74782600 | -2.75995100 |
| H            | -4.39019900 | -0.35364800 | 2.30548000  | C  | 2.02335700  | -2.74138200 | -0.94271000 |
| H            | -5.28668800 | 1.87636800  | 2.88644100  | O  | 1.45750100  | -3.23616500 | 0.00915700  |
| H            | -3.96623800 | 2.67310100  | 1.99117500  | O  | 3.27701500  | -2.25421900 | -0.89301300 |
| H            | -4.42074200 | -0.60935200 | -0.11150300 | C  | 3.08664600  | -5.70496600 | -3.57304500 |
| H            | -3.10287200 | 0.14427600  | -1.03535100 | H  | 4.10282700  | -5.35835000 | -3.77477700 |
| H            | -3.97415900 | 2.41311800  | -0.44848400 | H  | 3.10163300  | -6.62674600 | -2.99260500 |
| H            | -5.30994900 | 1.46031000  | -1.14625900 | H  | 2.56736300  | -5.85493300 | -4.52233100 |
| H            | -0.53117100 | -0.33339100 | 2.56408500  | C  | 3.94043500  | -2.36262200 | 0.37972600  |
| C            | -0.51512600 | 2.06665000  | 2.18071400  | H  | 4.93711200  | -1.95075100 | 0.22565400  |
| H            | -0.83869600 | 2.09905900  | 3.22330200  | H  | 3.40212000  | -1.79158800 | 1.13957900  |
| H            | 0.09741000  | 2.95408900  | 1.97944100  | H  | 3.99707100  | -3.40801400 | 0.69173500  |
| H            | -1.37910500 | 2.09417300  | 1.51776500  | S  | 0.93832000  | 1.46048000  | -2.49203400 |
| <b>TS2a'</b> |             |             |             | O  | 0.82377600  | 1.49903400  | -3.96395800 |
| C            | 1.43946200  | -2.60192600 | -2.35814700 | O  | 0.15891600  | 2.41242400  | -1.68054700 |
| C            | 1.50835600  | -1.16438900 | -2.87309500 | C  | 2.67804500  | 1.75013200  | -2.09747500 |
| H            | 2.53821300  | -0.80476600 | -2.81381400 | C  | 3.63363000  | 1.62660100  | -3.10850600 |
| H            | 1.24440900  | -1.15789600 | -3.93529900 | C  | 3.03204300  | 2.15712000  | -0.80869400 |
| C            | -0.02969600 | -3.04654700 | -2.36367500 | C  | 4.97197100  | 1.88990000  | -2.81249300 |
| H            | -0.34246300 | -3.14366700 | -3.41056300 | H  | 3.32094100  | 1.34859800  | -4.10913700 |
| H            | -0.08249300 | -4.03397100 | -1.91588600 | C  | 4.37292500  | 2.41561200  | -0.52432300 |
| C            | 0.59025100  | -0.26870800 | -2.06955300 | H  | 2.26829600  | 2.29331500  | -0.05150500 |
| C            | -0.50002900 | -0.71018500 | -1.36357000 | C  | 5.34097500  | 2.27762800  | -1.52269100 |
| C            | -1.40646000 | 0.18958300  | -0.54051000 | H  | 5.72289500  | 1.79918000  | -3.59139900 |
| H            | -1.51276600 | 1.13901000  | -1.05884100 | H  | 4.65939500  | 2.73789000  | 0.47227800  |
| C            | -0.96041500 | 0.53088900  | 0.96911700  | H  | 6.38303000  | 2.48511300  | -1.29746600 |
| C            | -2.01273300 | -0.07882100 | 1.97031600  | C  | -0.93996700 | 2.05492500  | 1.19099700  |
| H            | -1.54032100 | -0.40259100 | 2.90497200  | H  | -1.90219600 | 2.50602700  | 0.92764500  |
| H            | -2.78018900 | 0.65712800  | 2.22057200  | H  | -0.74982400 | 2.27640100  | 2.24840800  |
| C            | -2.58457700 | -1.21349700 | 1.21687000  | H  | -0.17576600 | 2.54122500  | 0.58448500  |
| C            | -2.34324500 | -2.41436100 | 0.89438800  | C  | 0.41744200  | -0.05760600 | 1.32314000  |
| C            | -1.93518400 | -3.78592000 | 1.25266400  | H  | 0.41623200  | -1.15077600 | 1.28020200  |
| C            | -1.75895500 | -3.88653500 | 2.78655200  | H  | 1.19424500  | 0.29534100  | 0.64031700  |
| H            | -0.99164500 | -4.02522800 | 0.74945700  | H  | 0.70202800  | 0.24676900  | 2.33718900  |
| H            | -2.68073900 | -4.51797100 | 0.93222700  | Rh | -3.31356600 | -0.67997800 | -0.60766100 |

|               |             |             |             |   |             |             |             |
|---------------|-------------|-------------|-------------|---|-------------|-------------|-------------|
| Cl            | -5.94283600 | -1.11592200 | -0.26697500 | C | 6.78427200  | -3.06835500 | -2.26911700 |
| C             | -4.19075200 | 0.97661900  | 0.00847100  | H | 6.72550800  | -2.73274500 | -3.30703300 |
| O             | -4.69175700 | 1.95157100  | 0.34276000  | H | 7.75534200  | -2.82371900 | -1.84021000 |
| C             | -5.49114200 | 0.63615100  | -4.55012800 | H | 6.60506600  | -4.14538600 | -2.23258800 |
| C             | -5.13323700 | 0.70826800  | -3.07445300 | C | -0.19088500 | -1.51914800 | -0.22622900 |
| C             | -2.83320800 | 0.66139700  | -3.66740700 | C | 0.28580200  | 0.77851600  | 0.42801900  |
| C             | -3.23323200 | 0.60782400  | -5.13667400 | H | 0.06419700  | 1.77236500  | 0.04598800  |
| O             | -3.85775600 | 0.05965200  | -2.84885300 | C | 3.75108000  | -0.22628700 | -1.28205500 |
| O             | -4.48519500 | 1.24132300  | -5.35465600 | H | 3.69490200  | -0.12003500 | -2.37274700 |
| H             | -1.91652200 | 0.09733800  | -3.49762700 | H | 4.74503600  | 0.11093900  | -0.97866900 |
| H             | -2.67991900 | 1.70199900  | -3.35118100 | S | 3.10744000  | 2.37173400  | -0.62121900 |
| H             | -2.49023400 | 1.13801000  | -5.73969300 | O | 2.11195000  | 3.12365700  | 0.15859300  |
| H             | -3.27383100 | -0.44244400 | -5.46951900 | O | 3.38671100  | 2.72469100  | -2.02612300 |
| H             | -5.05642800 | 1.75853200  | -2.75856600 | C | 4.68335500  | 2.49015500  | 0.25560300  |
| H             | -5.85411600 | 0.18482500  | -2.44395100 | C | 5.83948500  | 2.76445900  | -0.47645700 |
| H             | -5.63678500 | -0.41539500 | -4.84650300 | C | 4.71689300  | 2.36250300  | 1.64578500  |
| H             | -6.42115200 | 1.18177300  | -4.73640200 | C | 7.05292700  | 2.90651300  | 0.19929600  |
| C             | -3.03125700 | -3.65486100 | -1.96483100 | H | 5.77090900  | 2.87800600  | -1.55290000 |
| C             | -3.35726900 | -3.25269400 | -3.43006300 | C | 5.93425700  | 2.50143700  | 2.30991800  |
| C             | -2.28488500 | -5.02383800 | -2.00951100 | H | 3.80515100  | 2.16717100  | 2.19894000  |
| C             | -4.38279700 | -3.92454400 | -1.26977700 | C | 7.09999500  | 2.77230900  | 1.58799300  |
| H             | -3.96262400 | -2.34556700 | -3.45922700 | H | 7.95817500  | 3.12605800  | -0.35899400 |
| H             | -2.45164400 | -3.07793900 | -4.02053800 | H | 5.97280900  | 2.40314000  | 3.39054900  |
| H             | -3.91676600 | -4.06147600 | -3.91387000 | H | 8.04555400  | 2.88351600  | 2.11091600  |
| H             | -1.54463600 | -5.08826200 | -2.80794100 | C | 0.26540100  | 0.82281700  | 2.00226000  |
| H             | -1.79652400 | -5.27816400 | -1.06586700 | C | -1.14004900 | 0.28267900  | 2.23412200  |
| H             | -3.02504900 | -5.80508500 | -2.20956900 | C | 1.27591300  | -0.10852000 | 2.70273100  |
| H             | -4.91647500 | -4.70357200 | -1.82507000 | H | 1.17661400  | -1.14540300 | 2.37192500  |
| H             | -4.26537200 | -4.28521500 | -0.24434200 | H | 2.30416800  | 0.20705400  | 2.50688000  |
| H             | -5.01436000 | -3.03961600 | -1.22815600 | H | 1.11366700  | -0.08475500 | 3.78677700  |
| <b>TS4cc'</b> |             |             |             | C | 0.39980800  | 2.24493400  | 2.56550400  |
| C             | 1.47799800  | 0.13977800  | -0.25825000 | H | 0.23442400  | 2.23162200  | 3.65038800  |
| C             | 1.13030100  | -1.26237500 | -0.51491200 | H | 1.38992000  | 2.65567200  | 2.36559500  |
| C             | 2.14573200  | -2.17431800 | -1.15311800 | H | -0.32379800 | 2.91775200  | 2.09878800  |
| C             | 2.68769800  | 0.62987000  | -0.62701000 | C | -0.86368100 | -0.22422100 | 0.07916100  |
| H             | 2.03792800  | -3.21228900 | -0.84485200 | C | -2.12903300 | 0.18993900  | -0.36738400 |
| H             | 1.99287200  | -2.16976300 | -2.23918100 | C | -2.83828900 | -0.44997800 | -1.52647800 |
| H             | 5.35356900  | -3.34367500 | 2.36060800  | C | -2.92507600 | 0.53519600  | -2.72160600 |
| C             | 4.30068900  | -3.59545000 | 2.21425700  | H | -3.86371700 | -0.73169200 | -1.25005000 |
| O             | 3.88384100  | -3.24914000 | 0.88086600  | H | -2.31511400 | -1.34823500 | -1.87159200 |
| H             | 4.14559800  | -4.67050400 | 2.30018200  | C | -3.59012600 | -0.10077300 | -3.94846200 |
| H             | 3.70109300  | -3.05992500 | 2.95392600  | H | -3.47624500 | 1.42770700  | -2.40667800 |
| C             | 4.02387500  | -1.94604600 | 0.54852400  | H | -1.91605500 | 0.87868800  | -2.98079400 |
| C             | 3.59916800  | -1.71682300 | -0.91136500 | C | -3.67967900 | 0.86118600  | -5.13766900 |
| O             | 4.43547700  | -1.10327100 | 1.31214900  | H | -3.03031300 | -0.99853200 | -4.24541100 |
| C             | 4.53019600  | -2.54183500 | -1.81602100 | H | -4.59770600 | -0.44625000 | -3.67790200 |
| O             | 4.17114900  | -3.22473700 | -2.74848200 | H | -4.15752400 | 0.38529100  | -6.00044000 |
| O             | 5.81801700  | -2.37108000 | -1.46031500 | H | -4.26295300 | 1.75268000  | -4.88199300 |

|                |             |             |             |   |             |             |             |
|----------------|-------------|-------------|-------------|---|-------------|-------------|-------------|
| H              | -2.68487400 | 1.19777600  | -5.44966800 | O | 4.20410800  | -1.44036000 | 1.61344200  |
| H              | -1.26147000 | -0.77708100 | 2.43358100  | C | 4.88750900  | -2.66324900 | -1.55943700 |
| H              | -1.84697400 | 0.90003400  | 2.77821800  | O | 4.68793900  | -3.31266500 | -2.56056500 |
| Rh             | -3.05263700 | 1.56368900  | 0.66767300  | O | 6.10434000  | -2.48371100 | -1.00788500 |
| C              | -4.28556100 | 0.27344300  | 1.28517300  | C | 7.19766000  | -3.12232300 | -1.69326500 |
| O              | -5.12275500 | -0.40479800 | 1.70581100  | H | 7.28201900  | -2.74119300 | -2.71351300 |
| Cl             | -1.89218800 | 3.46238600  | -0.19395600 | H | 8.08841900  | -2.87603200 | -1.11635100 |
| C              | -4.37452500 | 4.99030300  | 3.54410200  | H | 7.04593800  | -4.20371700 | -1.72842200 |
| C              | -3.50313900 | 3.91125400  | 2.92055500  | C | -0.02677100 | -1.76335700 | -0.58745200 |
| C              | -5.23138100 | 3.90498600  | 1.22443000  | C | 0.30505400  | 0.52086700  | 0.19227400  |
| C              | -4.89520500 | 5.38664000  | 1.24823800  | H | 0.12704600  | 1.47139300  | -0.30783900 |
| O              | -4.26088700 | 3.12705600  | 1.97390600  | C | 4.01006600  | -0.38674200 | -1.03920800 |
| O              | -4.88131700 | 5.90716800  | 2.57769400  | H | 4.16708000  | -0.23510400 | -2.11335800 |
| H              | -6.22061300 | 3.72727700  | 1.66502500  | H | 4.92610800  | -0.05069900 | -0.54513600 |
| H              | -5.22128300 | 3.52617100  | 0.19971300  | S | 3.16839200  | 2.20193700  | -0.74944500 |
| H              | -3.92998300 | 5.54772800  | 0.75076700  | O | 1.94425300  | 2.99258800  | -0.54903100 |
| H              | -5.66132800 | 5.94336700  | 0.69864000  | O | 3.89060700  | 2.33087500  | -2.03102500 |
| H              | -2.63557200 | 4.34540200  | 2.41206800  | C | 4.35213500  | 2.67288200  | 0.53639400  |
| H              | -3.15335100 | 3.21392900  | 3.68750500  | C | 4.92656000  | 3.94159300  | 0.39982500  |
| H              | -5.20869800 | 4.51894900  | 4.08742300  | C | 4.67398100  | 1.84640800  | 1.61276800  |
| H              | -3.78308200 | 5.56039000  | 4.27080000  | C | 5.82283300  | 4.39062800  | 1.36677600  |
| C              | -0.80868000 | -2.93288000 | -0.09337900 | H | 4.67589700  | 4.56172600  | -0.45456400 |
| C              | -2.26369100 | -2.93291900 | 0.43313400  | C | 5.58167200  | 2.30691100  | 2.57201500  |
| C              | -0.78482300 | -3.71076200 | -1.43266800 | H | 4.25190700  | 0.85090800  | 1.69782800  |
| C              | 0.00631500  | -3.71972300 | 0.97368200  | C | 6.15046800  | 3.57458800  | 2.45423100  |
| H              | -2.37692800 | -2.32083500 | 1.33176400  | H | 6.26913100  | 5.37599600  | 1.26999200  |
| H              | -2.98830700 | -2.59086000 | -0.30329900 | H | 5.84254600  | 1.66556100  | 3.40873700  |
| H              | -2.53910100 | -3.95834000 | 0.70076200  | H | 6.85283300  | 3.92704500  | 3.20418700  |
| H              | 0.22711400  | -3.88137300 | -1.80456900 | C | 0.17771900  | 0.80170000  | 1.74087200  |
| H              | -1.25576100 | -4.69057800 | -1.29647000 | C | -1.31891200 | 0.89143100  | 2.12615600  |
| H              | -1.34052400 | -3.18243400 | -2.21297500 | C | 0.76376500  | -0.35913000 | 2.58014000  |
| H              | -0.36657100 | -4.74798800 | 1.03512500  | H | 0.30251400  | -1.31618700 | 2.31774000  |
| H              | 1.07510500  | -3.76463900 | 0.76248700  | H | 1.84329600  | -0.44699000 | 2.42601900  |
| H              | -0.11629700 | -3.26569600 | 1.96272500  | H | 0.59129300  | -0.18360400 | 3.64815600  |
| <b>INT-4cc</b> |             |             |             | C | 0.87699200  | 2.10992200  | 2.14547000  |
| C              | 1.59977100  | -0.08422400 | -0.33092500 | H | 0.71879600  | 2.29458400  | 3.21531300  |
| C              | 1.31943100  | -1.47855000 | -0.67926200 | H | 1.95374900  | 2.05689600  | 1.98410400  |
| C              | 2.42095300  | -2.32114200 | -1.27111700 | H | 0.50186800  | 2.95931500  | 1.57228800  |
| C              | 2.83120400  | 0.44808800  | -0.57167400 | C | -0.74496400 | -0.50501400 | -0.27413700 |
| H              | 2.28826500  | -3.38882000 | -1.11668800 | C | -2.02684500 | -0.10781900 | -0.44002000 |
| H              | 2.42479600  | -2.17855800 | -2.35910200 | C | -3.08173500 | -0.64359600 | -1.37207300 |
| H              | 5.03638500  | -3.73467100 | 2.63521700  | C | -3.70361800 | 0.43964400  | -2.28222300 |
| C              | 4.03917700  | -3.99951900 | 2.27616600  | H | -3.89687200 | -1.13989900 | -0.82490400 |
| O              | 3.86272900  | -3.55541500 | 0.91831900  | H | -2.62593100 | -1.39516800 | -2.02578700 |
| H              | 3.91448700  | -5.08147300 | 2.24847700  | C | -4.67288800 | -0.15059500 | -3.31399600 |
| H              | 3.29215900  | -3.54206400 | 2.92866200  | H | -4.23882500 | 1.18100900  | -1.67030400 |
| C              | 3.98688000  | -2.22673600 | 0.71689200  | H | -2.90390700 | 0.99403500  | -2.78562300 |
| C              | 3.81516600  | -1.89335700 | -0.77171600 | C | -5.31257500 | 0.91436500  | -4.21034200 |

|              |             |             |             |   |             |             |             |
|--------------|-------------|-------------|-------------|---|-------------|-------------|-------------|
| H            | -4.13492200 | -0.87826300 | -3.93699800 | H | 2.87081600  | -5.38003800 | 1.34021500  |
| H            | -5.45961800 | -0.71716400 | -2.79626800 | H | 2.45605900  | -3.92081400 | 2.29872600  |
| H            | -5.99067500 | 0.46499200  | -4.94319400 | C | 3.75324800  | -2.36184200 | 0.56614400  |
| H            | -5.89098500 | 1.63406500  | -3.61963200 | C | 3.87774400  | -1.68060600 | -0.80483500 |
| H            | -4.55057000 | 1.47726700  | -4.76041000 | O | 3.99775700  | -1.85932100 | 1.64240500  |
| H            | -1.68182600 | -0.08497100 | 2.44575500  | C | 4.93545400  | -2.44659000 | -1.61863400 |
| H            | -1.49872400 | 1.61633700  | 2.92573700  | O | 4.81114000  | -2.80019700 | -2.76882400 |
| Rh           | -2.63481700 | 1.53857900  | 0.60948600  | O | 6.05072100  | -2.63838400 | -0.88730400 |
| C            | -3.89280600 | 0.47245000  | 1.48985000  | C | 7.13223300  | -3.30486600 | -1.56576000 |
| O            | -4.70688000 | -0.14828500 | 2.01666600  | H | 7.44749800  | -2.72737800 | -2.43769600 |
| Cl           | -1.62364600 | 3.14210300  | -0.80481400 | H | 7.93848000  | -3.37063900 | -0.83607500 |
| C            | -3.22090200 | 5.67901700  | 2.86264900  | H | 6.82206700  | -4.30063900 | -1.89099600 |
| C            | -2.53444800 | 4.42303600  | 2.35080400  | C | 0.12678000  | -0.87215200 | -1.07563700 |
| C            | -4.64936300 | 4.09447700  | 1.22542400  | C | 0.68582100  | 0.98581900  | 0.39512500  |
| C            | -4.32781000 | 5.50425200  | 0.75602500  | H | 0.61709600  | 2.02241000  | 0.06098300  |
| O            | -3.50790000 | 3.46995000  | 1.86224200  | C | 4.34508200  | -0.21871900 | -0.65809500 |
| O            | -3.95980000 | 6.34971000  | 1.84361600  | H | 4.68335500  | 0.14908200  | -1.63391700 |
| H            | -5.47963900 | 4.11028900  | 1.94324900  | H | 5.21390800  | -0.18125900 | 0.00497800  |
| H            | -4.93275700 | 3.46666400  | 0.37496400  | S | 3.81846500  | 2.36157500  | 0.12964600  |
| H            | -3.53167200 | 5.46281700  | 0.00049300  | O | 2.68545500  | 3.25738900  | 0.41237500  |
| H            | -5.21575600 | 5.94823600  | 0.29387100  | O | 4.68630800  | 2.66294700  | -1.02575300 |
| H            | -1.82728300 | 4.65448600  | 1.54759500  | C | 4.90527300  | 2.34459600  | 1.57639400  |
| H            | -1.99559000 | 3.92605800  | 3.16173200  | C | 5.65597000  | 3.50626400  | 1.78810100  |
| H            | -3.88799700 | 5.41853100  | 3.69935500  | C | 4.99739800  | 1.25637000  | 2.44454900  |
| H            | -2.46576900 | 6.37709300  | 3.24248000  | C | 6.49700100  | 3.58049700  | 2.89596100  |
| C            | -0.59727300 | -3.20485300 | -0.62696800 | H | 5.58422200  | 4.33402100  | 1.09022300  |
| C            | -2.07386700 | -3.33251900 | -0.18082700 | C | 5.85220800  | 1.34185400  | 3.54809100  |
| C            | -0.47704700 | -3.81483700 | -2.04437400 | H | 4.43711300  | 0.34531100  | 2.26264800  |
| C            | 0.18097900  | -4.07188700 | 0.40638200  | C | 6.59524000  | 2.49941400  | 3.77736400  |
| H            | -2.28589300 | -2.72750400 | 0.70480100  | H | 7.07950300  | 4.48054800  | 3.06912300  |
| H            | -2.78003000 | -3.06266500 | -0.96239600 | H | 5.93415100  | 0.49601800  | 4.22419900  |
| H            | -2.27195100 | -4.37853700 | 0.07433900  | H | 7.25519000  | 2.56009500  | 4.63793300  |
| H            | 0.55731800  | -3.89332100 | -2.38580800 | C | 0.46540300  | 0.92452100  | 1.94265800  |
| H            | -0.90824700 | -4.82232300 | -2.05434900 | C | -1.02819400 | 1.25754800  | 2.13961700  |
| H            | -1.02331000 | -3.21045000 | -2.77627100 | C | 0.74167000  | -0.48809500 | 2.50004700  |
| H            | -0.14945500 | -5.11360300 | 0.32876200  | H | 0.14010800  | -1.24960100 | 1.99440300  |
| H            | 1.26247600  | -4.05816700 | 0.28707800  | H | 1.79489700  | -0.75906600 | 2.39100400  |
| H            | -0.04108600 | -3.72985900 | 1.42303500  | H | 0.49981900  | -0.52131000 | 3.56827200  |
| <b>TS5cc</b> |             |             |             | C | 1.28553300  | 1.94382700  | 2.75265000  |
| C            | 1.93049400  | 0.32463500  | -0.15522600 | H | 0.96336800  | 1.92281100  | 3.80084300  |
| C            | 1.50119200  | -0.83774400 | -0.92932200 | H | 2.35049800  | 1.70719800  | 2.73965600  |
| C            | 2.54194500  | -1.71452500 | -1.57548800 | H | 1.16782800  | 2.95663600  | 2.36341900  |
| C            | 3.24355600  | 0.68118900  | -0.13163400 | C | -0.46091000 | 0.13593000  | -0.17165500 |
| H            | 2.20427400  | -2.74697600 | -1.66441400 | C | -1.69634700 | 0.29219200  | 0.40367200  |
| H            | 2.76674400  | -1.37078400 | -2.58986600 | C | -2.69589100 | -0.82820000 | 0.64069200  |
| H            | 4.15388100  | -4.43651200 | 2.16845400  | C | -4.16138300 | -0.71292600 | 0.16184300  |
| C            | 3.19683700  | -4.38587600 | 1.64416000  | H | -2.72031300 | -1.00619500 | 1.72689900  |
| O            | 3.33161500  | -3.63358100 | 0.42445700  | H | -2.26380200 | -1.74415600 | 0.22571400  |



|                |             |             |             |   |             |             |             |
|----------------|-------------|-------------|-------------|---|-------------|-------------|-------------|
| C              | -4.87474700 | -2.07285500 | 0.16773000  | H | 2.41790100  | -0.50840300 | -2.67970700 |
| H              | -4.71674300 | -0.02799800 | 0.80821300  | H | 4.44899400  | -4.41184600 | 1.11336300  |
| H              | -4.20721900 | -0.27506900 | -0.84122700 | C | 3.44867600  | -4.33588000 | 0.68076600  |
| C              | -6.35433800 | -1.97493500 | -0.21664800 | O | 3.41212300  | -3.30430100 | -0.32129300 |
| H              | -4.36193500 | -2.75748000 | -0.52165400 | H | 3.18189500  | -5.25676500 | 0.16307200  |
| H              | -4.78495900 | -2.52443300 | 1.16564200  | H | 2.73226800  | -4.12093100 | 1.47720500  |
| H              | -6.83615500 | -2.95804900 | -0.20586800 | C | 3.73951000  | -2.06603500 | 0.10322500  |
| H              | -6.90205200 | -1.32853900 | 0.47849900  | C | 3.69724700  | -1.07005100 | -1.06703800 |
| H              | -6.47573700 | -1.55648700 | -1.22228000 | O | 4.02848000  | -1.81344200 | 1.25248900  |
| H              | -1.54043200 | 0.56872300  | 2.81118200  | C | 4.74062800  | -1.52347400 | -2.10413300 |
| H              | -1.12713100 | 2.27027600  | 2.54631300  | O | 4.54787600  | -1.62673400 | -3.29373300 |
| Rh             | -2.49601400 | 2.22402700  | 0.65708400  | O | 5.92857100  | -1.75705100 | -1.51115400 |
| C              | -3.72401200 | 1.82445200  | 1.99280700  | C | 6.99672500  | -2.14764200 | -2.39409100 |
| O              | -4.51439000 | 1.69928700  | 2.82714000  | H | 7.18400300  | -1.36649200 | -3.13436500 |
| Cl             | -1.27303000 | 3.13304600  | -1.21920500 | H | 7.86764800  | -2.28850600 | -1.75490300 |
| C              | -4.30333500 | 6.38338800  | 0.66356900  | H | 6.74292500  | -3.07532200 | -2.91244100 |
| C              | -3.21492600 | 5.30934600  | 0.55017100  | C | -0.11377200 | -0.47408300 | -1.00960700 |
| C              | -4.56224200 | 4.01825500  | -0.98574700 | C | 0.43806500  | 0.95092100  | 0.92791000  |
| C              | -4.93671100 | 5.44111100  | -1.40546600 | H | 0.33427300  | 2.03749500  | 0.93133700  |
| O              | -3.83903500 | 4.03575100  | 0.27989300  | C | 4.06668700  | 0.35056700  | -0.59364000 |
| O              | -5.35727800 | 6.19088900  | -0.27949800 | H | 4.28095300  | 0.97712000  | -1.46786700 |
| H              | -5.45557300 | 3.41850800  | -0.79191500 | H | 4.98552300  | 0.30539400  | -0.00238200 |
| H              | -3.93942400 | 3.53661900  | -1.74579400 | S | 3.44481000  | 2.52287800  | 0.98054700  |
| H              | -4.09841000 | 5.93087300  | -1.92281600 | O | 2.30235200  | 3.12895900  | 1.68687100  |
| H              | -5.77857600 | 5.40578000  | -2.10278100 | O | 4.12158400  | 3.29667400  | -0.07768600 |
| H              | -2.47555000 | 5.51926700  | -0.22772100 | C | 4.72210200  | 2.12209500  | 2.19674800  |
| H              | -2.68363900 | 5.19695800  | 1.49720000  | C | 5.71239900  | 3.08582400  | 2.40641200  |
| H              | -4.77003100 | 6.35499300  | 1.65343500  | C | 4.69475700  | 0.93850400  | 2.93520800  |
| H              | -3.83889700 | 7.37401500  | 0.53066800  | C | 6.67582600  | 2.86656400  | 3.39002800  |
| C              | -0.60127500 | -1.69963000 | -2.16577500 | H | 5.72564600  | 3.98221100  | 1.79581000  |
| C              | -1.94628500 | -1.05134400 | -2.55878900 | C | 5.67279300  | 0.72537800  | 3.90922200  |
| C              | 0.21526700  | -1.73024600 | -3.48862900 | H | 3.95574300  | 0.17387500  | 2.72723300  |
| C              | -0.82506000 | -3.16050800 | -1.70448700 | C | 6.65519200  | 1.68912300  | 4.14240300  |
| H              | -2.68289900 | -1.08784900 | -1.76535000 | H | 7.44710100  | 3.61127600  | 3.56304900  |
| H              | -1.80930600 | -0.00362400 | -2.84186100 | H | 5.66735800  | -0.19908900 | 4.47873800  |
| H              | -2.36579400 | -1.58704700 | -3.41666700 | H | 7.41149200  | 1.51901500  | 4.90330700  |
| H              | 1.08905500  | -2.37880400 | -3.45133000 | C | 0.21646600  | 0.41962800  | 2.39513000  |
| H              | -0.42602700 | -2.11598700 | -4.28721500 | C | -1.33627200 | 0.41181300  | 2.44236500  |
| H              | 0.53700200  | -0.72530600 | -3.77873700 | C | 0.73540900  | -1.02266000 | 2.55808200  |
| H              | -1.30243500 | -3.73534000 | -2.50619800 | H | 0.31297400  | -1.69971400 | 1.80776900  |
| H              | 0.12109900  | -3.65344900 | -1.45922200 | H | 1.82348300  | -1.07394200 | 2.46792700  |
| H              | -1.46829200 | -3.22575000 | -0.82249100 | H | 0.46157900  | -1.40747600 | 3.54694600  |
| <b>INT-5cc</b> |             |             |             | C | 0.77827700  | 1.29984000  | 3.51629400  |
| C              | 1.66924500  | 0.54306700  | 0.15794400  | H | 0.41040700  | 0.93495900  | 4.48351700  |
| C              | 1.25290200  | -0.40967000 | -0.87811600 | H | 1.86879000  | 1.28509300  | 3.54832800  |
| C              | 2.30850300  | -1.05767700 | -1.73972600 | H | 0.47343200  | 2.34246800  | 3.39942900  |
| C              | 2.95408000  | 0.97367000  | 0.22090300  | C | -0.70449700 | 0.26499900  | 0.14881000  |
| H              | 2.04295400  | -2.07960300 | -2.00793100 | C | -1.77218300 | -0.00727600 | 1.02652300  |

|              |             |             |             |    |             |             |             |
|--------------|-------------|-------------|-------------|----|-------------|-------------|-------------|
| C            | -2.76876700 | -1.14847300 | 0.95661700  | C  | 0.23096000  | -0.89988100 | -0.46701200 |
| C            | -4.13240400 | -0.95759600 | 1.63945500  | Rh | -2.15574700 | -0.39654200 | -0.74073000 |
| H            | -2.25499700 | -1.98357200 | 1.46292200  | Cl | -3.01797700 | -2.26251900 | -2.13800600 |
| H            | -2.93655800 | -1.47873600 | -0.06533600 | C  | 1.18453100  | -1.35166600 | -1.54851900 |
| C            | -4.91235300 | -2.27470300 | 1.75226200  | C  | 1.24126100  | 1.33219500  | -0.66233700 |
| H            | -4.00653500 | -0.52480400 | 2.63966600  | H  | 1.26021000  | -2.43351900 | -1.61392700 |
| H            | -4.72687600 | -0.23719300 | 1.06628100  | H  | 0.79454900  | -1.00675100 | -2.51233900 |
| C            | -6.29539600 | -2.09822700 | 2.38651000  | H  | 4.93923000  | -2.63960000 | 1.33522100  |
| H            | -5.02123100 | -2.71885600 | 0.75331400  | C  | 3.94322200  | -3.06128800 | 1.18314000  |
| H            | -4.32760300 | -2.99419500 | 2.34184600  | O  | 3.34707200  | -2.51666400 | -0.01025000 |
| H            | -6.82634300 | -3.05295500 | 2.45816500  | H  | 4.00047200  | -4.13614600 | 1.01635800  |
| H            | -6.21735600 | -1.68357200 | 3.39792400  | H  | 3.32360800  | -2.83868600 | 2.05472900  |
| H            | -6.91711600 | -1.41461800 | 1.79767100  | C  | 3.19498400  | -1.17905500 | -0.03122000 |
| H            | -1.71110300 | -0.30210300 | 3.18562900  | C  | 2.57762300  | -0.72692600 | -1.36183600 |
| H            | -1.70880400 | 1.39418200  | 2.74111200  | O  | 3.49983000  | -0.45849800 | 0.89538700  |
| Rh           | -2.20081500 | 1.95085800  | -0.31509500 | C  | 3.49419500  | -1.17671700 | -2.51062300 |
| C            | -3.45425600 | 2.08145400  | 1.03216800  | O  | 3.12055800  | -1.71907100 | -3.52461600 |
| O            | -4.22833300 | 2.33311600  | 1.85606500  | O  | 4.77267100  | -0.83875300 | -2.25644400 |
| Cl           | -0.62948500 | 2.42602200  | -2.12498000 | C  | 5.72000300  | -1.16385100 | -3.29309800 |
| C            | -3.49969400 | 6.15151600  | -0.96853900 | H  | 5.45772800  | -0.65154400 | -4.22136400 |
| C            | -2.48535500 | 5.00584300  | -0.88447100 | H  | 6.68575700  | -0.82106700 | -2.92383400 |
| C            | -3.78446400 | 3.65155500  | -2.41045500 | H  | 5.73319100  | -2.24149300 | -3.47123800 |
| C            | -4.03205300 | 5.04873300  | -2.98744500 | C  | -0.55301600 | -1.83082600 | 0.20482900  |
| O            | -3.18679100 | 3.75804000  | -1.08703000 | C  | -1.08811000 | 1.04673100  | 0.39437500  |
| O            | -4.48866400 | 5.92664000  | -1.97423600 | H  | -1.31856500 | 2.05345200  | 0.06170500  |
| H            | -4.72372100 | 3.11569100  | -2.25270700 | C  | 2.44514900  | 0.80535200  | -1.42195300 |
| H            | -3.11725000 | 3.06928200  | -3.05255200 | H  | 2.35342500  | 1.11167900  | -2.47010700 |
| H            | -3.12631900 | 5.43797300  | -3.47589000 | H  | 3.36708700  | 1.26462700  | -1.05833500 |
| H            | -4.81787800 | 4.99464300  | -3.74624500 | S  | 1.26074300  | 3.14616600  | -0.65734400 |
| H            | -1.67623700 | 5.08532400  | -1.61553800 | O  | -0.08374400 | 3.71458900  | -0.42324300 |
| H            | -2.03663200 | 4.95049300  | 0.10813700  | O  | 1.95965800  | 3.52460400  | -1.90212900 |
| H            | -4.04321200 | 6.25442100  | -0.02420500 | C  | 2.28038000  | 3.67818300  | 0.73797600  |
| H            | -2.95788900 | 7.09199400  | -1.15922800 | C  | 2.15761300  | 5.02533900  | 1.09484300  |
| C            | -0.86247600 | -1.24028700 | -2.12657700 | C  | 3.17493400  | 2.83128500  | 1.39402300  |
| C            | -2.26866900 | -0.66615300 | -2.43736000 | C  | 2.95330500  | 5.53112100  | 2.12095300  |
| C            | -0.12838100 | -1.16139300 | -3.49374000 | H  | 1.44097000  | 5.65911500  | 0.58357200  |
| C            | -0.96690400 | -2.73479200 | -1.72064500 | C  | 3.96128200  | 3.35309900  | 2.42504100  |
| H            | -2.87504200 | -0.43800100 | -1.56266800 | H  | 3.25465100  | 1.78060800  | 1.13737800  |
| H            | -2.17146300 | 0.26236300  | -3.00224500 | C  | 3.85633900  | 4.69673200  | 2.78536500  |
| H            | -2.81758000 | -1.38875300 | -3.05206200 | H  | 2.86370500  | 6.57544600  | 2.40459400  |
| H            | 0.75408500  | -1.79659000 | -3.55951300 | H  | 4.65494300  | 2.69978400  | 2.94568900  |
| H            | -0.81657100 | -1.50040800 | -4.27511700 | H  | 4.47259500  | 5.09402300  | 3.58657400  |
| H            | 0.15301200  | -0.12993400 | -3.72093700 | C  | -1.27743100 | 0.98904300  | 1.93294700  |
| H            | -1.43375900 | -3.30756200 | -2.52987800 | C  | -1.21084000 | -0.45492500 | 2.49207300  |
| H            | 0.02320800  | -3.16371300 | -1.53583600 | C  | -0.15840400 | 1.78037600  | 2.65077400  |
| H            | -1.56476900 | -2.88375400 | -0.81862200 | H  | 0.83144500  | 1.36812400  | 2.43690900  |
| <b>TS2b'</b> |             |             |             | H  | -0.16736600 | 2.82616300  | 2.33234000  |
| C            | 0.21246000  | 0.57529200  | -0.18252000 | H  | -0.30565000 | 1.75788700  | 3.73700700  |

|                |             |             |             |   |             |             |             |
|----------------|-------------|-------------|-------------|---|-------------|-------------|-------------|
| C              | -2.62067200 | 1.64874900  | 2.30006100  | H | 1.34498500  | -2.51630100 | -1.21786000 |
| H              | -2.75045000 | 1.68087700  | 3.38765700  | H | 0.86127300  | -1.22382400 | -2.28330100 |
| H              | -2.64668700 | 2.67919400  | 1.93174500  | H | 4.96797300  | -2.24087300 | 1.81479000  |
| H              | -3.47474100 | 1.12182300  | 1.87456200  | C | 4.01064000  | -2.74643500 | 1.66885900  |
| C              | -0.44074800 | -3.32512700 | 0.00474000  | O | 3.41875200  | -2.34508300 | 0.41889400  |
| H              | 0.58998800  | -3.63464300 | -0.17736400 | H | 4.15174200  | -3.82400800 | 1.59327400  |
| H              | -0.80873200 | -3.82025800 | 0.90685300  | H | 3.34808700  | -2.50144800 | 2.50217600  |
| H              | -1.06716300 | -3.64315100 | -0.83680900 | C | 3.16442600  | -1.02554600 | 0.29155000  |
| C              | -1.71954300 | -1.41690300 | 1.00410300  | C | 2.57052500  | -0.72496300 | -1.09304200 |
| C              | -2.32152100 | -1.88040700 | 2.09471500  | O | 3.37353800  | -0.21832200 | 1.16991400  |
| C              | -3.75894900 | -1.81063100 | 2.49489600  | C | 3.55233700  | -1.21280200 | -2.16878900 |
| C              | -4.02992700 | -1.98799500 | 3.99565900  | O | 3.25360800  | -1.86921200 | -3.13923500 |
| H              | -4.21125600 | -2.65210400 | 1.94850200  | O | 4.79826300  | -0.76706500 | -1.91084000 |
| H              | -4.27352600 | -0.91293400 | 2.11830900  | C | 5.80036500  | -1.13086900 | -2.87946700 |
| C              | -5.52530700 | -2.06192500 | 4.32730300  | H | 5.54166200  | -0.73253700 | -3.86315800 |
| H              | -3.52239800 | -2.89578500 | 4.34490200  | H | 6.72942400  | -0.69117700 | -2.51839500 |
| H              | -3.58299500 | -1.15228400 | 4.55428900  | H | 5.88721700  | -2.21775000 | -2.94720200 |
| C              | -5.80205500 | -2.22144900 | 5.82541000  | C | -0.54827600 | -1.85565400 | 0.50592900  |
| H              | -6.02490300 | -1.15686700 | 3.95619500  | C | -1.11678600 | 0.97192400  | 0.65241800  |
| H              | -5.97412500 | -2.90129200 | 3.77926200  | H | -1.36176000 | 1.97648500  | 0.32878100  |
| H              | -6.87632800 | -2.27291700 | 6.02924200  | C | 2.35300000  | 0.78700300  | -1.27989700 |
| H              | -5.34469800 | -3.13662700 | 6.21829600  | H | 2.21481000  | 0.99474000  | -2.34822500 |
| H              | -5.39573600 | -1.37832000 | 6.39602200  | H | 3.25603200  | 1.31936100  | -0.96945000 |
| C              | -3.88966900 | 0.27042900  | -0.51606300 | S | 1.12156000  | 3.10420700  | -0.56861800 |
| O              | -4.97919700 | 0.62470500  | -0.40900700 | O | -0.00366300 | 3.66218900  | 0.20949500  |
| C              | -1.77611800 | 2.24782000  | -3.16935000 | O | 1.22619600  | 3.47039000  | -1.99866700 |
| C              | -0.88571700 | 2.80528500  | -4.27415200 | C | 2.66141300  | 3.65663700  | 0.19991400  |
| C              | -0.89321300 | 0.72019800  | -5.34222300 | C | 3.31890000  | 4.73009300  | -0.40571900 |
| C              | -1.79660000 | 0.15292600  | -4.25637200 | C | 3.13063200  | 3.08914600  | 1.38571600  |
| O              | -1.10361500 | 2.11801800  | -5.50213000 | C | 4.45966300  | 5.25464400  | 0.20176500  |
| O              | -1.54596800 | 0.83675300  | -3.01475700 | H | 2.94022800  | 5.13246600  | -1.33878700 |
| H              | 0.16187500  | 0.51849100  | -5.08998100 | C | 4.28035500  | 3.61573500  | 1.97564400  |
| H              | -1.11408200 | 0.25259600  | -6.30697900 | H | 2.63370100  | 2.23148500  | 1.82157100  |
| H              | -2.85177100 | 0.28251800  | -4.53468000 | C | 4.93857500  | 4.69976000  | 1.39073800  |
| H              | -1.62001800 | -0.90733900 | -4.07053800 | H | 4.97700900  | 6.09141900  | -0.25786200 |
| H              | -1.11782400 | 3.85951600  | -4.45365900 | H | 4.66202000  | 3.17365200  | 2.89084100  |
| H              | 0.17005900  | 2.73255200  | -3.96976100 | H | 5.83056400  | 5.10716900  | 1.85774200  |
| H              | -1.54706700 | 2.72084900  | -2.21264200 | C | -1.28253600 | 0.99741800  | 2.23615700  |
| H              | -2.83518900 | 2.41452800  | -3.41812800 | C | -1.46301000 | -0.39570600 | 2.97908900  |
| H              | -0.19559200 | -0.82714900 | 2.61912300  | C | -0.04585600 | 1.66875700  | 2.87148800  |
| H              | -1.69318400 | -0.47695000 | 3.47274200  | H | 0.85730100  | 1.07412100  | 2.69903700  |
| <b>INT-3b'</b> |             |             |             | H | 0.11112400  | 2.67408500  | 2.47540400  |
| C              | 0.15661300  | 0.52473100  | 0.00804600  | H | -0.18845100 | 1.74844800  | 3.95612100  |
| C              | 0.19389400  | -0.94080600 | -0.27303600 | C | -2.50547400 | 1.89964800  | 2.51376800  |
| Rh             | -2.08826200 | -0.44175300 | -0.73669500 | H | -2.72403200 | 1.94593600  | 3.58639800  |
| Cl             | -2.57882100 | -2.38485600 | -2.23151100 | H | -2.30386300 | 2.91889900  | 2.16938200  |
| C              | 1.21664600  | -1.43747500 | -1.26940600 | H | -3.40365800 | 1.54945200  | 1.99821500  |
| C              | 1.15246000  | 1.30490200  | -0.51359600 | C | -0.21333400 | -3.32945700 | 0.55592500  |

|              |             |             |             |   |             |             |            |
|--------------|-------------|-------------|-------------|---|-------------|-------------|------------|
| H            | 0.86494900  | -3.50220600 | 0.60597100  | H | -0.08534700 | -6.67815900 | 5.18501500 |
| H            | -0.69830000 | -3.77456500 | 1.42883500  | C | 2.10861200  | -5.68759300 | 4.05119400 |
| H            | -0.61134200 | -3.83233500 | -0.33332800 | C | 2.86001900  | -4.61843100 | 3.23881500 |
| C            | -1.84323200 | -1.49876800 | 0.97336800  | O | 2.52640300  | -6.24450700 | 5.04178500 |
| C            | -2.42504900 | -1.19972800 | 2.14314100  | C | 3.22845500  | -5.22435600 | 1.87111200 |
| C            | -3.90221300 | -1.21258400 | 2.41817900  | O | 3.19920200  | -4.63276000 | 0.81555000 |
| C            | -4.27585000 | -2.37479900 | 3.36866400  | O | 3.64557900  | -6.49769800 | 2.00557700 |
| H            | -4.45931300 | -1.33984400 | 1.48445200  | C | 4.05939900  | -7.14932400 | 0.78955700 |
| H            | -4.22820300 | -0.27258500 | 2.87856200  | H | 4.89832100  | -6.61530500 | 0.33753500 |
| C            | -5.77399300 | -2.41250300 | 3.69667700  | H | 4.35675800  | -8.15512300 | 1.08388200 |
| H            | -3.97413400 | -3.32185600 | 2.90374100  | H | 3.23301500  | -7.18317000 | 0.07597300 |
| H            | -3.69885900 | -2.28894300 | 4.29970700  | C | 1.05015900  | -1.38440200 | 4.11838900 |
| C            | -6.15393900 | -3.57318900 | 4.62149700  | C | 2.56448500  | -1.92456800 | 6.71970500 |
| H            | -6.06810900 | -1.46105700 | 4.16033800  | H | 3.44762000  | -2.03633600 | 7.33814600 |
| H            | -6.34532800 | -2.48535400 | 2.76176500  | C | 4.15920100  | -4.23653200 | 3.97296100 |
| H            | -7.22697900 | -3.57468700 | 4.83876700  | H | 4.75321900  | -3.59134500 | 3.31047000 |
| H            | -5.90533000 | -4.53885900 | 4.16716600  | H | 4.74294200  | -5.13670400 | 4.15243800 |
| H            | -5.62102000 | -3.51053800 | 5.57728700  | S | 4.95152400  | -3.85853900 | 6.66773200 |
| C            | -3.88510100 | 0.12535400  | -0.61483700 | O | 4.18312800  | -4.44859600 | 7.77862500 |
| O            | -4.98152600 | 0.46761300  | -0.57558200 | O | 5.76423000  | -2.64272300 | 6.90799200 |
| C            | -2.21141600 | 2.32485100  | -2.58653000 | C | 6.10505200  | -5.13376500 | 6.11924500 |
| C            | -1.63181100 | 3.15496200  | -3.72585500 | C | 5.73866300  | -6.47734400 | 6.23804200 |
| C            | -1.38446400 | 1.24819100  | -5.03320600 | C | 7.37234700  | -4.75412100 | 5.67468200 |
| C            | -1.97667400 | 0.38054200  | -3.93441000 | C | 6.66456200  | -7.45776900 | 5.88203800 |
| O            | -1.91888800 | 2.56357600  | -4.98811800 | H | 4.74827200  | -6.73747600 | 6.59360000 |
| O            | -1.70238700 | 0.97051300  | -2.63730400 | C | 8.28965200  | -5.74639700 | 5.32519300 |
| H            | -0.28663500 | 1.27648700  | -4.93710000 | H | 7.63288900  | -3.70247400 | 5.63042400 |
| H            | -1.63881400 | 0.82826800  | -6.01147000 | C | 7.93479000  | -7.09342100 | 5.42617200 |
| H            | -3.06323700 | 0.29154800  | -4.05886800 | H | 6.39625500  | -8.50643200 | 5.96724500 |
| H            | -1.55182000 | -0.62242300 | -3.91806200 | H | 9.28208100  | -5.46734800 | 4.98421500 |
| H            | -2.09010700 | 4.14890000  | -3.72366800 | H | 8.65288900  | -7.86248200 | 5.15644900 |
| H            | -0.54890800 | 3.26485700  | -3.58166500 | C | 1.30487500  | -2.18792000 | 7.61413900 |
| H            | -1.91396700 | 2.74337700  | -1.62415100 | C | 0.66022200  | -0.79025900 | 7.80601400 |
| H            | -3.30820500 | 2.29227700  | -2.65479000 | H | 1.08100800  | -0.23231000 | 8.64577200 |
| H            | -0.48834400 | -0.89395800 | 3.03838500  | C | 1.74993300  | -2.68187100 | 9.00690400 |
| H            | -1.80715900 | -0.20841700 | 4.00362900  | H | 0.88827700  | -2.76297500 | 9.68059000 |
| <b>TS3b'</b> |             |             |             | H | 2.23532600  | -3.65696300 | 8.93022300 |
| C            | 2.79448000  | -2.64879000 | 5.41251800  | H | 2.46893300  | -1.99047600 | 9.46044300 |
| C            | 1.93906400  | -2.41989400 | 4.21674100  | C | 0.30521400  | -3.20806300 | 7.04183600 |
| Rh           | 2.33913600  | 0.14976700  | 6.50232300  | H | -0.12129500 | -2.89269900 | 6.08763300 |
| C            | 2.03130500  | -3.34786400 | 3.01648000  | H | 0.79984200  | -4.17378200 | 6.89467300 |
| C            | 3.83985200  | -3.51785500 | 5.26313300  | H | -0.51964300 | -3.36021200 | 7.74807700 |
| H            | 1.03114200  | -3.63082700 | 2.67791800  | C | 0.15684400  | -1.19088600 | 2.90545700 |
| H            | 2.48988200  | -2.81872300 | 2.17210400  | H | 0.73249400  | -1.21797700 | 1.97421300 |
| H            | 0.67562600  | -7.91616200 | 4.15913000  | H | -0.60378000 | -1.97947500 | 2.83692000 |
| C            | 0.13203500  | -6.96853900 | 4.15461400  | H | -0.35821900 | -0.23069700 | 2.95377000 |
| O            | 0.90776100  | -5.94899700 | 3.49793400  | C | 0.87312500  | -0.48624000 | 5.21585200 |
| H            | -0.78775900 | -7.05450600 | 3.57693800  | C | 0.13690100  | 0.00386200  | 6.16794500 |

|               |             |             |             |   |             |             |             |
|---------------|-------------|-------------|-------------|---|-------------|-------------|-------------|
| C             | -1.05147700 | 0.87762000  | 6.40719300  | O | 6.49509100  | -0.35250400 | -2.10378000 |
| C             | -1.55648400 | 1.60136800  | 5.15249000  | C | 7.53133900  | -0.15313700 | -3.08201700 |
| H             | -0.76804800 | 1.61870600  | 7.16340500  | H | 7.52423100  | 0.88482800  | -3.43660400 |
| H             | -1.85547200 | 0.26567800  | 6.84714200  | H | 8.46985900  | -0.37780900 | -2.56683300 |
| C             | -2.74847900 | 2.51998800  | 5.45102000  | H | 7.38233500  | -0.82321200 | -3.93642700 |
| H             | -0.72849700 | 2.18915600  | 4.74143600  | C | 0.44621000  | -1.13006600 | -1.21409200 |
| H             | -1.84649400 | 0.86397600  | 4.39174900  | C | 0.62413400  | -0.21080700 | 1.01675900  |
| C             | -3.26059100 | 3.25269800  | 4.20700800  | H | 0.23956000  | 0.66759400  | 1.52972600  |
| H             | -3.56525300 | 1.93201700  | 5.89285600  | C | 4.10100900  | 0.87492800  | -0.62045100 |
| H             | -2.45107100 | 3.25340100  | 6.21157500  | H | 3.93153400  | 1.70345900  | -1.31995900 |
| H             | -4.10872000 | 3.90191000  | 4.44744500  | H | 5.05518700  | 1.05958200  | -0.12075000 |
| H             | -2.47592000 | 3.87848000  | 3.76784700  | S | 3.11671100  | 2.01911200  | 1.71754800  |
| H             | -3.59091100 | 2.54566600  | 3.43702100  | O | 2.08835200  | 1.74532000  | 2.73503600  |
| H             | -0.41278600 | -0.84680400 | 8.00776500  | O | 3.19835600  | 3.33473400  | 1.05710900  |
| C             | 3.66629800  | 0.74647800  | 7.92205900  | C | 4.72279000  | 1.73807500  | 2.49094200  |
| O             | 4.35798500  | 1.09223200  | 8.76478500  | C | 5.79921600  | 2.55341900  | 2.13092300  |
| Cl            | 1.91654300  | 2.68486200  | 6.35777400  | C | 4.85203400  | 0.75605900  | 3.47284200  |
| C             | 5.37923500  | 0.27623900  | 5.22193800  | C | 7.03249700  | 2.36237600  | 2.75573300  |
| C             | 6.26641700  | 0.06215400  | 4.00332100  | H | 5.65412600  | 3.33322000  | 1.39133000  |
| C             | 4.68216200  | 1.09361800  | 2.63092000  | C | 6.08805200  | 0.57498900  | 4.09145900  |
| C             | 3.77239600  | 1.33410000  | 3.82742200  | H | 3.99315800  | 0.15798400  | 3.76041600  |
| O             | 6.04952200  | 1.06513400  | 3.02110300  | C | 7.17666300  | 1.37341600  | 3.73073100  |
| O             | 3.99523000  | 0.29988300  | 4.81150900  | H | 7.87609500  | 2.99132400  | 2.48716500  |
| H             | 4.40809100  | 0.14492000  | 2.13906600  | H | 6.20001300  | -0.18380800 | 4.85997900  |
| H             | 4.57456700  | 1.90622400  | 1.90577000  | H | 8.13692400  | 1.22973700  | 4.21765500  |
| H             | 3.95697000  | 2.31099700  | 4.28643800  | C | 0.72681400  | -1.41577600 | 2.03321200  |
| H             | 2.71806400  | 1.27710600  | 3.55162300  | C | -0.42873500 | -2.26922900 | 1.53285600  |
| H             | 7.32093900  | 0.11674900  | 4.29079900  | C | 2.01702100  | -2.26008400 | 1.95145100  |
| H             | 6.06982200  | -0.93702300 | 3.57885800  | H | 2.20460100  | -2.62969800 | 0.94044500  |
| H             | 5.48582700  | -0.54729200 | 5.93029700  | H | 2.88927100  | -1.68330400 | 2.26760400  |
| H             | 5.62523200  | 1.23078100  | 5.70702800  | H | 1.92777900  | -3.12772900 | 2.61383600  |
| <b>TS4dd'</b> |             |             |             | C | 0.51153200  | -0.96552900 | 3.48578800  |
| C             | 1.87067800  | 0.06551100  | 0.19338300  | H | 0.51458500  | -1.83686100 | 4.15483300  |
| C             | 1.72478800  | -0.67637300 | -1.05583400 | H | 1.30646300  | -0.28250800 | 3.79163200  |
| C             | 2.84475300  | -0.79744300 | -2.04643300 | H | -0.43409800 | -0.42826300 | 3.59620100  |
| C             | 2.97854700  | 0.81770900  | 0.39955800  | C | -0.38305200 | -0.73306000 | -0.06121600 |
| H             | 2.87954500  | -1.80005100 | -2.48812600 | C | -1.77314400 | -0.52688900 | -0.08627200 |
| H             | 2.68899500  | -0.10250300 | -2.88456800 | C | -2.50358500 | -0.28048500 | -1.38122000 |
| H             | 6.26147500  | -3.68554300 | -0.10025800 | C | -2.95847400 | 1.20556800  | -1.42083300 |
| C             | 5.21388200  | -3.86314100 | -0.35733400 | H | -3.39487300 | -0.91677000 | -1.46879200 |
| O             | 4.69135800  | -2.76054300 | -1.11791600 | H | -1.87363600 | -0.45848100 | -2.25745500 |
| H             | 5.11875200  | -4.73580500 | -1.00012600 | C | -3.60722700 | 1.59480100  | -2.75426600 |
| H             | 4.64271300  | -3.99741800 | 0.56198400  | H | -3.64909400 | 1.38585500  | -0.59016800 |
| C             | 4.73509500  | -1.56186500 | -0.49738600 | H | -2.08866500 | 1.84796800  | -1.23378900 |
| C             | 4.21232900  | -0.44643100 | -1.42173200 | C | -4.01229800 | 3.07168000  | -2.79480600 |
| O             | 5.14961300  | -1.40942800 | 0.62806100  | H | -2.91004200 | 1.38509800  | -3.57728900 |
| C             | 5.23291000  | -0.24086500 | -2.55811900 | H | -4.48912900 | 0.96394100  | -2.93173300 |
| O             | 4.94766000  | 0.02225900  | -3.70464900 | H | -4.47008900 | 3.33720700  | -3.75266600 |

|                |             |             |             |    |             |             |             |
|----------------|-------------|-------------|-------------|----|-------------|-------------|-------------|
| H              | -4.73277900 | 3.30440200  | -2.00327800 | C  | 0.72415300  | -0.66999700 | -1.73184800 |
| H              | -3.14210900 | 3.72113400  | -2.64881800 | C  | 0.82115300  | -0.05329900 | 0.61060000  |
| H              | -0.22914400 | -3.00593500 | 0.76050700  | H  | 0.50450900  | 0.90606400  | 1.02089400  |
| H              | -1.19017100 | -2.58145200 | 2.23942500  | C  | 4.54851500  | 0.74229400  | -0.64732000 |
| Rh             | -2.81659100 | -0.74260600 | 1.54705500  | H  | 4.58524000  | 1.68784700  | -1.20063700 |
| C              | -3.67707700 | -2.22988300 | 0.79874100  | H  | 5.46857200  | 0.70339100  | -0.06056000 |
| O              | -4.33261300 | -3.13804500 | 0.44914700  | S  | 3.47870700  | 1.95094200  | 1.58471200  |
| Cl             | -2.18989600 | 1.33082100  | 2.54035400  | O  | 2.14105500  | 2.35085700  | 2.05271900  |
| C              | -4.66812100 | -2.60881600 | 5.42597800  | O  | 4.38702800  | 2.98377000  | 1.04886300  |
| C              | -3.71755800 | -2.40189700 | 4.25693000  | C  | 4.32421400  | 1.19649300  | 2.99674200  |
| C              | -4.71922100 | -0.19539400 | 4.29000100  | C  | 4.17840300  | 1.85584700  | 4.22180000  |
| C              | -4.29530000 | -0.27182700 | 5.74545600  | C  | 5.13080300  | 0.06389800  | 2.87499600  |
| O              | -4.07338500 | -1.22884400 | 3.50494000  | C  | 4.86097500  | 1.37635100  | 5.33818700  |
| O              | -4.62887700 | -1.52663600 | 6.34809500  | H  | 3.52690200  | 2.72027000  | 4.29445900  |
| H              | -5.80520800 | -0.31774700 | 4.19460300  | C  | 5.80273800  | -0.40956300 | 4.00546800  |
| H              | -4.41365400 | 0.75654100  | 3.85289200  | H  | 5.22090300  | -0.46477700 | 1.93229100  |
| H              | -3.21428500 | -0.08857100 | 5.81955000  | C  | 5.67462600  | 0.24497700  | 5.23098600  |
| H              | -4.80691500 | 0.50796900  | 6.31964900  | H  | 4.75200500  | 1.88219000  | 6.29308000  |
| H              | -2.68543900 | -2.30675800 | 4.62032100  | H  | 6.42552000  | -1.29540900 | 3.92172600  |
| H              | -3.76877500 | -3.25117900 | 3.56784400  | H  | 6.20209400  | -0.12840100 | 6.10412400  |
| H              | -5.68902600 | -2.75516300 | 5.04023400  | C  | 0.75583500  | -1.09883100 | 1.79898300  |
| H              | -4.38755100 | -3.51616700 | 5.97163500  | C  | -0.64717100 | -1.72888000 | 1.90294200  |
| C              | 0.00606800  | -1.98967000 | -2.36901200 | C  | 1.71052000  | -2.29399700 | 1.55078300  |
| H              | 0.78803500  | -2.71547500 | -2.62504500 | H  | 1.51761400  | -2.76119400 | 0.57898700  |
| H              | -0.18535900 | -1.40332500 | -3.27567600 | H  | 2.75465600  | -1.97181200 | 1.57427000  |
| H              | -0.90424200 | -2.54450100 | -2.13691100 | H  | 1.57903300  | -3.05817000 | 2.32537100  |
| <b>INT-4dd</b> |             |             |             | C  | 1.10728300  | -0.44154300 | 3.14464700  |
| C              | 2.17219300  | 0.11727500  | -0.08487300 | H  | 0.98998100  | -1.17181400 | 3.95486400  |
| C              | 2.03481000  | -0.42038300 | -1.43615800 | H  | 2.13989500  | -0.09862900 | 3.16969200  |
| C              | 3.19022200  | -0.47357500 | -2.39537800 | H  | 0.46542900  | 0.41950900  | 3.34423100  |
| C              | 3.33240900  | 0.73522900  | 0.26801000  | C  | -0.11669300 | -0.42671400 | -0.55175200 |
| H              | 3.14748800  | -1.36286500 | -3.02952900 | C  | -1.46065800 | -0.48864100 | -0.43355800 |
| H              | 3.16425500  | 0.38535000  | -3.07615700 | C  | -2.49292200 | -0.55663000 | -1.53177400 |
| H              | 6.11763900  | -4.09066000 | -0.89495900 | C  | -3.61358700 | 0.49730900  | -1.39485500 |
| C              | 5.10262800  | -4.07824300 | -1.29888700 | H  | -2.95705600 | -1.55499700 | -1.56822600 |
| O              | 4.79200700  | -2.78035300 | -1.83641700 | H  | -2.01464900 | -0.40281900 | -2.50221900 |
| H              | 5.01239100  | -4.77081700 | -2.13520400 | C  | -4.61097200 | 0.45665800  | -2.55910000 |
| H              | 4.40037300  | -4.34009600 | -0.50399500 | H  | -4.15855400 | 0.34494400  | -0.45123200 |
| C              | 4.85646000  | -1.75651200 | -0.96225100 | H  | -3.16051600 | 1.49294700  | -1.32005200 |
| C              | 4.54536800  | -0.42437000 | -1.66176000 | C  | -5.73755300 | 1.48521700  | -2.41848900 |
| O              | 5.13961000  | -1.90361800 | 0.20758600  | H  | -4.07279100 | 0.62926600  | -3.50124200 |
| C              | 5.66158300  | -0.16144400 | -2.68878400 | H  | -5.04145000 | -0.55165400 | -2.63567100 |
| O              | 5.49194000  | 0.24441600  | -3.81587700 | H  | -6.43080200 | 1.43701800  | -3.26460500 |
| O              | 6.87336000  | -0.40108500 | -2.15040500 | H  | -6.31678300 | 1.31483400  | -1.50368300 |
| C              | 7.99906900  | -0.13253300 | -3.00715200 | H  | -5.33885700 | 2.50454700  | -2.37091100 |
| H              | 8.01317100  | 0.92036400  | -3.29771600 | H  | -0.72751000 | -2.58707800 | 1.23579100  |
| H              | 8.88082900  | -0.38009900 | -2.41719000 | H  | -0.86383100 | -2.04952400 | 2.92674100  |
| H              | 7.94927200  | -0.74996400 | -3.90711700 | Rh | -2.26659300 | -0.47600800 | 1.43537300  |

|              |             |             |             |    |             |             |             |
|--------------|-------------|-------------|-------------|----|-------------|-------------|-------------|
| C            | -3.18840000 | -2.06310200 | 1.08745400  | H  | 4.93277100  | 0.71481700  | 0.09968800  |
| O            | -3.80968900 | -3.01595800 | 0.90327300  | S  | 3.10645600  | 2.48707300  | 1.47057400  |
| Cl           | -1.71475600 | 1.78807100  | 1.82356500  | O  | 1.84933100  | 2.85482900  | 2.14101300  |
| C            | -4.20412300 | -1.45916600 | 5.74507700  | O  | 3.81807900  | 3.50930800  | 0.67874600  |
| C            | -3.34618500 | -1.63360600 | 4.50077800  | C  | 4.27760500  | 1.92121600  | 2.72684100  |
| C            | -3.82351200 | 0.73084500  | 4.31191700  | C  | 4.95510100  | 2.91906600  | 3.43523900  |
| C            | -3.29119500 | 0.74627100  | 5.73293500  | C  | 4.47731500  | 0.56982000  | 3.00933300  |
| O            | -3.44876000 | -0.49081400 | 3.62967800  | C  | 5.82843500  | 2.55263300  | 4.45709300  |
| O            | -3.79636600 | -0.33927800 | 6.51822800  | H  | 4.80379700  | 3.96227400  | 3.17847700  |
| H            | -4.91782800 | 0.81523800  | 4.30777700  | C  | 5.36489700  | 0.21604400  | 4.02978400  |
| H            | -3.39519700 | 1.54683600  | 3.72783700  | H  | 3.98589700  | -0.19908800 | 2.42357300  |
| H            | -2.19223200 | 0.71528300  | 5.71258900  | C  | 6.03225300  | 1.20212300  | 4.75644600  |
| H            | -3.59042400 | 1.67660900  | 6.22783100  | H  | 6.35518800  | 3.32081800  | 5.01548900  |
| H            | -2.29758700 | -1.77751600 | 4.79335200  | H  | 5.53460600  | -0.83400700 | 4.24847500  |
| H            | -3.67046200 | -2.50928000 | 3.92899400  | H  | 6.71801900  | 0.92084200  | 5.55046600  |
| H            | -5.26254500 | -1.37163600 | 5.45272400  | C  | 0.04235600  | -0.20664300 | 2.13804600  |
| H            | -4.10970000 | -2.34518500 | 6.38233900  | C  | -1.50227600 | -0.33428400 | 2.26724800  |
| C            | 0.25830100  | -1.15099100 | -3.07644300 | C  | 0.63425500  | -1.62524900 | 2.00314400  |
| H            | 1.09290000  | -1.53466100 | -3.66837900 | H  | 0.20312200  | -2.16439000 | 1.15383600  |
| H            | -0.20198100 | -0.34379700 | -3.65939600 | H  | 1.71868600  | -1.59120200 | 1.86527700  |
| H            | -0.48345100 | -1.94952700 | -2.98379400 | H  | 0.42986800  | -2.20561600 | 2.90960200  |
| <b>TS5dd</b> |             |             |             | C  | 0.58264400  | 0.44420500  | 3.42244300  |
| C            | 1.61127300  | 0.56385600  | 0.11357100  | H  | 0.26780000  | -0.14292500 | 4.29388000  |
| C            | 1.39038200  | -0.17701900 | -1.12564800 | H  | 1.67351700  | 0.47908700  | 3.43052900  |
| C            | 2.50182500  | -0.40204600 | -2.10847100 | H  | 0.22334100  | 1.46904000  | 3.53430700  |
| C            | 2.83140600  | 1.11142000  | 0.35327000  | C  | -0.69270000 | -0.02493200 | -0.14437600 |
| H            | 2.36166000  | -1.32235600 | -2.67902800 | C  | -1.96155300 | -0.30626400 | 0.26935200  |
| H            | 2.53490000  | 0.41414900  | -2.84128300 | C  | -2.81754500 | -1.40383000 | -0.34053200 |
| H            | 5.01061400  | -4.13288700 | -0.14866000 | C  | -3.94727700 | -0.95310000 | -1.28791600 |
| C            | 4.04373200  | -4.06611600 | -0.65277600 | H  | -3.26417400 | -1.98911600 | 0.47425400  |
| O            | 3.91792000  | -2.80364200 | -1.33177400 | H  | -2.17062100 | -2.10719200 | -0.87669100 |
| H            | 3.96111800  | -4.82572800 | -1.42946400 | C  | -4.70445100 | -2.13312100 | -1.91057400 |
| H            | 3.24804600  | -4.18277500 | 0.08675700  | H  | -4.64845900 | -0.31243100 | -0.73960400 |
| C            | 4.00534700  | -1.70900300 | -0.55011700 | H  | -3.52916600 | -0.32080300 | -2.08138700 |
| C            | 3.87152800  | -0.43287600 | -1.39706300 | C  | -5.83809700 | -1.69303000 | -2.84255500 |
| O            | 4.16379700  | -1.76165100 | 0.65039700  | H  | -3.99967300 | -2.76738300 | -2.46604000 |
| C            | 4.98902100  | -0.43808000 | -2.45302100 | H  | -5.11312300 | -2.76415500 | -1.10937200 |
| O            | 4.83727300  | -0.21426300 | -3.63207300 | H  | -6.35855900 | -2.55411900 | -3.27424200 |
| O            | 6.18313000  | -0.68490300 | -1.87935900 | H  | -6.58008400 | -1.09101800 | -2.30580000 |
| C            | 7.31573000  | -0.66601300 | -2.76850500 | H  | -5.45681500 | -1.08497600 | -3.67075200 |
| H            | 7.40851800  | 0.31223400  | -3.24554300 | H  | -1.84485800 | -1.36275000 | 2.38673400  |
| H            | 8.18273300  | -0.87225700 | -2.14191500 | H  | -1.85444300 | 0.24070300  | 3.13124500  |
| H            | 7.20625600  | -1.43045900 | -3.54135600 | Rh | -3.12832200 | 1.05485400  | 1.37000400  |
| C            | 0.06429500  | -0.47903100 | -1.30155800 | C  | -4.32636400 | -0.21860800 | 2.00925200  |
| C            | 0.27225700  | 0.63561900  | 0.83332700  | O  | -5.14005200 | -0.92088400 | 2.43460400  |
| H            | 0.00363900  | 1.67434200  | 1.02874300  | Cl | -2.01851800 | 3.01500200  | 0.52748800  |
| C            | 4.03963100  | 0.83009300  | -0.52110500 | C  | -5.59019200 | 4.39137500  | 3.24790300  |
| H            | 4.22361400  | 1.69337200  | -1.17166300 | C  | -4.44425300 | 3.42803100  | 2.98363100  |

|                          |             |             |             |   |             |             |             |
|--------------------------|-------------|-------------|-------------|---|-------------|-------------|-------------|
| C                        | -5.43342300 | 3.23013500  | 0.76673200  | O | 4.17642100  | 2.35316800  | -2.04060500 |
| C                        | -5.32846200 | 4.74056900  | 0.90068000  | C | 2.56679900  | 3.47655500  | -0.25655300 |
| O                        | -4.77761200 | 2.54975800  | 1.87981800  | C | 1.87123000  | 4.68278100  | -0.34654900 |
| O                        | -5.89650900 | 5.20944500  | 2.12000900  | C | 3.19375300  | 3.07853400  | 0.92768400  |
| H                        | -6.48218700 | 2.91114200  | 0.77151500  | C | 1.79269400  | 5.50502100  | 0.77915600  |
| H                        | -4.94862700 | 2.89967200  | -0.15355500 | H | 1.40730600  | 4.96088000  | -1.28641800 |
| H                        | -4.27766900 | 5.04220300  | 0.80389300  | C | 3.10042200  | 3.90672200  | 2.04636600  |
| H                        | -5.89305800 | 5.21165200  | 0.08972100  | H | 3.71851900  | 2.13109700  | 0.98375700  |
| H                        | -3.50976500 | 3.94937700  | 2.75489500  | C | 2.40388200  | 5.11684300  | 1.97292100  |
| H                        | -4.28465900 | 2.77772400  | 3.84746700  | H | 1.25598500  | 6.44736400  | 0.72144300  |
| H                        | -6.48551600 | 3.82200000  | 3.54004000  | H | 3.57554400  | 3.60682000  | 2.97565800  |
| H                        | -5.32098400 | 5.04620100  | 4.08640300  | H | 2.33895900  | 5.75777800  | 2.84753300  |
| C                        | -0.48830400 | -1.11329000 | -2.54853700 | C | -0.49358000 | 1.81571300  | 0.61282300  |
| H                        | 0.17696600  | -0.95102300 | -3.40019900 | C | -0.94319900 | 0.55613700  | 1.37980500  |
| H                        | -0.61358200 | -2.19744800 | -2.43731300 | C | -1.45350100 | -2.53921500 | -0.81448800 |
| H                        | -1.46444900 | -0.69629900 | -2.80464900 | H | -1.09042400 | -3.13311000 | -1.66168400 |
| <b>TS2bb<sup>H</sup></b> |             |             |             | H | -1.14905700 | -3.05968400 | 0.10375300  |
| C                        | 0.87338000  | 0.51209500  | -1.05725500 | H | -2.54169100 | -2.52588500 | -0.87115900 |
| C                        | 0.45859300  | -0.88217300 | -0.89579000 | C | -1.91998200 | -0.08110400 | 0.44496000  |
| Rh                       | -1.92250200 | 0.45611100  | -1.75153200 | C | -3.07602900 | 0.24049700  | -0.02184900 |
| Cl                       | -3.69063800 | -0.97145700 | -2.85667900 | C | -4.52261900 | 0.44423700  | 0.18301600  |
| C                        | 1.48454000  | -1.99100600 | -0.93632300 | C | -4.98179900 | 0.16034200  | 1.62495500  |
| C                        | 2.17309100  | 0.80485500  | -1.34262200 | H | -5.05584700 | -0.19481100 | -0.53223100 |
| H                        | 1.20795200  | -2.79573300 | -0.25040000 | H | -4.77542100 | 1.47532100  | -0.10382200 |
| H                        | 1.51017200  | -2.44727900 | -1.93369100 | C | -6.49280700 | 0.35666900  | 1.80233500  |
| H                        | 4.00806600  | -1.94069400 | 3.25332600  | H | -4.70860300 | -0.86881800 | 1.89015600  |
| C                        | 2.95960400  | -2.15093100 | 3.02925400  | H | -4.44164200 | 0.81688800  | 2.32000900  |
| O                        | 2.76833100  | -2.28919100 | 1.61038400  | C | -6.96809500 | 0.07415400  | 3.23074300  |
| H                        | 2.65775600  | -3.10499200 | 3.46037500  | H | -6.76062500 | 1.38450200  | 1.52259900  |
| H                        | 2.34317500  | -1.33898300 | 3.42266500  | H | -7.02464500 | -0.29859500 | 1.10019600  |
| C                        | 3.10050400  | -1.21174400 | 0.86886800  | H | -8.04883000 | 0.21937300  | 3.32550500  |
| C                        | 2.91684400  | -1.50866100 | -0.62729000 | H | -6.74383700 | -0.95692900 | 3.52656800  |
| O                        | 3.49476500  | -0.17264900 | 1.35102200  | H | -6.47888800 | 0.73921500  | 3.95161200  |
| C                        | 3.91115400  | -2.61533700 | -1.02257700 | H | -0.10210100 | -0.10693900 | 1.59917400  |
| O                        | 3.67201600  | -3.52563100 | -1.78352800 | H | -1.44310200 | 0.81781600  | 2.31895100  |
| O                        | 5.11313500  | -2.40745600 | -0.45268800 | C | -2.93301300 | 2.04184500  | -2.41488700 |
| C                        | 6.14232700  | -3.35111500 | -0.80580400 | O | -3.59028400 | 2.93177400  | -2.71118600 |
| H                        | 6.31637300  | -3.33798300 | -1.88403000 | C | -0.48173100 | 1.58704000  | -4.51688100 |
| H                        | 7.03273200  | -3.02656600 | -0.26864500 | C | 0.67700700  | 1.42599400  | -5.49061100 |
| H                        | 5.85369900  | -4.36043900 | -0.50332200 | C | 0.37354100  | -0.88594300 | -5.52121600 |
| C                        | -0.88900900 | -1.14576000 | -0.86898000 | C | -0.79673900 | -0.76884500 | -4.55497200 |
| C                        | -0.25100000 | 1.50202200  | -0.88289300 | O | 0.49805700  | 0.28243600  | -6.31837700 |
| H                        | -0.07166200 | 2.42173700  | -1.43554600 | O | -0.61294300 | 0.39302700  | -3.71140500 |
| C                        | 3.24777200  | -0.25361600 | -1.46841600 | H | 1.30530300  | -1.06700300 | -4.95935100 |
| H                        | 3.35589000  | -0.56320900 | -2.51694000 | H | 0.21041200  | -1.72602500 | -6.20366000 |
| H                        | 4.21285900  | 0.15248800  | -1.16557700 | H | -1.74737700 | -0.67356600 | -5.09058600 |
| S                        | 2.73714900  | 2.46593100  | -1.74309900 | H | -0.86232700 | -1.62903100 | -3.88843300 |
| O                        | 1.83773000  | 3.06311200  | -2.75849300 | H | 0.73388000  | 2.29619300  | -6.15111200 |



|                            |             |             |             |                          |             |             |             |
|----------------------------|-------------|-------------|-------------|--------------------------|-------------|-------------|-------------|
| H                          | 1.61673100  | 1.35690200  | -4.92421700 | H                        | 1.97432300  | 5.59440300  | 3.22585000  |
| H                          | -0.28104400 | 2.41021300  | -3.83190100 | C                        | -0.87194600 | 1.83175600  | 0.66261800  |
| H                          | -1.42349000 | 1.75473900  | -5.05782500 | C                        | -1.18742800 | 0.56776200  | 1.50211300  |
| H                          | 0.41337500  | 2.23716200  | 1.06388100  | C                        | -1.32833200 | -2.70448400 | -0.35972300 |
| H                          | -1.28424300 | 2.56959100  | 0.68926600  | H                        | -0.91847200 | -3.23721300 | -1.21953700 |
| <b>INT-3bb<sup>H</sup></b> |             |             |             | H                        | -0.99788600 | -3.21544900 | 0.55532000  |
| C                          | 0.70030200  | 0.57646900  | -0.88750100 | H                        | -2.41501200 | -2.77408200 | -0.41244200 |
| C                          | 0.36316400  | -0.85129300 | -0.70561900 | C                        | -1.84921000 | -0.36775000 | 0.49961400  |
| Rh                         | -1.93591600 | 0.23434500  | -1.86543600 | C                        | -2.94088200 | 0.08332000  | -0.14998900 |
| Cl                         | -3.37493500 | -1.53258300 | -2.83892700 | C                        | -4.27383000 | 0.63845800  | 0.18611100  |
| C                          | 1.40226200  | -1.87325200 | -1.10025000 | C                        | -4.74339700 | 0.42380600  | 1.63607200  |
| C                          | 1.97145100  | 0.92834600  | -1.23452300 | H                        | -4.98898900 | 0.16273100  | -0.50155700 |
| H                          | 1.21349000  | -2.83188000 | -0.61764900 | H                        | -4.30304200 | 1.70836200  | -0.07294700 |
| H                          | 1.36190600  | -2.05376000 | -2.18087100 | C                        | -6.19827900 | 0.86320700  | 1.84676800  |
| H                          | 4.05431000  | -2.28203200 | 3.00138100  | H                        | -4.63383000 | -0.63677600 | 1.89380500  |
| C                          | 3.02531700  | -2.55358900 | 2.75465900  | H                        | -4.09554800 | 0.98069500  | 2.32473700  |
| O                          | 2.82293500  | -2.50667000 | 1.33073000  | C                        | -6.67800200 | 0.67148200  | 3.28885300  |
| H                          | 2.81792600  | -3.58257300 | 3.04650100  | H                        | -6.30446000 | 1.91890200  | 1.56215600  |
| H                          | 2.34457100  | -1.86522500 | 3.26119400  | H                        | -6.84671500 | 0.29740300  | 1.16484500  |
| C                          | 3.04409600  | -1.31133900 | 0.74821100  | H                        | -7.71848000 | 0.99018900  | 3.40714100  |
| C                          | 2.83468900  | -1.40680100 | -0.77117600 | H                        | -6.61586500 | -0.38002200 | 3.59075500  |
| O                          | 3.35968400  | -0.31747500 | 1.36543400  | H                        | -6.07028700 | 1.25390000  | 3.99083200  |
| C                          | 3.83278200  | -2.42691500 | -1.34313200 | H                        | -0.27509800 | 0.10782600  | 1.89797900  |
| O                          | 3.57275500  | -3.25142000 | -2.19004300 | H                        | -1.84121300 | 0.81254100  | 2.34396300  |
| O                          | 5.05802500  | -2.24459600 | -0.81685000 | C                        | -2.96266400 | 1.58405500  | -2.66601500 |
| C                          | 6.09118600  | -3.10902500 | -1.32767500 | O                        | -3.64999500 | 2.39094300  | -3.11047600 |
| H                          | 6.21087400  | -2.96346800 | -2.40357700 | C                        | -0.12962400 | 1.30005600  | -4.59744900 |
| H                          | 6.99905600  | -2.82346400 | -0.79776400 | C                        | 1.07811200  | 1.10195700  | -5.50256700 |
| H                          | 5.84187500  | -4.15488300 | -1.13434600 | C                        | 0.65548600  | -1.19442100 | -5.59945700 |
| C                          | -0.90957400 | -1.24880000 | -0.32228500 | C                        | -0.56300400 | -1.02336500 | -4.70263600 |
| C                          | -0.47322900 | 1.50751000  | -0.79820700 | O                        | 0.90159800  | -0.01931500 | -6.36029000 |
| H                          | -0.30885500 | 2.42535800  | -1.35564600 | O                        | -0.36569400 | 0.10457500  | -3.82470700 |
| C                          | 3.11054200  | -0.04484600 | -1.43709700 | H                        | 1.53818100  | -1.44408100 | -4.98622100 |
| H                          | 3.26795900  | -0.20917400 | -2.51171500 | H                        | 0.48875200  | -2.00821900 | -6.31213700 |
| H                          | 4.04162500  | 0.37338800  | -1.05436200 | H                        | -1.46732600 | -0.86007400 | -5.30190400 |
| S                          | 2.45055800  | 2.63479500  | -1.57507800 | H                        | -0.73064800 | -1.89517700 | -4.06872600 |
| O                          | 1.51715000  | 3.25163400  | -2.54629200 | H                        | 1.21992500  | 1.97760000  | -6.14270300 |
| O                          | 3.88790500  | 2.60095100  | -1.89862100 | H                        | 1.98142000  | 0.97496400  | -4.88459000 |
| C                          | 2.25361000  | 3.53564600  | -0.02444000 | H                        | 0.05587200  | 2.10839900  | -3.89019500 |
| C                          | 1.58380600  | 4.75929700  | -0.04917500 | H                        | -1.02282200 | 1.51664900  | -5.20178600 |
| C                          | 2.83470000  | 3.03939800  | 1.14620300  | H                        | -0.06812400 | 2.41563500  | 1.12921500  |
| C                          | 1.48703200  | 5.50094900  | 1.12969900  | H                        | -1.76321500 | 2.46953500  | 0.64274700  |
| H                          | 1.14845100  | 5.11077100  | -0.97815500 | <b>TS3bb<sup>H</sup></b> |             |             |             |
| C                          | 2.72333100  | 3.78844700  | 2.31782700  | C                        | 0.01418000  | -1.30982400 | 0.48741400  |
| H                          | 3.33817200  | 2.07782800  | 1.15201700  | C                        | 0.20704100  | -2.72581400 | 0.15132000  |
| C                          | 2.05400600  | 5.01601000  | 2.30989000  | Rh                       | -0.80479000 | -0.41970300 | -2.56165700 |
| H                          | 0.96891300  | 6.45530900  | 1.12450400  | Cl                       | -0.18938100 | -0.27535900 | -4.90922800 |
| H                          | 3.16184700  | 3.41251600  | 3.23734600  | C                        | 1.37678800  | -3.48295800 | 0.72939300  |

|   |             |             |             |                           |             |             |             |
|---|-------------|-------------|-------------|---------------------------|-------------|-------------|-------------|
| C | 0.84346800  | -0.69350700 | 1.36207000  | H                         | -2.12104800 | -3.95006000 | -3.68718300 |
| H | 1.14784700  | -4.54165600 | 0.86540900  | H                         | -1.26554100 | -2.80130600 | -4.75383300 |
| H | 2.21758200  | -3.44443600 | 0.02703700  | C                         | -3.82597000 | -3.18153300 | -5.74626900 |
| H | 0.35951900  | -4.70173400 | 5.36325900  | H                         | -4.13632400 | -2.41964800 | -3.74408000 |
| C | -0.04408800 | -5.03500400 | 4.40435600  | H                         | -3.23732200 | -1.32406600 | -4.79646700 |
| O | 0.79182500  | -4.58234100 | 3.32419900  | C                         | -5.15123700 | -2.67183900 | -6.32175000 |
| H | -0.04002500 | -6.12276600 | 4.34225100  | H                         | -3.04757200 | -3.13414400 | -6.51853400 |
| H | -1.05903000 | -4.64648300 | 4.29160200  | H                         | -3.92670000 | -4.24118300 | -5.47319000 |
| C | 0.93823800  | -3.24561900 | 3.22029300  | H                         | -5.45772500 | -3.25788200 | -7.19433200 |
| C | 1.88683800  | -2.89512000 | 2.06323800  | H                         | -5.95657100 | -2.73277500 | -5.58051600 |
| O | 0.38725300  | -2.45873900 | 3.95809400  | H                         | -5.06795500 | -1.62553300 | -6.63533500 |
| C | 3.26401500  | -3.50943500 | 2.37695900  | H                         | -3.39934600 | -3.07991000 | -0.25965600 |
| O | 3.95530500  | -4.11172500 | 1.58737000  | H                         | -3.76021500 | -1.69526700 | -1.30953900 |
| O | 3.62330100  | -3.24567400 | 3.64671100  | C                         | 2.43645500  | -0.81705500 | -2.52955900 |
| C | 4.92495000  | -3.72267600 | 4.03867400  | C                         | 3.89835800  | -0.46102500 | -2.20466900 |
| H | 5.69905700  | -3.26707900 | 3.41723200  | C                         | 3.34429400  | 1.52259600  | -1.08684100 |
| H | 5.04330300  | -3.42510600 | 5.07982200  | C                         | 2.12282500  | 1.48309200  | -2.02765100 |
| H | 4.97864200  | -4.80908900 | 3.93719900  | O                         | 3.95988300  | 0.23604900  | -0.97167900 |
| C | -0.67477300 | -3.23076200 | -0.74274400 | O                         | 1.54596900  | 0.17399600  | -1.98434600 |
| C | -1.18275200 | -0.69138600 | -0.14825400 | H                         | 4.07351300  | 2.26229900  | -1.45674300 |
| H | -1.07152600 | 0.38288900  | -0.22529800 | H                         | 3.04170600  | 1.80455000  | -0.07714000 |
| C | 2.06061900  | -1.36164800 | 1.95751800  | H                         | 1.35579100  | 2.17348300  | -1.67916100 |
| H | 2.92238000  | -1.14444400 | 1.31087700  | H                         | 2.38678500  | 1.73480400  | -3.06356900 |
| H | 2.28593500  | -0.94414700 | 2.93826000  | H                         | 4.49791500  | -1.36977000 | -2.09795800 |
| S | 0.62954200  | 1.04390600  | 1.84273700  | H                         | 4.34785700  | 0.14020000  | -3.01088800 |
| O | 0.46809100  | 1.87968300  | 0.63254300  | H                         | 2.27200800  | -0.90838300 | -3.61076300 |
| O | 1.72190300  | 1.34461300  | 2.78342700  | H                         | 2.14582200  | -1.75525300 | -2.04887500 |
| C | -0.93162700 | 1.14955700  | 2.74297800  | C                         | -1.59723100 | 1.40727100  | -2.63795100 |
| C | -1.89660000 | 2.05166400  | 2.29144600  | O                         | -2.35409800 | 2.24543200  | -2.86267000 |
| C | -1.11491800 | 0.40153100  | 3.90896900  | H                         | -2.44739700 | -1.55440100 | 1.42304300  |
| C | -3.07909000 | 2.19746800  | 3.01917000  | H                         | -3.23470000 | -0.26377500 | 0.51871000  |
| H | -1.71074700 | 2.62835800  | 1.39199400  | <b>INT-2d<sup>H</sup></b> |             |             |             |
| C | -2.30509800 | 0.55266500  | 4.62087500  | C                         | -1.11360300 | -4.74176200 | -5.54842500 |
| H | -0.35755900 | -0.29903800 | 4.24142600  | C                         | -1.24141200 | -3.21616700 | -5.76554500 |
| C | -3.28360900 | 1.44763600  | 4.17928000  | H                         | -0.27122500 | -2.74794900 | -5.55492700 |
| H | -3.83579200 | 2.89892700  | 2.68073800  | H                         | -1.46735000 | -3.03599400 | -6.81922400 |
| H | -2.46479000 | -0.02754900 | 5.52474200  | C                         | -1.26009300 | -5.08084800 | -4.04418400 |
| H | -4.20537300 | 1.56275700  | 4.74226300  | H                         | -1.13448100 | -6.15221300 | -3.89251500 |
| C | -2.56008500 | -1.11829200 | 0.42523200  | H                         | -0.45629700 | -4.57051000 | -3.50125300 |
| C | -3.01390100 | -2.12438600 | -0.63614000 | C                         | -2.30581100 | -2.55217200 | -4.90603300 |
| C | -0.72199000 | -4.66009900 | -1.21359000 | C                         | -2.95519300 | -3.17477000 | -3.87761800 |
| H | -0.16071600 | -5.32745100 | -0.55671900 | C                         | -4.11280700 | -2.68133700 | -3.04649800 |
| H | -1.75496700 | -5.02390800 | -1.26348000 | H                         | -4.59555300 | -1.83710500 | -3.52924600 |
| H | -0.30200800 | -4.75738200 | -2.22258300 | C                         | -3.88430000 | -2.26096600 | -1.53978700 |
| C | -1.67118500 | -2.28809500 | -1.37385600 | C                         | -5.25355600 | -1.61510900 | -1.12314700 |
| C | -1.55735700 | -2.09351800 | -2.78688500 | H                         | -5.56210400 | -0.95530600 | -1.94428800 |
| C | -2.01567300 | -2.89154000 | -3.96139000 | H                         | -6.01467400 | -2.40184400 | -1.07528800 |
| C | -3.36510400 | -2.37677900 | -4.52494800 | C                         | -5.34258400 | -0.83233700 | 0.11251800  |

|    |             |             |             |                          |             |             |             |
|----|-------------|-------------|-------------|--------------------------|-------------|-------------|-------------|
| C  | -5.52582100 | -0.16568600 | 1.10697500  | C                        | -3.61610700 | -6.76979700 | -2.64951400 |
| C  | -5.71651500 | 0.65198300  | 2.30659800  | H                        | -4.26692900 | -7.40602100 | -3.25545400 |
| C  | -5.46428100 | 2.15658800  | 2.07453800  | H                        | -2.60078100 | -7.18027000 | -2.63596000 |
| H  | -5.05175900 | 0.29157900  | 3.10455100  | H                        | -3.99769200 | -6.80047900 | -1.62133800 |
| H  | -6.73919800 | 0.51052700  | 2.68355800  | C                        | -7.96821400 | -3.83494600 | -6.91124100 |
| C  | -5.67185500 | 2.99454600  | 3.34131900  | C                        | -8.07473200 | -3.60895000 | -5.40931000 |
| H  | -4.44143900 | 2.29330100  | 1.70128500  | C                        | -6.55661600 | -1.80049500 | -5.60853400 |
| H  | -6.13154700 | 2.51143100  | 1.27923100  | C                        | -6.45711400 | -2.06115500 | -7.10449600 |
| C  | -5.41885200 | 4.48900300  | 3.11952200  | O                        | -6.84613600 | -3.03228500 | -4.90454200 |
| H  | -6.69628900 | 2.84707200  | 3.70991300  | O                        | -7.67292100 | -2.61972400 | -7.59149200 |
| H  | -5.00789400 | 2.62402500  | 4.13446500  | H                        | -5.62681700 | -1.39799900 | -5.21033800 |
| H  | -5.57516300 | 5.06137900  | 4.03962300  | H                        | -7.36930500 | -1.09098900 | -5.40008800 |
| H  | -4.39147200 | 4.67151200  | 2.78450500  | H                        | -6.29270200 | -1.12108700 | -7.63820700 |
| H  | -6.09167000 | 4.89572500  | 2.35613700  | H                        | -5.60738500 | -2.72836400 | -7.31269300 |
| C  | -2.61103500 | -4.59253400 | -3.59710500 | H                        | -8.89204600 | -2.91070900 | -5.18026800 |
| C  | -3.63007600 | -5.37133600 | -3.15976600 | H                        | -8.22194800 | -4.55105900 | -4.88246400 |
| C  | -2.20989700 | -5.46516200 | -6.35652100 | H                        | -7.19364100 | -4.59033300 | -7.10544400 |
| O  | -3.06405100 | -4.91273300 | -7.01152800 | H                        | -8.92355500 | -4.19763000 | -7.30397400 |
| O  | -2.09822700 | -6.79648700 | -6.21942600 | C                        | -2.75965900 | -1.16821200 | -1.57486800 |
| C  | 0.26271000  | -5.20244900 | -6.04455000 | C                        | -2.09790700 | -0.72308600 | -0.25865500 |
| O  | 1.16312300  | -5.59429500 | -5.33684100 | H                        | -3.16345300 | -0.28770100 | -2.08699500 |
| O  | 0.35451000  | -5.07843400 | -7.38295900 | H                        | -1.95700800 | -1.54631300 | -2.22023200 |
| C  | -3.11095800 | -7.57723900 | -6.89730200 | C                        | -1.04958500 | 0.37028400  | -0.50187200 |
| H  | -3.09372000 | -7.36359600 | -7.96826400 | H                        | -2.85038900 | -0.35249400 | 0.44070200  |
| H  | -2.84611800 | -8.61700800 | -6.70750300 | H                        | -1.60636700 | -1.57650000 | 0.22245200  |
| H  | -4.09706600 | -7.34277700 | -6.49011800 | H                        | -0.56986700 | 0.67479100  | 0.43436000  |
| C  | 1.61416000  | -5.47082700 | -7.95914000 | H                        | -0.25879100 | 0.02357700  | -1.17830500 |
| H  | 1.50964500  | -5.30532800 | -9.03083000 | H                        | -1.50281400 | 1.26454000  | -0.94592600 |
| H  | 2.42633900  | -4.86419500 | -7.55157600 | C                        | -3.47465400 | -3.45168500 | -0.62497100 |
| H  | 1.81712800  | -6.52353900 | -7.74918800 | C                        | -3.74905400 | -3.37563000 | 0.88843100  |
| S  | -2.69368600 | -0.89606100 | -5.51331300 | H                        | -2.40587300 | -3.65145800 | -0.78104600 |
| O  | -3.14311200 | -1.05367700 | -6.91010900 | H                        | -3.98191000 | -4.35110600 | -0.97929600 |
| O  | -3.55557300 | -0.17201500 | -4.55723800 | C                        | -3.22696800 | -4.62591700 | 1.60727200  |
| C  | -1.11350200 | -0.02862400 | -5.56892800 | H                        | -3.29855100 | -2.48659600 | 1.33468200  |
| C  | -0.42618900 | 0.04933400  | -6.78214700 | H                        | -4.82595400 | -3.28328600 | 1.06540000  |
| C  | -0.62553400 | 0.58460900  | -4.41254000 | H                        | -3.43948200 | -4.58428300 | 2.68047000  |
| C  | 0.78417300  | 0.74264700  | -6.82959700 | H                        | -3.69249300 | -5.53780400 | 1.21425700  |
| H  | -0.85075800 | -0.40857000 | -7.66883000 | H                        | -2.14234000 | -4.73255300 | 1.48701100  |
| C  | 0.58646400  | 1.27181500  | -4.47264200 | <b>TS2dd<sup>H</sup></b> |             |             |             |
| H  | -1.19347300 | 0.53904200  | -3.49092000 | C                        | 0.70528100  | 0.62262700  | -0.88936600 |
| C  | 1.29104100  | 1.34753400  | -5.67727000 | C                        | 0.31253700  | -0.77844800 | -0.69267300 |
| H  | 1.32611400  | 0.81587300  | -7.76764800 | Rh                       | -2.01313500 | 0.53917600  | -1.67988200 |
| H  | 0.97489100  | 1.75544800  | -3.58149400 | Cl                       | -3.65464400 | -0.89438800 | -2.95672500 |
| H  | 2.23271000  | 1.88702300  | -5.71942700 | C                        | 1.34202300  | -1.88487800 | -0.66603300 |
| Rh | -5.26795500 | -4.36936300 | -3.67939500 | C                        | 1.97049700  | 0.89480700  | -1.32976900 |
| Cl | -6.21206100 | -6.34551500 | -4.86748000 | H                        | 1.12357200  | -2.58970500 | 0.14200800  |
| C  | -6.21806600 | -4.65653000 | -2.15850100 | H                        | 1.29036100  | -2.47338000 | -1.58992100 |
| O  | -6.84480600 | -4.92230600 | -1.22958100 | H                        | 4.24894600  | -1.48043400 | 3.22883100  |

|   |             |             |             |                           |             |             |             |
|---|-------------|-------------|-------------|---------------------------|-------------|-------------|-------------|
| C | 3.17454800  | -1.65702800 | 3.14034200  | H                         | -4.86991000 | 0.85942800  | 2.15214300  |
| O | 2.82020700  | -1.91648000 | 1.77022400  | C                         | -7.42973900 | 0.04283800  | 2.89293400  |
| H | 2.88375100  | -2.55054100 | 3.69202000  | H                         | -7.13751200 | 1.28770100  | 1.14826400  |
| H | 2.63836200  | -0.78222800 | 3.51601900  | H                         | -7.29762600 | -0.42157800 | 0.78364800  |
| C | 3.14335000  | -0.94814300 | 0.88912800  | H                         | -8.51957400 | 0.14443100  | 2.89496500  |
| C | 2.79008300  | -1.37446400 | -0.54450700 | H                         | -7.18875300 | -0.96403500 | 3.25204200  |
| O | 3.66231800  | 0.09862600  | 1.21264400  | H                         | -7.02758400 | 0.75849600  | 3.61910500  |
| C | 3.75131000  | -2.50741800 | -0.95376900 | H                         | -0.44794600 | -0.10168200 | 1.76073600  |
| O | 3.45128800  | -3.45833500 | -1.63974400 | H                         | -1.83664600 | 0.78061500  | 2.42508000  |
| O | 4.99586900  | -2.27612900 | -0.49506100 | C                         | -3.00725700 | 2.11504200  | -2.39521000 |
| C | 5.99035100  | -3.24600200 | -0.87666800 | O                         | -3.67084700 | 2.98522800  | -2.73294100 |
| H | 6.08320400  | -3.28723700 | -1.96419500 | C                         | -0.70490700 | 1.64048900  | -4.50912700 |
| H | 6.92031100  | -2.90404200 | -0.42395700 | C                         | 0.42683000  | 1.60115600  | -5.52740100 |
| H | 5.71909600  | -4.23640900 | -0.50399900 | C                         | 0.56751100  | -0.71437000 | -5.33701300 |
| C | -1.03010900 | -1.06052700 | -0.74578800 | C                         | -0.56951100 | -0.72726300 | -4.32451800 |
| C | -0.41302700 | 1.60096200  | -0.65178100 | O                         | 0.43012600  | 0.37017800  | -6.24223900 |
| H | -0.22806300 | 2.54222600  | -1.16308000 | O                         | -0.59435900 | 0.52383000  | -3.59668100 |
| C | 3.00638700  | -0.19720000 | -1.52482600 | H                         | 1.53743300  | -0.65455100 | -4.81536000 |
| H | 2.95585600  | -0.59300200 | -2.54773000 | H                         | 0.54690900  | -1.63473100 | -5.92933000 |
| H | 4.01346900  | 0.20082700  | -1.40469000 | H                         | -1.53761500 | -0.87447300 | -4.81396500 |
| S | 2.49663200  | 2.48362300  | -1.99595500 | H                         | -0.43220600 | -1.51260600 | -3.57955500 |
| O | 1.34096200  | 3.19342100  | -2.59065100 | H                         | 0.29049100  | 2.39910400  | -6.26381000 |
| O | 3.65818300  | 2.17604600  | -2.85208900 | H                         | 1.38843000  | 1.75530600  | -5.01722400 |
| C | 3.09358300  | 3.54827400  | -0.66320600 | H                         | -0.63001300 | 2.54209600  | -3.90164400 |
| C | 2.53114300  | 4.81968200  | -0.53564800 | H                         | -1.67984500 | 1.58853700  | -5.01255400 |
| C | 4.15833000  | 3.13958300  | 0.14404800  | C                         | 0.57729700  | 2.34843300  | 1.60791500  |
| C | 3.04302100  | 5.69677400  | 0.42243000  | C                         | 0.64329000  | 2.18336000  | 3.13980800  |
| H | 1.71626500  | 5.10794200  | -1.18994000 | H                         | 0.76425400  | 3.39909500  | 1.35403600  |
| C | 4.65487600  | 4.02223000  | 1.10261300  | H                         | 1.42487400  | 1.79059200  | 1.20026500  |
| H | 4.57637200  | 2.14491800  | 0.04993200  | C                         | 1.99803000  | 2.64031800  | 3.69583700  |
| C | 4.10239900  | 5.29882800  | 1.24028000  | H                         | -0.15806300 | 2.73711800  | 3.63756700  |
| H | 2.61688500  | 6.69043800  | 0.52491200  | H                         | 0.49308900  | 1.12953000  | 3.40737900  |
| H | 5.47738600  | 3.71264300  | 1.74023000  | H                         | 2.04365800  | 2.51214200  | 4.78290800  |
| H | 4.50038400  | 5.98346400  | 1.98378300  | H                         | 2.81749200  | 2.06763200  | 3.24864800  |
| C | -0.72455200 | 1.89172500  | 0.87400600  | H                         | 2.18091600  | 3.69772400  | 3.47596200  |
| C | -1.26639600 | 0.57847700  | 1.51230400  | C                         | -1.79892500 | 3.01399100  | 0.88868100  |
| C | -1.57309900 | -2.46252400 | -0.73394900 | C                         | -2.22781100 | 3.62803600  | 2.22997600  |
| H | -1.15973900 | -3.04097600 | -1.56911900 | H                         | -2.69721500 | 2.63570100  | 0.38852700  |
| H | -1.30328900 | -2.98872500 | 0.19202000  | H                         | -1.42544700 | 3.82532700  | 0.24952800  |
| H | -2.65747900 | -2.46685300 | -0.84202200 | C                         | -3.40903000 | 4.59172500  | 2.05886500  |
| C | -2.16169500 | -0.01811100 | 0.48546700  | H                         | -2.50900600 | 2.84355800  | 2.94510500  |
| C | -3.29793500 | 0.26334000  | -0.04676400 | H                         | -1.39175100 | 4.17189900  | 2.68315000  |
| C | -4.76439300 | 0.39689200  | 0.03431800  | H                         | -3.69538400 | 5.04511600  | 3.01334600  |
| C | -5.32447300 | 0.15043100  | 1.44757600  | H                         | -3.16071500 | 5.40384900  | 1.36618300  |
| H | -5.20577300 | -0.29883700 | -0.69042900 | H                         | -4.28898600 | 4.07595700  | 1.65755000  |
| H | -5.04726900 | 1.39855700  | -0.31898200 | <b>INT-2e<sup>H</sup></b> |             |             |             |
| C | -6.85183500 | 0.28558500  | 1.49529200  | C                         | -1.17208100 | -4.74299400 | -5.62206100 |
| H | -5.03099400 | -0.85326300 | 1.78025900  | C                         | -1.28511000 | -3.21375500 | -5.81448400 |

|   |             |             |             |                          |             |             |             |
|---|-------------|-------------|-------------|--------------------------|-------------|-------------|-------------|
| H | -0.30172600 | -2.76273100 | -5.62842700 | C                        | -0.32341600 | 0.06312800  | -6.59609100 |
| H | -1.54199100 | -3.01317800 | -6.85717500 | C                        | -0.66980800 | 0.60680600  | -4.24571700 |
| C | -1.26589500 | -5.09527900 | -4.11699900 | C                        | 0.89354300  | 0.74564900  | -6.56759000 |
| H | -1.14356100 | -6.16892400 | -3.97921300 | H                        | -0.69489700 | -0.39095300 | -7.50810100 |
| H | -0.43886600 | -4.59546100 | -3.59967200 | C                        | 0.54893100  | 1.28474700  | -4.23020100 |
| C | -2.31402800 | -2.54913400 | -4.91292400 | H                        | -1.29845700 | 0.56954600  | -3.36387800 |
| C | -2.94633400 | -3.18175700 | -3.87946100 | C                        | 1.33056600  | 1.34992400  | -5.38673100 |
| C | -4.08826900 | -2.69818000 | -3.01913700 | H                        | 1.49478900  | 0.81212500  | -7.46929900 |
| H | -4.58802500 | -1.85566900 | -3.48761200 | H                        | 0.88347700  | 1.76936900  | -3.31800900 |
| C | -3.82156100 | -2.27861000 | -1.51859200 | H                        | 2.27754900  | 1.88138600  | -5.36965400 |
| C | -5.18609500 | -1.66507900 | -1.04498100 | Rh                       | -5.24559500 | -4.39900900 | -3.61747300 |
| H | -5.55802700 | -1.02974400 | -1.85916600 | Cl                       | -6.24298200 | -6.42835400 | -4.68478200 |
| H | -5.92045100 | -2.47137500 | -0.94069500 | C                        | -6.17185300 | -4.68288200 | -2.08009900 |
| C | -5.22686500 | -0.86342500 | 0.18124800  | O                        | -6.77920200 | -4.94914000 | -1.13898400 |
| C | -5.36638200 | -0.18817300 | 1.17689500  | C                        | -3.54541000 | -6.77171200 | -2.59763400 |
| C | -5.50506300 | 0.63756700  | 2.37810600  | H                        | -4.20214900 | -7.42696400 | -3.17631200 |
| C | -5.46002500 | 2.15390400  | 2.09515800  | H                        | -2.52392400 | -7.16678800 | -2.60185800 |
| H | -4.71033700 | 0.37883700  | 3.09232100  | H                        | -3.90190500 | -6.79111900 | -1.56030900 |
| H | -6.45043200 | 0.39129700  | 2.88167000  | C                        | -7.77961700 | -3.98413200 | -6.94535600 |
| C | -5.59542800 | 2.99732900  | 3.36796200  | C                        | -7.99497700 | -3.69119000 | -5.46674800 |
| H | -4.51711500 | 2.39395300  | 1.58780000  | C                        | -6.47516400 | -1.88459000 | -5.63885600 |
| H | -6.26155900 | 2.40946200  | 1.39097900  | C                        | -6.26264000 | -2.21184400 | -7.10969100 |
| C | -5.54813600 | 4.50430000  | 3.09681400  | O                        | -6.80475800 | -3.08809200 | -4.90263000 |
| H | -6.53856200 | 2.74521400  | 3.87205600  | O                        | -7.43820700 | -2.79999000 | -7.65799600 |
| H | -4.79470100 | 2.72577700  | 4.06958700  | H                        | -5.58439200 | -1.44989800 | -5.18915500 |
| H | -5.64799300 | 5.07997100  | 4.02270500  | H                        | -7.30933200 | -1.17897100 | -5.52386900 |
| H | -4.60147600 | 4.79265400  | 2.62593500  | H                        | -6.06150900 | -1.29646300 | -7.67259200 |
| H | -6.35745900 | 4.81149700  | 2.42491500  | H                        | -5.39811300 | -2.88306200 | -7.22413100 |
| C | -2.59631400 | -4.60111500 | -3.61644000 | H                        | -8.82546000 | -2.98492800 | -5.32826500 |
| C | -3.59210500 | -5.38188400 | -3.12880300 | H                        | -8.17984600 | -4.60842700 | -4.90902400 |
| C | -2.31063300 | -5.44215600 | -6.39146300 | H                        | -6.99064700 | -4.74263500 | -7.04733600 |
| O | -3.19884700 | -4.87099300 | -6.98322200 | H                        | -8.70268700 | -4.37048800 | -7.38937300 |
| O | -2.19580600 | -6.77617800 | -6.29664400 | C                        | -2.72382200 | -1.16128400 | -1.59170100 |
| C | 0.17696600  | -5.21757400 | -6.17620900 | C                        | -2.00543100 | -0.72567300 | -0.30553600 |
| O | 1.09792900  | -5.63054400 | -5.50811400 | H                        | -3.17433100 | -0.28444500 | -2.06738800 |
| O | 0.21891700  | -5.07803200 | -7.51549100 | H                        | -1.95057400 | -1.51285200 | -2.28349400 |
| C | -3.24393200 | -7.53955900 | -6.94004900 | H                        | -1.29835000 | 0.07638000  | -0.54906700 |
| H | -3.29285100 | -7.28705100 | -8.00145300 | H                        | -2.69440000 | -0.34323100 | 0.44791300  |
| H | -2.96234000 | -8.58335100 | -6.80453100 | H                        | -1.42311600 | -1.53989600 | 0.13585100  |
| H | -4.20471800 | -7.32845100 | -6.46503900 | C                        | -3.35715300 | -3.46209200 | -0.62196000 |
| C | 1.44940300  | -5.48164100 | -8.14471900 | C                        | -3.55064700 | -3.36594500 | 0.90023000  |
| H | 1.30804100  | -5.29650500 | -9.20893100 | H                        | -2.29951400 | -3.65979000 | -0.83768800 |
| H | 2.28646400  | -4.89562900 | -7.75794900 | H                        | -3.88438800 | -4.36189000 | -0.94297100 |
| H | 1.64161000  | -6.54099600 | -7.95950000 | H                        | -3.15648600 | -4.27742600 | 1.36409200  |
| S | -2.67238300 | -0.86994000 | -5.47413500 | H                        | -3.04020300 | -2.51543500 | 1.35217700  |
| O | -3.05839400 | -0.97615300 | -6.89448100 | H                        | -4.60696100 | -3.29092600 | 1.17120600  |
| O | -3.57357500 | -0.17756100 | -4.53161500 | <b>TS2ee<sup>H</sup></b> |             |             |             |
| C | -1.08771100 | -0.00746200 | -5.42902800 | C                        | 0.68758200  | 0.69502100  | -0.83466300 |

|    |             |             |             |   |             |             |             |
|----|-------------|-------------|-------------|---|-------------|-------------|-------------|
| C  | 0.30071200  | -0.71133700 | -0.65858800 | C | -2.16546500 | 0.03994500  | 0.57276700  |
| Rh | -2.04875300 | 0.57344300  | -1.60743800 | C | -3.30568700 | 0.32274100  | 0.04894600  |
| Cl | -3.71193000 | -0.89116000 | -2.83045200 | C | -4.77108100 | 0.46449300  | 0.14623900  |
| C  | 1.32877500  | -1.81826500 | -0.70060100 | C | -5.35524400 | -0.08403400 | 1.46150800  |
| C  | 1.96206600  | 0.98432900  | -1.23804100 | H | -5.21612300 | -0.04622700 | -0.71603400 |
| H  | 1.10431700  | -2.57882200 | 0.05249300  | H | -5.02617300 | 1.52886900  | 0.02888900  |
| H  | 1.28040400  | -2.33717700 | -1.66557600 | C | -6.88023800 | 0.06666600  | 1.52605200  |
| H  | 4.20793400  | -1.72643400 | 3.23901300  | H | -5.08343000 | -1.14291000 | 1.55459900  |
| C  | 3.13344300  | -1.88460400 | 3.12024000  | H | -4.89867500 | 0.43187100  | 2.31665100  |
| O  | 2.80211000  | -2.04693600 | 1.72943700  | C | -7.48002700 | -0.49065100 | 2.82071700  |
| H  | 2.82468900  | -2.81029900 | 3.60484800  | H | -7.14537300 | 1.12790200  | 1.42549900  |
| H  | 2.59994200  | -1.03074400 | 3.54431300  | H | -7.32816600 | -0.44286600 | 0.66299300  |
| C  | 3.10856700  | -1.00438200 | 0.93135400  | H | -8.56776000 | -0.36968600 | 2.83871800  |
| C  | 2.77685700  | -1.32468300 | -0.53357500 | H | -7.26221100 | -1.55894600 | 2.93032000  |
| O  | 3.59609300  | 0.02499500  | 1.34689400  | H | -7.07379800 | 0.02218200  | 3.70010300  |
| C  | 3.73786700  | -2.43515300 | -1.00189900 | H | -0.41514900 | -0.00960000 | 1.81014600  |
| O  | 3.43616600  | -3.35663700 | -1.72581700 | H | -1.80516300 | 0.84578900  | 2.50484800  |
| O  | 4.98507900  | -2.21699900 | -0.54358300 | C | -3.05419900 | 2.11286100  | -2.38678800 |
| C  | 5.98179800  | -3.16346200 | -0.97514200 | O | -3.71476600 | 2.95789600  | -2.78784400 |
| H  | 6.06460600  | -3.15778800 | -2.06423300 | C | -0.56339800 | 1.66494300  | -4.39724500 |
| H  | 6.91391300  | -2.83503300 | -0.51689700 | C | 0.61554400  | 1.52934400  | -5.35170900 |
| H  | 5.71991300  | -4.17044200 | -0.64233300 | C | 0.45248900  | -0.79422400 | -5.27505400 |
| C  | -1.04040800 | -1.00373400 | -0.67534400 | C | -0.73492800 | -0.70332500 | -4.32684100 |
| C  | -0.44965500 | 1.65892400  | -0.60834500 | O | 0.51404600  | 0.33949700  | -6.12701000 |
| H  | -0.28136800 | 2.60009300  | -1.12568800 | O | -0.63751100 | 0.50466400  | -3.53612200 |
| C  | 3.01628100  | -0.09128700 | -1.43571300 | H | 1.38781400  | -0.89056400 | -4.69813600 |
| H  | 3.01729200  | -0.42826600 | -2.48035400 | H | 0.34884100  | -1.67494000 | -5.91686900 |
| H  | 4.01439400  | 0.30576200  | -1.25006100 | H | -1.68176300 | -0.69444500 | -4.87681300 |
| S  | 2.49359000  | 2.58536200  | -1.87378600 | H | -0.75441800 | -1.53536400 | -3.62221000 |
| O  | 1.33651500  | 3.33830100  | -2.41131000 | H | 0.62381300  | 2.36931000  | -6.05283100 |
| O  | 3.61511100  | 2.28067000  | -2.78408500 | H | 1.55791300  | 1.54164300  | -4.78441100 |
| C  | 3.15049700  | 3.60322700  | -0.53030900 | H | -0.42186500 | 2.52735500  | -3.74689200 |
| C  | 2.79512700  | 4.95436300  | -0.51813600 | H | -1.50388900 | 1.74988900  | -4.95918500 |
| C  | 4.04610700  | 3.07814800  | 0.40397400  | C | 0.55905900  | 2.43781800  | 1.59952300  |
| C  | 3.34767600  | 5.79343300  | 0.45047000  | C | 0.48675300  | 2.84380600  | 3.07837400  |
| H  | 2.09435500  | 5.32792200  | -1.25621000 | H | 0.94541200  | 3.28855800  | 1.02886100  |
| C  | 4.58279300  | 3.92707700  | 1.37270100  | H | 1.30897200  | 1.64675600  | 1.50244200  |
| H  | 4.29082200  | 2.02300500  | 0.41209800  | H | 1.49846500  | 3.03789900  | 3.44934200  |
| C  | 4.23961900  | 5.28121700  | 1.39478900  | H | -0.09330800 | 3.75733000  | 3.23323700  |
| H  | 3.07901100  | 6.84556400  | 0.46682700  | H | 0.05339700  | 2.05788400  | 3.70735000  |
| H  | 5.27049400  | 3.52616400  | 2.11131000  | C | -1.82799200 | 3.09623700  | 0.94163100  |
| H  | 4.66514100  | 5.93596800  | 2.14986100  | C | -2.72577800 | 3.24012400  | 2.18021300  |
| C  | -0.75361000 | 1.96301200  | 0.91390600  | H | -2.48553600 | 2.97627900  | 0.07628100  |
| C  | -1.25481300 | 0.65178000  | 1.57965100  | H | -1.29524300 | 4.04089700  | 0.77318000  |
| C  | -1.57452600 | -2.40907600 | -0.64594400 | H | -3.34931600 | 4.13459400  | 2.07653900  |
| H  | -1.16700700 | -2.99321300 | -1.47991000 | H | -3.40609300 | 2.38981700  | 2.29027200  |
| H  | -1.29154000 | -2.92519700 | 0.28172500  | H | -2.16701200 | 3.33899000  | 3.11311700  |
| H  | -2.65992200 | -2.42024700 | -0.74180800 |   |             |             |             |

INT-2<sup>th</sup>

|   |             |             |             |                          |             |             |             |
|---|-------------|-------------|-------------|--------------------------|-------------|-------------|-------------|
| C | 2.47182900  | -2.03585600 | -1.18935300 | O                        | -0.35001200 | 2.42185900  | -1.25100900 |
| C | 2.23213000  | -0.61136600 | -1.74189000 | C                        | 2.13763900  | 2.59015500  | -2.16958400 |
| H | 3.16650000  | -0.04022500 | -1.66255400 | C                        | 2.83072200  | 2.53368500  | -3.38099800 |
| H | 1.98738300  | -0.68707700 | -2.80345300 | C                        | 2.56492400  | 3.40838500  | -1.12011100 |
| C | 2.37789700  | -2.03570200 | 0.35823000  | C                        | 3.98260400  | 3.30586500  | -3.53826700 |
| H | 2.57791700  | -3.03498200 | 0.74344700  | H                        | 2.45442100  | 1.90859700  | -4.18322500 |
| H | 3.15230500  | -1.36432500 | 0.74570400  | C                        | 3.71951000  | 4.17182400  | -1.29057100 |
| C | 1.13435300  | 0.16087400  | -1.02959500 | H                        | 1.99989800  | 3.45749300  | -0.19798400 |
| C | 0.57361900  | -0.23501000 | 0.15080500  | C                        | 4.42764100  | 4.11936200  | -2.49428700 |
| C | -0.59701700 | 0.36659000  | 0.87876400  | H                        | 4.52705200  | 3.27534300  | -4.47724900 |
| H | -1.08500600 | 1.11220200  | 0.26199200  | H                        | 4.06186000  | 4.81393000  | -0.48471300 |
| C | -0.40467100 | 0.99282000  | 2.30629300  | H                        | 5.32434000  | 4.71909900  | -2.62022000 |
| C | -0.00603000 | -0.02173400 | 3.43091000  | C                        | -1.73886200 | 1.70325800  | 2.68260800  |
| H | -0.64669200 | -0.89591800 | 3.31487200  | C                        | 0.70691000  | 2.07927400  | 2.24365800  |
| H | 1.00921800  | -0.36331300 | 3.20835100  | Rh                       | -1.62556300 | -1.46023400 | 0.51213900  |
| C | -0.08294600 | 0.43228200  | 4.81870500  | Cl                       | -2.51815500 | -3.62078400 | -0.31245500 |
| C | -0.15139300 | 0.73413100  | 5.98749500  | C                        | -2.71643300 | -1.68227000 | 1.95733500  |
| C | -0.27480300 | 1.16165400  | 7.38121800  | O                        | -3.41108100 | -1.92465600 | 2.83944300  |
| C | -1.59088000 | 1.91842700  | 7.66212100  | C                        | 0.07650700  | -3.55494100 | 2.05187400  |
| H | 0.57801000  | 1.80357100  | 7.64214600  | H                        | -0.54455100 | -4.31518500 | 1.56970100  |
| H | -0.20814000 | 0.28636200  | 8.04208300  | H                        | 1.10509500  | -3.92036900 | 2.14247700  |
| C | -1.69750900 | 2.40181500  | 9.11279400  | H                        | -0.31544900 | -3.41352100 | 3.06715100  |
| H | -1.66234300 | 2.77122500  | 6.97606500  | C                        | -3.12201200 | 0.00230800  | -3.54088100 |
| H | -2.43649700 | 1.26124300  | 7.42424600  | C                        | -3.00377300 | -1.03907300 | -2.43784500 |
| C | -3.00217500 | 3.15269300  | 9.39737000  | C                        | -3.85485600 | 0.57634900  | -0.89109000 |
| H | -1.61407700 | 1.54075600  | 9.79007700  | C                        | -3.95111200 | 1.57988300  | -2.03303800 |
| H | -0.84257600 | 3.05267400  | 9.34193800  | O                        | -2.79579400 | -0.36876200 | -1.16373600 |
| H | -3.05037800 | 3.48891700  | 10.43812500 | O                        | -4.18471200 | 0.91383000  | -3.26591800 |
| H | -3.09730400 | 4.03662700  | 8.75679600  | H                        | -3.60197200 | 1.06879000  | 0.04883400  |
| H | -3.87445700 | 2.51577300  | 9.21234200  | H                        | -4.79790400 | 0.02361900  | -0.77970500 |
| C | 1.00460900  | -1.54402000 | 0.72274600  | H                        | -4.79612400 | 2.25554600  | -1.86563600 |
| C | 0.01769800  | -2.27692700 | 1.29168600  | H                        | -3.02379000 | 2.17036000  | -2.07708100 |
| C | 1.41771100  | -2.99257400 | -1.78312200 | H                        | -3.91095700 | -1.64946500 | -2.36449500 |
| O | 0.52275000  | -2.65904100 | -2.52691400 | H                        | -2.14331200 | -1.69209800 | -2.58896900 |
| O | 1.61938200  | -4.24775400 | -1.35226200 | H                        | -2.16960600 | 0.53896700  | -3.65238600 |
| C | 3.86910000  | -2.50826600 | -1.61253400 | H                        | -3.36384700 | -0.49163400 | -4.48711600 |
| O | 4.80549000  | -2.66842900 | -0.86269300 | F                        | -2.66563000 | 0.80115700  | 3.07701100  |
| O | 3.92852300  | -2.69055200 | -2.94554300 | F                        | -1.59850500 | 2.58962500  | 3.67979300  |
| C | 0.66605500  | -5.22869300 | -1.82582200 | F                        | -2.27344300 | 2.37914400  | 1.64003400  |
| H | 0.69205400  | -5.27782100 | -2.91670600 | F                        | 0.38092000  | 3.08265100  | 1.40341500  |
| H | 0.98775000  | -6.17435500 | -1.39062700 | F                        | 0.97612600  | 2.63410800  | 3.43571400  |
| H | -0.33952100 | -4.96293700 | -1.49296300 | F                        | 1.87045500  | 1.54086800  | 1.80357100  |
| C | 5.20270700  | -3.12389800 | -3.45820500 | <b>TS2ff<sup>†</sup></b> |             |             |             |
| H | 5.06703900  | -3.22002200 | -4.53479400 | C                        | 0.61900800  | 0.56560400  | -0.67931500 |
| H | 5.97655200  | -2.38718600 | -3.23021700 | C                        | 0.29713600  | -0.86558800 | -0.54276200 |
| H | 5.48349500  | -4.08294500 | -3.01691300 | Rh                       | -2.03232400 | 0.36661800  | -1.59801200 |
| S | 0.63246100  | 1.61018300  | -1.99046500 | Cl                       | -3.51703100 | -1.09883100 | -2.98418900 |
| O | 0.29538400  | 1.10767700  | -3.33680500 | C                        | 1.38443200  | -1.91474700 | -0.52319700 |

|   |             |             |             |   |             |             |             |
|---|-------------|-------------|-------------|---|-------------|-------------|-------------|
| C | 1.85211000  | 0.91719900  | -1.14404100 | C | -4.88805700 | 0.13329300  | -0.07850800 |
| H | 1.23329900  | -2.59909800 | 0.31740300  | C | -5.51363700 | -0.12195700 | 1.30570300  |
| H | 1.31645100  | -2.53350400 | -1.42517200 | H | -5.30375300 | -0.54585600 | -0.83282400 |
| H | 4.35859900  | -1.46548800 | 3.27120500  | H | -5.13208500 | 1.14619500  | -0.42521800 |
| C | 3.26896700  | -1.50140700 | 3.20471200  | C | -7.04107900 | 0.02039900  | 1.28471400  |
| O | 2.85631300  | -1.79836000 | 1.85728700  | H | -5.24051000 | -1.12935900 | 1.64465400  |
| H | 2.87156000  | -2.31049000 | 3.81705000  | H | -5.08814900 | 0.58312000  | 2.03171700  |
| H | 2.85768100  | -0.53986000 | 3.51859300  | C | -7.68157700 | -0.23386200 | 2.65261300  |
| C | 3.27541800  | -0.92458100 | 0.92132600  | H | -7.30544900 | 1.02740400  | 0.93549800  |
| C | 2.81332800  | -1.34073300 | -0.48566900 | H | -7.45715100 | -0.67794800 | 0.54671900  |
| O | 3.96076600  | 0.04100700  | 1.17342500  | H | -8.76981000 | -0.12629800 | 2.60671000  |
| C | 3.78189300  | -2.42191100 | -1.01439700 | H | -7.46206300 | -1.24585200 | 3.01103600  |
| O | 3.47322800  | -3.29221800 | -1.79814900 | H | -7.30867600 | 0.47214400  | 3.40320700  |
| O | 5.02804600  | -2.24670300 | -0.54368800 | H | -0.74756700 | -0.41307400 | 1.96340900  |
| C | 6.01775600  | -3.16886600 | -1.04032700 | H | -2.20097300 | 0.44748100  | 2.50645400  |
| H | 6.10339000  | -3.08521500 | -2.12597100 | C | -3.03825700 | 1.92052200  | -2.35600300 |
| H | 6.95081300  | -2.88196200 | -0.55704700 | O | -3.69902900 | 2.77433400  | -2.73176800 |
| H | 5.74594400  | -4.19470300 | -0.78156300 | C | -0.64621800 | 1.60375900  | -4.36330500 |
| C | -1.02107900 | -1.22417600 | -0.66295700 | C | 0.51339800  | 1.63693400  | -5.35010700 |
| C | -0.55980300 | 1.46413300  | -0.41764700 | C | 0.74982300  | -0.67336500 | -5.21087800 |
| H | -0.40394500 | 2.45838500  | -0.82357900 | C | -0.40676500 | -0.76027500 | -4.22412100 |
| C | 2.91061000  | -0.12893700 | -1.44646800 | O | 0.58333500  | 0.42461000  | -6.09402100 |
| H | 2.79096200  | -0.49516700 | -2.47376400 | O | -0.51108300 | 0.47167700  | -3.47010500 |
| H | 3.90967000  | 0.30135200  | -1.38966700 | H | 1.70616500  | -0.58440200 | -4.66926500 |
| S | 2.27470200  | 2.55101400  | -1.78755500 | H | 0.78072300  | -1.58030400 | -5.82312700 |
| O | 1.03916200  | 3.27675000  | -2.16275500 | H | -1.35498100 | -0.94396600 | -4.73917900 |
| O | 3.28305900  | 2.28793800  | -2.83360900 | H | -0.24716300 | -1.55504800 | -3.49355100 |
| C | 3.06724800  | 3.55021300  | -0.51030100 | H | 0.36175400  | 2.44667100  | -6.07046500 |
| C | 2.59743300  | 4.85279000  | -0.33033200 | H | 1.45637700  | 1.81519300  | -4.81345500 |
| C | 4.16329200  | 3.06462200  | 0.20621600  | H | -0.62996700 | 2.49381400  | -3.73406000 |
| C | 3.24299700  | 5.68580800  | 0.58357600  | H | -1.60214700 | 1.51837800  | -4.89747600 |
| H | 1.74090200  | 5.19483800  | -0.89943500 | F | 1.00854900  | 2.95374500  | 1.53217900  |
| C | 4.79134800  | 3.90568200  | 1.12472100  | F | 1.14860400  | 0.85203500  | 2.05422000  |
| H | 4.50360200  | 2.04352400  | 0.08872100  | F | -0.05091200 | 2.18027400  | 3.26519200  |
| C | 4.33760800  | 5.21372600  | 1.31023000  | F | -1.34520100 | 3.94648600  | 1.06126100  |
| H | 2.88688200  | 6.70127300  | 0.72931800  | F | -2.45062800 | 2.79516500  | 2.54050000  |
| H | 5.63659700  | 3.53426800  | 1.69611700  | F | -2.99314700 | 2.68607100  | 0.45467900  |
| H | 4.83493100  | 5.86355600  | 2.02458600  |   |             |             |             |
| C | -0.93456100 | 1.58385400  | 1.10954000  |   |             |             |             |
| C | -1.54670900 | 0.25873800  | 1.65104800  |   |             |             |             |
| C | 0.30548900  | 1.91074100  | 1.99046800  |   |             |             |             |
| C | -1.93641200 | 2.76001600  | 1.29261500  |   |             |             |             |
| C | -1.48128600 | -2.65332200 | -0.72773000 |   |             |             |             |
| H | -0.99866700 | -3.17444200 | -1.56359200 |   |             |             |             |
| H | -1.22073500 | -3.19852600 | 0.18969800  |   |             |             |             |
| H | -2.55773200 | -2.71604600 | -0.88432000 |   |             |             |             |
| C | -2.32521100 | -0.30250700 | 0.51629400  |   |             |             |             |
| C | -3.42280200 | -0.01783200 | -0.08458200 |   |             |             |             |
